# Supplementary material for: Great ape Y Chromosome and mitochondrial DNA phylogenies reflect subspecies structure and patterns of mating and dispersal
Source: Genome Res. 2016 Apr;26(4):427–39. doi: 10.1101/gr.198754.115 (PMC4817767; doi:10.1101/gr.198754.115)
Supplement: Supplemental Material [file supp_gr.198754.115_Supplemental_Table_S7-S13.xlsx]

## Sheet: TableS7
Supplemental Table S7: Coordinates of analysed autosomal and X-Chromosomal regions.
	GRCh37/hg19
Chr	start	end
1	4369714	4370433
1	4370025	4370744
1	4548947	4549666
1	4606111	4606830
1	4620636	4621355
1	4731568	4732287
1	4798840	4799559
1	4980332	4981051
1	4987064	4987783
1	4995825	4996544
1	5067850	5068569
1	5088634	5089353
1	5253304	5254023
1	5325364	5326083
1	5657907	5658626
1	5748251	5748970
1	6140965	6141684
1	6712754	6713473
1	6944444	6945163
1	7236450	7237169
1	7360978	7361697
1	7626635	7627354
1	9038662	9039381
1	9222800	9223519
1	10218079	10218798
1	10608038	10608757
1	10655991	10656710
1	10801225	10801944
1	11204698	11205417
1	11886943	11887662
1	12785134	12785853
1	13801965	13802684
1	13913870	13914589
1	14108754	14109473
1	14494643	14495362
1	14508916	14509635
1	14822830	14823549
1	14870208	14870927
1	14947560	14948279
1	15304499	15305218
1	15350923	15351642
1	15357145	15357864
1	15504043	15504762
1	15680091	15680810
1	15762980	15763699
1	15834000	15834719
1	16201142	16201861
1	16266787	16267506
1	18031173	18031892
1	18314261	18314980
1	18349404	18350123
1	18489701	18490420
1	18812666	18813385
1	19456897	19457616
1	19927193	19927912
1	20079950	20080669
1	20139676	20140395
1	20582325	20583044
1	20656992	20657711
1	20662578	20663297
1	20770527	20771246
1	20829767	20830486
1	21544241	21544960
1	21820498	21821217
1	21826206	21826925
1	22981516	22982235
1	23154871	23155590
1	23607355	23608074
1	23847682	23848401
1	24476010	24476729
1	24683756	24684475
1	25193939	25194658
1	25223961	25224680
1	26755849	26756568
1	26865328	26866047
1	29630596	29631315
1	29792845	29793564
1	29796285	29797004
1	30148292	30149011
1	30300948	30301667
1	30381129	30381848
1	30393430	30394149
1	30477746	30478465
1	30808192	30808911
1	30918093	30918812
1	30962114	30962833
1	31461078	31461797
1	31787953	31788672
1	32092165	32092884
1	32168519	32169238
1	32867913	32868632
1	33638376	33639095
1	34697128	34697847
1	34735578	34736297
1	35117975	35118694
1	36753304	36754023
1	37193285	37194004
1	37240526	37241245
1	37543863	37544582
1	37961253	37961972
1	38900283	38901002
1	39060540	39061259
1	39081469	39082188
1	39944937	39945656
1	40095693	40096412
1	40626558	40627277
1	41010094	41010813
1	41374083	41374802
1	41386511	41387230
1	41437057	41437776
1	42328760	42329479
1	43102484	43103203
1	43154702	43155421
1	43367515	43368234
1	44012995	44013714
1	44131434	44132153
1	44419888	44420607
1	44603146	44603865
1	45798195	45798914
1	46502476	46503195
1	46722579	46723298
1	47271825	47272544
1	47609129	47609848
1	47665786	47666505
1	47868956	47869675
1	47937769	47938488
1	48117828	48118547
1	48164262	48164981
1	48262259	48262978
1	48309227	48309946
1	48387067	48387786
1	48520417	48521136
1	48523820	48524539
1	48856953	48857672
1	49032936	49033655
1	49033374	49034093
1	49164375	49165094
1	49210210	49210929
1	50647672	50648391
1	50809614	50810333
1	50975946	50976665
1	53038886	53039605
1	53114376	53115095
1	53605524	53606243
1	54009016	54009735
1	54129345	54130064
1	54624932	54625651
1	54953163	54953882
1	55119155	55119874
1	55939634	55940353
1	55992395	55993114
1	56057489	56058208
1	56200664	56201383
1	56320513	56321232
1	56397677	56398396
1	56881403	56882122
1	56904712	56905431
1	57209335	57210054
1	57222239	57222958
1	57349254	57349973
1	57525121	57525840
1	57537292	57538011
1	57562714	57563433
1	57574709	57575428
1	57584361	57585080
1	57709894	57710613
1	57846715	57847434
1	57966168	57966887
1	58301742	58302461
1	58375606	58376325
1	58420475	58421194
1	58537001	58537720
1	58851265	58851984
1	58915264	58915983
1	58933098	58933817
1	58939274	58939993
1	59406630	59407349
1	59844111	59844830
1	60388314	60389033
1	60416630	60417349
1	60504607	60505326
1	60506384	60507103
1	60738941	60739660
1	60875786	60876505
1	61162020	61162739
1	61355011	61355730
1	61364561	61365280
1	61414078	61414797
1	61441592	61442311
1	61606674	61607393
1	61681114	61681833
1	61703861	61704580
1	61863871	61864590
1	61952214	61952933
1	62101947	62102666
1	62131447	62132166
1	62400127	62400846
1	62607426	62608145
1	62633221	62633940
1	62847753	62848472
1	62874953	62875672
1	63487868	63488587
1	63611921	63612640
1	63688886	63689605
1	63871398	63872117
1	64125079	64125798
1	64127849	64128568
1	64189578	64190297
1	64276675	64277394
1	64538601	64539320
1	64572801	64573520
1	64642917	64643636
1	65341207	65341926
1	65367682	65368401
1	65515173	65515892
1	65527817	65528536
1	65529754	65530473
1	66190715	66191434
1	66312233	66312952
1	66456884	66457603
1	66735241	66735960
1	66767769	66768488
1	66920294	66921013
1	66992253	66992972
1	67150825	67151544
1	67908284	67909003
1	68085226	68085945
1	68164138	68164857
1	68243037	68243756
1	68290586	68291305
1	68411315	68412034
1	68583161	68583880
1	68747655	68748374
1	68816440	68817159
1	68846888	68847607
1	69023893	69024612
1	70516831	70517550
1	71009847	71010566
1	71116077	71116796
1	71394323	71395042
1	71987136	71987855
1	72012573	72013292
1	72050846	72051565
1	72058045	72058764
1	72289311	72290030
1	73173546	73174265
1	73241371	73242090
1	74365286	74366005
1	74699552	74700271
1	74799725	74800444
1	76067919	76068638
1	76697608	76698327
1	76899104	76899823
1	77019626	77020345
1	77196234	77196953
1	77196658	77197377
1	77240183	77240902
1	77462302	77463021
1	77869773	77870492
1	78562629	78563348
1	78643314	78644033
1	78749548	78750267
1	78831431	78832150
1	78866987	78867706
1	79869513	79870232
1	79973079	79973798
1	80402807	80403526
1	80416202	80416921
1	80514346	80515065
1	80655754	80656473
1	80964130	80964849
1	81329405	81330124
1	81476699	81477418
1	81671481	81672200
1	81677038	81677757
1	81780180	81780899
1	82145742	82146461
1	82276226	82276945
1	82461270	82461989
1	82561199	82561918
1	82570826	82571545
1	82711753	82712472
1	82900904	82901623
1	83014014	83014733
1	83037540	83038259
1	83103073	83103792
1	83801409	83802128
1	84062074	84062793
1	84667092	84667811
1	84856424	84857143
1	84866048	84866767
1	84914940	84915659
1	85109965	85110684
1	85214183	85214902
1	85297751	85298470
1	85341122	85341841
1	85559904	85560623
1	85915042	85915761
1	86010697	86011416
1	86952241	86952960
1	87833083	87833802
1	87833899	87834618
1	87838248	87838967
1	87868180	87868899
1	87979402	87980121
1	88182358	88183077
1	88189677	88190396
1	88260179	88260898
1	88364689	88365408
1	89388584	89389303
1	89472815	89473534
1	90131709	90132428
1	90237658	90238377
1	90348987	90349706
1	90594630	90595349
1	90598524	90599243
1	91081023	91081742
1	92013691	92014410
1	92016293	92017012
1	92108901	92109620
1	92202107	92202826
1	92227488	92228207
1	92831209	92831928
1	93303243	93303962
1	93481280	93481999
1	94205802	94206521
1	94480708	94481427
1	94481544	94482263
1	94486994	94487713
1	94537282	94538001
1	94560578	94561297
1	94596507	94597226
1	94607247	94607966
1	94850083	94850802
1	95004860	95005579
1	95231912	95232631
1	95297014	95297733
1	95776428	95777147
1	95804642	95805361
1	95832251	95832970
1	96105837	96106556
1	96142825	96143544
1	96143073	96143792
1	96248668	96249387
1	96334118	96334837
1	96441774	96442493
1	96441954	96442673
1	96515892	96516611
1	96565866	96566585
1	96665778	96666497
1	97258108	97258827
1	97296575	97297294
1	97435530	97436249
1	97748838	97749557
1	98315925	98316644
1	98719910	98720629
1	99566113	99566832
1	99601249	99601968
1	99639085	99639804
1	99647061	99647780
1	99783531	99784250
1	99872381	99873100
1	99921856	99922575
1	99963016	99963735
1	100051308	100052027
1	100156298	100157017
1	100886610	100887329
1	100984079	100984798
1	101076963	101077682
1	101198348	101199067
1	101203467	101204186
1	101669568	101670287
1	101726166	101726885
1	101766914	101767633
1	101849470	101850189
1	101868433	101869152
1	101895585	101896304
1	102303792	102304511
1	102365780	102366499
1	102828463	102829182
1	103661898	103662617
1	104889726	104890445
1	104901165	104901884
1	104975368	104976087
1	105219403	105220122
1	105785286	105786005
1	105825201	105825920
1	107113144	107113863
1	107350102	107350821
1	107360717	107361436
1	107430119	107430838
1	107644885	107645604
1	107789148	107789867
1	107836799	107837518
1	107909518	107910237
1	107963914	107964633
1	108202350	108203069
1	108222106	108222825
1	108281360	108282079
1	108285028	108285747
1	108575907	108576626
1	109108035	109108754
1	109392541	109393260
1	109738711	109739430
1	109768529	109769248
1	110418069	110418788
1	110426418	110427137
1	110846002	110846721
1	110992989	110993708
1	110998494	110999213
1	111069251	111069970
1	111262449	111263168
1	111295314	111296033
1	111342130	111342849
1	111730541	111731260
1	111789250	111789969
1	111827389	111828108
1	111853736	111854455
1	111924989	111925708
1	112127358	112128077
1	112469733	112470452
1	112721555	112722274
1	113751280	113751999
1	113876059	113876778
1	114438591	114439310
1	114652676	114653395
1	114670609	114671328
1	114719658	114720377
1	115227133	115227852
1	115759033	115759752
1	115768549	115769268
1	115895478	115896197
1	115942717	115943436
1	116205488	116206207
1	116206063	116206782
1	116220091	116220810
1	116222899	116223618
1	116302232	116302951
1	116469075	116469794
1	116578656	116579375
1	116795164	116795883
1	116833745	116834464
1	117271208	117271927
1	117514315	117515034
1	117531453	117532172
1	117636133	117636852
1	117654498	117655217
1	117772842	117773561
1	118224418	118225137
1	118439635	118440354
1	119101562	119102281
1	119457874	119458593
1	119829866	119830585
1	119864637	119865356
1	120291919	120292638
1	145727323	145728042
1	146630556	146631275
1	146692869	146693588
1	146693069	146693788
1	147091612	147092331
1	147208041	147208760
1	147235235	147235954
1	147238126	147238845
1	147241363	147242082
1	147814334	147815053
1	150618272	150618991
1	150669592	150670311
1	150802667	150803386
1	151510908	151511627
1	152539033	152539752
1	152783895	152784614
1	152926331	152927050
1	153098985	153099704
1	153277063	153277782
1	153294293	153295012
1	153324796	153325515
1	153633698	153634417
1	154123163	154123882
1	154196766	154197485
1	154573607	154574326
1	154779184	154779903
1	154796535	154797254
1	155850198	155850917
1	156205761	156206480
1	157386034	157386753
1	158324065	158324784
1	158684676	158685395
1	158736085	158736804
1	158852593	158853312
1	158908804	158909523
1	159089896	159090615
1	159160919	159161638
1	159410615	159411334
1	159646564	159647283
1	159679276	159679995
1	159772391	159773110
1	159833373	159834092
1	159835313	159836032
1	159907685	159908404
1	160162512	160163231
1	160318624	160319343
1	160371749	160372468
1	160598650	160599369
1	160604113	160604832
1	160737982	160738701
1	160793200	160793919
1	160827925	160828644
1	160878553	160879272
1	161053694	161054413
1	161144645	161145364
1	161172165	161172884
1	161179517	161180236
1	161189353	161190072
1	161236276	161236995
1	161676197	161676916
1	161702403	161703122
1	161930370	161931089
1	162040518	162041237
1	162160560	162161279
1	162193378	162194097
1	162669683	162670402
1	162680791	162681510
1	162690579	162691298
1	162802255	162802974
1	162830957	162831676
1	162832046	162832765
1	162900003	162900722
1	163113518	163114237
1	163137229	163137948
1	163292002	163292721
1	163391178	163391897
1	163501966	163502685
1	163596278	163596997
1	163795770	163796489
1	164020692	164021411
1	164270756	164271475
1	164488097	164488816
1	164554926	164555645
1	164657697	164658416
1	164688968	164689687
1	164739491	164740210
1	164743819	164744538
1	164792818	164793537
1	164807470	164808189
1	165087132	165087851
1	165317636	165318355
1	165379212	165379931
1	165464921	165465640
1	165654509	165655228
1	165873032	165873751
1	165903602	165904321
1	166128046	166128765
1	166304050	166304769
1	166307850	166308569
1	166362291	166363010
1	166594849	166595568
1	166947321	166948040
1	167096571	167097290
1	167156140	167156859
1	167400894	167401613
1	167510636	167511355
1	167541977	167542696
1	167814245	167814964
1	168090539	168091258
1	168269750	168270469
1	168412861	168413580
1	168489487	168490206
1	168568551	168569270
1	168677964	168678683
1	168865253	168865972
1	168888586	168889305
1	168891821	168892540
1	169026570	169027289
1	169030518	169031237
1	169065991	169066710
1	169084759	169085478
1	169528470	169529189
1	169670728	169671447
1	169696586	169697305
1	169823300	169824019
1	169899067	169899786
1	170298649	170299368
1	171061746	171062465
1	171088494	171089213
1	171116753	171117472
1	171749305	171750024
1	172410607	172411326
1	172445523	172446242
1	172501283	172502002
1	172612881	172613600
1	172639222	172639941
1	173012444	173013163
1	173164205	173164924
1	173325553	173326272
1	173859822	173860541
1	173891741	173892460
1	174793784	174794503
1	175092480	175093199
1	175411552	175412271
1	175442511	175443230
1	175592945	175593664
1	175646681	175647400
1	175652560	175653279
1	175658171	175658890
1	175687160	175687879
1	176429004	176429723
1	176878319	176879038
1	176918315	176919034
1	177362653	177363372
1	177380962	177381681
1	177648373	177649092
1	177648510	177649229
1	177738871	177739590
1	177745094	177745813
1	177755467	177756186
1	177806478	177807197
1	177904814	177905533
1	177915114	177915833
1	178551112	178551831
1	178782265	178782984
1	179516780	179517499
1	179518099	179518818
1	179732833	179733552
1	180200824	180201543
1	180495310	180496029
1	180933687	180934406
1	180957602	180958321
1	180975731	180976450
1	181039268	181039987
1	181154475	181155194
1	181185501	181186220
1	181328826	181329545
1	181335147	181335866
1	181415434	181416153
1	181479823	181480542
1	182237398	182238117
1	182249513	182250232
1	182312116	182312835
1	182537134	182537853
1	182591976	182592695
1	183515417	183516136
1	183542027	183542746
1	183784814	183785533
1	183813498	183814217
1	184194715	184195434
1	184332631	184333350
1	184430482	184431201
1	184572722	184573441
1	184597639	184598358
1	184808993	184809712
1	184904901	184905620
1	185495483	185496202
1	185755249	185755968
1	186156154	186156873
1	186316128	186316847
1	186359390	186360109
1	186650347	186651066
1	186953835	186954554
1	187629826	187630545
1	187744263	187744982
1	187903438	187904157
1	189317261	189317980
1	190009885	190010604
1	190287353	190288072
1	190548169	190548888
1	190576976	190577695
1	190735097	190735816
1	191428121	191428840
1	192095917	192096636
1	192390273	192390992
1	192510823	192511542
1	192523689	192524408
1	194095782	194096501
1	194096072	194096791
1	194405251	194405970
1	194416450	194417169
1	194571925	194572644
1	194638970	194639689
1	195166551	195167270
1	195240746	195241465
1	195376612	195377331
1	195672224	195672943
1	195686241	195686960
1	195933790	195934509
1	196397459	196398178
1	197312829	197313548
1	197811206	197811925
1	198326808	198327527
1	198484067	198484786
1	199037683	199038402
1	199193529	199194248
1	199311920	199312639
1	199316101	199316820
1	199348482	199349201
1	199486461	199487180
1	199555212	199555931
1	199622653	199623372
1	200007072	200007791
1	200079420	200080139
1	200084644	200085363
1	200167105	200167824
1	200177364	200178083
1	200323803	200324522
1	200672339	200673058
1	200857414	200858133
1	200881235	200881954
1	201015936	201016655
1	201020491	201021210
1	201158616	201159335
1	201392404	201393123
1	201456694	201457413
1	201606912	201607631
1	201677071	201677790
1	202093375	202094094
1	202188256	202188975
1	202370637	202371356
1	202594793	202595512
1	202826178	202826897
1	203016727	203017446
1	203047261	203047980
1	203371210	203371929
1	203948300	203949019
1	204069478	204070197
1	204369515	204370234
1	204451768	204452487
1	204494216	204494935
1	204681907	204682626
1	204852978	204853697
1	204926776	204927495
1	204969226	204969945
1	205070213	205070932
1	205464672	205465391
1	205532722	205533441
1	205552504	205553223
1	205567853	205568572
1	205770813	205771532
1	205801512	205802231
1	205812254	205812973
1	205887912	205888631
1	206617322	206618041
1	206939544	206940263
1	207470100	207470819
1	207634310	207635029
1	207646102	207646821
1	207894056	207894775
1	208113371	208114090
1	208187836	208188555
1	208267218	208267937
1	208339241	208339960
1	208425311	208426030
1	208640245	208640964
1	208676358	208677077
1	208750456	208751175
1	208777246	208777965
1	208777535	208778254
1	208830251	208830970
1	209007418	209008137
1	209527346	209528065
1	209603636	209604355
1	209651175	209651894
1	209662018	209662737
1	209728230	209728949
1	209844157	209844876
1	209851537	209852256
1	209860308	209861027
1	209931761	209932480
1	209955488	209956207
1	210706705	210707424
1	210869760	210870479
1	211056826	211057545
1	211188577	211189296
1	211662861	211663580
1	211712330	211713049
1	212106946	212107665
1	212353458	212354177
1	212431071	212431790
1	212772968	212773687
1	212852309	212853028
1	213063849	213064568
1	213526882	213527601
1	214083106	214083825
1	214108281	214109000
1	214163315	214164034
1	214224392	214225111
1	214230021	214230740
1	214465708	214466427
1	214540976	214541695
1	214711891	214712610
1	214920523	214921242
1	215080530	215081249
1	215366888	215367607
1	215452926	215453645
1	215889050	215889769
1	216069171	216069890
1	216117480	216118199
1	216138593	216139312
1	216167284	216168003
1	216292206	216292925
1	216760747	216761466
1	216840011	216840730
1	217061780	217062499
1	217082025	217082744
1	217123655	217124374
1	217350023	217350742
1	217352054	217352773
1	218038119	218038838
1	218107728	218108447
1	218251332	218252051
1	218348549	218349268
1	218352851	218353570
1	218555937	218556656
1	218632565	218633284
1	218688795	218689514
1	218719040	218719759
1	219001303	219002022
1	219588443	219589162
1	219619178	219619897
1	219881534	219882253
1	219977899	219978618
1	219981804	219982523
1	220087687	220088406
1	220489184	220489903
1	220504063	220504782
1	221255629	221256348
1	221393515	221394234
1	221714776	221715495
1	221715359	221716078
1	222020848	222021567
1	223468372	223469091
1	223840866	223841585
1	223951481	223952200
1	223953110	223953829
1	224251478	224252197
1	224284015	224284734
1	224644189	224644908
1	224729573	224730292
1	224881468	224882187
1	224888272	224888991
1	224911574	224912293
1	224991174	224991893
1	225508352	225509071
1	225527980	225528699
1	225883039	225883758
1	226554942	226555661
1	228879661	228880380
1	229113838	229114557
1	229663912	229664631
1	229798514	229799233
1	230286768	230287487
1	230384610	230385329
1	230402264	230402983
1	230746930	230747649
1	230906871	230907590
1	230978366	230979085
1	231078132	231078851
1	231253643	231254362
1	231261942	231262661
1	231733435	231734154
1	231827716	231828435
1	231850919	231851638
1	231894248	231894967
1	231912533	231913252
1	232020888	232021607
1	232024814	232025533
1	232146850	232147569
1	232522388	232523107
1	232541487	232542206
1	232734874	232735593
1	233241646	233242365
1	233668391	233669110
1	233735108	233735827
1	233762541	233763260
1	233856757	233857476
1	234021179	234021898
1	234073331	234074050
1	234249921	234250640
1	234259726	234260445
1	234426118	234426837
1	234426425	234427144
1	234509902	234510621
1	234769139	234769858
1	235498903	235499622
1	235720538	235721257
1	235745656	235746375
1	236140814	236141533
1	236194821	236195540
1	236290672	236291391
1	236339718	236340437
1	236572900	236573619
1	236711621	236712340
1	236881343	236882062
1	236893239	236893958
1	236910983	236911702
1	237048140	237048859
1	237058838	237059557
1	237131155	237131874
1	237209643	237210362
1	237321554	237322273
1	237432879	237433598
1	237536477	237537196
1	237673511	237674230
1	237777468	237778187
1	238714951	238715670
1	238889752	238890471
1	239165869	239166588
1	239350368	239351087
1	239534210	239534929
1	239698764	239699483
1	239870261	239870980
1	239955316	239956035
1	240050980	240051699
1	240069827	240070546
1	240424497	240425216
1	240636656	240637375
1	240637211	240637930
1	240959713	240960432
1	241016333	241017052
1	241247144	241247863
1	241320007	241320726
1	241375787	241376506
1	241464329	241465048
1	241506887	241507606
1	241633053	241633772
1	241729694	241730413
1	241754988	241755707
1	242200887	242201606
1	242356978	242357697
1	242384678	242385397
1	242476895	242477614
1	242547588	242548307
1	242555589	242556308
1	242700443	242701162
1	242767318	242768037
1	242791350	242792069
1	242798612	242799331
1	242811234	242811953
1	242988797	242989516
1	244186260	244186979
1	244334147	244334866
1	244750669	244751388
1	244938138	244938857
1	245289751	245290470
1	245422974	245423693
1	245446361	245447080
1	245636679	245637398
1	245692064	245692783
1	245822539	245823258
1	246113620	246114339
1	246897774	246898493
1	247055067	247055786
1	247171897	247172616
1	247486318	247487037
1	247567691	247568410
1	247614257	247614976
1	247867753	247868472
1	247875055	247875774
1	248018066	248018785
2	189458	190177
2	367376	368095
2	454500	455219
2	547761	548480
2	706040	706759
2	845804	846523
2	1020381	1021100
2	1149735	1150454
2	1216034	1216753
2	1925633	1926352
2	2042989	2043708
2	2162716	2163435
2	2371821	2372540
2	2713948	2714667
2	2749160	2749879
2	2832671	2833390
2	2837910	2838629
2	2839234	2839953
2	2870945	2871664
2	2894833	2895552
2	3011930	3012649
2	3079801	3080520
2	3759470	3760189
2	4031456	4032175
2	4034108	4034827
2	4141899	4142618
2	4591681	4592400
2	4608338	4609057
2	4662296	4663015
2	4666304	4667023
2	4725871	4726590
2	4906707	4907426
2	4948333	4949052
2	5181013	5181732
2	5516923	5517642
2	5617321	5618040
2	5837670	5838389
2	5850404	5851123
2	5889811	5890530
2	5989176	5989895
2	6065393	6066112
2	6084556	6085275
2	6310520	6311239
2	6555372	6556091
2	6717212	6717931
2	6773560	6774279
2	6787513	6788232
2	6788281	6789000
2	6937233	6937952
2	7096629	7097348
2	7111377	7112096
2	7111539	7112258
2	7248059	7248778
2	7387087	7387806
2	7405707	7406426
2	7439030	7439749
2	7516871	7517590
2	7567307	7568026
2	7764784	7765503
2	7829046	7829765
2	7967915	7968634
2	7975973	7976692
2	8520261	8520980
2	8596514	8597233
2	8707042	8707761
2	9683336	9684055
2	9735706	9736425
2	9954408	9955127
2	10097867	10098586
2	10124296	10125015
2	10193832	10194551
2	10871225	10871944
2	11189489	11190208
2	11530356	11531075
2	11663989	11664708
2	11768512	11769231
2	11786879	11787598
2	12273662	12274381
2	12578819	12579538
2	12775943	12776662
2	12787553	12788272
2	12828613	12829332
2	13035614	13036333
2	13288658	13289377
2	13651649	13652368
2	14020698	14021417
2	14120029	14120748
2	14355361	14356080
2	14433182	14433901
2	14681414	14682133
2	14685792	14686511
2	15808575	15809294
2	16107763	16108482
2	16194670	16195389
2	16630424	16631143
2	16815532	16816251
2	17246774	17247493
2	17425674	17426393
2	18117570	18118289
2	18121838	18122557
2	18234086	18234805
2	18276545	18277264
2	18497483	18498202
2	18715841	18716560
2	19184636	19185355
2	19301462	19302181
2	19616942	19617661
2	19742726	19743445
2	19869783	19870502
2	19951142	19951861
2	20090379	20091098
2	20683960	20684679
2	21061574	21062293
2	21123301	21124020
2	21141455	21142174
2	21676260	21676979
2	21768381	21769100
2	22033167	22033886
2	22189628	22190347
2	22406974	22407693
2	22471759	22472478
2	22752865	22753584
2	22820701	22821420
2	23050063	23050782
2	23148051	23148770
2	23215902	23216621
2	23581954	23582673
2	23584205	23584924
2	23594992	23595711
2	23716334	23717053
2	25359062	25359781
2	26190936	26191655
2	26743296	26744015
2	27212166	27212885
2	27630780	27631499
2	27844241	27844960
2	28341793	28342512
2	28755895	28756614
2	28778868	28779587
2	28854598	28855317
2	28906284	28907003
2	28951338	28952057
2	29259725	29260444
2	29454341	29455060
2	29533422	29534141
2	29591409	29592128
2	29867899	29868618
2	29999921	30000640
2	30299676	30300395
2	30973465	30974184
2	31431365	31432084
2	31609633	31610352
2	31628345	31629064
2	32975727	32976446
2	33090307	33091026
2	33663990	33664709
2	33897094	33897813
2	34137543	34138262
2	34427273	34427992
2	35326067	35326786
2	35908640	35909359
2	36132583	36133302
2	36282728	36283447
2	36398544	36399263
2	36612120	36612839
2	36964391	36965110
2	36976756	36977475
2	37029213	37029932
2	37739152	37739871
2	37842659	37843378
2	38004688	38005407
2	38066323	38067042
2	38336370	38337089
2	38459570	38460289
2	38517155	38517874
2	38673178	38673897
2	38956587	38957306
2	39583086	39583805
2	39674979	39675698
2	39929917	39930636
2	40275173	40275892
2	40288907	40289626
2	40407507	40408226
2	40453434	40454153
2	40484714	40485433
2	40783046	40783765
2	41304933	41305652
2	41640997	41641716
2	41646835	41647554
2	41934442	41935161
2	42004142	42004861
2	42100178	42100897
2	42248353	42249072
2	42354486	42355205
2	42978076	42978795
2	43073865	43074584
2	43496626	43497345
2	43779305	43780024
2	43858730	43859449
2	43930349	43931068
2	43995131	43995850
2	44039479	44040198
2	44204357	44205076
2	44211648	44212367
2	44547214	44547933
2	44726279	44726998
2	45099390	45100109
2	45199649	45200368
2	45253788	45254507
2	45297725	45298444
2	45571343	45572062
2	45616741	45617460
2	45898170	45898889
2	45902094	45902813
2	45953964	45954683
2	45997051	45997770
2	46168569	46169288
2	46234999	46235718
2	46344985	46345704
2	46346356	46347075
2	46479478	46480197
2	46565162	46565881
2	46738797	46739516
2	47671205	47671924
2	47808070	47808789
2	48520179	48520898
2	48623647	48624366
2	49090034	49090753
2	49421211	49421930
2	49479946	49480665
2	49644440	49645159
2	49748678	49749397
2	49989657	49990376
2	50361028	50361747
2	50373915	50374634
2	50443240	50443959
2	50610716	50611435
2	50704738	50705457
2	50750068	50750787
2	51016751	51017470
2	51452719	51453438
2	52260392	52261111
2	52343326	52344045
2	53051113	53051832
2	53342295	53343014
2	53358593	53359312
2	53532096	53532815
2	53540240	53540959
2	53858657	53859376
2	53992499	53993218
2	54480009	54480728
2	54583057	54583776
2	54768308	54769027
2	55062753	55063472
2	55354106	55354825
2	55680136	55680855
2	55793116	55793835
2	55872178	55872897
2	55941080	55941799
2	56198041	56198760
2	56376204	56376923
2	56490320	56491039
2	57077385	57078104
2	57618086	57618805
2	58169134	58169853
2	58388336	58389055
2	58498121	58498840
2	58580658	58581377
2	58597597	58598316
2	58980965	58981684
2	59042487	59043206
2	59047613	59048332
2	59137640	59138359
2	59178327	59179046
2	59260044	59260763
2	59517626	59518345
2	59580376	59581095
2	59955256	59955975
2	60025603	60026322
2	60094346	60095065
2	60097956	60098675
2	60216733	60217452
2	60333372	60334091
2	60409019	60409738
2	60679582	60680301
2	61448416	61449135
2	62064044	62064763
2	62136476	62137195
2	62679222	62679941
2	62774055	62774774
2	63186754	63187473
2	64412861	64413580
2	64495267	64495986
2	64549972	64550691
2	64559261	64559980
2	64828791	64829510
2	64829105	64829824
2	64917710	64918429
2	65105990	65106709
2	65287536	65288255
2	65705965	65706684
2	66162052	66162771
2	66410586	66411305
2	66430251	66430970
2	66463990	66464709
2	66749250	66749969
2	66897907	66898626
2	67007951	67008670
2	67262286	67263005
2	67484668	67485387
2	67630116	67630835
2	67739243	67739962
2	67746532	67747251
2	67747175	67747894
2	67776158	67776877
2	67827718	67828437
2	67869865	67870584
2	67951501	67952220
2	68018982	68019701
2	68100341	68101060
2	68165720	68166439
2	68181463	68182182
2	68235436	68236155
2	68559090	68559809
2	69154966	69155685
2	69259997	69260716
2	69430909	69431628
2	69438628	69439347
2	70202253	70202972
2	70684091	70684810
2	70732492	70733211
2	70757763	70758482
2	70874612	70875331
2	70891155	70891874
2	71036122	71036841
2	71152490	71153209
2	71402924	71403643
2	71929415	71930134
2	72253912	72254631
2	72257498	72258217
2	73466232	73466951
2	74690018	74690737
2	75093765	75094484
2	75095449	75096168
2	75268704	75269423
2	75286746	75287465
2	75401705	75402424
2	75559346	75560065
2	75679847	75680566
2	75710385	75711104
2	75744721	75745440
2	75767738	75768457
2	76865225	76865944
2	76942450	76943169
2	76948673	76949392
2	77493347	77494066
2	78295785	78296504
2	79142027	79142746
2	79476314	79477033
2	79497469	79498188
2	79528334	79529053
2	79608531	79609250
2	79623286	79624005
2	79651992	79652711
2	79655157	79655876
2	79781385	79782104
2	79840088	79840807
2	79967715	79968434
2	79979607	79980326
2	80002163	80002882
2	80187609	80188328
2	80197078	80197797
2	80266537	80267256
2	80477914	80478633
2	80488414	80489133
2	80600145	80600864
2	80668362	80669081
2	80849451	80850170
2	80914754	80915473
2	81061141	81061860
2	81583197	81583916
2	82716795	82717514
2	85046115	85046834
2	85077414	85078133
2	85127026	85127745
2	85288212	85288931
2	85374922	85375641
2	85491005	85491724
2	85700564	85701283
2	85815974	85816693
2	85893381	85894100
2	86014761	86015480
2	86306768	86307487
2	86332833	86333552
2	86342956	86343675
2	86365247	86365966
2	86683282	86684001
2	86978535	86979254
2	88389872	88390591
2	88423456	88424175
2	88976746	88977465
2	96195370	96196089
2	96671641	96672360
2	98017444	98018163
2	98372646	98373365
2	98735865	98736584
2	98897860	98898579
2	98898312	98899031
2	98989340	98990059
2	99135378	99136097
2	99361821	99362540
2	100171721	100172440
2	100295278	100295997
2	100440989	100441708
2	100459075	100459794
2	100739610	100740329
2	101008495	101009214
2	101088480	101089199
2	101244398	101245117
2	101423417	101424136
2	101451459	101452178
2	101571345	101572064
2	101698422	101699141
2	102670707	102671426
2	102865913	102866632
2	102955108	102955827
2	103067463	103068182
2	103093853	103094572
2	103552773	103553492
2	103585062	103585781
2	103608536	103609255
2	104511866	104512585
2	104959401	104960120
2	104982907	104983626
2	105612979	105613698
2	106020581	106021300
2	106024091	106024810
2	106163164	106163883
2	106258664	106259383
2	106270143	106270862
2	106584194	106584913
2	106587188	106587907
2	106644412	106645131
2	107430866	107431585
2	107481657	107482376
2	107498681	107499400
2	107677330	107678049
2	107679114	107679833
2	107789543	107790262
2	108019162	108019881
2	108113725	108114444
2	109661683	109662402
2	109896645	109897364
2	109937380	109938099
2	111468778	111469497
2	111578221	111578940
2	111615781	111616500
2	111801042	111801761
2	111907331	111908050
2	111948449	111949168
2	112966149	112966868
2	113245083	113245802
2	113605597	113606316
2	113827499	113828218
2	114074250	114074969
2	114745374	114746093
2	115827428	115828147
2	115848421	115849140
2	115893596	115894315
2	115961442	115962161
2	116029406	116030125
2	116332293	116333012
2	117721413	117722132
2	117848281	117849000
2	118273642	118274361
2	119091984	119092703
2	119182557	119183276
2	119234976	119235695
2	119560484	119561203
2	119665551	119666270
2	119825733	119826452
2	119844674	119845393
2	121040987	121041706
2	121939641	121940360
2	123139519	123140238
2	123357347	123358066
2	123818613	123819332
2	124279108	124279827
2	124913157	124913876
2	124982117	124982836
2	125080506	125081225
2	125532911	125533630
2	125925770	125926489
2	126041166	126041885
2	126115002	126115721
2	126192535	126193254
2	126461047	126461766
2	126503375	126504094
2	126986511	126987230
2	127125864	127126583
2	127457108	127457827
2	127516146	127516865
2	127904644	127905363
2	129489196	129489915
2	129700257	129700976
2	129784363	129785082
2	130130288	130131007
2	130533921	130534640
2	130643252	130643971
2	130645813	130646532
2	130682984	130683703
2	131109737	131110456
2	131134489	131135208
2	131654096	131654815
2	131888819	131889538
2	133342298	133343017
2	133362583	133363302
2	133431866	133432585
2	133434471	133435190
2	133439867	133440586
2	133478617	133479336
2	133951680	133952399
2	134228648	134229367
2	134243351	134244070
2	134431083	134431802
2	134730699	134731418
2	134813426	134814145
2	134911754	134912473
2	134983410	134984129
2	134983710	134984429
2	135022546	135023265
2	135079779	135080498
2	135211969	135212688
2	135744769	135745488
2	135803065	135803784
2	137611869	137612588
2	137657752	137658471
2	138116176	138116895
2	138201225	138201944
2	138600441	138601160
2	138777506	138778225
2	139574984	139575703
2	139659489	139660208
2	140714100	140714819
2	140714254	140714973
2	140847200	140847919
2	141023283	141024002
2	141285044	141285763
2	141349740	141350459
2	141717286	141718005
2	141778342	141779061
2	142076948	142077667
2	142077643	142078362
2	142077866	142078585
2	142233805	142234524
2	142245587	142246306
2	142290327	142291046
2	142468082	142468801
2	142485893	142486612
2	142494659	142495378
2	142636100	142636819
2	142927878	142928597
2	142993968	142994687
2	142999034	142999753
2	143674466	143675185
2	143925157	143925876
2	144624289	144625008
2	144992841	144993560
2	145416040	145416759
2	146088907	146089626
2	146490201	146490920
2	146931190	146931909
2	146999855	147000574
2	147890620	147891339
2	148104357	148105076
2	148283549	148284268
2	151218729	151219448
2	151324040	151324759
2	152226210	152226929
2	152719670	152720389
2	152818902	152819621
2	152998107	152998826
2	153241819	153242538
2	153248044	153248763
2	153381438	153382157
2	153473434	153474153
2	153956704	153957423
2	154436316	154437035
2	154518917	154519636
2	155188163	155188882
2	155303810	155304529
2	155362062	155362781
2	155406265	155406984
2	155663363	155664082
2	155702906	155703625
2	156183129	156183848
2	156404421	156405140
2	156470436	156471155
2	156784778	156785497
2	156893517	156894236
2	157094488	157095207
2	157530269	157530988
2	157564832	157565551
2	157588069	157588788
2	158004560	158005279
2	158991165	158991884
2	159196411	159197130
2	159563916	159564635
2	159586361	159587080
2	159670089	159670808
2	159955215	159955934
2	159964506	159965225
2	160005783	160006502
2	160065456	160066175
2	160268643	160269362
2	160890649	160891368
2	161131402	161132121
2	161670400	161671119
2	161844524	161845243
2	162263855	162264574
2	163128464	163129183
2	163207120	163207839
2	163320654	163321373
2	163831000	163831719
2	164388279	164388998
2	164468000	164468719
2	164614387	164615106
2	164752102	164752821
2	165090103	165090822
2	165694376	165695095
2	165773595	165774314
2	165785226	165785945
2	165812068	165812787
2	166028898	166029617
2	166380155	166380874
2	166715497	166716216
2	166897889	166898608
2	167771933	167772652
2	168001110	168001829
2	168207541	168208260
2	168434435	168435154
2	168539309	168540028
2	168627817	168628536
2	168686793	168687512
2	168737388	168738107
2	168975427	168976146
2	169285128	169285847
2	169351900	169352619
2	169370654	169371373
2	169439488	169440207
2	169516521	169517240
2	170024980	170025699
2	170050807	170051526
2	170622740	170623459
2	171101149	171101868
2	171172901	171173620
2	171182650	171183369
2	171666637	171667356
2	172172504	172173223
2	172272330	172273049
2	172819955	172820674
2	173126130	173126849
2	173173282	173174001
2	173261979	173262698
2	173686438	173687157
2	173849449	173850168
2	173864924	173865643
2	173867448	173868167
2	174232681	174233400
2	174266988	174267707
2	174350873	174351592
2	174578162	174578881
2	174677573	174678292
2	174707839	174708558
2	175295241	175295960
2	175446853	175447572
2	175600531	175601250
2	176037122	176037841
2	176618604	176619323
2	177111459	177112178
2	177210534	177211253
2	177257844	177258563
2	177340453	177341172
2	177632832	177633551
2	177677127	177677846
2	177741764	177742483
2	178012086	178012805
2	178117792	178118511
2	178398119	178398838
2	178679316	178680035
2	179025941	179026660
2	179097123	179097842
2	179127469	179128188
2	179182335	179183054
2	179184691	179185410
2	179203437	179204156
2	179260022	179260741
2	179469026	179469745
2	179569040	179569759
2	179794087	179794806
2	180272126	180272845
2	180506200	180506919
2	180520270	180520989
2	180583881	180584600
2	180783312	180784031
2	180792690	180793409
2	180975558	180976277
2	181386905	181387624
2	181584860	181585579
2	182018194	182018913
2	182123481	182124200
2	182349049	182349768
2	182381956	182382675
2	182572142	182572861
2	182900897	182901616
2	182978716	182979435
2	183023032	183023751
2	183462402	183463121
2	183508336	183509055
2	183698331	183699050
2	183899914	183900633
2	184022128	184022847
2	184353095	184353814
2	184674042	184674761
2	185186784	185187503
2	185198096	185198815
2	185428586	185429305
2	185930299	185931018
2	188255798	188256517
2	188308280	188308999
2	191668479	191669198
2	191748675	191749394
2	192014712	192015431
2	192236260	192236979
2	192406524	192407243
2	192635803	192636522
2	192848767	192849486
2	193002672	193003391
2	194970334	194971053
2	195365724	195366443
2	195871459	195872178
2	196329862	196330581
2	196527741	196528460
2	196791432	196792151
2	196945025	196945744
2	197081483	197082202
2	197255126	197255845
2	197332273	197332992
2	198119837	198120556
2	198129010	198129729
2	198369010	198369729
2	198497152	198497871
2	199085301	199086020
2	199348605	199349324
2	199557819	199558538
2	200558668	200559387
2	200710346	200711065
2	200793424	200794143
2	200853065	200853784
2	201302650	201303369
2	201318661	201319380
2	201350594	201351313
2	201608474	201609193
2	201610224	201610943
2	201643124	201643843
2	201738967	201739686
2	202102325	202103044
2	202153840	202154559
2	202554772	202555491
2	202558055	202558774
2	203469228	203469947
2	203527619	203528338
2	204454811	204455530
2	205153467	205154186
2	205212269	205212988
2	205258492	205259211
2	205355532	205356251
2	205793714	205794433
2	205923917	205924636
2	205968860	205969579
2	206057990	206058709
2	206144473	206145192
2	206257434	206258153
2	206432693	206433412
2	206545790	206546509
2	206613731	206614450
2	206775170	206775889
2	206870424	206871143
2	207058162	207058881
2	207169371	207170090
2	207373468	207374187
2	207956991	207957710
2	209349768	209350487
2	209840608	209841327
2	210245562	210246281
2	210373692	210374411
2	210532347	210533066
2	210555416	210556135
2	210600849	210601568
2	210808545	210809264
2	211074549	211075268
2	211168803	211169522
2	211430678	211431397
2	211529490	211530209
2	212021395	212022114
2	212417750	212418469
2	212541017	212541736
2	213394245	213394964
2	213597413	213598132
2	213602478	213603197
2	213775989	213776708
2	213879047	213879766
2	214116943	214117662
2	214512787	214513506
2	215361320	215362039
2	215405765	215406484
2	215590222	215590941
2	216838339	216839058
2	216871120	216871839
2	216880407	216881126
2	217312684	217313403
2	217533884	217534603
2	217550169	217550888
2	217619240	217619959
2	217840260	217840979
2	217899936	217900655
2	217974084	217974803
2	218139544	218140263
2	218174846	218175565
2	218232316	218233035
2	218295643	218296362
2	218326441	218327160
2	219562315	219563034
2	220212359	220213078
2	220711685	220712404
2	220768519	220769238
2	220771215	220771934
2	220780646	220781365
2	220863020	220863739
2	221133919	221134638
2	221289867	221290586
2	221654565	221655284
2	222066790	222067509
2	222199244	222199963
2	222229026	222229745
2	222337266	222337985
2	222378634	222379353
2	222471156	222471875
2	222584851	222585570
2	222682576	222683295
2	222856753	222857472
2	222994795	222995514
2	223090419	223091138
2	223131265	223131984
2	223147932	223148651
2	223203189	223203908
2	223427494	223428213
2	223875279	223875998
2	224300537	224301256
2	224417892	224418611
2	224892585	224893304
2	224925057	224925776
2	225192289	225193008
2	225234111	225234830
2	225347214	225347933
2	225634333	225635052
2	225865548	225866267
2	227258907	227259626
2	227377197	227377916
2	227409989	227410708
2	227450167	227450886
2	227518088	227518807
2	227563665	227564384
2	227589420	227590139
2	227653588	227654307
2	227898074	227898793
2	228112815	228113534
2	228166654	228167373
2	228525740	228526459
2	228725504	228726223
2	228753092	228753811
2	229405807	229406526
2	229477987	229478706
2	229907885	229908604
2	229969438	229970157
2	230080683	230081402
2	230146231	230146950
2	230224109	230224828
2	230385683	230386402
2	230400722	230401441
2	230631908	230632627
2	230995087	230995806
2	231026802	231027521
2	231041916	231042635
2	231050355	231051074
2	231258090	231258809
2	231443068	231443787
2	231876847	231877566
2	232630099	232630818
2	233446208	233446927
2	234190380	234191099
2	234244035	234244754
2	234512616	234513335
2	234620797	234621516
2	234712561	234713280
2	234721084	234721803
2	234760865	234761584
2	234767707	234768426
2	234825199	234825918
2	234979810	234980529
2	235007131	235007850
2	235209056	235209775
2	235214773	235215492
2	235378371	235379090
2	235501985	235502704
2	235918144	235918863
2	236085072	236085791
2	236430550	236431269
2	236737791	236738510
2	237481609	237482328
2	237706579	237707298
2	237758346	237759065
2	237802940	237803659
2	237848152	237848871
2	238118087	238118806
2	238255326	238256045
2	238336442	238337161
2	238412978	238413697
2	239721894	239722613
2	240318395	240319114
2	240518411	240519130
2	240971760	240972479
2	241261297	241262016
2	242028381	242029100
2	242173556	242174275
3	236399	237118
3	316057	316776
3	342662	343381
3	377709	378428
3	1169136	1169855
3	1314839	1315558
3	1424808	1425527
3	1493904	1494623
3	1655624	1656343
3	2198313	2199032
3	2482945	2483664
3	2638786	2639505
3	2687167	2687886
3	2924326	2925045
3	2993006	2993725
3	3000548	3001267
3	3049160	3049879
3	3094090	3094809
3	3108351	3109070
3	3401868	3402587
3	3475499	3476218
3	3545056	3545775
3	3669026	3669745
3	3687467	3688186
3	3967107	3967826
3	4022872	4023591
3	4165373	4166092
3	4273129	4273848
3	4451060	4451779
3	4565199	4565918
3	4609288	4610007
3	4665205	4665924
3	4751442	4752161
3	4765512	4766231
3	4806661	4807380
3	4818432	4819151
3	4874138	4874857
3	4945668	4946387
3	5026538	5027257
3	5040855	5041574
3	5772785	5773504
3	5831796	5832515
3	6205475	6206194
3	6224512	6225231
3	6461706	6462425
3	6487742	6488461
3	6603706	6604425
3	6773607	6774326
3	7011174	7011893
3	7025981	7026700
3	7116336	7117055
3	7153292	7154011
3	7187646	7188365
3	7320154	7320873
3	7748483	7749202
3	7839117	7839836
3	7966581	7967300
3	8199911	8200630
3	8259131	8259850
3	8324229	8324948
3	8342221	8342940
3	8501526	8502245
3	8509137	8509856
3	8600974	8601693
3	8956058	8956777
3	9094171	9094890
3	9265260	9265979
3	9388863	9389582
3	9420664	9421383
3	10622581	10623300
3	10945014	10945733
3	11039600	11040319
3	11045467	11046186
3	11618322	11619041
3	11670213	11670932
3	11888196	11888915
3	12344276	12344995
3	12424433	12425152
3	12432938	12433657
3	12481015	12481734
3	12623710	12624429
3	13164423	13165142
3	14184309	14185028
3	14253227	14253946
3	14582309	14583028
3	14755212	14755931
3	14815393	14816112
3	14980902	14981621
3	15202812	15203531
3	15216069	15216788
3	15504378	15505097
3	15947968	15948687
3	15978595	15979314
3	15980946	15981665
3	16408418	16409137
3	16517910	16518629
3	16572780	16573499
3	17178419	17179138
3	18585005	18585724
3	18847351	18848070
3	18959596	18960315
3	19440766	19441485
3	19567649	19568368
3	19787853	19788572
3	20042474	20043193
[truncated: 9,503 more rows]

## Sheet: TableS9
Supplemental Table S9: MSY variant sites and genotypes in bonobos according to human genome reference (GRCh37/hg19)
CHROM	POS	Branch	REF	ALT	Ancestral	PPA_Bono	PPA_PPA2	PPA_Masikini	PPA_Desmond
Y	2652464	1 to PPA_Desmond	T	G	T	T	T	T	G
Y	2654025	1 to PPA_Desmond	C	G	C	C	C	C	G
Y	2654508	1 to PPA_Desmond	C	G	C	C	C	C	G
Y	2654626	1 to 2	C	G	C	G	G	G	C
Y	2654780	1 to 2	C	G	C	G	G	G	C
Y	2655052	1 to 2	T	C	T	C	C	C	T
Y	2655978	1 to PPA_Desmond	G	A	G	G	G	G	A
Y	2656106	1 to PPA_Desmond	G	C	G	G	G	G	C
Y	2658598	2 to PPA_Bono	G	T	G	T	G	G	G
Y	2659211	1 to PPA_Desmond	G	C	G	G	G	G	C
Y	2661356	1 to PPA_Desmond	A	G	A	A	A	A	G
Y	2661579	1 to PPA_Desmond	G	A	G	G	G	G	A
Y	2662017	1 to PPA_Desmond	C	T	C	C	C	C	T
Y	2662026	1 to 2	C	G	C	G	G	G	C
Y	2662151	1 to PPA_Desmond	A	G	A	A	A	A	G
Y	2664072	1 to PPA_Desmond	T	C	T	T	T	T	C
Y	2667603	2 to PPA_Bono	A	C	A	C	A	A	A
Y	2686315	2 to 3	T	C	T	T	C	C	T
Y	2686736	1 to PPA_Desmond	C	T	C	C	C	C	T
Y	2692534	1 to 2	A	G	A	G	G	G	A
Y	2696320	1 to PPA_Desmond	T	C	T	T	T	T	C
Y	2706609	1 to PPA_Desmond	A	G	A	A	A	A	G
Y	2709063	1 to 2	T	C	T	C	C	C	T
Y	2709348	1 to PPA_Desmond	C	T	C	C	C	C	T
Y	2709912	2 to 3	G	A	G	G	A	A	G
Y	2710080	1 to 2	G	C	G	C	C	C	G
Y	2711893	1 to 2	G	C	G	C	C	C	G
Y	2712873	1 to PPA_Desmond	G	A	G	G	G	G	A
Y	2714446	2 to PPA_Bono	G	A	G	A	G	G	G
Y	2715444	1 to PPA_Desmond	G	A	G	G	G	G	A
Y	2716972	1 to 2	A	G	A	G	G	G	A
Y	2716979	1 to 2	T	C	T	C	C	C	T
Y	2718686	1 to PPA_Desmond	T	C	T	T	T	T	C
Y	2723390	1 to PPA_Desmond	C	A,G	A	A	A	A	G
Y	2723768	1 to PPA_Desmond	T	C	T	T	T	T	C
Y	2727882	1 to 2	C	T	C	T	T	T	C
Y	2729626	1 to PPA_Desmond	C	A	C	C	C	C	A
Y	2730920	2 to 3	G	A	G	G	A	A	G
Y	2731248	1 to PPA_Desmond	C	T	C	C	C	C	T
Y	2732173	1 to 2	A	G	A	G	G	G	A
Y	2732294	1 to PPA_Desmond	A	G	A	A	A	A	G
Y	2732607	1 to PPA_Desmond	A	G	A	A	A	A	G
Y	2732664	1 to PPA_Desmond	C	G	C	C	C	C	G
Y	2733344	1 to 2	G	C	G	C	C	C	G
Y	2734247	1 to PPA_Desmond	A	G	A	A	A	A	G
Y	2737327	1 to 2	T	C	T	C	C	C	T
Y	2737811	1 to 2	G	A	G	A	A	A	G
Y	2739525	1 to 2	A	G	A	G	G	G	A
Y	2742733	2 to 3	C	T	C	C	T	T	C
Y	2743040	1 to PPA_Desmond	G	A	G	G	G	G	A
Y	2746024	1 to PPA_Desmond	T	C	T	T	T	T	C
Y	2747302	1 to 2	T	C	T	C	C	C	T
Y	2751827	1 to PPA_Desmond	T	C	T	T	T	T	C
Y	2751845	1 to PPA_Desmond	C	G	C	C	C	C	G
Y	2756946	1 to 2	A	G	A	G	G	G	A
Y	2757048	1 to 2	T	C	T	C	C	C	T
Y	2757186	1 to PPA_Desmond	C	A	C	C	C	C	A
Y	2763875	1 to 2	G	C	G	C	C	C	G
Y	2767492	1 to PPA_Desmond	C	T	C	C	C	C	T
Y	2795706	1 to 2	C	T	C	T	T	T	C
Y	2797436	1 to PPA_Desmond	G	A	G	G	G	G	A
Y	2798178	1 to 2	C	T	C	T	T	T	C
Y	2805524	1 to PPA_Desmond	T	G	T	T	T	T	G
Y	2805603	1 to 2	G	T	G	T	T	T	G
Y	2805884	1 to PPA_Desmond	C	A	C	C	C	C	A
Y	2806899	1 to PPA_Desmond	G	A	G	G	G	G	A
Y	2808750	1 to 2	G	T	G	T	T	T	G
Y	2811169	1 to 2	T	C	T	C	C	C	T
Y	2812705	1 to PPA_Desmond	A	G	A	A	A	A	G
Y	2815014	1 to PPA_Desmond	C	T	T	T	T	T	C
Y	2815463	1 to PPA_Desmond	G	A	G	G	G	G	A
Y	2816851	1 to 2	T	C	T	C	C	C	T
Y	2816868	1 to PPA_Desmond	T	C	T	T	T	T	C
Y	2816906	1 to 2	A	G	A	G	G	G	A
Y	2817539	1 to 2	G	T	G	T	T	T	G
Y	2826242	1 to 2	C	T	C	T	T	T	C
Y	2826479	1 to 2	G	A	G	A	A	A	G
Y	2829667	1 to PPA_Desmond	A	G	A	A	A	A	G
Y	2830314	1 to PPA_Desmond	C	G	C	C	C	C	G
Y	2830675	1 to 2	A	G	A	G	G	G	A
Y	2832665	2 to 3	A	G	A	A	G	G	A
Y	2837291	2 to PPA_Bono	G	C	G	C	G	G	G
Y	2837327	1 to 2	G	C	G	C	C	C	G
Y	2838712	1 to 2	A	G	A	G	G	G	A
Y	2839051	1 to 2	C	T	C	T	T	T	C
Y	2842047	1 to PPA_Desmond	A	C	A	A	A	A	C
Y	2842158	1 to 2	A	G	A	G	G	G	A
Y	2845743	1 to PPA_Desmond	A	G	A	A	A	A	G
Y	2847428	1 to 2	A	G	A	G	G	G	A
Y	2848101	1 to 2	T	A	T	A	A	A	T
Y	2849899	2 to 3	T	C	T	T	C	C	T
Y	2851542	1 to 2	C	T	C	T	T	T	C
Y	2851854	1 to 2	G	A	G	A	A	A	G
Y	2851855	1 to 2	C	A	C	A	A	A	C
Y	2866967	1 to PPA_Desmond	G	A	G	G	G	G	A
Y	2867103	1 to PPA_Desmond	A	G	A	A	A	A	G
Y	2879511	1 to 2	G	C	G	C	C	C	G
Y	2880104	1 to PPA_Desmond	G	A	G	G	G	G	A
Y	2880317	1 to 2	C	T	T	C	C	C	T
Y	2882015	1 to 2	C	T	C	T	T	T	C
Y	2886311	1 to 2	C	G,A	A	G	G	G	A
Y	2888179	2 to 3	G	C	G	G	C	C	G
Y	2888304	1 to PPA_Desmond	G	C	G	G	G	G	C
Y	2890153	1 to 2	C	T	C	T	T	T	C
Y	2903811	1 to PPA_Desmond	C	T	C	C	C	C	T
Y	2904251	2 to PPA_Bono	A	C	A	C	A	A	A
Y	2908884	1 to PPA_Desmond	G	A	G	G	G	G	A
Y	2908921	1 to PPA_Desmond	T	G	T	T	T	T	G
Y	2909211	1 to PPA_Desmond	G	C	G	G	G	G	C
Y	2911223	1 to PPA_Desmond	G	C	G	G	G	G	C
Y	2913346	1 to PPA_Desmond	C	G	C	C	C	C	G
Y	2913541	1 to PPA_Desmond	G	C	G	G	G	G	C
Y	2914122	1 to PPA_Desmond	G	C	G	G	G	G	C
Y	2914125	1 to 2	C	T	C	T	T	T	C
Y	2914256	1 to 2	C	A	C	A	A	A	C
Y	2914305	2 to PPA_Bono	T	C	T	C	T	T	T
Y	2914497	1 to PPA_Desmond	G	C	G	G	G	G	C
Y	6636057	1 to PPA_Desmond	T	C	T	T	T	T	C
Y	6651339	1 to PPA_Desmond	C	T	C	C	C	C	T
Y	6655120	2 to 3	A	C	A	A	C	C	A
Y	6655399	1 to PPA_Desmond	G	T	G	G	G	G	T
Y	6656105	1 to PPA_Desmond	T	G	T	T	T	T	G
Y	6673896	2 to PPA_Bono	G	A	G	A	G	G	G
Y	6675158	1 to 2	A	G	A	G	G	G	A
Y	6676815	1 to PPA_Desmond	C	A	C	C	C	C	A
Y	6678345	1 to PPA_Desmond	G	T	G	G	G	G	T
Y	6680117	1 to 2	C	A	C	A	A	A	C
Y	6699206	1 to PPA_Desmond	T	C	T	T	T	T	C
Y	6700215	1 to PPA_Desmond	T	C	T	T	T	T	C
Y	6700608	1 to PPA_Desmond	G	A	G	G	G	G	A
Y	6700799	1 to PPA_Desmond	C	T	C	C	C	C	T
Y	6701364	1 to PPA_Desmond	A	T,G	T	T	T	T	G
Y	6701367	1 to PPA_Desmond	G	A	G	G	G	G	A
Y	6702357	1 to PPA_Desmond	C	T	C	C	C	C	T
Y	6702528	1 to PPA_Desmond	G	A	G	G	G	G	A
Y	6702820	1 to PPA_Desmond	G	A	G	G	G	G	A
Y	6702922	1 to PPA_Desmond	G	A	G	G	G	G	A
Y	6702933	1 to 2	G	A	G	A	A	A	G
Y	6704647	1 to 2	C	T,G	G	T	T	T	G
Y	6704876	1 to PPA_Desmond	G	C	G	G	G	G	C
Y	6716947	1 to PPA_Desmond	A	G	A	A	A	A	G
Y	6717463	1 to 2	T	C	T	C	C	C	T
Y	6734096	1 to 2	G	A	G	A	A	A	G
Y	6735150	1 to PPA_Desmond	C	T	C	C	C	C	T
Y	6739091	1 to PPA_Desmond	C	T	C	C	C	C	T
Y	6739994	1 to 2	C	T	C	T	T	T	C
Y	6740803	1 to 2	C	G	C	G	G	G	C
Y	6740856	1 to 2	A	G	A	G	G	G	A
Y	6742693	2 to PPA_Bono	T	C	T	C	T	T	T
Y	6743153	1 to 2	C	A	C	A	A	A	C
Y	6743939	2 to PPA_Bono	G	T	T	T	G	G	G
Y	6758842	1 to PPA_Desmond	C	G	C	C	C	C	G
Y	6758944	1 to PPA_Desmond	T	C	T	T	T	T	C
Y	6764400	1 to 2	G	A	G	A	A	A	G
Y	6765223	1 to PPA_Desmond	C	T	C	C	C	C	T
Y	6765312	1 to PPA_Desmond	A	G	A	A	A	A	G
Y	6765370	1 to PPA_Desmond	A	G	A	A	A	A	G
Y	6767635	1 to PPA_Desmond	G	A	G	G	G	G	A
Y	6777388	1 to 2	G	A	A	G	G	G	A
Y	6778238	1 to 2	G	C	G	C	C	C	G
Y	6778411	1 to PPA_Desmond	C	T	C	C	C	C	T
Y	6781090	1 to PPA_Desmond	G	A	G	G	G	G	A
Y	6781168	1 to PPA_Desmond	C	T	C	C	C	C	T
Y	6786549	1 to 2	A	G	A	G	G	G	A
Y	6786617	1 to 2	A	T	A	T	T	T	A
Y	6786963	1 to PPA_Desmond	A	G	A	A	A	A	G
Y	6787449	1 to PPA_Desmond	A	G	A	A	A	A	G
Y	6788590	1 to PPA_Desmond	C	T	C	C	C	C	T
Y	6792257	2 to 3	T	G	T	T	G	G	T
Y	6793273	1 to 2	C	T	C	T	T	T	C
Y	6795977	1 to 2	G	A	G	A	A	A	G
Y	6796067	1 to 2	C	T	T	C	C	C	T
Y	6796096	1 to 2	C	T	C	T	T	T	C
Y	6797666	1 to 2	C	A	C	A	A	A	C
Y	6799535	1 to PPA_Desmond	G	A	G	G	G	G	A
Y	6799875	1 to PPA_Desmond	T	C	T	T	T	T	C
Y	6800655	1 to 2	G	A	G	A	A	A	G
Y	6801515	1 to PPA_Desmond	T	C	T	T	T	T	C
Y	6801637	2 to PPA_Bono	T	C	C	T	C	C	C
Y	6802307	2 to PPA_Bono	T	C	T	C	T	T	T
Y	6808508	1 to 2	C	T	C	T	T	T	C
Y	6808601	2 to PPA_Bono	G	A	G	A	G	G	G
Y	6809517	2 to PPA_Bono	C	T	C	T	C	C	C
Y	6811107	2 to PPA_Bono	A	T	A	T	A	A	A
Y	6811667	3 to PPA_PPA2	G	A	G	G	A	G	G
Y	6814016	1 to PPA_Desmond	T	C	T	T	T	T	C
Y	6816760	1 to PPA_Desmond	G	T	G	G	G	G	T
Y	6817675	1 to PPA_Desmond	A	G	A	A	A	A	G
Y	6818182	1 to PPA_Desmond	T	C	T	T	T	T	C
Y	6837263	1 to PPA_Desmond	C	T	C	C	C	C	T
Y	6837515	1 to 2	C	T	C	T	T	T	C
Y	6839183	1 to 2	G	C	G	C	C	C	G
Y	6841311	1 to PPA_Desmond	C	G	C	C	C	C	G
Y	6842565	1 to 2	G	C	G	C	C	C	G
Y	6842644	1 to 2	G	C	G	C	C	C	G
Y	6845591	1 to PPA_Desmond	G	C	G	G	G	G	C
Y	6845713	1 to PPA_Desmond	A	G	A	A	A	A	G
Y	6846096	1 to 2	C	A	C	A	A	A	C
Y	6846447	1 to PPA_Desmond	C	A	C	C	C	C	A
Y	6846563	1 to PPA_Desmond	A	G	G	G	G	G	A
Y	6847217	1 to PPA_Desmond	A	G	A	A	A	A	G
Y	6847246	1 to 2	T	A	T	A	A	A	T
Y	6848172	1 to 2	G	A	G	A	A	A	G
Y	6850419	2 to PPA_Bono	C	T	C	T	C	C	C
Y	6851098	1 to PPA_Desmond	C	T	C	C	C	C	T
Y	6852274	1 to 2	G	A	G	A	A	A	G
Y	6853161	1 to 2	C	G	C	G	G	G	C
Y	6853593	1 to PPA_Desmond	C	T	C	C	C	C	T
Y	6853892	1 to PPA_Desmond	C	G	C	C	C	C	G
Y	6854469	1 to PPA_Desmond	G	C	G	G	G	G	C
Y	6854506	1 to 2	T	A	T	A	A	A	T
Y	6854585	1 to 2	G	C	G	C	C	C	G
Y	6855834	1 to PPA_Desmond	C	T	C	C	C	C	T
Y	6857221	2 to 3	A	G	A	A	G	G	A
Y	6857807	1 to PPA_Desmond	T	C	T	T	T	T	C
Y	6858451	1 to 2	C	G	C	G	G	G	C
Y	6858660	2 to 3	C	T	C	C	T	T	C
Y	6858841	1 to PPA_Desmond	A	G	A	A	A	A	G
Y	6861584	1 to PPA_Desmond	C	T	C	C	C	C	T
Y	6863211	1 to 2	G	T	T	G	G	G	T
Y	6865567	1 to PPA_Desmond	A	G	A	A	A	A	G
Y	6867649	1 to 2	A	T	A	T	T	T	A
Y	6867954	2 to PPA_Bono	C	T	C	T	C	C	C
Y	6867955	1 to PPA_Desmond	G	A	G	G	G	G	A
Y	6868492	1 to PPA_Desmond	A	T	A	A	A	A	T
Y	6870096	1 to 2	T	C	T	C	C	C	T
Y	6873714	1 to PPA_Desmond	G	A	G	G	G	G	A
Y	6874213	1 to 2	A	G	A	G	G	G	A
Y	6878726	1 to 2	C	T	C	T	T	T	C
Y	6879239	1 to 2	C	T	C	T	T	T	C
Y	6880832	1 to 2	C	T	C	T	T	T	C
Y	6883221	1 to 2	C	T	C	T	T	T	C
Y	6883674	1 to 2	C	G	C	G	G	G	C
Y	6885435	1 to 2	C	A	C	A	A	A	C
Y	6885574	1 to 2	C	G	C	G	G	G	C
Y	6885631	1 to PPA_Desmond	G	A	A	A	A	A	G
Y	6885827	1 to PPA_Desmond	T	C	T	T	T	T	C
Y	6886283	1 to 2	C	T	T	C	C	C	T
Y	6888985	1 to PPA_Desmond	G	A	G	G	G	G	A
Y	6889038	2 to 3	A	G	A	A	G	G	A
Y	6889690	1 to PPA_Desmond	G	A	A	A	A	A	G
Y	6891285	1 to PPA_Desmond	G	A	G	G	G	G	A
Y	6891652	1 to PPA_Desmond	A	T	A	A	A	A	T
Y	6893356	1 to 2	A	T	A	T	T	T	A
Y	6893696	1 to PPA_Desmond	A	G	A	A	A	A	G
Y	6895013	1 to PPA_Desmond	C	T	C	C	C	C	T
Y	6895151	1 to PPA_Desmond	C	G	C	C	C	C	G
Y	6896199	2 to 3	G	A	G	G	A	A	G
Y	6898040	2 to PPA_Bono	A	G	A	G	A	A	A
Y	6904809	1 to PPA_Desmond	G	A	G	G	G	G	A
Y	6904967	1 to 2	T	C	T	C	C	C	T
Y	6906504	1 to PPA_Desmond	T	G	T	T	T	T	G
Y	6907435	1 to PPA_Desmond	G	A	G	G	G	G	A
Y	6907843	1 to 2	A	G,C	C	G	G	G	C
Y	6908382	1 to PPA_Desmond	A	G	A	A	A	A	G
Y	6908479	1 to 2	C	G	C	G	G	G	C
Y	6909081	1 to PPA_Desmond	G	A	G	G	G	G	A
Y	6911195	1 to PPA_Desmond	A	G	A	A	A	A	G
Y	6911933	1 to PPA_Desmond	A	G	A	A	A	A	G
Y	6923586	1 to 2	G	C	G	C	C	C	G
Y	6923618	1 to 2	C	G	C	G	G	G	C
Y	6923755	1 to PPA_Desmond	G	C	G	G	G	G	C
Y	6924129	1 to PPA_Desmond	A	G	A	A	A	A	G
Y	6924483	1 to PPA_Desmond	G	C	G	G	G	G	C
Y	6924794	1 to PPA_Desmond	C	T	C	C	C	C	T
Y	6934236	1 to 2	G	A	G	A	A	A	G
Y	6934566	1 to 2	C	G	C	G	G	G	C
Y	6934908	1 to 2	G	A	G	A	A	A	G
Y	6934960	1 to 2	G	C	G	C	C	C	G
Y	6935155	1 to PPA_Desmond	T	C	T	T	T	T	C
Y	6935738	1 to 2	T	A	T	A	A	A	T
Y	6937082	1 to 2	C	T	C	T	T	T	C
Y	6937474	1 to 2	G	C	G	C	C	C	G
Y	6938172	1 to PPA_Desmond	G	C	G	G	G	G	C
Y	6942276	1 to PPA_Desmond	G	A	G	G	G	G	A
Y	6942279	1 to 2	G	A	A	G	G	G	A
Y	6943831	1 to 2	T	C	T	C	C	C	T
Y	6945826	1 to PPA_Desmond	C	T	C	C	C	C	T
Y	6947022	1 to 2	G	T	G	T	T	T	G
Y	6947229	1 to PPA_Desmond	T	C	T	T	T	T	C
Y	6950453	1 to PPA_Desmond	T	G	T	T	T	T	G
Y	6952073	1 to 2	T	G	T	G	G	G	T
Y	6952167	1 to PPA_Desmond	T	G	T	T	T	T	G
Y	6952256	1 to 2	C	A	C	A	A	A	C
Y	6952542	1 to PPA_Desmond	G	A	G	G	G	G	A
Y	6952638	1 to 2	C	T	C	T	T	T	C
Y	6953083	1 to PPA_Desmond	A	G	A	A	A	A	G
Y	6953123	1 to 2	C	T	C	T	T	T	C
Y	6954101	2 to 3	G	T	G	G	T	T	G
Y	6955299	1 to 2	T	C	C	T	T	T	C
Y	6956867	2 to PPA_Bono	G	A	G	A	G	G	G
Y	6956908	1 to 2	A	G	A	G	G	G	A
Y	6957732	1 to 2	G	A	G	A	A	A	G
Y	6959555	1 to 2	A	G	A	G	G	G	A
Y	6961602	2 to PPA_Bono	A	G	A	G	A	A	A
Y	6963137	1 to 2	G	A	G	A	A	A	G
Y	6963396	2 to PPA_Bono	A	G	A	G	A	A	A
Y	6964332	1 to 2	A	G	A	G	G	G	A
Y	6964363	1 to 2	C	T	C	T	T	T	C
Y	6968359	1 to PPA_Desmond	C	A	C	C	C	C	A
Y	6969465	1 to PPA_Desmond	A	C	A	A	A	A	C
Y	6970495	1 to PPA_Desmond	C	G	C	C	C	C	G
Y	6974106	1 to PPA_Desmond	T	C	T	T	T	T	C
Y	6974847	1 to PPA_Desmond	C	G	C	C	C	C	G
Y	6975317	2 to PPA_Bono	C	T	C	T	C	C	C
Y	6979167	2 to PPA_Bono	C	A	C	A	C	C	C
Y	6979703	1 to 2	A	G	A	G	G	G	A
Y	6979883	1 to 2	T	A	T	A	A	A	T
Y	6985576	1 to 2	G	A	G	A	A	A	G
Y	6988131	1 to PPA_Desmond	A	G	A	A	A	A	G
Y	6989002	1 to PPA_Desmond	G	A	G	G	G	G	A
Y	6990974	1 to PPA_Desmond	G	A	G	G	G	G	A
Y	6991205	1 to 2	G	A	G	A	A	A	G
Y	6996188	1 to PPA_Desmond	A	G	A	A	A	A	G
Y	7009628	1 to PPA_Desmond	T	C	T	T	T	T	C
Y	7010473	1 to PPA_Desmond	G	A	G	G	G	G	A
Y	7018119	1 to PPA_Desmond	G	T	G	G	G	G	T
Y	7018120	1 to PPA_Desmond	C	T	C	C	C	C	T
Y	7019052	2 to 3	A	T	A	A	T	T	A
Y	7030108	1 to PPA_Desmond	C	A,G	A	A	A	A	G
Y	7037349	1 to PPA_Desmond	C	T	T	T	T	T	C
Y	7053432	1 to PPA_Desmond	G	A	G	G	G	G	A
Y	7056543	1 to 2	A	T	A	T	T	T	A
Y	7058088	2 to 3	C	T	C	C	T	T	C
Y	7064514	1 to 2	C	T	C	T	T	T	C
Y	7072836	1 to PPA_Desmond	G	A	G	G	G	G	A
Y	7073762	1 to 2	C	G	C	G	G	G	C
Y	7074070	1 to 2	G	T	G	T	T	T	G
Y	7074188	1 to 2	C	G	C	G	G	G	C
Y	7077638	1 to 2	T	C	T	C	C	C	T
Y	7078842	1 to PPA_Desmond	A	T	A	A	A	A	T
Y	7080050	1 to PPA_Desmond	T	C	T	T	T	T	C
Y	7080216	1 to 2	T	A	T	A	A	A	T
Y	7081391	1 to PPA_Desmond	G	A	G	G	G	G	A
Y	7083577	1 to 2	C	T	C	T	T	T	C
Y	7088051	1 to PPA_Desmond	G	A	G	G	G	G	A
Y	7088074	1 to PPA_Desmond	C	T	C	C	C	C	T
Y	7091248	1 to PPA_Desmond	C	T	C	C	C	C	T
Y	7100748	1 to PPA_Desmond	C	A	C	C	C	C	A
Y	7101025	1 to PPA_Desmond	A	G	G	G	G	G	A
Y	7105202	1 to 2	G	A	G	A	A	A	G
Y	7108451	1 to 2	A	G	A	G	G	G	A
Y	7109110	1 to PPA_Desmond	G	C	G	G	G	G	C
Y	7109707	1 to PPA_Desmond	A	G	A	A	A	A	G
Y	7116687	1 to 2	G	C	G	C	C	C	G
Y	7124660	1 to PPA_Desmond	T	C	T	T	T	T	C
Y	7124860	2 to 3	A	T	A	A	T	T	A
Y	7132968	1 to 2	C	T	C	T	T	T	C
Y	7133130	1 to PPA_Desmond	G	T	T	T	T	T	G
Y	7133448	1 to PPA_Desmond	T	G	T	T	T	T	G
Y	7134181	1 to 2	C	T	T	C	C	C	T
Y	7135150	1 to PPA_Desmond	T	C	T	T	T	T	C
Y	7135179	1 to PPA_Desmond	C	G	C	C	C	C	G
Y	7135225	1 to PPA_Desmond	C	A	C	C	C	C	A
Y	7135718	1 to 2	C	T	C	T	T	T	C
Y	7135820	1 to PPA_Desmond	A	G	A	A	A	A	G
Y	7136704	1 to 2	A	G	A	G	G	G	A
Y	7137938	1 to PPA_Desmond	G	A	G	G	G	G	A
Y	7138297	1 to PPA_Desmond	C	T	C	C	C	C	T
Y	7144166	2 to PPA_Bono	G	C	G	C	G	G	G
Y	7144655	1 to PPA_Desmond	G	A	G	G	G	G	A
Y	7146243	1 to PPA_Desmond	A	G	A	A	A	A	G
Y	7149992	1 to 2	C	T	C	T	T	T	C
Y	7150320	1 to PPA_Desmond	C	T	C	C	C	C	T
Y	7151679	2 to PPA_Bono	C	T	C	T	C	C	C
Y	7151935	1 to 2	C	G	C	G	G	G	C
Y	7152128	1 to 2	G	T	G	T	T	T	G
Y	7153953	1 to PPA_Desmond	G	A	G	G	G	G	A
Y	7157286	2 to 3	C	T	C	C	T	T	C
Y	7157921	1 to PPA_Desmond	C	T	C	C	C	C	T
Y	7157991	1 to PPA_Desmond	G	A	G	G	G	G	A
Y	7159569	2 to PPA_Bono	C	T	T	T	C	C	C
Y	7165024	1 to PPA_Desmond	A	C	A	A	A	A	C
Y	7168543	1 to PPA_Desmond	T	C	T	T	T	T	C
Y	7168915	1 to PPA_Desmond	A	G	A	A	A	A	G
Y	7173152	1 to PPA_Desmond	C	A	A	A	A	A	C
Y	7173196	1 to 2	A	C	C	A	A	A	C
Y	7173695	3 to PPA_Masikini	G	A	A	G	G	A	G
Y	7173711	1 to PPA_Desmond	G	A	A	A	A	A	G
Y	7178030	1 to 2	C	T	C	T	T	T	C
Y	7178153	1 to PPA_Desmond	C	T	C	C	C	C	T
Y	7178352	1 to 2	A	T	A	T	T	T	A
Y	7179216	1 to PPA_Desmond	G	T	G	G	G	G	T
Y	7179727	1 to PPA_Desmond	C	T	C	C	C	C	T
Y	7180442	1 to 2	C	T	C	T	T	T	C
Y	7180646	1 to PPA_Desmond	T	A	T	T	T	T	A
Y	7180837	1 to 2	T	C	T	C	C	C	T
Y	7186108	2 to 3	C	T	C	C	T	T	C
Y	7186361	1 to PPA_Desmond	C	G	C	C	C	C	G
Y	7188768	1 to 2	G	T	G	T	T	T	G
Y	7188769	1 to 2	T	A	T	A	A	A	T
Y	7190556	1 to 2	A	T	A	T	T	T	A
Y	7193332	1 to PPA_Desmond	T	C	T	T	T	T	C
Y	7193335	2 to 3	C	T	C	C	T	T	C
Y	7193397	1 to PPA_Desmond	T	C	T	T	T	T	C
Y	7194686	1 to 2	C	T	C	T	T	T	C
Y	7196647	1 to 2	C	T	T	C	C	C	T
Y	7200075	1 to PPA_Desmond	G	A	G	G	G	G	A
Y	7201937	1 to 2	A	C	A	C	C	C	A
Y	7203922	1 to PPA_Desmond	A	G	A	A	A	A	G
Y	7206299	1 to 2	G	C	G	C	C	C	G
Y	7214212	1 to PPA_Desmond	C	T	C	C	C	C	T
Y	7216740	1 to PPA_Desmond	A	G	A	A	A	A	G
Y	7221604	1 to 2	A	G	A	G	G	G	A
Y	7224401	1 to PPA_Desmond	A	G	A	A	A	A	G
Y	7227517	1 to PPA_Desmond	C	T	C	C	C	C	T
Y	7229714	1 to PPA_Desmond	C	T	C	C	C	C	T
Y	7235325	1 to PPA_Desmond	T	G	T	T	T	T	G
Y	7236101	1 to 2	C	T	C	T	T	T	C
Y	7236402	1 to 2	C	A	C	A	A	A	C
Y	7238374	1 to PPA_Desmond	C	G,A	G	G	G	G	A
Y	7243022	1 to 2	A	G	A	G	G	G	A
Y	7243080	1 to PPA_Desmond	G	C	G	G	G	G	C
Y	7243792	1 to 2	A	G	A	G	G	G	A
Y	7245776	1 to PPA_Desmond	C	T	C	C	C	C	T
Y	7245881	2 to 3	C	T	C	C	T	T	C
Y	7245953	1 to PPA_Desmond	G	A	G	G	G	G	A
Y	7248304	1 to PPA_Desmond	A	C	A	A	A	A	C
Y	7248981	1 to PPA_Desmond	G	A	G	G	G	G	A
Y	7250995	1 to 2	C	A	C	A	A	A	C
Y	7252591	1 to PPA_Desmond	T	C	C	C	C	C	T
Y	7252871	1 to 2	A	G	G	A	A	A	G
Y	7259944	1 to 2	A	C	A	C	C	C	A
Y	7260203	1 to PPA_Desmond	G	A	G	G	G	G	A
Y	7260789	1 to PPA_Desmond	T	C	T	T	T	T	C
Y	7270717	1 to PPA_Desmond	A	G	A	A	A	A	G
Y	7272593	1 to 2	C	G	C	G	G	G	C
Y	7274556	2 to PPA_Bono	T	G	T	G	T	T	T
Y	7274562	1 to PPA_Desmond	A	G	A	A	A	A	G
Y	7278322	1 to PPA_Desmond	G	C	G	G	G	G	C
Y	7281199	1 to PPA_Desmond	C	A	C	C	C	C	A
Y	7281531	1 to PPA_Desmond	G	A	G	G	G	G	A
Y	7281748	1 to 2	T	C	T	C	C	C	T
Y	7284074	1 to 2	G	A	G	A	A	A	G
Y	7285256	1 to 2	C	T	C	T	T	T	C
Y	7285671	1 to PPA_Desmond	A	T	A	A	A	A	T
Y	7286127	1 to 2	G	A	G	A	A	A	G
Y	7290432	1 to PPA_Desmond	G	A	G	G	G	G	A
Y	7290644	1 to PPA_Desmond	T	G	T	T	T	T	G
Y	7290662	1 to 2	A	C	A	C	C	C	A
Y	7292703	1 to PPA_Desmond	A	C	A	A	A	A	C
Y	7301783	1 to PPA_Desmond	A	G	A	A	A	A	G
Y	7302971	3 to PPA_Masikini	G	A	G	G	G	A	G
Y	7305249	1 to PPA_Desmond	A	C	A	A	A	A	C
Y	7309155	1 to 2	A	G	A	G	G	G	A
Y	7309319	1 to PPA_Desmond	G	A	G	G	G	G	A
Y	7309386	1 to PPA_Desmond	G	A	G	G	G	G	A
Y	7309951	1 to PPA_Desmond	G	A	G	G	G	G	A
Y	7310360	1 to PPA_Desmond	T	C	T	T	T	T	C
Y	7310390	1 to 2	C	G	C	G	G	G	C
Y	7312796	2 to 3	G	T	G	G	T	T	G
Y	7314047	1 to 2	C	T	C	T	T	T	C
Y	7326154	2 to 3	A	G	A	A	G	G	A
Y	7327046	2 to PPA_Bono	G	A	G	A	G	G	G
Y	7328588	2 to PPA_Bono	G	T	G	T	G	G	G
Y	7328864	1 to 2	A	G	A	G	G	G	A
Y	7332328	1 to PPA_Desmond	G	T	G	G	G	G	T
Y	7332618	1 to 2	C	T	C	T	T	T	C
Y	7333543	1 to PPA_Desmond	C	T	C	C	C	C	T
Y	7337067	1 to PPA_Desmond	G	A	G	G	G	G	A
Y	7337121	1 to 2	G	A	G	A	A	A	G
Y	7350282	1 to PPA_Desmond	G	A	A	A	A	A	G
Y	7352202	1 to 2	A	G	A	G	G	G	A
Y	7352542	1 to PPA_Desmond	T	A	T	T	T	T	A
Y	7354201	1 to 2	C	T	T	C	C	C	T
Y	7357773	1 to PPA_Desmond	A	C	A	A	A	A	C
Y	7361436	1 to 2	C	A	C	A	A	A	C
Y	7361817	1 to PPA_Desmond	C	T	T	T	T	T	C
Y	7363388	1 to PPA_Desmond	T	C	T	T	T	T	C
Y	7364137	1 to PPA_Desmond	G	T	G	G	G	G	T
Y	7364352	1 to 2	G	T	G	T	T	T	G
Y	7365557	1 to PPA_Desmond	C	T	C	C	C	C	T
Y	7366082	1 to PPA_Desmond	A	G	A	A	A	A	G
Y	7376158	1 to 2	A	T	A	T	T	T	A
Y	7376254	1 to 2	A	C	A	C	C	C	A
Y	7382397	1 to PPA_Desmond	T	A	T	T	T	T	A
Y	7383298	2 to PPA_Bono	C	A	C	A	C	C	C
Y	7383595	1 to 2	T	C	T	C	C	C	T
Y	7385025	1 to PPA_Desmond	G	T	G	G	G	G	T
Y	7388026	1 to 2	A	T	A	T	T	T	A
Y	7389723	1 to PPA_Desmond	C	T	C	C	C	C	T
Y	7389903	1 to PPA_Desmond	C	T	C	C	C	C	T
Y	7389911	1 to 2	C	T	C	T	T	T	C
Y	7389981	1 to PPA_Desmond	T	C	T	T	T	T	C
Y	7389993	1 to PPA_Desmond	A	G	A	A	A	A	G
Y	7389997	1 to PPA_Desmond	G	A	G	G	G	G	A
Y	7390005	1 to 2	A	C	C	A	A	A	C
Y	7390013	1 to PPA_Desmond	C	T	C	C	C	C	T
Y	7390019	1 to PPA_Desmond	A	G	A	A	A	A	G
Y	7396278	1 to PPA_Desmond	A	G	A	A	A	A	G
Y	7398532	2 to 3	A	G	A	A	G	G	A
Y	7399327	1 to 2	C	T	C	T	T	T	C
Y	7406209	1 to 2	T	A	T	A	A	A	T
Y	7406267	2 to 3	C	T	C	C	T	T	C
Y	7406268	2 to 3	C	A	C	C	A	A	C
Y	7411184	2 to 3	G	A	G	G	A	A	G
Y	7411370	1 to 2	C	T	C	T	T	T	C
Y	7412648	1 to PPA_Desmond	A	G	A	A	A	A	G
Y	7413696	1 to 2	A	G	A	G	G	G	A
Y	7416002	1 to PPA_Desmond	C	A	C	C	C	C	A
Y	7417425	1 to 2	C	T	C	T	T	T	C
Y	7418260	1 to 2	G	A	G	A	A	A	G
Y	7418672	1 to 2	G	C	G	C	C	C	G
Y	7418922	1 to 2	C	T	C	T	T	T	C
Y	7419288	2 to 3	G	C	G	G	C	C	G
Y	7420754	1 to 2	T	C	T	C	C	C	T
Y	7426054	1 to PPA_Desmond	C	T	C	C	C	C	T
Y	7428586	2 to 3	A	G	A	A	G	G	A
Y	7430269	1 to 2	A	G	A	G	G	G	A
Y	7431240	1 to PPA_Desmond	G	T	G	G	G	G	T
Y	7434573	1 to PPA_Desmond	C	G	C	C	C	C	G
Y	7434675	1 to PPA_Desmond	A	T	A	A	A	A	T
Y	7437530	1 to 2	C	T	C	T	T	T	C
Y	7437549	1 to PPA_Desmond	G	T	G	G	G	G	T
Y	13895846	1 to 2	A	T	A	T	T	T	A
Y	13900559	1 to PPA_Desmond	G	A	G	G	G	G	A
Y	13935412	3 to PPA_PPA2	G	A	G	G	A	G	G
Y	13987969	1 to PPA_Desmond	A	C	A	A	A	A	C
Y	13991418	1 to PPA_Desmond	C	A	C	C	C	C	A
Y	13992055	1 to PPA_Desmond	G	C	G	G	G	G	C
Y	13992086	1 to PPA_Desmond	G	A	G	G	G	G	A
Y	13997924	1 to PPA_Desmond	C	G	C	C	C	C	G
Y	13998648	1 to PPA_Desmond	T	A	T	T	T	T	A
Y	14002004	2 to 3	C	T	C	C	T	T	C
Y	14007151	1 to 2	G	C	G	C	C	C	G
Y	14007261	1 to PPA_Desmond	C	T	T	T	T	T	C
Y	14017849	2 to 3	G	C	G	G	C	C	G
Y	14017943	1 to 2	C	T	C	T	T	T	C
Y	14020832	1 to 2	G	T	G	T	T	T	G
Y	14022585	1 to 2	C	T	C	T	T	T	C
Y	14022714	1 to PPA_Desmond	G	A	G	G	G	G	A
Y	14024216	1 to PPA_Desmond	A	G	A	A	A	A	G
Y	14026929	1 to 2	A	G	A	G	G	G	A
Y	14027606	1 to 2	A	G	A	G	G	G	A
Y	14028352	1 to 2	G	A	A	G	G	G	A
Y	14033273	1 to 2	A	G	A	G	G	G	A
Y	14033671	1 to PPA_Desmond	C	A	C	C	C	C	A
Y	14034158	1 to PPA_Desmond	A	G	A	A	A	A	G
Y	14036472	1 to PPA_Desmond	A	T	A	A	A	A	T
Y	14037747	1 to PPA_Desmond	T	C	T	T	T	T	C
Y	14037947	1 to PPA_Desmond	C	G	C	C	C	C	G
Y	14038801	1 to PPA_Desmond	C	G	C	C	C	C	G
Y	14040221	1 to 2	G	A	G	A	A	A	G
Y	14040635	1 to PPA_Desmond	T	C	T	T	T	T	C
Y	14044545	1 to 2	C	T	C	T	T	T	C
Y	14050549	1 to PPA_Desmond	T	G	T	T	T	T	G
Y	14050561	1 to PPA_Desmond	A	T	A	A	A	A	T
Y	14050791	1 to PPA_Desmond	T	C	T	T	T	T	C
Y	14051316	1 to PPA_Desmond	C	T	C	C	C	C	T
Y	14060247	1 to 2	G	A	G	A	A	A	G
Y	14061391	1 to 2	C	T	C	T	T	T	C
Y	14063440	1 to PPA_Desmond	C	G	C	C	C	C	G
Y	14065411	1 to PPA_Desmond	C	T	C	C	C	C	T
Y	14067572	1 to PPA_Desmond	G	C	G	G	G	G	C
Y	14076145	1 to 2	C	T	C	T	T	T	C
Y	14076264	1 to 2	G	A	G	A	A	A	G
Y	14077675	1 to PPA_Desmond	T	C	T	T	T	T	C
Y	14080506	1 to PPA_Desmond	A	G	A	A	A	A	G
Y	14080810	1 to 2	C	T	C	T	T	T	C
Y	14081392	1 to PPA_Desmond	C	T	C	C	C	C	T
Y	14082213	1 to PPA_Desmond	C	T	C	C	C	C	T
Y	14082268	1 to PPA_Desmond	G	C	G	G	G	G	C
Y	14083214	1 to PPA_Desmond	C	G	C	C	C	C	G
Y	14084492	1 to PPA_Desmond	G	C	G	G	G	G	C
Y	14084527	1 to 2	G	T	G	T	T	T	G
Y	14090016	1 to PPA_Desmond	T	C	C	C	C	C	T
Y	14090646	1 to PPA_Desmond	A	G	G	G	G	G	A
Y	14091664	1 to 2	G	A	G	A	A	A	G
Y	14092983	1 to 2	C	T	C	T	T	T	C
Y	14097691	1 to PPA_Desmond	G	C	G	G	G	G	C
Y	14104176	2 to PPA_Bono	G	A	G	A	G	G	G
Y	14105699	1 to 2	A	G	A	G	G	G	A
Y	14136609	1 to 2	G	A	G	A	A	A	G
Y	14137712	1 to PPA_Desmond	T	G	T	T	T	T	G
Y	14138551	1 to 2	T	A	T	A	A	A	T
Y	14139034	2 to PPA_Bono	A	G	G	A	G	G	G
Y	14139513	1 to 2	C	T	C	T	T	T	C
Y	14141986	1 to PPA_Desmond	T	C	T	T	T	T	C
Y	14142466	1 to PPA_Desmond	C	G	C	C	C	C	G
Y	14143030	1 to 2	A	G	A	G	G	G	A
Y	14144510	1 to PPA_Desmond	G	T	G	G	G	G	T
Y	14145147	1 to PPA_Desmond	A	G	A	A	A	A	G
Y	14147610	1 to 2	C	T	C	T	T	T	C
Y	14149905	1 to PPA_Desmond	T	C	T	T	T	T	C
Y	14150984	1 to PPA_Desmond	A	C	A	A	A	A	C
Y	14158513	1 to PPA_Desmond	A	G	A	A	A	A	G
Y	14160067	1 to 2	C	T	T	C	C	C	T
Y	14160085	1 to 2	A	G	A	G	G	G	A
Y	14160225	1 to PPA_Desmond	G	C	G	G	G	G	C
Y	14168599	1 to 2	C	T	C	T	T	T	C
Y	14172805	1 to 2	T	C	T	C	C	C	T
Y	14172861	1 to PPA_Desmond	C	T	C	C	C	C	T
Y	14172900	1 to PPA_Desmond	T	C	T	T	T	T	C
Y	14173714	1 to 2	C	A	A	C	C	C	A
Y	14173976	2 to 3	C	T	C	C	T	T	C
Y	14183370	1 to 2	A	G	A	G	G	G	A
Y	14188095	1 to PPA_Desmond	C	T	C	C	C	C	T
Y	14188191	1 to 2	C	A	C	A	A	A	C
Y	14188708	1 to 2	C	T	C	T	T	T	C
Y	14188931	1 to PPA_Desmond	A	G	A	A	A	A	G
Y	14192161	2 to 3	T	C	T	T	C	C	T
Y	14193745	1 to PPA_Desmond	G	A	G	G	G	G	A
Y	14194138	1 to PPA_Desmond	G	A	G	G	G	G	A
Y	14197285	1 to 2	T	G	T	G	G	G	T
Y	14197951	2 to 3	C	T	C	C	T	T	C
Y	14198958	2 to PPA_Bono	C	A	C	A	C	C	C
Y	14209439	1 to PPA_Desmond	C	T	C	C	C	C	T
Y	14209844	1 to 2	C	T	C	T	T	T	C
Y	14211321	1 to PPA_Desmond	T	C	T	T	T	T	C
Y	14212668	1 to PPA_Desmond	G	A	G	G	G	G	A
Y	14213086	1 to 2	G	A	G	A	A	A	G
Y	14216527	1 to PPA_Desmond	T	C	T	T	T	T	C
Y	14218883	1 to 2	T	C	T	C	C	C	T
Y	14220190	1 to PPA_Desmond	C	G	C	C	C	C	G
Y	14223922	1 to 2	C	T	C	T	T	T	C
Y	14231037	1 to PPA_Desmond	G	A	G	G	G	G	A
Y	14231277	2 to 3	T	A	T	T	A	A	T
Y	14231439	1 to 2	C	G	C	G	G	G	C
Y	14231573	1 to 2	T	C	T	C	C	C	T
Y	14232563	1 to PPA_Desmond	T	A	T	T	T	T	A
Y	14234469	1 to PPA_Desmond	C	T	C	C	C	C	T
Y	14235966	1 to PPA_Desmond	G	T	G	G	G	G	T
Y	14236455	1 to PPA_Desmond	T	G	T	T	T	T	G
Y	14236659	1 to 2	A	G	A	G	G	G	A
Y	14242904	1 to PPA_Desmond	A	T	A	A	A	A	T
Y	14250033	1 to 2	C	G	C	G	G	G	C
Y	14253442	1 to 2	T	C	T	C	C	C	T
Y	14262871	1 to PPA_Desmond	G	A	G	G	G	G	A
Y	14263921	2 to PPA_Bono	G	T	G	T	G	G	G
Y	14264136	2 to 3	A	G	A	A	G	G	A
Y	14264806	2 to PPA_Bono	A	C	A	C	A	A	A
Y	14264992	1 to PPA_Desmond	A	C	A	A	A	A	C
Y	14274852	2 to 3	G	A	A	G	A	A	G
Y	14275039	1 to PPA_Desmond	T	C	T	T	T	T	C
Y	14275518	1 to PPA_Desmond	T	A	T	T	T	T	A
Y	14275585	1 to 2	G	A	G	A	A	A	G
Y	14276363	1 to PPA_Desmond	C	T	C	C	C	C	T
Y	14281936	1 to 2	G	C	G	C	C	C	G
Y	14282045	2 to PPA_Bono	G	T	G	T	G	G	G
Y	14282368	1 to PPA_Desmond	C	T	C	C	C	C	T
Y	14285321	1 to PPA_Desmond	A	G	A	A	A	A	G
Y	14285370	1 to PPA_Desmond	G	A	G	G	G	G	A
Y	14288553	1 to 2	C	G	C	G	G	G	C
Y	14288983	2 to 3	G	A	A	G	A	A	G
Y	14297625	1 to 2	G	T	G	T	T	T	G
Y	14298545	1 to PPA_Desmond	T	A,C	A	A	A	A	C
Y	14298666	1 to PPA_Desmond	C	T	C	C	C	C	T
Y	14314289	1 to PPA_Desmond	C	G	C	C	C	C	G
Y	14321616	1 to 2	T	C	T	C	C	C	T
Y	14342991	1 to PPA_Desmond	A	G	A	A	A	A	G
Y	14362305	1 to PPA_Desmond	T	C	T	T	T	T	C
Y	14373037	1 to PPA_Desmond	G	A	G	G	G	G	A
Y	14374855	1 to 2	G	A	G	A	A	A	G
Y	14375975	1 to PPA_Desmond	T	C	T	T	T	T	C
Y	14378291	2 to 3	A	G	A	A	G	G	A
Y	14388124	1 to 2	G	T	T	G	G	G	T
Y	14388321	1 to 2	T	G	T	G	G	G	T
Y	14389187	1 to 2	C	A	C	A	A	A	C
Y	14389866	1 to 2	A	G	A	G	G	G	A
Y	14391641	2 to PPA_Bono	A	G	A	G	A	A	A
Y	14392521	1 to 2	A	G	A	G	G	G	A
Y	14393249	1 to 2	A	C	A	C	C	C	A
Y	14393250	1 to 2	G	A	G	A	A	A	G
Y	14394568	1 to PPA_Desmond	C	T	C	C	C	C	T
Y	14395428	1 to PPA_Desmond	T	A	T	T	T	T	A
Y	14396248	1 to PPA_Desmond	C	T	C	C	C	C	T
Y	14396365	1 to PPA_Desmond	T	A	T	T	T	T	A
Y	14396852	1 to 2	G	A	G	A	A	A	G
Y	14401676	1 to PPA_Desmond	G	C	G	G	G	G	C
Y	14410543	1 to 2	T	C	T	C	C	C	T
Y	14411632	1 to 2	G	A	A	G	G	G	A
Y	14414423	1 to PPA_Desmond	T	C	T	T	T	T	C
Y	14415315	1 to 2	G	T	G	T	T	T	G
Y	14416289	1 to PPA_Desmond	C	T	C	C	C	C	T
Y	14417159	1 to 2	C	A	C	A	A	A	C
Y	14427752	1 to PPA_Desmond	C	A	C	C	C	C	A
Y	14429599	1 to 2	C	T	C	T	T	T	C
Y	14430015	1 to PPA_Desmond	C	A	C	C	C	C	A
Y	14430311	1 to 2	G	T	G	T	T	T	G
Y	14430781	1 to 2	C	T	C	T	T	T	C
Y	14442803	1 to PPA_Desmond	C	T	C	C	C	C	T
Y	14448376	1 to PPA_Desmond	G	A	G	G	G	G	A
Y	14448830	1 to PPA_Desmond	C	T	C	C	C	C	T
Y	14450765	1 to PPA_Desmond	A	G	A	A	A	A	G
Y	14452782	1 to PPA_Desmond	G	A	G	G	G	G	A
Y	14453043	1 to PPA_Desmond	G	C	G	G	G	G	C
Y	14453446	1 to PPA_Desmond	G	T	G	G	G	G	T
Y	14455204	1 to PPA_Desmond	C	T	C	C	C	C	T
Y	14455858	1 to PPA_Desmond	G	T	G	G	G	G	T
Y	14456129	1 to PPA_Desmond	T	C	T	T	T	T	C
Y	14462961	1 to 2	A	T	A	T	T	T	A
Y	14467921	1 to 2	C	T	C	T	T	T	C
Y	14468258	2 to 3	T	C	T	T	C	C	T
Y	14470163	1 to 2	C	A	C	A	A	A	C
Y	14470422	1 to 2	G	C	G	C	C	C	G
Y	14470500	1 to PPA_Desmond	G	T	G	G	G	G	T
Y	14472366	2 to 3	A	G	A	A	G	G	A
Y	14473762	1 to 2	A	G	A	G	G	G	A
Y	14475161	1 to PPA_Desmond	C	T	C	C	C	C	T
Y	14482809	1 to PPA_Desmond	C	T	C	C	C	C	T
Y	14482888	2 to 3	G	A	G	G	A	A	G
Y	14486625	1 to 2	A	C	A	C	C	C	A
Y	14488916	1 to 2	T	G,A	A	G	G	G	A
Y	14489323	2 to 3	C	G	C	C	G	G	C
Y	14490049	1 to PPA_Desmond	A	G	A	A	A	A	G
Y	14491424	1 to PPA_Desmond	T	G	T	T	T	T	G
Y	14491809	1 to PPA_Desmond	G	A	G	G	G	G	A
Y	14492321	1 to PPA_Desmond	C	A	C	C	C	C	A
Y	14496118	1 to 2	C	T	C	T	T	T	C
Y	14496181	1 to 2	G	A	G	A	A	A	G
Y	14499410	1 to PPA_Desmond	T	C	T	T	T	T	C
Y	14499814	1 to PPA_Desmond	G	A	G	G	G	G	A
Y	14499875	1 to PPA_Desmond	A	G	G	G	G	G	A
Y	14501176	2 to PPA_Bono	T	C	T	C	T	T	T
Y	14508970	1 to PPA_Desmond	C	T	C	C	C	C	T
Y	14512996	1 to PPA_Desmond	A	T	A	A	A	A	T
Y	14515886	1 to 2	G	A	G	A	A	A	G
Y	14516593	1 to PPA_Desmond	G	A	G	G	G	G	A
Y	14518399	1 to 2	A	G	A	G	G	G	A
Y	14518408	1 to PPA_Desmond	C	G	C	C	C	C	G
Y	14520317	1 to PPA_Desmond	C	T	C	C	C	C	T
Y	14520540	1 to PPA_Desmond	G	C	G	G	G	G	C
Y	14522514	1 to 2	T	G	T	G	G	G	T
Y	14522578	1 to PPA_Desmond	G	A	G	G	G	G	A
Y	14524568	1 to PPA_Desmond	G	T	G	G	G	G	T
Y	14527152	1 to PPA_Desmond	G	A	A	A	A	A	G
Y	14527203	1 to 2	C	T	C	T	T	T	C
Y	14527813	1 to PPA_Desmond	A	C	A	A	A	A	C
Y	14529523	1 to PPA_Desmond	C	A	C	C	C	C	A
Y	14531049	1 to PPA_Desmond	A	G	A	A	A	A	G
Y	14539213	1 to PPA_Desmond	G	C	G	G	G	G	C
Y	14547475	1 to 2	A	C	A	C	C	C	A
Y	14548692	1 to 2	C	T	C	T	T	T	C
Y	14550991	1 to PPA_Desmond	G	A	G	G	G	G	A
Y	14551816	2 to 3	G	C	G	G	C	C	G
Y	14552127	1 to 2	C	T	C	T	T	T	C
Y	14554673	1 to 2	G	A	G	A	A	A	G
Y	14555708	1 to 2	A	C	A	C	C	C	A
Y	14558156	1 to PPA_Desmond	T	C	T	T	T	T	C
Y	14562796	1 to PPA_Desmond	G	A	G	G	G	G	A
Y	14566740	1 to PPA_Desmond	C	G	C	C	C	C	G
Y	14566908	1 to 2	G	A	G	A	A	A	G
Y	14567607	1 to PPA_Desmond	G	A	G	G	G	G	A
Y	14568042	1 to 2	C	A	C	A	A	A	C
Y	14568489	1 to 2	G	C	G	C	C	C	G
Y	14573633	1 to 2	T	C,G	G	C	C	C	G
Y	14573731	1 to 2	G	C,T	T	C	C	C	T
Y	14579131	1 to PPA_Desmond	T	C	T	T	T	T	C
Y	14579897	1 to PPA_Desmond	A	G	A	A	A	A	G
Y	14580318	1 to PPA_Desmond	C	T	C	C	C	C	T
Y	14580681	1 to PPA_Desmond	C	T	C	C	C	C	T
Y	14591494	1 to 2	C	T	C	T	T	T	C
Y	14591952	1 to PPA_Desmond	T	C	T	T	T	T	C
Y	14596790	1 to 2	T	C	C	T	T	T	C
Y	14597302	1 to 2	A	G	A	G	G	G	A
Y	14597767	2 to 3	T	C	T	T	C	C	T
Y	14599542	1 to 2	C	A	C	A	A	A	C
Y	14601996	1 to 2	A	C	A	C	C	C	A
Y	14604075	2 to 3	T	C	T	T	C	C	T
Y	14605296	1 to PPA_Desmond	T	C,G	C	C	C	C	G
Y	14607452	1 to PPA_Desmond	C	A	C	C	C	C	A
Y	14608904	1 to 2	G	A	A	G	G	G	A
Y	14610088	1 to PPA_Desmond	T	C	T	T	T	T	C
Y	14610896	1 to PPA_Desmond	C	G	G	G	G	G	C
Y	14622370	1 to PPA_Desmond	A	G	A	A	A	A	G
Y	14637371	1 to PPA_Desmond	T	C	T	T	T	T	C
Y	14639749	2 to 3	C	A	C	C	A	A	C
Y	14645351	1 to 2	A	C	A	C	C	C	A
Y	14646175	1 to PPA_Desmond	G	A	G	G	G	G	A
Y	14647906	1 to PPA_Desmond	G	T	G	G	G	G	T
Y	14651732	1 to 2	T	C	T	C	C	C	T
Y	14651943	1 to 2	T	C	T	C	C	C	T
Y	14652226	1 to 2	C	G	C	G	G	G	C
Y	14652732	1 to 2	C	A,G	G	A	A	A	G
Y	14652773	1 to PPA_Desmond	C	T	C	C	C	C	T
Y	14652783	1 to PPA_Desmond	C	T	C	C	C	C	T
Y	14653443	2 to 3	A	G	A	A	G	G	A
Y	14654822	1 to 2	C	G	C	G	G	G	C
Y	14655628	1 to PPA_Desmond	T	C	T	T	T	T	C
Y	14656728	1 to 2	G	A	G	A	A	A	G
Y	14657057	1 to PPA_Desmond	A	C	A	A	A	A	C
Y	14657848	1 to PPA_Desmond	C	T	C	C	C	C	T
Y	14657986	1 to 2	A	G	A	G	G	G	A
Y	14658150	1 to PPA_Desmond	G	A	G	G	G	G	A
Y	14662790	1 to PPA_Desmond	C	G	C	C	C	C	G
Y	14663595	1 to PPA_Desmond	C	A	C	C	C	C	A
Y	14663614	1 to 2	C	T	C	T	T	T	C
Y	14664940	2 to PPA_Bono	G	A	G	A	G	G	G
Y	14666738	1 to 2	C	G	C	G	G	G	C
Y	14697290	1 to PPA_Desmond	T	G	T	T	T	T	G
Y	14702987	1 to PPA_Desmond	G	A	G	G	G	G	A
Y	14706114	1 to PPA_Desmond	C	A	C	C	C	C	A
Y	14706684	1 to 2	T	G	T	G	G	G	T
Y	14721071	1 to 2	G	A	G	A	A	A	G
Y	14721307	2 to PPA_Bono	C	G	C	G	C	C	C
Y	14723333	1 to PPA_Desmond	T	A	A	A	A	A	T
Y	14723475	1 to PPA_Desmond	G	A	G	G	G	G	A
Y	14727425	1 to 2	G	T	G	T	T	T	G
Y	14729176	1 to PPA_Desmond	G	A	G	G	G	G	A
Y	14729762	1 to PPA_Desmond	C	A	C	C	C	C	A
Y	14730149	2 to PPA_Bono	G	A	G	A	G	G	G
Y	14730313	1 to PPA_Desmond	C	T	C	C	C	C	T
Y	14731253	1 to 2	G	C	G	C	C	C	G
Y	14744801	1 to PPA_Desmond	T	C	T	T	T	T	C
Y	14745373	1 to 2	T	G	T	G	G	G	T
Y	14750791	1 to PPA_Desmond	C	G	C	C	C	C	G
Y	14771379	1 to PPA_Desmond	C	G	C	C	C	C	G
Y	14772586	1 to PPA_Desmond	C	T	C	C	C	C	T
Y	14774485	1 to 2	G	C	G	C	C	C	G
Y	14774549	1 to 2	T	G	G	T	T	T	G
Y	14774671	1 to PPA_Desmond	G	A	G	G	G	G	A
Y	14774922	1 to PPA_Desmond	C	G	C	C	C	C	G
Y	14774999	1 to 2	C	T	C	T	T	T	C
Y	14775197	2 to 3	C	T	C	C	T	T	C
Y	14777196	1 to 2	A	G	A	G	G	G	A
Y	14801158	1 to 2	C	T	C	T	T	T	C
Y	14801812	1 to PPA_Desmond	T	A	T	T	T	T	A
Y	14804076	1 to 2	C	T	T	C	C	C	T
Y	14814759	1 to PPA_Desmond	T	G	T	T	T	T	G
Y	14819693	1 to 2	G	T,A	A	T	T	T	A
Y	14820300	1 to PPA_Desmond	C	T	C	C	C	C	T
Y	14830150	1 to 2	A	T	A	T	T	T	A
Y	14830970	1 to 2	G	A	G	A	A	A	G
Y	14832307	1 to 2	G	A	G	A	A	A	G
Y	14835447	1 to PPA_Desmond	C	T	C	C	C	C	T
Y	14839376	1 to PPA_Desmond	C	T	T	T	T	T	C
Y	14839448	1 to PPA_Desmond	C	T	C	C	C	C	T
Y	14845905	1 to 2	G	A	G	A	A	A	G
Y	14846746	1 to PPA_Desmond	A	G	A	A	A	A	G
Y	14848846	2 to PPA_Bono	G	C	G	C	G	G	G
Y	14851098	1 to 2	T	A	T	A	A	A	T
Y	14852365	1 to PPA_Desmond	C	T	C	C	C	C	T
Y	14853154	1 to 2	C	A	C	A	A	A	C
Y	14854244	1 to PPA_Desmond	C	T	C	C	C	C	T
Y	14854307	1 to PPA_Desmond	A	C	A	A	A	A	C
Y	14855738	2 to 3	T	A	T	T	A	A	T
Y	14855854	2 to 3	T	A	T	T	A	A	T
Y	14856077	1 to PPA_Desmond	G	A	G	G	G	G	A
Y	14856112	1 to 2	A	T	A	T	T	T	A
Y	14868626	1 to PPA_Desmond	G	A	G	G	G	G	A
Y	14870785	1 to 2	G	A	G	A	A	A	G
Y	14870909	1 to PPA_Desmond	A	G	A	A	A	A	G
Y	14871733	2 to 3	A	C	A	A	C	C	A
Y	14872914	1 to 2	C	T	C	T	T	T	C
Y	14872950	1 to 2	G	C	G	C	C	C	G
Y	14881110	1 to 2	T	C	T	C	C	C	T
Y	14882566	1 to 2	T	C	T	C	C	C	T
Y	14883560	1 to 2	A	T	A	T	T	T	A
Y	14884986	2 to 3	A	C	A	A	C	C	A
Y	14886046	1 to 2	G	T	G	T	T	T	G
Y	14889666	1 to PPA_Desmond	G	A	G	G	G	G	A
Y	14896332	1 to 2	C	T	C	T	T	T	C
Y	14896741	1 to 2	A	G	A	G	G	G	A
Y	14897701	1 to PPA_Desmond	A	G	G	G	G	G	A
Y	14897724	1 to 2	A	G	A	G	G	G	A
Y	14899076	1 to 2	A	C	A	C	C	C	A
Y	14902519	1 to PPA_Desmond	G	A	G	G	G	G	A
Y	14903546	1 to PPA_Desmond	A	G	A	A	A	A	G
Y	14912735	1 to 2	T	C	T	C	C	C	T
Y	14915289	1 to PPA_Desmond	T	G	T	T	T	T	G
Y	14915574	1 to PPA_Desmond	A	G	A	A	A	A	G
Y	14915653	1 to 2	G	A	G	A	A	A	G
Y	14921855	1 to 2	T	C	T	C	C	C	T
Y	14922059	1 to PPA_Desmond	C	G	C	C	C	C	G
Y	14922566	1 to PPA_Desmond	G	A	G	G	G	G	A
Y	14923120	1 to PPA_Desmond	G	A	G	G	G	G	A
Y	14924296	1 to PPA_Desmond	A	G	A	A	A	A	G
Y	14925379	1 to PPA_Desmond	G	T	G	G	G	G	T
Y	14925541	1 to PPA_Desmond	T	C	T	T	T	T	C
Y	14925563	1 to 2	G	A	G	A	A	A	G
Y	14927196	1 to 2	C	T	C	T	T	T	C
Y	14928390	1 to 2	G	C	G	C	C	C	G
Y	14929193	1 to 2	G	A	G	A	A	A	G
Y	14929254	1 to PPA_Desmond	A	G	A	A	A	A	G
Y	14929875	1 to 2	G	A	G	A	A	A	G
Y	14930501	1 to PPA_Desmond	C	T	C	C	C	C	T
Y	14930637	1 to PPA_Desmond	T	C	T	T	T	T	C
Y	14932473	2 to 3	C	T	C	C	T	T	C
Y	14938280	1 to 2	C	T	C	T	T	T	C
Y	14944348	1 to PPA_Desmond	G	A	G	G	G	G	A
Y	14945719	1 to PPA_Desmond	G	A	G	G	G	G	A
Y	14950890	1 to 2	G	T	G	T	T	T	G
Y	14951303	1 to PPA_Desmond	T	C	T	T	T	T	C
Y	14951666	1 to PPA_Desmond	T	G	T	T	T	T	G
Y	14953394	1 to 2	G	A	G	A	A	A	G
Y	14954113	1 to PPA_Desmond	A	T	A	A	A	A	T
Y	14954401	1 to 2	T	C	C	T	T	T	C
Y	14955970	1 to 2	G	T	G	T	T	T	G
Y	14955991	1 to PPA_Desmond	C	A	C	C	C	C	A
Y	14956822	1 to 2	G	A	G	A	A	A	G
Y	14958326	1 to 2	G	A	G	A	A	A	G
Y	14958876	1 to PPA_Desmond	A	G	A	A	A	A	G
Y	14959217	1 to PPA_Desmond	A	G	A	A	A	A	G
Y	14965821	1 to 2	A	G	G	A	A	A	G
Y	14967875	1 to PPA_Desmond	A	C	A	A	A	A	C
Y	14969559	2 to 3	T	C	T	T	C	C	T
Y	14971284	1 to 2	A	C	A	C	C	C	A
Y	14972301	1 to PPA_Desmond	A	G	A	A	A	A	G
Y	14975448	1 to PPA_Desmond	C	T	C	C	C	C	T
Y	14978256	1 to PPA_Desmond	G	T	G	G	G	G	T
Y	14978702	1 to 2	C	G	C	G	G	G	C
Y	14983134	1 to 2	A	G	G	A	A	A	G
Y	14984102	1 to 2	T	C	T	C	C	C	T
Y	14985636	1 to 2	A	C	A	C	C	C	A
Y	14987703	1 to PPA_Desmond	C	T	T	T	T	T	C
Y	14988341	1 to 2	C	G	C	G	G	G	C
Y	14999387	1 to 2	A	G	G	A	A	A	G
Y	14999551	1 to 2	C	A	C	A	A	A	C
Y	15001119	1 to PPA_Desmond	C	T	C	C	C	C	T
Y	15014099	1 to PPA_Desmond	T	C	T	T	T	T	C
Y	15015491	1 to PPA_Desmond	C	G	C	C	C	C	G
Y	15015524	1 to PPA_Desmond	C	T	C	C	C	C	T
Y	15016431	1 to 2	A	G	A	G	G	G	A
Y	15016496	1 to 2	C	T	C	T	T	T	C
Y	15016757	1 to 2	T	C	T	C	C	C	T
Y	15016762	1 to 2	T	A	T	A	A	A	T
Y	15017226	1 to 2	G	C	G	C	C	C	G
Y	15017909	1 to PPA_Desmond	T	C	T	T	T	T	C
Y	15018514	1 to 2	A	G	A	G	G	G	A
Y	15019049	1 to 2	T	G	T	G	G	G	T
Y	15019452	1 to 2	C	T	C	T	T	T	C
Y	15023316	1 to PPA_Desmond	T	G	T	T	T	T	G
Y	15023417	1 to PPA_Desmond	T	C	T	T	T	T	C
Y	15024959	1 to 2	T	A	T	A	A	A	T
Y	15025381	1 to 2	A	G	A	G	G	G	A
Y	15025984	1 to 2	T	A	T	A	A	A	T
Y	15026581	1 to 2	A	G	A	G	G	G	A
Y	15028545	1 to PPA_Desmond	G	A	G	G	G	G	A
Y	15030360	1 to PPA_Desmond	A	G	A	A	A	A	G
Y	15039474	1 to PPA_Desmond	C	T	C	C	C	C	T
Y	15039699	1 to 2	G	A	G	A	A	A	G
Y	15039873	1 to 2	A	G	A	G	G	G	A
Y	15042816	1 to PPA_Desmond	A	G	A	A	A	A	G
Y	15043562	1 to 2	C	T	C	T	T	T	C
Y	15045733	1 to PPA_Desmond	A	G	A	A	A	A	G
Y	15057790	1 to 2	A	C	A	C	C	C	A
Y	15058503	1 to PPA_Desmond	C	T	C	C	C	C	T
Y	15059323	2 to PPA_Bono	C	T	C	T	C	C	C
Y	15059361	1 to PPA_Desmond	T	A	T	T	T	T	A
Y	15060183	1 to 2	G	C	G	C	C	C	G
Y	15060404	1 to 2	A	G	A	G	G	G	A
Y	15062551	1 to PPA_Desmond	C	G	C	C	C	C	G
Y	15062724	1 to 2	G	A	G	A	A	A	G
Y	15075690	1 to 2	G	T	G	T	T	T	G
Y	15077468	1 to 2	T	A	T	A	A	A	T
Y	15082600	1 to 2	A	G	A	G	G	G	A
Y	15082941	1 to 2	A	G	A	G	G	G	A
Y	15086926	1 to PPA_Desmond	G	A	G	G	G	G	A
Y	15088346	1 to PPA_Desmond	G	T	G	G	G	G	T
Y	15088756	1 to 2	T	C	T	C	C	C	T
Y	15139473	1 to 2	T	C	T	C	C	C	T
Y	15139999	1 to 2	C	T	C	T	T	T	C
Y	15161275	1 to PPA_Desmond	C	G	C	C	C	C	G
Y	15192988	1 to 2	C	T	C	T	T	T	C
Y	15208269	1 to 2	C	A	C	A	A	A	C
Y	15208780	1 to PPA_Desmond	G	A	G	G	G	G	A
Y	15219786	1 to 2	T	G	T	G	G	G	T
Y	15240375	1 to PPA_Desmond	A	G	A	A	A	A	G
Y	15240409	1 to PPA_Desmond	A	G	G	G	G	G	A
Y	15240711	1 to PPA_Desmond	G	A	G	G	G	G	A
Y	15250994	1 to PPA_Desmond	C	A	C	C	C	C	A
Y	15262908	1 to 2	A	G	A	G	G	G	A
Y	15263480	2 to 3	T	C	T	T	C	C	T
Y	15265650	1 to 2	A	G	A	G	G	G	A
Y	15266992	2 to PPA_Bono	A	G	A	G	A	A	A
Y	15273931	1 to 2	A	G	A	G	G	G	A
Y	15277888	2 to PPA_Bono	A	G	A	G	A	A	A
Y	15278046	1 to PPA_Desmond	T	C	T	T	T	T	C
Y	15278298	1 to PPA_Desmond	A	T	A	A	A	A	T
Y	15278596	1 to 2	T	C	T	C	C	C	T
Y	15314020	1 to 2	C	T	C	T	T	T	C
Y	15315249	1 to 2	A	C	A	C	C	C	A
Y	15316943	1 to PPA_Desmond	C	T	C	C	C	C	T
Y	15317049	2 to 3	T	C	C	C	T	T	C
Y	15318703	2 to PPA_Bono	A	G	A	G	A	A	A
Y	15343174	2 to PPA_Bono	A	C	A	C	A	A	A
Y	15345414	1 to 2	G	T	G	T	T	T	G
Y	15357336	1 to PPA_Desmond	C	T	C	C	C	C	T
Y	15358634	1 to PPA_Desmond	T	C	T	T	T	T	C
Y	15358650	1 to 2	C	T	C	T	T	T	C
Y	15359378	1 to 2	G	A	G	A	A	A	G
Y	15359733	1 to 2	C	A	C	A	A	A	C
Y	15360460	1 to 2	T	C	T	C	C	C	T
Y	15360630	1 to PPA_Desmond	T	C	T	T	T	T	C
Y	15372764	1 to 2	T	C	T	C	C	C	T
Y	15375730	1 to PPA_Desmond	C	T	C	C	C	C	T
Y	15382270	1 to PPA_Desmond	C	A	C	C	C	C	A
Y	15388828	1 to PPA_Desmond	G	A	G	G	G	G	A
Y	15389263	2 to 3	C	T	C	C	T	T	C
Y	15398957	1 to PPA_Desmond	A	C	A	A	A	A	C
Y	15409445	1 to PPA_Desmond	G	A	G	G	G	G	A
Y	15410186	1 to PPA_Desmond	C	T	C	C	C	C	T
Y	15411265	1 to PPA_Desmond	G	A	G	G	G	G	A
Y	15414178	1 to 2	C	T	C	T	T	T	C
Y	15436771	1 to PPA_Desmond	G	A	G	G	G	G	A
Y	15438048	1 to 2	A	C	A	C	C	C	A
Y	15441367	1 to PPA_Desmond	C	A	C	C	C	C	A
Y	15441602	1 to 2	A	G	A	G	G	G	A
Y	15441881	1 to PPA_Desmond	G	A	G	G	G	G	A
Y	15447181	1 to 2	C	T	C	T	T	T	C
Y	15459655	1 to 2	A	G	A	G	G	G	A
Y	15463007	2 to PPA_Bono	A	G	A	G	A	A	A
Y	15468059	1 to PPA_Desmond	A	G	G	G	G	G	A
Y	15469505	1 to PPA_Desmond	A	G	A	A	A	A	G
Y	15469784	1 to PPA_Desmond	C	T	C	C	C	C	T
Y	15471333	2 to PPA_Bono	G	C	G	C	G	G	G
Y	15471740	1 to 2	T	C	T	C	C	C	T
Y	15472071	1 to 2	T	G	T	G	G	G	T
Y	15473101	1 to 2	T	C	T	C	C	C	T
Y	15473579	1 to PPA_Desmond	T	C	T	T	T	T	C
Y	15473791	2 to PPA_Bono	G	A	G	A	G	G	G
Y	15475985	1 to 2	G	A	G	A	A	A	G
Y	15476749	1 to PPA_Desmond	T	A	T	T	T	T	A
Y	15479288	1 to 2	T	C	T	C	C	C	T
Y	15479664	1 to PPA_Desmond	T	C	T	T	T	T	C
Y	15485440	1 to 2	G	A	G	A	A	A	G
Y	15485514	1 to 2	A	C	A	C	C	C	A
Y	15490105	1 to PPA_Desmond	T	C	T	T	T	T	C
Y	15500441	1 to 2	T	A	T	A	A	A	T
Y	15508923	1 to 2	C	T	C	T	T	T	C
Y	15513771	1 to PPA_Desmond	A	G	A	A	A	A	G
Y	15519898	1 to PPA_Desmond	T	C	T	T	T	T	C
Y	15522600	1 to PPA_Desmond	C	G	C	C	C	C	G
Y	15522812	2 to 3	C	T	C	C	T	T	C
Y	15522836	1 to 2	T	A	A	T	T	T	A
Y	15523498	1 to PPA_Desmond	T	C	T	T	T	T	C
Y	15524973	2 to PPA_Bono	C	T	C	T	C	C	C
Y	15526387	1 to PPA_Desmond	C	T	C	C	C	C	T
Y	15526842	1 to PPA_Desmond	G	C	G	G	G	G	C
Y	15526895	1 to PPA_Desmond	A	C	A	A	A	A	C
Y	15526941	1 to PPA_Desmond	C	A,G	A	A	A	A	G
Y	15535532	1 to 2	T	C	T	C	C	C	T
Y	15536102	1 to PPA_Desmond	G	A	G	G	G	G	A
Y	15537447	1 to PPA_Desmond	T	C	T	T	T	T	C
Y	15546963	2 to PPA_Bono	A	G	A	G	A	A	A
Y	15547208	1 to 2	A	T	A	T	T	T	A
Y	15547298	1 to PPA_Desmond	C	G	C	C	C	C	G
Y	15547653	2 to 3	G	A	G	G	A	A	G
Y	15554196	1 to PPA_Desmond	T	C	T	T	T	T	C
Y	15561611	1 to 2	A	G	A	G	G	G	A
Y	15568546	2 to PPA_Bono	A	T	A	T	A	A	A
Y	15571479	1 to 2	C	T	C	T	T	T	C
Y	15572824	1 to 2	G	A	G	A	A	A	G
Y	15572904	1 to 2	C	G	C	G	G	G	C
Y	15573569	1 to 2	C	T	C	T	T	T	C
Y	15577983	2 to PPA_Bono	T	C	T	C	T	T	T
Y	15579611	1 to 2	G	A	G	A	A	A	G
Y	15580278	1 to PPA_Desmond	G	A	G	G	G	G	A
Y	15580351	1 to PPA_Desmond	T	C,A	C	C	C	C	A
Y	15582843	1 to 2	A	G	A	G	G	G	A
Y	15587321	1 to PPA_Desmond	A	G	A	A	A	A	G
Y	15590739	1 to 2	A	T	A	T	T	T	A
Y	15591143	1 to PPA_Desmond	T	C	T	T	T	T	C
Y	15592198	1 to 2	T	G	T	G	G	G	T
Y	15592229	1 to PPA_Desmond	G	A	G	G	G	G	A
Y	15592910	1 to 2	T	C	T	C	C	C	T
Y	15594714	2 to 3	G	A	G	G	A	A	G
Y	15602726	1 to PPA_Desmond	T	C	T	T	T	T	C
Y	15602902	2 to PPA_Bono	G	T	G	T	G	G	G
Y	15603536	1 to PPA_Desmond	C	T	C	C	C	C	T
Y	15603736	1 to 2	G	T	G	T	T	T	G
Y	15604228	1 to 2	C	G	C	G	G	G	C
Y	15605104	1 to PPA_Desmond	T	G	T	T	T	T	G
Y	15608822	1 to PPA_Desmond	C	A	C	C	C	C	A
Y	15634942	1 to PPA_Desmond	C	G	C	C	C	C	G
Y	15659552	1 to 2	T	G	T	G	G	G	T
Y	15660856	1 to PPA_Desmond	A	T	A	A	A	A	T
Y	15695376	2 to PPA_Bono	G	A	G	A	G	G	G
Y	15696560	1 to PPA_Desmond	A	G	A	A	A	A	G
Y	15701730	1 to 2	G	T	G	T	T	T	G
Y	15702076	1 to PPA_Desmond	A	T	A	A	A	A	T
Y	15703776	1 to PPA_Desmond	T	C	T	T	T	T	C
Y	15704475	1 to PPA_Desmond	G	C	G	G	G	G	C
Y	15705183	1 to PPA_Desmond	A	G	A	A	A	A	G
Y	15750843	1 to PPA_Desmond	G	A	G	G	G	G	A
Y	15750844	1 to PPA_Desmond	C	T	C	C	C	C	T
Y	15751999	1 to 2	C	A	C	A	A	A	C
Y	15752253	1 to 2	T	C	T	C	C	C	T
Y	15753466	2 to 3	G	A	G	G	A	A	G
Y	15753800	1 to PPA_Desmond	C	T	C	C	C	C	T
Y	15756688	1 to PPA_Desmond	C	T	C	C	C	C	T
Y	15757299	1 to PPA_Desmond	G	C	G	G	G	G	C
Y	15757562	1 to PPA_Desmond	A	G	A	A	A	A	G
Y	15801950	1 to 2	C	T	T	C	C	C	T
Y	15802720	1 to 2	C	T	C	T	T	T	C
Y	15802936	1 to PPA_Desmond	T	C	T	T	T	T	C
Y	15809198	1 to 2	A	C	A	C	C	C	A
Y	15809540	1 to 2	T	G,C	C	G	G	G	C
Y	15809552	2 to 3	G	A	G	G	A	A	G
Y	15813950	1 to 2	G	T	G	T	T	T	G
Y	15814648	1 to 2	C	G	C	G	G	G	C
Y	15816446	1 to 2	T	C	T	C	C	C	T
Y	15817109	1 to PPA_Desmond	C	A	C	C	C	C	A
Y	15820362	1 to PPA_Desmond	C	A	C	C	C	C	A
Y	15821522	1 to PPA_Desmond	G	A	G	G	G	G	A
Y	15826546	1 to PPA_Desmond	G	T	G	G	G	G	T
Y	15829979	2 to 3	C	T	C	C	T	T	C
Y	15830305	1 to 2	C	T	C	T	T	T	C
Y	15830586	1 to 2	A	C	A	C	C	C	A
Y	15842210	1 to 2	G	A	G	A	A	A	G
Y	15847116	1 to PPA_Desmond	C	T	C	C	C	C	T
Y	15847591	1 to PPA_Desmond	G	A	G	G	G	G	A
Y	15860377	1 to PPA_Desmond	T	C	C	C	C	C	T
Y	15866011	1 to 2	G	C	G	C	C	C	G
Y	15866080	1 to 2	A	G	A	G	G	G	A
Y	15866707	1 to PPA_Desmond	G	C	G	G	G	G	C
Y	15870093	1 to 2	C	T	C	T	T	T	C
Y	15871270	1 to PPA_Desmond	A	G	A	A	A	A	G
Y	15873212	1 to PPA_Desmond	G	A	G	G	G	G	A
Y	15873862	1 to PPA_Desmond	T	C	C	C	C	C	T
Y	15873951	1 to 2	T	A	T	A	A	A	T
Y	15875565	1 to 2	G	A	G	A	A	A	G
Y	15875746	1 to PPA_Desmond	C	A	C	C	C	C	A
Y	15876014	1 to 2	C	T	C	T	T	T	C
Y	15876574	1 to 2	A	G	A	G	G	G	A
Y	15876791	2 to PPA_Bono	C	G	C	G	C	C	C
Y	15879224	1 to 2	A	G	A	G	G	G	A
Y	15880715	1 to 2	A	G	A	G	G	G	A
Y	15900302	1 to 2	C	G	C	G	G	G	C
Y	15900603	1 to 2	T	C	T	C	C	C	T
Y	15902729	1 to PPA_Desmond	T	G	T	T	T	T	G
Y	15904275	1 to 2	T	A	T	A	A	A	T
Y	15904390	1 to 2	C	T	T	C	C	C	T
Y	15907768	1 to PPA_Desmond	G	A	G	G	G	G	A
Y	15908789	1 to 2	G	A	G	A	A	A	G
Y	15912651	1 to 2	T	A	T	A	A	A	T
Y	15914059	1 to 2	C	A	C	A	A	A	C
Y	15914488	2 to 3	G	T	G	G	T	T	G
Y	15914718	1 to PPA_Desmond	A	G	A	A	A	A	G
Y	15916207	1 to 2	G	A	G	A	A	A	G
Y	15917490	1 to 2	G	A	G	A	A	A	G
Y	15924359	1 to PPA_Desmond	G	C	G	G	G	G	C
Y	15924881	1 to PPA_Desmond	A	G	A	A	A	A	G
Y	15927946	1 to 2	T	C	T	C	C	C	T
Y	15928644	1 to 2	C	T	C	T	T	T	C
Y	15929135	1 to 2	A	G	A	G	G	G	A
Y	15930406	1 to 2	T	C	T	C	C	C	T
Y	15934526	1 to PPA_Desmond	C	T	C	C	C	C	T
Y	15936023	1 to 2	A	T	A	T	T	T	A
Y	15936156	1 to 2	G	C	G	C	C	C	G
Y	15938217	1 to PPA_Desmond	C	A	C	C	C	C	A
Y	15938870	1 to 2	A	G	A	G	G	G	A
Y	15938929	1 to 2	A	G	A	G	G	G	A
Y	15938961	2 to 3	C	T	C	C	T	T	C
Y	15939012	1 to PPA_Desmond	A	G	A	A	A	A	G
Y	15939656	1 to PPA_Desmond	C	T	C	C	C	C	T
Y	15939947	1 to 2	C	T	C	T	T	T	C
Y	15942362	1 to 2	C	T	C	T	T	T	C
Y	15948437	1 to PPA_Desmond	T	C	T	T	T	T	C
Y	15948928	1 to PPA_Desmond	A	C	A	A	A	A	C
Y	15949133	1 to PPA_Desmond	C	T	C	C	C	C	T
Y	15949521	2 to PPA_Bono	G	A	G	A	G	G	G
Y	15956452	1 to 2	T	C	T	C	C	C	T
Y	15964794	2 to PPA_Bono	G	A	G	A	G	G	G
Y	15966212	1 to PPA_Desmond	C	T	C	C	C	C	T
Y	15966678	1 to PPA_Desmond	T	C	T	T	T	T	C
Y	15966730	2 to PPA_Bono	A	G	A	G	A	A	A
Y	15968743	1 to 2	A	G	A	G	G	G	A
Y	15969653	1 to 2	G	T	G	T	T	T	G
Y	15970171	2 to PPA_Bono	T	C	T	C	T	T	T
Y	15970792	1 to 2	G	A	G	A	A	A	G
Y	15970954	1 to 2	T	C	T	C	C	C	T
Y	15971703	1 to 2	T	A	T	A	A	A	T
Y	15972127	1 to PPA_Desmond	C	T	C	C	C	C	T
Y	15972724	1 to PPA_Desmond	C	T	C	C	C	C	T
Y	15973217	1 to 2	G	C	G	C	C	C	G
Y	15973304	1 to PPA_Desmond	A	G	A	A	A	A	G
Y	15973606	1 to PPA_Desmond	C	T	C	C	C	C	T
Y	15975358	1 to PPA_Desmond	T	C	T	T	T	T	C
Y	15978178	1 to PPA_Desmond	T	G	T	T	T	T	G
Y	15978247	1 to 2	C	A	C	A	A	A	C
Y	15978402	1 to PPA_Desmond	G	T	G	G	G	G	T
Y	15978496	1 to PPA_Desmond	G	T	G	G	G	G	T
Y	15978783	1 to PPA_Desmond	A	G	A	A	A	A	G
Y	15980067	2 to PPA_Bono	T	C	T	C	T	T	T
Y	15980655	1 to 2	A	G	A	G	G	G	A
Y	15981260	1 to 2	A	G	A	G	G	G	A
Y	15981505	1 to 2	T	G	T	G	G	G	T
Y	15981979	1 to PPA_Desmond	T	C	T	T	T	T	C
Y	15991996	1 to PPA_Desmond	A	G	A	A	A	A	G
Y	15992972	1 to 2	G	A	G	A	A	A	G
Y	15997777	1 to PPA_Desmond	T	C	T	T	T	T	C
Y	15998907	2 to PPA_Bono	A	T	A	T	A	A	A
Y	15999312	1 to 2	C	A	C	A	A	A	C
Y	16017190	1 to 2	C	T	C	T	T	T	C
Y	16019284	2 to 3	C	T	C	C	T	T	C
Y	16027340	2 to PPA_Bono	T	C	T	C	T	T	T
Y	16034211	1 to PPA_Desmond	C	T	C	C	C	C	T
Y	16036778	2 to PPA_Bono	A	G	A	G	A	A	A
Y	16039104	1 to PPA_Desmond	G	A	G	G	G	G	A
Y	16039705	1 to PPA_Desmond	A	G	G	G	G	G	A
Y	16044827	1 to 2	G	A	G	A	A	A	G
Y	16046101	2 to 3	G	A	G	G	A	A	G
Y	16046315	1 to PPA_Desmond	A	G	A	A	A	A	G
Y	16049143	1 to 2	C	T	C	T	T	T	C
Y	16049205	1 to PPA_Desmond	A	G	A	A	A	A	G
Y	16049524	1 to 2	C	T	C	T	T	T	C
Y	16049528	1 to PPA_Desmond	G	C	G	G	G	G	C
Y	16049627	1 to PPA_Desmond	T	A	T	T	T	T	A
Y	16050387	1 to 2	A	G	A	G	G	G	A
Y	16051419	2 to PPA_Bono	A	C	A	C	A	A	A
Y	16054187	1 to PPA_Desmond	G	A	G	G	G	G	A
Y	16054548	2 to PPA_Bono	T	G	T	G	T	T	T
Y	16054629	2 to 3	T	C	T	T	C	C	T
Y	16054684	2 to PPA_Bono	C	A	C	A	C	C	C
Y	16057405	1 to PPA_Desmond	C	A	C	C	C	C	A
Y	16057867	1 to 2	G	A	G	A	A	A	G
Y	16059805	1 to PPA_Desmond	G	T	G	G	G	G	T
Y	16061308	1 to 2	A	G	A	G	G	G	A
Y	16062948	2 to 3	C	T	C	C	T	T	C
Y	16073348	1 to 2	C	T	C	T	T	T	C
Y	16073926	1 to PPA_Desmond	G	A	G	G	G	G	A
Y	16075408	1 to 2	C	T	C	T	T	T	C
Y	16075909	1 to 2	G	A	A	G	G	G	A
Y	16076254	2 to PPA_Bono	C	G	C	G	C	C	C
Y	16171585	1 to PPA_Desmond	G	A	G	G	G	G	A
Y	16172031	1 to PPA_Desmond	T	C	T	T	T	T	C
Y	16172584	1 to 2	C	T	T	C	C	C	T
Y	16173348	1 to PPA_Desmond	A	G	A	A	A	A	G
Y	16174167	1 to PPA_Desmond	G	A	G	G	G	G	A
Y	16175962	1 to PPA_Desmond	G	A	G	G	G	G	A
Y	16178416	2 to PPA_Bono	G	A,T	A	T	A	A	A
Y	16178880	1 to 2	G	T	G	T	T	T	G
Y	16182430	1 to PPA_Desmond	T	A	T	T	T	T	A
Y	16182548	1 to PPA_Desmond	C	T	C	C	C	C	T
Y	16183963	1 to PPA_Desmond	A	G	A	A	A	A	G
Y	16185631	1 to PPA_Desmond	C	T	C	C	C	C	T
Y	16185639	1 to 2	T	C	T	C	C	C	T
Y	16187938	2 to PPA_Bono	T	C	T	C	T	T	T
Y	16189089	2 to PPA_Bono	T	A	T	A	T	T	T
Y	16189313	2 to 3	A	T	A	A	T	T	A
Y	16189713	1 to 2	C	T	C	T	T	T	C
Y	16192040	1 to 2	T	A	T	A	A	A	T
Y	16192707	1 to PPA_Desmond	G	A	G	G	G	G	A
Y	16192964	1 to PPA_Desmond	C	G	C	C	C	C	G
Y	16193727	1 to PPA_Desmond	T	A	T	T	T	T	A
Y	16194102	1 to PPA_Desmond	C	G	G	G	G	G	C
Y	16196653	1 to 2	G	A	G	A	A	A	G
Y	16197109	1 to 2	C	A	C	A	A	A	C
Y	16199006	2 to PPA_Bono	G	A	G	A	G	G	G
Y	16200940	1 to 2	G	A	A	G	G	G	A
Y	16201707	1 to PPA_Desmond	G	C	G	G	G	G	C
Y	16203571	1 to 2	C	A	C	A	A	A	C
Y	16204841	1 to PPA_Desmond	G	C	G	G	G	G	C
Y	16205066	1 to PPA_Desmond	C	T	C	C	C	C	T
Y	16205194	1 to 2	A	G	A	G	G	G	A
Y	16205298	2 to PPA_Bono	C	T	C	T	C	C	C
Y	16212531	1 to 2	A	T	A	T	T	T	A
Y	16213559	1 to PPA_Desmond	A	T,G	T	T	T	T	G
Y	16217054	1 to PPA_Desmond	T	C	T	T	T	T	C
Y	16217411	1 to PPA_Desmond	G	T	G	G	G	G	T
Y	16217482	1 to 2	C	A	C	A	A	A	C
Y	16222421	1 to PPA_Desmond	C	T	C	C	C	C	T
Y	16226903	1 to 2	C	T	C	T	T	T	C
Y	16231673	1 to 2	C	T	C	T	T	T	C
Y	16231810	1 to 2	T	C	T	C	C	C	T
Y	16234489	1 to 2	C	T	C	T	T	T	C
Y	16237013	1 to PPA_Desmond	T	C	T	T	T	T	C
Y	16237115	1 to 2	T	C	T	C	C	C	T
Y	16238415	1 to 2	T	G	T	G	G	G	T
Y	16239370	1 to 2	G	T	G	T	T	T	G
Y	16243117	1 to 2	G	A	G	A	A	A	G
Y	16243522	1 to PPA_Desmond	T	A	T	T	T	T	A
Y	16243850	1 to 2	C	T	C	T	T	T	C
Y	16246748	1 to PPA_Desmond	C	T	C	C	C	C	T
Y	16246996	1 to PPA_Desmond	A	G	A	A	A	A	G
Y	16248374	1 to PPA_Desmond	A	T	A	A	A	A	T
Y	16248759	1 to PPA_Desmond	G	A	G	G	G	G	A
Y	16249466	1 to 2	C	G	C	G	G	G	C
Y	16249698	1 to PPA_Desmond	G	A	G	G	G	G	A
Y	16249767	1 to PPA_Desmond	A	G	G	G	G	G	A
Y	16252044	2 to PPA_Bono	G	A	G	A	G	G	G
Y	16256401	1 to 2	T	A	T	A	A	A	T
Y	16257399	2 to 3	A	G	A	A	G	G	A
Y	16258613	1 to PPA_Desmond	C	A	C	C	C	C	A
Y	16258922	1 to 2	C	T	C	T	T	T	C
Y	16259062	2 to PPA_Bono	G	A	G	A	G	G	G
Y	16260034	1 to PPA_Desmond	C	G	C	C	C	C	G
Y	16260161	1 to 2	T	C	T	C	C	C	T
Y	16262627	1 to PPA_Desmond	C	A	C	C	C	C	A
Y	16264063	1 to PPA_Desmond	A	G	A	A	A	A	G
Y	16268764	1 to 2	C	T	C	T	T	T	C
Y	16269934	1 to PPA_Desmond	G	C	G	G	G	G	C
Y	16280116	1 to 2	C	A	C	A	A	A	C
Y	16280801	1 to PPA_Desmond	C	T	C	C	C	C	T
Y	16281089	1 to 2	C	T	C	T	T	T	C
Y	16282091	1 to PPA_Desmond	T	G	T	T	T	T	G
Y	16282944	1 to PPA_Desmond	A	C	A	A	A	A	C
Y	16283805	2 to 3	C	G	C	C	G	G	C
Y	16284084	1 to PPA_Desmond	G	A	G	G	G	G	A
Y	16285281	1 to 2	C	T	C	T	T	T	C
Y	16285999	1 to PPA_Desmond	A	C	A	A	A	A	C
Y	16286012	1 to 2	C	G	C	G	G	G	C
Y	16287098	1 to PPA_Desmond	T	C	T	T	T	T	C
Y	16287454	1 to 2	C	T	C	T	T	T	C
Y	16287907	1 to PPA_Desmond	C	G	C	C	C	C	G
Y	16288272	1 to 2	C	G	C	G	G	G	C
Y	16289748	1 to PPA_Desmond	G	A	G	G	G	G	A
Y	16289768	1 to PPA_Desmond	G	C,T	C	C	C	C	T
Y	16293969	1 to 2	C	A	C	A	A	A	C
Y	16304194	1 to PPA_Desmond	A	G	A	A	A	A	G
Y	16309938	1 to PPA_Desmond	G	A	G	G	G	G	A
Y	16310082	1 to 2	C	A	C	A	A	A	C
Y	16316352	1 to PPA_Desmond	C	T	T	T	T	T	C
Y	16324514	1 to 2	A	G	A	G	G	G	A
Y	16326824	1 to 2	G	A	G	A	A	A	G
Y	16326910	1 to 2	C	A	C	A	A	A	C
Y	16326953	1 to 2	A	G	A	G	G	G	A
Y	16327805	1 to PPA_Desmond	G	A	G	G	G	G	A
Y	16328972	1 to PPA_Desmond	T	C	T	T	T	T	C
Y	16331158	1 to PPA_Desmond	A	T	A	A	A	A	T
Y	16331628	1 to PPA_Desmond	T	C	T	T	T	T	C
Y	16331914	1 to PPA_Desmond	C	A	C	C	C	C	A
Y	16332021	1 to PPA_Desmond	C	A	C	C	C	C	A
Y	16332711	1 to PPA_Desmond	G	A	G	G	G	G	A
Y	16335994	2 to PPA_Bono	A	T	A	T	A	A	A
Y	16336181	1 to 2	A	G	A	G	G	G	A
Y	16338526	2 to PPA_Bono	G	T	G	T	G	G	G
Y	16338936	1 to 2	C	T	T	C	C	C	T
Y	16339744	2 to PPA_Bono	A	G,T	G	T	G	G	G
Y	16340814	1 to PPA_Desmond	T	A	T	T	T	T	A
Y	16340815	1 to 2	A	T	A	T	T	T	A
Y	16345230	1 to PPA_Desmond	C	A	C	C	C	C	A
Y	16345372	1 to PPA_Desmond	T	A	T	T	T	T	A
Y	16346427	1 to PPA_Desmond	A	T	A	A	A	A	T
Y	16347264	1 to PPA_Desmond	T	A	T	T	T	T	A
Y	16347418	1 to 2	C	T	C	T	T	T	C
Y	16349487	1 to PPA_Desmond	C	T	C	C	C	C	T
Y	16349787	1 to 2	A	G	G	A	A	A	G
Y	16350389	1 to 2	A	G	A	G	G	G	A
Y	16350867	1 to PPA_Desmond	C	G	C	C	C	C	G
Y	16357619	1 to 2	A	G	A	G	G	G	A
Y	16358460	1 to PPA_Desmond	A	C	A	A	A	A	C
Y	16358648	1 to PPA_Desmond	T	C	T	T	T	T	C
Y	16360100	1 to 2	C	T	T	C	C	C	T
Y	16361620	1 to PPA_Desmond	G	T	G	G	G	G	T
Y	16361796	1 to 2	T	A	T	A	A	A	T
Y	16362341	2 to 3	G	A	G	G	A	A	G
Y	16362343	1 to PPA_Desmond	T	G	T	T	T	T	G
Y	16364841	1 to PPA_Desmond	G	A	G	G	G	G	A
Y	16368541	1 to 2	A	G	A	G	G	G	A
Y	16370253	1 to 2	G	A	G	A	A	A	G
Y	16372510	1 to PPA_Desmond	C	T	C	C	C	C	T
Y	16374979	1 to PPA_Desmond	A	G	A	A	A	A	G
Y	16376718	1 to 2	C	T	C	T	T	T	C
Y	16377346	1 to PPA_Desmond	A	C	A	A	A	A	C
Y	16377711	1 to 2	T	C	T	C	C	C	T
Y	16377742	1 to PPA_Desmond	C	A	C	C	C	C	A
Y	16377957	1 to PPA_Desmond	A	G	A	A	A	A	G
Y	16377986	1 to PPA_Desmond	C	T	C	C	C	C	T
Y	16385219	1 to PPA_Desmond	T	C	T	T	T	T	C
Y	16389269	1 to PPA_Desmond	C	T	C	C	C	C	T
Y	16390233	1 to PPA_Desmond	C	T	C	C	C	C	T
Y	16391370	1 to 2	T	C	T	C	C	C	T
Y	16391623	1 to PPA_Desmond	C	G	C	C	C	C	G
Y	16400306	1 to PPA_Desmond	T	C	T	T	T	T	C
Y	16404135	1 to PPA_Desmond	G	T	G	G	G	G	T
Y	16404350	1 to PPA_Desmond	T	C	C	C	C	C	T
Y	16404752	1 to 2	C	T	C	T	T	T	C
Y	16407143	1 to PPA_Desmond	C	T	T	T	T	T	C
Y	16407343	1 to 2	C	A,G	G	A	A	A	G
Y	16417188	1 to 2	G	T	G	T	T	T	G
Y	16417783	1 to PPA_Desmond	A	G	A	A	A	A	G
Y	16418882	1 to 2	T	A	T	A	A	A	T
Y	16420758	1 to PPA_Desmond	T	C	T	T	T	T	C
Y	16421009	1 to 2	C	T	C	T	T	T	C
Y	16435124	1 to 2	A	T	A	T	T	T	A
Y	16435467	1 to 2	G	A	G	A	A	A	G
Y	16436627	1 to PPA_Desmond	A	T	A	A	A	A	T
Y	16436915	1 to PPA_Desmond	G	A	G	G	G	G	A
Y	16437291	1 to 2	T	C	T	C	C	C	T
Y	16438153	1 to 2	G	A	G	A	A	A	G
Y	16438474	1 to PPA_Desmond	C	T	C	C	C	C	T
Y	16438520	1 to 2	A	G	A	G	G	G	A
Y	16440031	1 to 2	G	A	G	A	A	A	G
Y	16440364	1 to PPA_Desmond	A	C,G	C	C	C	C	G
Y	16441591	1 to PPA_Desmond	G	A	G	G	G	G	A
Y	16441616	1 to 2	G	A	G	A	A	A	G
Y	16441717	1 to 2	A	G	A	G	G	G	A
Y	16441862	2 to 3	A	G	A	A	G	G	A
Y	16442284	1 to PPA_Desmond	T	A	T	T	T	T	A
Y	16445618	1 to 2	C	T	C	T	T	T	C
Y	16446002	1 to PPA_Desmond	A	T	A	A	A	A	T
Y	16448669	1 to PPA_Desmond	A	G	A	A	A	A	G
Y	16452664	2 to 3	A	G	G	G	A	A	G
Y	16472140	1 to 2	T	C	T	C	C	C	T
Y	16472143	2 to 3	C	T	C	C	T	T	C
Y	16474242	1 to 2	G	A	G	A	A	A	G
Y	16474272	1 to PPA_Desmond	G	T	G	G	G	G	T
Y	16475685	1 to 2	T	C	T	C	C	C	T
Y	16476840	1 to PPA_Desmond	A	T	A	A	A	A	T
Y	16477299	1 to PPA_Desmond	A	G	A	A	A	A	G
Y	16477407	1 to PPA_Desmond	C	T	C	C	C	C	T
Y	16477757	1 to 2	G	A	G	A	A	A	G
Y	16478793	1 to PPA_Desmond	A	C	A	A	A	A	C
Y	16479775	1 to PPA_Desmond	C	G	C	C	C	C	G
Y	16481884	1 to PPA_Desmond	G	T	G	G	G	G	T
Y	16485096	1 to PPA_Desmond	T	C	T	T	T	T	C
Y	16486274	1 to 2	A	C	A	C	C	C	A
Y	16494457	1 to 2	T	C	T	C	C	C	T
Y	16495855	1 to 2	A	G	A	G	G	G	A
Y	16496290	2 to PPA_Bono	G	T	G	T	G	G	G
Y	16505099	2 to PPA_Bono	C	T	C	T	C	C	C
Y	16505163	1 to PPA_Desmond	C	T	C	C	C	C	T
Y	16512292	1 to PPA_Desmond	G	A	G	G	G	G	A
Y	16512488	1 to PPA_Desmond	G	A	G	G	G	G	A
Y	16520105	1 to PPA_Desmond	A	G	A	A	A	A	G
Y	16522135	1 to 2	C	T	C	T	T	T	C
Y	16522248	1 to 2	A	C	A	C	C	C	A
Y	16522262	1 to 2	A	G	A	G	G	G	A
Y	16523276	1 to 2	G	A	G	A	A	A	G
Y	16524255	1 to 2	A	G	A	G	G	G	A
Y	16527141	1 to 2	T	A	T	A	A	A	T
Y	16530349	1 to 2	C	T	C	T	T	T	C
Y	16530392	1 to PPA_Desmond	A	C	A	A	A	A	C
Y	16535918	1 to PPA_Desmond	A	C	A	A	A	A	C
Y	16536581	1 to PPA_Desmond	C	T	C	C	C	C	T
Y	16537343	1 to PPA_Desmond	A	G	A	A	A	A	G
Y	16537348	1 to PPA_Desmond	A	G	A	A	A	A	G
Y	16537930	2 to PPA_Bono	A	G	A	G	A	A	A
Y	16542813	1 to 2	G	A	G	A	A	A	G
Y	16545388	1 to PPA_Desmond	T	C	T	T	T	T	C
Y	16547766	1 to PPA_Desmond	G	A	G	G	G	G	A
Y	16550089	1 to PPA_Desmond	G	A	G	G	G	G	A
Y	16550181	1 to 2	G	A	G	A	A	A	G
Y	16553128	1 to PPA_Desmond	G	C	G	G	G	G	C
Y	16553727	1 to 2	G	T	G	T	T	T	G
Y	16554108	1 to 2	A	C	A	C	C	C	A
Y	16555648	1 to 2	C	T	C	T	T	T	C
Y	16555713	1 to PPA_Desmond	C	A	C	C	C	C	A
Y	16556759	1 to PPA_Desmond	C	T	C	C	C	C	T
Y	16558335	1 to 2	T	C	T	C	C	C	T
Y	16559622	2 to 3	T	C	T	T	C	C	T
Y	16565384	1 to 2	C	T	C	T	T	T	C
Y	16567147	1 to PPA_Desmond	G	A	G	G	G	G	A
Y	16567196	1 to 2	C	T	T	C	C	C	T
Y	16568780	1 to PPA_Desmond	C	T	C	C	C	C	T
Y	16568830	2 to 3	C	T	C	C	T	T	C
Y	16569417	1 to PPA_Desmond	A	T	A	A	A	A	T
Y	16570008	1 to PPA_Desmond	C	A	C	C	C	C	A
Y	16570623	1 to 2	C	T	C	T	T	T	C
Y	16570640	1 to PPA_Desmond	G	T	G	G	G	G	T
Y	16571999	1 to 2	T	C	T	C	C	C	T
Y	16576300	1 to PPA_Desmond	T	C	T	T	T	T	C
Y	16577841	1 to PPA_Desmond	T	A	T	T	T	T	A
Y	16578028	2 to 3	T	C	T	T	C	C	T
Y	16579637	1 to PPA_Desmond	G	A	G	G	G	G	A
Y	16583696	1 to PPA_Desmond	T	A	T	T	T	T	A
Y	16586335	1 to PPA_Desmond	T	A	T	T	T	T	A
Y	16589494	1 to PPA_Desmond	A	G	G	G	G	G	A
Y	16591865	1 to PPA_Desmond	A	G	A	A	A	A	G
Y	16592632	1 to 2	T	C	T	C	C	C	T
Y	16594915	1 to 2	C	T	C	T	T	T	C
Y	16596642	1 to PPA_Desmond	G	A	G	G	G	G	A
Y	16597758	1 to PPA_Desmond	A	G	A	A	A	A	G
Y	16597969	1 to PPA_Desmond	C	A	C	C	C	C	A
Y	16599092	1 to PPA_Desmond	T	C	T	T	T	T	C
Y	16599408	1 to PPA_Desmond	A	C	A	A	A	A	C
Y	16600293	1 to PPA_Desmond	T	C	T	T	T	T	C
Y	16601133	1 to PPA_Desmond	T	C	T	T	T	T	C
Y	16603866	1 to PPA_Desmond	A	G	A	A	A	A	G
Y	16604822	1 to PPA_Desmond	G	C	G	G	G	G	C
Y	16605130	1 to 2	T	G	T	G	G	G	T
Y	16605340	1 to PPA_Desmond	A	G	A	A	A	A	G
Y	16606548	1 to 2	C	A	C	A	A	A	C
Y	16607000	1 to 2	G	A	G	A	A	A	G
Y	16607086	2 to PPA_Bono	T	C	T	C	T	T	T
Y	16607372	1 to PPA_Desmond	G	A	G	G	G	G	A
Y	16607534	1 to 2	A	G	A	G	G	G	A
Y	16608184	2 to 3	A	G	A	A	G	G	A
Y	16609367	1 to 2	C	G	C	G	G	G	C
Y	16609741	1 to 2	A	C	A	C	C	C	A
Y	16609908	1 to 2	C	T	C	T	T	T	C
Y	16610308	1 to 2	G	A	G	A	A	A	G
Y	16610504	2 to 3	G	C	G	G	C	C	G
Y	16610799	1 to 2	A	G	A	G	G	G	A
Y	16610851	1 to 2	G	A	G	A	A	A	G
Y	16611077	1 to 2	A	G	A	G	G	G	A
Y	16614240	2 to PPA_Bono	G	T	G	T	G	G	G
Y	16615106	1 to 2	G	A	G	A	A	A	G
Y	16626465	1 to PPA_Desmond	A	C	A	A	A	A	C
Y	16628405	1 to PPA_Desmond	G	T	G	G	G	G	T
Y	16629166	1 to PPA_Desmond	G	A	G	G	G	G	A
Y	16632381	1 to PPA_Desmond	T	C	T	T	T	T	C
Y	16632651	1 to 2	G	A	G	A	A	A	G
Y	16632654	1 to 2	T	C	T	C	C	C	T
Y	16633441	1 to 2	G	A	G	A	A	A	G
Y	16634184	1 to 2	A	C	A	C	C	C	A
Y	16634727	2 to PPA_Bono	C	T	C	T	C	C	C
Y	16635526	1 to PPA_Desmond	G	A	G	G	G	G	A
Y	16635619	1 to 2	T	A	T	A	A	A	T
Y	16635713	1 to PPA_Desmond	C	T	C	C	C	C	T
Y	16637383	1 to PPA_Desmond	G	C	G	G	G	G	C
Y	16637785	1 to PPA_Desmond	G	A	G	G	G	G	A
Y	16638003	1 to PPA_Desmond	G	C	G	G	G	G	C
Y	16639728	1 to 2	G	C	C	G	G	G	C
Y	16643964	1 to 2	C	T	T	C	C	C	T
Y	16644405	1 to PPA_Desmond	G	C	G	G	G	G	C
Y	16646564	1 to PPA_Desmond	G	A	G	G	G	G	A
Y	16655823	2 to 3	T	G	T	T	G	G	T
Y	16660479	1 to PPA_Desmond	C	A	C	C	C	C	A
Y	16661650	1 to PPA_Desmond	A	G	A	A	A	A	G
Y	16665731	1 to PPA_Desmond	C	A	C	C	C	C	A
Y	16666063	1 to PPA_Desmond	T	A	T	T	T	T	A
Y	16671332	1 to 2	T	C	T	C	C	C	T
Y	16671486	1 to 2	G	A	G	A	A	A	G
Y	16673012	2 to 3	C	T	C	C	T	T	C
Y	16678784	1 to 2	C	G	C	G	G	G	C
Y	16678889	1 to PPA_Desmond	C	A	C	C	C	C	A
Y	16679670	1 to PPA_Desmond	G	C	G	G	G	G	C
Y	16679918	1 to 2	C	T	T	C	C	C	T
Y	16679954	1 to PPA_Desmond	A	G	A	A	A	A	G
Y	16680558	2 to 3	T	A	T	T	A	A	T
Y	16680979	2 to 3	G	T	G	G	T	T	G
Y	16688418	1 to 2	C	G	C	G	G	G	C
Y	16688428	1 to PPA_Desmond	G	A	G	G	G	G	A
Y	16688545	1 to PPA_Desmond	G	A	A	A	A	A	G
Y	16688653	1 to PPA_Desmond	G	C	G	G	G	G	C
Y	16694349	1 to PPA_Desmond	T	C	T	T	T	T	C
Y	16697597	1 to PPA_Desmond	G	T	G	G	G	G	T
Y	16697833	1 to 2	G	A	G	A	A	A	G
Y	16699418	1 to PPA_Desmond	C	A	C	C	C	C	A
Y	16712573	1 to 2	G	A	G	A	A	A	G
Y	16712661	1 to 2	C	T	T	C	C	C	T
Y	16713693	1 to 2	G	A	G	A	A	A	G
Y	16715568	1 to PPA_Desmond	A	G	A	A	A	A	G
Y	16716500	1 to 2	A	T	A	T	T	T	A
Y	16716771	2 to PPA_Bono	T	C	T	C	T	T	T
Y	16718204	1 to 2	C	T	C	T	T	T	C
Y	16732019	1 to PPA_Desmond	A	G	A	A	A	A	G
Y	16732709	1 to 2	G	A	G	A	A	A	G
Y	16740331	1 to 2	C	G	C	G	G	G	C
Y	16740551	1 to PPA_Desmond	G	A	G	G	G	G	A
Y	16740885	2 to PPA_Bono	T	C	T	C	T	T	T
Y	16740982	1 to 2	T	G	T	G	G	G	T
Y	16741141	2 to PPA_Bono	C	T	C	T	C	C	C
Y	16742046	1 to 2	G	T	G	T	T	T	G
Y	16742075	1 to PPA_Desmond	G	A	G	G	G	G	A
Y	16742285	1 to PPA_Desmond	C	A	C	C	C	C	A
Y	16743247	2 to PPA_Bono	G	T	G	T	G	G	G
Y	16743970	2 to PPA_Bono	T	C	T	C	T	T	T
Y	16744749	1 to PPA_Desmond	T	C	T	T	T	T	C
Y	16744865	1 to 2	A	G	A	G	G	G	A
Y	16745644	1 to 2	A	C	A	C	C	C	A
Y	16746197	1 to 2	T	C	T	C	C	C	T
Y	16746889	1 to PPA_Desmond	T	A	T	T	T	T	A
Y	16748122	1 to PPA_Desmond	C	T	C	C	C	C	T
Y	16748999	1 to PPA_Desmond	G	A	G	G	G	G	A
Y	16749670	1 to 2	G	T	G	T	T	T	G
Y	16752041	1 to 2	G	A	G	A	A	A	G
Y	16752062	1 to 2	C	A	C	A	A	A	C
Y	16753830	1 to PPA_Desmond	A	G	A	A	A	A	G
Y	16754399	1 to PPA_Desmond	A	G	A	A	A	A	G
Y	16755619	2 to PPA_Bono	T	C	T	C	T	T	T
Y	16757273	1 to PPA_Desmond	C	T	C	C	C	C	T
Y	16757497	1 to 2	G	A	G	A	A	A	G
Y	16757750	1 to PPA_Desmond	T	G	T	T	T	T	G
Y	16759222	1 to 2	T	G,A	A	G	G	G	A
Y	16761145	1 to PPA_Desmond	T	C	T	T	T	T	C
Y	16761630	1 to 2	C	T	C	T	T	T	C
Y	16761772	1 to 2	T	C	T	C	C	C	T
Y	16762188	1 to PPA_Desmond	A	T	A	A	A	A	T
Y	16762432	1 to 2	C	T	C	T	T	T	C
Y	16762441	1 to PPA_Desmond	A	G	A	A	A	A	G
Y	16762995	1 to PPA_Desmond	G	A	G	G	G	G	A
Y	16763126	1 to PPA_Desmond	C	T	C	C	C	C	T
Y	16767338	1 to PPA_Desmond	G	C	G	G	G	G	C
Y	16767813	1 to PPA_Desmond	G	T	G	G	G	G	T
Y	16769816	1 to PPA_Desmond	G	A	G	G	G	G	A
Y	16772645	1 to PPA_Desmond	T	G	T	T	T	T	G
Y	16772982	1 to PPA_Desmond	A	G	A	A	A	A	G
Y	16774082	1 to PPA_Desmond	G	A	G	G	G	G	A
Y	16775996	1 to PPA_Desmond	T	C	T	T	T	T	C
Y	16776016	1 to PPA_Desmond	G	A	G	G	G	G	A
Y	16776394	1 to 2	A	G	A	G	G	G	A
Y	16776631	1 to 2	A	G	A	G	G	G	A
Y	16778800	1 to PPA_Desmond	C	A	C	C	C	C	A
Y	16780223	1 to PPA_Desmond	A	T	A	A	A	A	T
Y	16780242	1 to PPA_Desmond	G	C	G	G	G	G	C
Y	16781125	1 to PPA_Desmond	C	T	C	C	C	C	T
Y	16781756	1 to PPA_Desmond	G	A	G	G	G	G	A
Y	16782577	2 to 3	A	G	A	A	G	G	A
Y	16782791	1 to 2	C	G	C	G	G	G	C
Y	16783382	1 to PPA_Desmond	G	A	G	G	G	G	A
Y	16787036	1 to 2	C	T	C	T	T	T	C
Y	16788877	1 to PPA_Desmond	G	A	G	G	G	G	A
Y	16788926	1 to 2	T	C	T	C	C	C	T
Y	16789200	1 to 2	C	A	C	A	A	A	C
Y	16789779	1 to 2	T	C	T	C	C	C	T
Y	16790630	2 to 3	C	T	C	C	T	T	C
Y	16792068	2 to 3	G	C	C	C	G	G	C
Y	16792318	1 to PPA_Desmond	T	C	T	T	T	T	C
Y	16793484	1 to 2	C	T	C	T	T	T	C
Y	16793501	1 to PPA_Desmond	C	A	C	C	C	C	A
Y	16795716	1 to PPA_Desmond	A	G	A	A	A	A	G
Y	16797034	1 to 2	C	G	C	G	G	G	C
Y	16797091	1 to 2	C	G	C	G	G	G	C
Y	16797149	1 to 2	T	A,G	G	A	A	A	G
Y	16797334	1 to 2	T	C	T	C	C	C	T
Y	16798192	1 to 2	T	C	T	C	C	C	T
Y	16801840	1 to PPA_Desmond	C	T	C	C	C	C	T
Y	16804391	2 to PPA_Bono	C	T	C	T	C	C	C
Y	16804710	1 to PPA_Desmond	T	G	T	T	T	T	G
Y	16804711	1 to PPA_Desmond	C	T	C	C	C	C	T
Y	16805847	1 to PPA_Desmond	C	T	C	C	C	C	T
Y	16825988	2 to PPA_Bono	A	G	A	G	A	A	A
Y	16830038	1 to 2	A	G	A	G	G	G	A
Y	16830082	1 to PPA_Desmond	C	T	C	C	C	C	T
Y	16833351	1 to 2	C	T	T	C	C	C	T
Y	16833947	1 to PPA_Desmond	G	A	G	G	G	G	A
Y	16835442	1 to 2	T	A	T	A	A	A	T
Y	16837393	1 to 2	C	T	C	T	T	T	C
Y	16839018	1 to 2	G	C	G	C	C	C	G
Y	16841031	1 to 2	C	T	T	C	C	C	T
Y	16841512	1 to PPA_Desmond	C	A	C	C	C	C	A
Y	16841535	1 to 2	A	C,G	G	C	C	C	G
Y	16841586	1 to 2	G	T	G	T	T	T	G
Y	16844408	1 to 2	G	T	G	T	T	T	G
Y	16844873	1 to PPA_Desmond	T	C	T	T	T	T	C
Y	16849458	1 to PPA_Desmond	G	A	G	G	G	G	A
Y	16849482	1 to 2	T	C	T	C	C	C	T
Y	16850721	1 to 2	C	A	C	A	A	A	C
Y	16851757	1 to 2	G	A	G	A	A	A	G
Y	16851812	1 to PPA_Desmond	C	T	T	T	T	T	C
Y	16853301	1 to PPA_Desmond	T	G	T	T	T	T	G
Y	16855832	1 to PPA_Desmond	G	A	G	G	G	G	A
Y	16857695	1 to PPA_Desmond	G	T	G	G	G	G	T
Y	16860664	1 to 2	A	G	A	G	G	G	A
Y	16861328	1 to 2	A	G	A	G	G	G	A
Y	16861367	1 to 2	T	C	T	C	C	C	T
Y	16862105	1 to 2	G	A	G	A	A	A	G
Y	16862665	1 to PPA_Desmond	A	G	A	A	A	A	G
Y	16869381	1 to 2	T	A	T	A	A	A	T
Y	16872087	1 to 2	A	G	A	G	G	G	A
Y	16873221	1 to 2	T	C	T	C	C	C	T
Y	16873939	1 to PPA_Desmond	G	A	G	G	G	G	A
Y	16879301	1 to PPA_Desmond	T	C	T	T	T	T	C
Y	16888111	1 to 2	T	C	C	T	T	T	C
Y	16891359	1 to PPA_Desmond	T	C	T	T	T	T	C
Y	16896962	1 to 2	T	C	C	T	T	T	C
Y	16898288	1 to PPA_Desmond	G	C	G	G	G	G	C
Y	16898953	1 to 2	C	G	C	G	G	G	C
Y	16901203	1 to 2	C	T	C	T	T	T	C
Y	16902529	1 to PPA_Desmond	C	G	C	C	C	C	G
Y	16903204	1 to 2	C	G	C	G	G	G	C
Y	16903943	1 to 2	T	C	T	C	C	C	T
Y	16904141	2 to PPA_Bono	A	G	A	G	A	A	A
Y	16904457	2 to 3	C	T	C	C	T	T	C
Y	16907884	1 to PPA_Desmond	C	T	C	C	C	C	T
Y	16912464	1 to 2	A	C	C	A	A	A	C
Y	16915521	1 to 2	T	G	T	G	G	G	T
Y	16916413	1 to 2	A	G	A	G	G	G	A
Y	16916539	1 to PPA_Desmond	C	A	C	C	C	C	A
Y	16917946	1 to 2	C	T	C	T	T	T	C
Y	16918909	1 to PPA_Desmond	G	A	G	G	G	G	A
Y	16919308	1 to PPA_Desmond	T	C	T	T	T	T	C
Y	16920127	1 to PPA_Desmond	A	G	G	G	G	G	A
Y	16920213	1 to PPA_Desmond	T	C	T	T	T	T	C
Y	16920759	1 to PPA_Desmond	C	T	C	C	C	C	T
Y	16921463	1 to PPA_Desmond	C	T	T	T	T	T	C
Y	16922008	1 to PPA_Desmond	A	T	A	A	A	A	T
Y	16922301	1 to 2	C	T	C	T	T	T	C
Y	16925962	1 to 2	C	T	C	T	T	T	C
Y	16933979	1 to PPA_Desmond	T	A	T	T	T	T	A
Y	16934380	1 to PPA_Desmond	T	C	T	T	T	T	C
Y	16935075	1 to PPA_Desmond	C	T	C	C	C	C	T
Y	16942742	2 to PPA_Bono	T	C	T	C	T	T	T
Y	16946014	1 to 2	C	T	T	C	C	C	T
Y	16946732	1 to 2	C	G	G	C	C	C	G
Y	16947060	1 to 2	A	T	A	T	T	T	A
Y	16947728	1 to PPA_Desmond	G	A	G	G	G	G	A
Y	16948692	1 to 2	C	T	C	T	T	T	C
Y	16950069	1 to 2	G	A	G	A	A	A	G
Y	16951060	2 to 3	C	T	C	C	T	T	C
Y	16951832	2 to PPA_Bono	T	G	T	G	T	T	T
Y	16954092	1 to PPA_Desmond	A	G	A	A	A	A	G
Y	16954584	1 to PPA_Desmond	A	G	G	G	G	G	A
Y	16955131	1 to PPA_Desmond	A	G	A	A	A	A	G
Y	16955797	1 to 2	G	A	G	A	A	A	G
Y	16956226	1 to PPA_Desmond	A	G	A	A	A	A	G
Y	16959489	1 to PPA_Desmond	G	A	G	G	G	G	A
Y	16959831	1 to PPA_Desmond	C	G	C	C	C	C	G
Y	16962548	1 to 2	C	G	C	G	G	G	C
Y	16963971	1 to PPA_Desmond	G	T	G	G	G	G	T
Y	16965317	1 to PPA_Desmond	T	C	T	T	T	T	C
Y	16965619	1 to PPA_Desmond	C	T	C	C	C	C	T
Y	16966363	1 to 2	T	C	T	C	C	C	T
Y	16967300	2 to PPA_Bono	G	A	G	A	G	G	G
Y	16967439	1 to 2	A	G	A	G	G	G	A
Y	16968894	1 to 2	G	A	A	G	G	G	A
Y	16969701	1 to PPA_Desmond	G	A	A	A	A	A	G
Y	16970198	1 to PPA_Desmond	C	T	C	C	C	C	T
Y	16970219	1 to PPA_Desmond	G	A	A	A	A	A	G
Y	16988026	1 to 2	G	A	G	A	A	A	G
Y	16988790	1 to PPA_Desmond	T	C	T	T	T	T	C
Y	16989231	1 to 2	T	C	T	C	C	C	T
Y	16990435	1 to PPA_Desmond	T	G	T	T	T	T	G
Y	16991570	1 to 2	T	C	T	C	C	C	T
Y	17006123	1 to PPA_Desmond	T	G	T	T	T	T	G
Y	17007481	1 to PPA_Desmond	A	T,C	T	T	T	T	C
Y	17007826	1 to 2	A	G	A	G	G	G	A
Y	17007975	1 to 2	G	T	G	T	T	T	G
Y	17008475	1 to 2	G	A	G	A	A	A	G
Y	17008944	1 to PPA_Desmond	G	A	G	G	G	G	A
Y	17009349	2 to PPA_Bono	G	A	G	A	G	G	G
Y	17009363	1 to 2	G	A	G	A	A	A	G
Y	17009728	1 to 2	G	A	A	G	G	G	A
Y	17011383	1 to 2	C	T	C	T	T	T	C
Y	17011537	1 to 2	A	G	A	G	G	G	A
Y	17012826	1 to 2	A	T	A	T	T	T	A
Y	17013002	2 to 3	T	G	T	T	G	G	T
Y	17014680	1 to 2	G	A	G	A	A	A	G
Y	17015356	1 to 2	T	C	T	C	C	C	T
Y	17015661	1 to 2	T	A	T	A	A	A	T
Y	17015872	1 to 2	T	C	T	C	C	C	T
Y	17017681	1 to 2	T	C	T	C	C	C	T
Y	17018594	1 to PPA_Desmond	T	C	T	T	T	T	C
Y	17019519	1 to PPA_Desmond	G	A	G	G	G	G	A
Y	17020367	1 to PPA_Desmond	A	T	A	A	A	A	T
Y	17020706	2 to PPA_Bono	G	T	G	T	G	G	G
Y	17028715	1 to PPA_Desmond	T	C	T	T	T	T	C
Y	17030005	1 to 2	C	T	T	C	C	C	T
Y	17030042	1 to PPA_Desmond	C	T	T	T	T	T	C
Y	17031922	1 to PPA_Desmond	C	G	C	C	C	C	G
Y	17033246	1 to 2	C	T	T	C	C	C	T
Y	17034538	1 to 2	G	A	A	G	G	G	A
Y	17037953	1 to 2	C	G	C	G	G	G	C
Y	17038025	1 to PPA_Desmond	C	G	C	C	C	C	G
Y	17038160	1 to PPA_Desmond	A	C	A	A	A	A	C
Y	17042050	1 to PPA_Desmond	G	A	G	G	G	G	A
Y	17044228	1 to PPA_Desmond	T	A	T	T	T	T	A
Y	17047704	1 to 2	A	T	A	T	T	T	A
Y	17050268	1 to PPA_Desmond	C	T	C	C	C	C	T
Y	17050414	1 to 2	A	G	A	G	G	G	A
Y	17053177	1 to 2	G	A	G	A	A	A	G
Y	17057033	1 to PPA_Desmond	T	C	C	C	C	C	T
Y	17072259	1 to 2	C	T	C	T	T	T	C
Y	17072796	1 to PPA_Desmond	C	G	G	G	G	G	C
Y	17075816	2 to PPA_Bono	C	G	C	G	C	C	C
Y	17077674	1 to PPA_Desmond	A	G	A	A	A	A	G
Y	17078105	1 to 2	G	T	G	T	T	T	G
Y	17079662	1 to PPA_Desmond	G	A	G	G	G	G	A
Y	17080811	1 to 2	A	G	A	G	G	G	A
Y	17082615	1 to PPA_Desmond	T	C	T	T	T	T	C
Y	17105519	1 to PPA_Desmond	A	T	A	A	A	A	T
Y	17106156	1 to PPA_Desmond	G	A	G	G	G	G	A
Y	17106443	1 to PPA_Desmond	T	G	T	T	T	T	G
Y	17107732	2 to PPA_Bono	G	A	G	A	G	G	G
Y	17108677	1 to PPA_Desmond	G	A	A	A	A	A	G
Y	17110550	1 to 2	C	A	C	A	A	A	C
Y	17112841	1 to PPA_Desmond	T	C	C	C	C	C	T
Y	17115621	1 to PPA_Desmond	A	G	A	A	A	A	G
Y	17115891	1 to 2	C	G	G	C	C	C	G
Y	17117094	1 to PPA_Desmond	T	C	T	T	T	T	C
Y	17136629	1 to PPA_Desmond	T	C	T	T	T	T	C
Y	17137097	1 to PPA_Desmond	G	T	G	G	G	G	T
Y	17137158	1 to PPA_Desmond	G	A	G	G	G	G	A
Y	17138198	1 to PPA_Desmond	C	G	C	C	C	C	G
Y	17140362	1 to PPA_Desmond	T	C	C	C	C	C	T
Y	17141086	1 to PPA_Desmond	G	A	G	G	G	G	A
Y	17141342	1 to 2	A	G	G	A	A	A	G
Y	17141502	1 to 2	C	T	T	C	C	C	T
Y	17144372	1 to PPA_Desmond	A	G	A	A	A	A	G
Y	17144696	1 to PPA_Desmond	G	A	G	G	G	G	A
Y	17147814	1 to PPA_Desmond	G	C	G	G	G	G	C
Y	17147941	1 to 2	A	G	A	G	G	G	A
Y	17148103	1 to PPA_Desmond	G	A	G	G	G	G	A
Y	17148983	1 to PPA_Desmond	A	G	G	G	G	G	A
Y	17150135	1 to 2	C	T	T	C	C	C	T
Y	17150286	1 to 2	C	T	T	C	C	C	T
Y	17150802	1 to 2	G	A	G	A	A	A	G
Y	17150940	1 to PPA_Desmond	G	T	T	T	T	T	G
Y	17151636	2 to 3	T	A	T	T	A	A	T
Y	17152284	1 to PPA_Desmond	T	C	T	T	T	T	C
Y	17165590	1 to 2	T	C	T	C	C	C	T
Y	17167096	1 to 2	T	G	T	G	G	G	T
Y	17167551	1 to 2	A	C	A	C	C	C	A
Y	17168068	1 to 2	G	A	A	G	G	G	A
Y	17170681	1 to PPA_Desmond	A	G	A	A	A	A	G
Y	17170684	1 to PPA_Desmond	G	T	G	G	G	G	T
Y	17170719	1 to PPA_Desmond	C	T	C	C	C	C	T
Y	17171340	1 to 2	C	A	C	A	A	A	C
Y	17172848	1 to PPA_Desmond	C	T	C	C	C	C	T
Y	17175083	1 to PPA_Desmond	C	T	C	C	C	C	T
Y	17177710	1 to PPA_Desmond	T	A	T	T	T	T	A
Y	17180004	1 to 2	G	T	G	T	T	T	G
Y	17185775	1 to PPA_Desmond	T	C	T	T	T	T	C
Y	17186161	1 to PPA_Desmond	T	C	T	T	T	T	C
Y	17186337	1 to 2	G	A	G	A	A	A	G
Y	17186983	1 to PPA_Desmond	T	G	G	G	G	G	T
Y	17188279	1 to 2	G	A	G	A	A	A	G
Y	17189642	2 to 3	C	A	C	C	A	A	C
Y	17190724	1 to PPA_Desmond	C	T	T	T	T	T	C
Y	17190943	1 to 2	T	C	C	T	T	T	C
Y	17195769	1 to 2	A	G	A	G	G	G	A
Y	17199285	1 to 2	G	A	A	G	G	G	A
Y	17205057	1 to PPA_Desmond	T	C	T	T	T	T	C
Y	17205982	1 to ancestral	T	C	T	T	C	C	C
Y	17210369	1 to PPA_Desmond	A	T	T	T	T	T	A
Y	17210401	1 to PPA_Desmond	G	A	G	G	G	G	A
Y	17223751	1 to PPA_Desmond	T	C	T	T	T	T	C
Y	17225436	1 to 2	T	A	T	A	A	A	T
Y	17231523	1 to PPA_Desmond	G	A	G	G	G	G	A
Y	17233043	1 to 2	A	G	A	G	G	G	A
Y	17233241	2 to PPA_Bono	T	G	T	G	T	T	T
Y	17233457	1 to 2	T	C	T	C	C	C	T
Y	17234268	1 to 2	C	T	C	T	T	T	C
Y	17234703	2 to PPA_Bono	T	G	T	G	T	T	T
Y	17234775	2 to PPA_Bono	T	G	T	G	T	T	T
Y	17235263	2 to 3	A	G	G	A	G	G	A
Y	17235945	1 to PPA_Desmond	T	C	T	T	T	T	C
Y	17239004	1 to PPA_Desmond	A	G	A	A	A	A	G
Y	17241448	1 to 2	C	T	C	T	T	T	C
Y	17241507	1 to PPA_Desmond	A	C	A	A	A	A	C
Y	17242938	1 to 2	A	C	A	C	C	C	A
Y	17252362	1 to 2	A	G	A	G	G	G	A
Y	17254497	1 to 2	C	T	C	T	T	T	C
Y	17255742	1 to PPA_Desmond	C	A	C	C	C	C	A
Y	17255788	1 to 2	A	G	A	G	G	G	A
Y	17256255	1 to 2	T	C	T	C	C	C	T
Y	17257099	1 to 2	C	A	C	A	A	A	C
Y	17263437	1 to PPA_Desmond	T	C	T	T	T	T	C
Y	17264019	1 to 2	A	G	G	A	A	A	G
Y	17270800	1 to PPA_Desmond	C	T	C	C	C	C	T
Y	17271252	1 to PPA_Desmond	A	C	A	A	A	A	C
Y	17271292	1 to 2	T	C	T	C	C	C	T
Y	17271835	1 to PPA_Desmond	T	A	T	T	T	T	A
Y	17273570	1 to 2	T	C	T	C	C	C	T
Y	17275136	1 to PPA_Desmond	G	A	G	G	G	G	A
Y	17277673	2 to PPA_Bono	G	C	G	C	G	G	G
Y	17277780	1 to PPA_Desmond	T	C	C	C	C	C	T
Y	17280145	1 to 2	T	C	C	T	T	T	C
Y	17280567	1 to PPA_Desmond	A	G	A	A	A	A	G
Y	17281508	1 to PPA_Desmond	C	T	T	T	T	T	C
Y	17281552	1 to 2	G	A	G	A	A	A	G
Y	17283098	1 to PPA_Desmond	A	C	A	A	A	A	C
Y	17283427	1 to 2	T	A	A	T	T	T	A
Y	17285142	1 to PPA_Desmond	T	G	G	G	G	G	T
Y	17285547	1 to 2	A	G	A	G	G	G	A
Y	17286344	1 to PPA_Desmond	C	T	C	C	C	C	T
Y	17286785	1 to PPA_Desmond	G	A	A	A	A	A	G
Y	17291294	1 to 2	C	T	C	T	T	T	C
Y	17291359	1 to PPA_Desmond	A	G	A	A	A	A	G
Y	17292358	1 to PPA_Desmond	A	G	A	A	A	A	G
Y	17297429	1 to PPA_Desmond	A	G	A	A	A	A	G
Y	17298021	1 to PPA_Desmond	T	C	T	T	T	T	C
Y	17299080	1 to 2	T	C	T	C	C	C	T
Y	17300013	1 to 2	T	C	T	C	C	C	T
Y	17308449	1 to PPA_Desmond	T	C	T	T	T	T	C
Y	17309460	1 to 2	T	C	T	C	C	C	T
Y	17312134	1 to 2	G	T	G	T	T	T	G
Y	17313427	1 to PPA_Desmond	A	G	G	G	G	G	A
Y	17315322	1 to 2	G	C	C	G	G	G	C
Y	17315667	1 to PPA_Desmond	C	G	C	C	C	C	G
Y	17317916	1 to 2	G	A	G	A	A	A	G
Y	17320031	2 to PPA_Bono	G	A	G	A	G	G	G
Y	17321270	1 to PPA_Desmond	G	A	G	G	G	G	A
Y	17322076	1 to PPA_Desmond	G	A	G	G	G	G	A
Y	17322172	1 to PPA_Desmond	G	C	G	G	G	G	C
Y	17324795	1 to PPA_Desmond	T	C	T	T	T	T	C
Y	17325903	1 to 2	A	G	A	G	G	G	A
Y	17326017	1 to PPA_Desmond	G	T	G	G	G	G	T
Y	17327979	1 to PPA_Desmond	C	T	C	C	C	C	T
Y	17329487	1 to 2	C	T	C	T	T	T	C
Y	17329561	2 to 3	C	T	C	C	T	T	C
Y	17329932	1 to 2	T	C	T	C	C	C	T
Y	17330297	2 to PPA_Bono	T	A	T	A	T	T	T
Y	17330991	2 to 3	G	A	G	G	A	A	G
Y	17331614	2 to 3	C	G	C	C	G	G	C
Y	17332652	1 to 2	G	A	G	A	A	A	G
Y	17335707	1 to 2	G	A	G	A	A	A	G
Y	17336587	1 to 2	C	A	A	C	C	C	A
Y	17337654	1 to PPA_Desmond	A	G	A	A	A	A	G
Y	17339158	1 to 2	C	T	T	C	C	C	T
Y	17339792	1 to 2	A	G	A	G	G	G	A
Y	17340204	1 to ancestral	T	C	T	C	T	T	C
Y	17340522	2 to PPA_Bono	C	T	C	T	C	C	C
Y	17341747	1 to 2	T	C	T	C	C	C	T
Y	17344901	1 to 2	G	C	G	C	C	C	G
Y	17345113	1 to PPA_Desmond	C	T	T	T	T	T	C
Y	17345745	1 to PPA_Desmond	A	C	A	A	A	A	C
Y	17351128	1 to PPA_Desmond	A	G	A	A	A	A	G
Y	17351784	2 to PPA_Bono	T	C	T	C	T	T	T
Y	17354464	2 to PPA_Bono	C	T	C	T	C	C	C
Y	17357965	1 to 2	G	C,T	T	C	C	C	T
Y	17358743	1 to PPA_Desmond	C	G	G	G	G	G	C
Y	17358911	2 to PPA_Bono	G	C	G	C	G	G	G
Y	17361195	1 to 2	G	T	G	T	T	T	G
Y	17361758	1 to PPA_Desmond	T	C	T	T	T	T	C
Y	17361788	1 to 2	A	G	A	G	G	G	A
Y	17362048	1 to PPA_Desmond	G	A	G	G	G	G	A
Y	17363110	1 to PPA_Desmond	A	T	A	A	A	A	T
Y	17365249	1 to 2	C	T,A	A	T	T	T	A
Y	17365909	1 to PPA_Desmond	A	G	A	A	A	A	G
Y	17383438	1 to PPA_Desmond	A	T	A	A	A	A	T
Y	17384215	1 to 2	T	C	T	C	C	C	T
Y	17384675	1 to PPA_Desmond	G	A	G	G	G	G	A
Y	17384994	1 to PPA_Desmond	C	A	C	C	C	C	A
Y	17385181	1 to 2	G	C	G	C	C	C	G
Y	17385681	1 to PPA_Desmond	G	T	G	G	G	G	T
Y	17386633	1 to PPA_Desmond	G	A	G	G	G	G	A
Y	17393727	1 to 2	G	A	G	A	A	A	G
Y	17393822	1 to PPA_Desmond	A	G	A	A	A	A	G
Y	17394413	1 to PPA_Desmond	C	A	A	A	A	A	C
Y	17394516	2 to 3	G	C	G	G	C	C	G
Y	17394572	1 to 2	C	T	T	C	C	C	T
Y	17395622	1 to PPA_Desmond	T	C	T	T	T	T	C
Y	17399890	1 to PPA_Desmond	C	A	C	C	C	C	A
Y	17400089	1 to 2	T	G	T	G	G	G	T
Y	17400129	1 to PPA_Desmond	G	C	G	G	G	G	C
Y	17403691	1 to 2	C	T	C	T	T	T	C
Y	17406473	1 to 2	G	A	A	G	G	G	A
Y	17406691	1 to 2	G	C	G	C	C	C	G
Y	17409923	1 to 2	T	C	T	C	C	C	T
Y	17410071	1 to 2	T	A	T	A	A	A	T
Y	17411023	2 to 3	G	A	G	G	A	A	G
Y	17411059	2 to PPA_Bono	G	C	G	C	G	G	G
Y	17411370	1 to 2	G	A	G	A	A	A	G
Y	17415678	2 to 3	A	T	A	A	T	T	A
Y	17416205	1 to 2	C	A	C	A	A	A	C
Y	17416353	1 to 2	A	G	A	G	G	G	A
Y	17416553	1 to PPA_Desmond	A	G	A	A	A	A	G
Y	17416994	1 to PPA_Desmond	A	C	A	A	A	A	C
Y	17419120	1 to 2	T	G	T	G	G	G	T
Y	17419511	1 to PPA_Desmond	A	G	G	G	G	G	A
Y	17419592	1 to 2	T	G	T	G	G	G	T
Y	17421741	1 to PPA_Desmond	C	A	C	C	C	C	A
Y	17421815	1 to 2	A	G	A	G	G	G	A
Y	17421950	1 to PPA_Desmond	A	C	A	A	A	A	C
Y	17422959	1 to PPA_Desmond	A	C	A	A	A	A	C
Y	17423459	1 to 2	T	C	T	C	C	C	T
Y	17425842	1 to 2	A	C	A	C	C	C	A
Y	17434538	1 to 2	C	A	C	A	A	A	C
Y	17434611	1 to 2	A	G	A	G	G	G	A
Y	17435800	1 to 2	G	A	G	A	A	A	G
Y	17435985	1 to 2	C	A	C	A	A	A	C
Y	17436105	2 to PPA_Bono	C	T	C	T	C	C	C
Y	17436601	1 to PPA_Desmond	G	A	G	G	G	G	A
Y	17440483	1 to PPA_Desmond	T	C	T	T	T	T	C
Y	17442460	1 to PPA_Desmond	C	A	C	C	C	C	A
Y	17442994	1 to PPA_Desmond	T	C	T	T	T	T	C
Y	17443607	1 to 2	G	A	G	A	A	A	G
Y	17444305	1 to PPA_Desmond	C	A	C	C	C	C	A
Y	17444333	1 to PPA_Desmond	G	A	G	G	G	G	A
Y	17444761	1 to PPA_Desmond	G	A	G	G	G	G	A
Y	17444856	1 to PPA_Desmond	G	A	A	A	A	A	G
Y	17444952	1 to PPA_Desmond	G	A	G	G	G	G	A
Y	17445414	1 to 2	G	T	G	T	T	T	G
Y	17446252	1 to PPA_Desmond	C	G	C	C	C	C	G
Y	17448485	1 to PPA_Desmond	T	C	T	T	T	T	C
Y	17457445	1 to 2	C	A	C	A	A	A	C
Y	17457755	1 to 2	G	A	G	A	A	A	G
Y	17457851	1 to 2	T	C	T	C	C	C	T
Y	17459432	1 to PPA_Desmond	G	A	G	G	G	G	A
Y	17460080	1 to 2	A	G	A	G	G	G	A
Y	17467333	1 to PPA_Desmond	G	A	A	A	A	A	G
Y	17468855	1 to 2	G	T	G	T	T	T	G
Y	17469800	1 to PPA_Desmond	T	C	T	T	T	T	C
Y	17470805	1 to PPA_Desmond	G	A	G	G	G	G	A
Y	17471118	1 to 2	C	A	C	A	A	A	C
Y	17473271	1 to 2	G	A	G	A	A	A	G
Y	17474270	2 to PPA_Bono	G	A	G	A	G	G	G
Y	17476216	1 to 2	T	G,A	A	G	G	G	A
Y	17476588	1 to 2	A	G	A	G	G	G	A
Y	17477701	1 to 2	G	A	G	A	A	A	G
Y	17477883	1 to 2	A	C	A	C	C	C	A
Y	17479163	1 to PPA_Desmond	G	A	G	G	G	G	A
Y	17480629	1 to PPA_Desmond	C	T	C	C	C	C	T
Y	17488148	1 to PPA_Desmond	A	G	A	A	A	A	G
Y	17488335	2 to PPA_Bono	G	A	G	A	G	G	G
Y	17489420	1 to PPA_Desmond	C	A	A	A	A	A	C
Y	17494894	1 to 2	T	C	T	C	C	C	T
Y	17495465	2 to 3	T	C	C	T	C	C	T
Y	17495942	1 to 2	T	C	T	C	C	C	T
Y	17496906	1 to PPA_Desmond	G	A	G	G	G	G	A
Y	17497353	1 to PPA_Desmond	A	G	A	A	A	A	G
Y	17497645	1 to PPA_Desmond	G	A	A	A	A	A	G
Y	17506888	2 to PPA_Bono	G	A	G	A	G	G	G
Y	17507415	1 to PPA_Desmond	G	T	G	G	G	G	T
Y	17507703	2 to PPA_Bono	G	A	G	A	G	G	G
Y	17509073	2 to PPA_Bono	C	A	C	A	C	C	C
Y	17509340	1 to PPA_Desmond	C	T	T	T	T	T	C
Y	17510103	1 to PPA_Desmond	T	C	T	T	T	T	C
Y	17517577	1 to PPA_Desmond	C	A	C	C	C	C	A
Y	17517962	1 to 2	G	A	G	A	A	A	G
Y	17526508	1 to PPA_Desmond	G	A	G	G	G	G	A
Y	17530770	1 to 2	T	A	T	A	A	A	T
Y	17533431	1 to PPA_Desmond	G	A	G	G	G	G	A
Y	17533521	1 to PPA_Desmond	G	A	A	A	A	A	G
Y	17549843	1 to PPA_Desmond	G	C	G	G	G	G	C
Y	17549957	1 to 2	T	C	T	C	C	C	T
Y	17551318	1 to 2	A	G	A	G	G	G	A
Y	17552807	1 to PPA_Desmond	T	C	T	T	T	T	C
Y	17554100	1 to PPA_Desmond	G	C	G	G	G	G	C
Y	17556213	1 to PPA_Desmond	T	C	T	T	T	T	C
Y	17557799	1 to PPA_Desmond	T	C	T	T	T	T	C
Y	17559314	2 to PPA_Bono	C	T	C	T	C	C	C
Y	17564983	1 to 2	C	T	C	T	T	T	C
[truncated: 1,286 more rows]

## Sheet: TableS10
Supplemental Table S10: MSY variant sites and genotypes in chimpanzees according to human genome reference (GRCh37/hg19)
CHROM	POS	Branch	REF	ALT	Ancestral	PTT/PTV_Tommy	PTV_7	PTT_Moritz	PTS_Bobby	PTE/PTV_EB176JC	PTV_Buttons	PTV_NA03450	PTV_8	PTE_Akwaya_Jean	PTE_Basho	PTE_Damian	PTE_Koto	PTS_Vincent	PTS_Bwambale	PTT_Vaillant	PTV_Bosco	PTV_Koby	PTV_Clint	PTV_Donald
Y	2652341	1 to 17	G	A	G	A	G	A	G	G	G	G	G	G	G	G	G	G	G	G	G	G	G	G
Y	2653822	1 to 2	A	T	A	A	T	A	T	T	T	T	T	T	T	T	T	T	T	T	T	T	T	T
Y	2653941	1 to 2	A	G	A	A	G	A	G	G	G	G	G	G	G	G	G	G	G	G	G	G	G	G
Y	2654630	1 to 17	G	C	G	C	G	C	G	G	G	G	G	G	G	G	G	G	G	G	G	G	G	G
Y	2655163	2 to PTT_Vaillant	T	G	T	T	T	T	T	T	T	T	T	T	T	T	T	T	T	G	T	T	T	T
Y	2655207	12 to 13	G	C	G	G	G	G	G	G	G	G	G	C	G	C	C	G	G	G	G	G	G	G
Y	2655441	15 to 16	G	A	G	G	G	G	A	G	G	G	G	G	G	G	G	G	A	G	G	G	G	G
Y	2655813	1 to 17	C	T	C	T	C	T	C	C	C	C	C	C	C	C	C	C	C	C	C	C	C	C
Y	2656421	1 to 17	G	C	G	C	G	C	G	G	G	G	G	G	G	G	G	G	G	G	G	G	G	G
Y	2656423	2 to PTT_Vaillant	A	C	A	A	A	A	A	A	A	A	A	A	A	A	A	A	A	C	A	A	A	A
Y	2656695	1 to 2	G	A	G	G	A	G	A	A	A	A	A	A	A	A	A	A	A	A	A	A	A	A
Y	2656913	1 to ancestral; 1 to 2; 17 to PTT_Moritz; 17 to PTT/PTV_Tommy	T	C	T	T	C	C	C	C	C	C	C	C	C	C	C	C	C	C	C	C	C	C
Y	2657084	1 to 17	C	T	C	T	C	T	C	C	C	C	C	C	C	C	C	C	C	C	C	C	C	C
Y	2657145	12 to 13	G	A	G	G	G	G	G	G	G	G	G	A	G	A	A	G	G	G	G	G	G	G
Y	2657339	3 to 15	C	A	C	C	C	C	A	C	C	C	C	C	C	C	C	A	A	C	C	C	C	C
Y	2657347	1 to 17	G	A	G	A	G	A	G	G	G	G	G	G	G	G	G	G	G	G	G	G	G	G
Y	2657370	1 to 2	C	G	C	C	G	C	G	G	G	G	G	G	G	G	G	G	G	G	G	G	G	G
Y	2657729	1 to 17	A	G	A	G	A	G	A	A	A	A	A	A	A	A	A	A	A	A	A	A	A	A
Y	2657743	2 to PTT_Vaillant	C	T	C	C	C	C	C	C	C	C	C	C	C	C	C	C	C	T	C	C	C	C
Y	2658538	3 to 15	T	G	T	T	T	T	G	T	T	T	T	T	T	T	T	G	G	T	T	T	T	T
Y	2658930	1 to 2	G	C	G	G	C	G	C	C	C	C	C	C	C	C	C	C	C	C	C	C	C	C
Y	2659116	1 to 2	C	T	C	C	T	C	T	T	T	T	T	T	T	T	T	T	T	T	T	T	T	T
Y	2659560	4 to 5	A	G	A	A	G	A	A	G	G	G	G	A	A	A	A	A	A	A	G	G	G	G
Y	2659586	1 to 17	T	G	T	G	T	G	T	T	T	T	T	T	T	T	T	T	T	T	T	T	T	T
Y	2660064	4 to 5	C	G	C	C	G	C	C	G	G	G	G	C	C	C	C	C	C	C	G	G	G	G
Y	2660311	2 to PTT_Vaillant	G	C	G	G	G	G	G	G	G	G	G	G	G	G	G	G	G	C	G	G	G	G
Y	2661222	1 to 2	T	C	T	T	C	T	C	C	C	C	C	C	C	C	C	C	C	C	C	C	C	C
Y	2661327	4 to 12	C	A	C	C	C	C	C	C	C	C	C	A	A	A	A	C	C	C	C	C	C	C
Y	2661718	12 to PTE_Basho	A	G	A	A	A	A	A	A	A	A	A	A	G	A	A	A	A	A	A	A	A	A
Y	2664045	3 to 15	G	A	G	G	G	G	A	G	G	G	G	G	G	G	G	A	A	G	G	G	G	G
Y	2664053	12 to 13	A	G	A	A	A	A	A	A	A	A	A	G	A	G	G	A	A	A	A	A	A	A
Y	2664125	16 to PTS_Bwambale	G	A	G	G	G	G	G	G	G	G	G	G	G	G	G	G	A	G	G	G	G	G
Y	2664136	1 to 2	C	T	C	C	T	C	T	T	T	T	T	T	T	T	T	T	T	T	T	T	T	T
Y	2664261	2 to PTT_Vaillant	G	A	G	G	G	G	G	G	G	G	G	G	G	G	G	G	G	A	G	G	G	G
Y	2664431	4 to 12	G	A	G	G	G	G	G	G	G	G	G	A	A	A	A	G	G	G	G	G	G	G
Y	2664989	2 to PTT_Vaillant	A	T	A	A	A	A	A	A	A	A	A	A	A	A	A	A	A	T	A	A	A	A
Y	2664998	2 to PTT_Vaillant	G	A	G	G	G	G	G	G	G	G	G	G	G	G	G	G	G	A	G	G	G	G
Y	2667574	1 to 17	G	A	A	G	A	G	A	A	A	A	A	A	A	A	A	A	A	A	A	A	A	A
Y	2667822	12 to 13	A	G	A	A	A	A	A	A	A	A	A	G	A	G	G	A	A	A	A	A	A	A
Y	2667905	4 to 5	G	C	G	G	C	G	G	C	C	C	C	G	G	G	G	G	G	G	C	C	C	C
Y	2667908	2 to PTT_Vaillant	T	C	T	T	T	T	T	T	T	T	T	T	T	T	T	T	T	C	T	T	T	T
Y	2686381	2 to PTT_Vaillant	C	T	C	C	C	C	C	C	C	C	C	C	C	C	C	C	C	T	C	C	C	C
Y	2686554	2 to PTT_Vaillant	C	T	C	C	C	C	C	C	C	C	C	C	C	C	C	C	C	T	C	C	C	C
Y	2686794	1 to 17	G	A	G	A	G	A	G	G	G	G	G	G	G	G	G	G	G	G	G	G	G	G
Y	2687670	1 to 2	T	A	T	T	A	T	A	A	A	A	A	A	A	A	A	A	A	A	A	A	A	A
Y	2691854	1 to 2	G	A	G	G	A	G	A	A	A	A	A	A	A	A	A	A	A	A	A	A	A	A
Y	2691897	15 to PTS_Vincent	G	A	G	G	G	G	G	G	G	G	G	G	G	G	G	A	G	G	G	G	G	G
Y	2692116	13 to PTE_Damian	A	G	A	A	A	A	A	A	A	A	A	A	A	G	A	A	A	A	A	A	A	A
Y	2692148	3 to 15	C	T	C	C	C	C	T	C	C	C	C	C	C	C	C	T	T	C	C	C	C	C
Y	2692711	4 to 12	A	T	A	A	A	A	A	A	A	A	A	T	T	T	T	A	A	A	A	A	A	A
Y	2693399	3 to 15	G	A	G	G	G	G	A	G	G	G	G	G	G	G	G	A	A	G	G	G	G	G
Y	2694259	1 to 17	G	C	G	C	G	C	G	G	G	G	G	G	G	G	G	G	G	G	G	G	G	G
Y	2694533	4 to 12	T	C	T	T	T	T	T	T	T	T	T	C	C	C	C	T	T	T	T	T	T	T
Y	2694707	4 to 12	G	A	G	G	G	G	G	G	G	G	G	A	A	A	A	G	G	G	G	G	G	G
Y	2696239	1 to 17	C	T	C	T	C	T	C	C	C	C	C	C	C	C	C	C	C	C	C	C	C	C
Y	2696296	1 to 2	G	T	G	G	T	G	T	T	T	T	T	T	T	T	T	T	T	T	T	T	T	T
Y	2696417	1 to 2	G	A	G	G	A	G	A	A	A	A	A	A	A	A	A	A	A	A	A	A	A	A
Y	2696463	1 to 2	C	T	C	C	T	C	T	T	T	T	T	T	T	T	T	T	T	T	T	T	T	T
Y	2706011	1 to 2	A	C	A	A	C	A	C	C	C	C	C	C	C	C	C	C	C	C	C	C	C	C
Y	2706204	1 to 17	C	A	C	A	C	A	C	C	C	C	C	C	C	C	C	C	C	C	C	C	C	C
Y	2709544	9 to PTV_Clint	T	C	T	T	T	T	T	T	T	T	T	T	T	T	T	T	T	T	T	T	C	T
Y	2709910	1 to 17	C	T	C	T	C	T	C	C	C	C	C	C	C	C	C	C	C	C	C	C	C	C
Y	2709911	12 to 13	C	T	C	C	C	C	C	C	C	C	C	T	C	T	T	C	C	C	C	C	C	C
Y	2710058	1 to 2	A	G	A	A	G	A	G	G	G	G	G	G	G	G	G	G	G	G	G	G	G	G
Y	2710625	4 to 5	C	T	C	C	T	C	C	T	T	T	T	C	C	C	C	C	C	C	T	T	T	T
Y	2710738	1 to 17	G	T	G	T	G	T	G	G	G	G	G	G	G	G	G	G	G	G	G	G	G	G
Y	2710792	1 to 17	G	A	G	A	G	A	G	G	G	G	G	G	G	G	G	G	G	G	G	G	G	G
Y	2710952	1 to 17	C	A	C	A	C	A	C	C	C	C	C	C	C	C	C	C	C	C	C	C	C	C
Y	2710953	1 to 2	G	C	G	G	C	G	C	C	C	C	C	C	C	C	C	C	C	C	C	C	C	C
Y	2711420	1 to 17	G	C	G	C	G	C	G	G	G	G	G	G	G	G	G	G	G	G	G	G	G	G
Y	2711755	14 to PTE_Koto	G	A	G	G	G	G	G	G	G	G	G	G	G	G	A	G	G	G	G	G	G	G
Y	2711950	1 to 17	A	G	A	G	A	G	A	A	A	A	A	A	A	A	A	A	A	A	A	A	A	A
Y	2712141	1 to 2	C	T	C	C	T	C	T	T	T	T	T	T	T	T	T	T	T	T	T	T	T	T
Y	2712462	2 to PTT_Vaillant	G	A,T	A	A	A	A	A	A	A	A	A	A	A	A	A	A	A	T	A	A	A	A
Y	2712516	16 to PTS_Bwambale	G	A	G	G	G	G	G	G	G	G	G	G	G	G	G	G	A	G	G	G	G	G
Y	2712667	3 to 15	T	C	T	T	T	T	C	T	T	T	T	T	T	T	T	C	C	T	T	T	T	T
Y	2713411	1 to 17	C	T	C	T	C	T	C	C	C	C	C	C	C	C	C	C	C	C	C	C	C	C
Y	2713426	2 to PTT_Vaillant	C	T	C	C	C	C	C	C	C	C	C	C	C	C	C	C	C	T	C	C	C	C
Y	2713504	1 to 17	G	A	G	A	G	A	G	G	G	G	G	G	G	G	G	G	G	G	G	G	G	G
Y	2714627	1 to 17	C	T	T	C	T	C	T	T	T	T	T	T	T	T	T	T	T	T	T	T	T	T
Y	2714971	3 to 4	T	G	T	T	G	T	T	G	G	G	G	G	G	G	G	T	T	T	G	G	G	G
Y	2715206	3 to 15	C	A	C	C	C	C	A	C	C	C	C	C	C	C	C	A	A	C	C	C	C	C
Y	2715214	2 to PTT_Vaillant	G	C	G	G	G	G	G	G	G	G	G	G	G	G	G	G	G	C	G	G	G	G
Y	2715576	12 to PTE_Basho	G	A	G	G	G	G	G	G	G	G	G	G	A	G	G	G	G	G	G	G	G	G
Y	2715763	3 to 15	A	G	A	A	A	A	G	A	A	A	A	A	A	A	A	G	G	A	A	A	A	A
Y	2715800	4 to 12	G	T	G	G	G	G	G	G	G	G	G	T	T	T	T	G	G	G	G	G	G	G
Y	2715963	3 to 4	A	G	A	A	G	A	A	G	G	G	G	G	G	G	G	A	A	A	G	G	G	G
Y	2716214	3 to 15	C	T	C	C	C	C	T	C	C	C	C	C	C	C	C	T	T	C	C	C	C	C
Y	2716235	4 to 5	G	A	G	G	A	G	G	A	A	A	A	G	G	G	G	G	G	G	A	A	A	A
Y	2716960	4 to 12	C	T	C	C	C	C	C	C	C	C	C	T	T	T	T	C	C	C	C	C	C	C
Y	2717035	1 to 17	C	T	C	T	C	T	C	C	C	C	C	C	C	C	C	C	C	C	C	C	C	C
Y	2717290	12 to 13	A	G	A	A	A	A	A	A	A	A	A	G	A	G	G	A	A	A	A	A	A	A
Y	2717828	2 to PTT_Vaillant	G	A	G	G	G	G	G	G	G	G	G	G	G	G	G	G	G	A	G	G	G	G
Y	2717889	1 to 17	G	A	A	G	A	G	A	A	A	A	A	A	A	A	A	A	A	A	A	A	A	A
Y	2718250	1 to 2	C	T	C	C	T	C	T	T	T	T	T	T	T	T	T	T	T	T	T	T	T	T
Y	2718681	1 to 17	A	G	A	G	A	G	A	A	A	A	A	A	A	A	A	A	A	A	A	A	A	A
Y	2719305	4 to 12	T	C	T	T	T	T	T	T	T	T	T	C	C	C	C	T	T	T	T	T	T	T
Y	2719589	1 to 17	T	C	T	C	T	C	T	T	T	T	T	T	T	T	T	T	T	T	T	T	T	T
Y	2719656	1 to 17	T	C	T	C	T	C	T	T	T	T	T	T	T	T	T	T	T	T	T	T	T	T
Y	2719727	1 to 2	G	A	G	G	A	G	A	A	A	A	A	A	A	A	A	A	A	A	A	A	A	A
Y	2719753	1 to 2	C	T	C	C	T	C	T	T	T	T	T	T	T	T	T	T	T	T	T	T	T	T
Y	2719813	2 to PTT_Vaillant	G	A	G	G	G	G	G	G	G	G	G	G	G	G	G	G	G	A	G	G	G	G
Y	2720967	3 to 15	T	C	T	T	T	T	C	T	T	T	T	T	T	T	T	C	C	T	T	T	T	T
Y	2721043	1 to 17	C	T	C	T	C	T	C	C	C	C	C	C	C	C	C	C	C	C	C	C	C	C
Y	2721273	1 to 17	A	G	A	G	A	G	A	A	A	A	A	A	A	A	A	A	A	A	A	A	A	A
Y	2721286	1 to 17	G	A	G	A	G	A	G	G	G	G	G	G	G	G	G	G	G	G	G	G	G	G
Y	2721847	1 to 2	T	C	T	T	C	T	C	C	C	C	C	C	C	C	C	C	C	C	C	C	C	C
Y	2722084	1 to 2	C	G	C	C	G	C	G	G	G	G	G	G	G	G	G	G	G	G	G	G	G	G
Y	2722239	1 to 17	C	A	C	A	C	A	C	C	C	C	C	C	C	C	C	C	C	C	C	C	C	C
Y	2722556	1 to 17	C	A	C	A	C	A	C	C	C	C	C	C	C	C	C	C	C	C	C	C	C	C
Y	2722892	3 to 15	T	C	T	T	T	T	C	T	T	T	T	T	T	T	T	C	C	T	T	T	T	T
Y	2723166	2 to PTT_Vaillant	G	A	G	G	G	G	G	G	G	G	G	G	G	G	G	G	G	A	G	G	G	G
Y	2723732	1 to 2	T	C	C	C	T	C	T	T	T	T	T	T	T	T	T	T	T	T	T	T	T	T
Y	2723798	1 to 2	G	A	G	G	A	G	A	A	A	A	A	A	A	A	A	A	A	A	A	A	A	A
Y	2724261	2 to PTT_Vaillant	G	C	G	G	G	G	G	G	G	G	G	G	G	G	G	G	G	C	G	G	G	G
Y	2724433	12 to 13	G	A	G	G	G	G	G	G	G	G	G	A	G	A	A	G	G	G	G	G	G	G
Y	2724437	4 to 5	C	T	C	C	T	C	C	T	T	T	T	C	C	C	C	C	C	C	T	T	T	T
Y	2724511	3 to 15	A	C	A	A	A	A	C	A	A	A	A	A	A	A	A	C	C	A	A	A	A	A
Y	2725084	15 to PTS_Vincent	G	A	G	G	G	G	G	G	G	G	G	G	G	G	G	A	G	G	G	G	G	G
Y	2725203	1 to 17	A	G	A	G	A	G	A	A	A	A	A	A	A	A	A	A	A	A	A	A	A	A
Y	2727465	1 to 17	C	A	C	A	C	A	C	C	C	C	C	C	C	C	C	C	C	C	C	C	C	C
Y	2727621	2 to PTT_Vaillant	C	G	C	C	C	C	C	C	C	C	C	C	C	C	C	C	C	G	C	C	C	C
Y	2727831	1 to 17	A	T	A	T	A	T	A	A	A	A	A	A	A	A	A	A	A	A	A	A	A	A
Y	2729378	1 to 17	C	T	C	T	C	T	C	C	C	C	C	C	C	C	C	C	C	C	C	C	C	C
Y	2729599	4 to 5	G	T	G	G	T	G	G	T	T	T	T	G	G	G	G	G	G	G	T	T	T	T
Y	2729742	1 to 17	T	C	C	T	C	T	C	C	C	C	C	C	C	C	C	C	C	C	C	C	C	C
Y	2729912	15 to 16	C	T	C	C	C	C	T	C	C	C	C	C	C	C	C	C	T	C	C	C	C	C
Y	2730404	4 to 12	C	G	C	C	C	C	C	C	C	C	C	G	G	G	G	C	C	C	C	C	C	C
Y	2730581	3 to 15	A	G	A	A	A	A	G	A	A	A	A	A	A	A	A	G	G	A	A	A	A	A
Y	2730631	4 to 12	C	G	C	C	C	C	C	C	C	C	C	G	G	G	G	C	C	C	C	C	C	C
Y	2730870	4 to 5	C	T	C	C	T	C	C	T	T	T	T	C	C	C	C	C	C	C	T	T	T	T
Y	2731189	2 to PTT_Vaillant	C	T	C	C	C	C	C	C	C	C	C	C	C	C	C	C	C	T	C	C	C	C
Y	2731257	1 to 17	G	A	G	A	G	A	G	G	G	G	G	G	G	G	G	G	G	G	G	G	G	G
Y	2731409	4 to 5	T	C	T	T	C	T	T	C	C	C	C	T	T	T	T	T	T	T	C	C	C	C
Y	2731421	6 to PTV_Bosco	G	C	G	G	G	G	G	G	G	G	G	G	G	G	G	G	G	G	C	G	G	G
Y	2731846	2 to PTT_Vaillant	T	C	T	T	T	T	T	T	T	T	T	T	T	T	T	T	T	C	T	T	T	T
Y	2731960	3 to 15	A	T	A	A	A	A	T	A	A	A	A	A	A	A	A	T	T	A	A	A	A	A
Y	2732163	3 to 15	G	C	G	G	G	G	C	G	G	G	G	G	G	G	G	C	C	G	G	G	G	G
Y	2732178	1 to 17	C	G	C	G	C	G	C	C	C	C	C	C	C	C	C	C	C	C	C	C	C	C
Y	2732218	4 to 5	G	C	G	G	C	G	G	C	C	C	C	G	G	G	G	G	G	G	C	C	C	C
Y	2732357	3 to 15	G	C	G	G	G	G	C	G	G	G	G	G	G	G	G	C	C	G	G	G	G	G
Y	2732446	2 to PTT_Vaillant	T	C	T	T	T	T	T	T	T	T	T	T	T	T	T	T	T	C	T	T	T	T
Y	2732735	4 to 12	G	T	G	G	G	G	G	G	G	G	G	T	T	T	T	G	G	G	G	G	G	G
Y	2732760	1 to 2	C	T	C	C	T	C	T	T	T	T	T	T	T	T	T	T	T	T	T	T	T	T
Y	2733414	10 to PTV_Koby	G	A	G	G	G	G	G	G	G	G	G	G	G	G	G	G	G	G	G	A	G	G
Y	2733454	1 to 2	C	A	C	C	A	C	A	A	A	A	A	A	A	A	A	A	A	A	A	A	A	A
Y	2733920	3 to 4	T	G	T	T	G	T	T	G	G	G	G	G	G	G	G	T	T	T	G	G	G	G
Y	2733998	1 to 17	C	T	C	T	C	T	C	C	C	C	C	C	C	C	C	C	C	C	C	C	C	C
Y	2734115	1 to 17	G	A	G	A	G	A	G	G	G	G	G	G	G	G	G	G	G	G	G	G	G	G
Y	2734621	4 to 5	C	G	C	C	G	C	C	G	G	G	G	C	C	C	C	C	C	C	G	G	G	G
Y	2734630	1 to 2	G	A	G	G	A	G	A	A	A	A	A	A	A	A	A	A	A	A	A	A	A	A
Y	2734966	1 to 2	G	A	G	G	A	G	A	A	A	A	A	A	A	A	A	A	A	A	A	A	A	A
Y	2735197	1 to 17	C	T	C	T	C	T	C	C	C	C	C	C	C	C	C	C	C	C	C	C	C	C
Y	2735218	1 to 17	C	T	C	T	C	T	C	C	C	C	C	C	C	C	C	C	C	C	C	C	C	C
Y	2737116	1 to 17	C	A	C	A	C	A	C	C	C	C	C	C	C	C	C	C	C	C	C	C	C	C
Y	2737345	1 to 17	A	C	A	C	A	C	A	A	A	A	A	A	A	A	A	A	A	A	A	A	A	A
Y	2737977	3 to 15	T	G	T	T	T	T	G	T	T	T	T	T	T	T	T	G	G	T	T	T	T	T
Y	2738123	12 to PTE_Basho	T	G	T	T	T	T	T	T	T	T	T	T	G	T	T	T	T	T	T	T	T	T
Y	2738526	2 to PTT_Vaillant	T	C	T	T	T	T	T	T	T	T	T	T	T	T	T	T	T	C	T	T	T	T
Y	2738545	4 to 12	C	T	C	C	C	C	C	C	C	C	C	T	T	T	T	C	C	C	C	C	C	C
Y	2739165	1 to 2	C	T	C	C	T	C	T	T	T	T	T	T	T	T	T	T	T	T	T	T	T	T
Y	2742474	1 to 17	C	G	C	G	C	G	C	C	C	C	C	C	C	C	C	C	C	C	C	C	C	C
Y	2742757	1 to 17	C	G	C	G	C	G	C	C	C	C	C	C	C	C	C	C	C	C	C	C	C	C
Y	2742766	1 to 17	C	T	C	T	C	T	C	C	C	C	C	C	C	C	C	C	C	C	C	C	C	C
Y	2742785	1 to 17	T	G	T	G	T	G	T	T	T	T	T	T	T	T	T	T	T	T	T	T	T	T
Y	2746006	12 to 13	A	G	A	A	A	A	A	A	A	A	A	G	A	G	G	A	A	A	A	A	A	A
Y	2746251	1 to 2	A	T	A	A	T	A	T	T	T	T	T	T	T	T	T	T	T	T	T	T	T	T
Y	2747178	2 to PTT_Vaillant	T	G	T	T	T	T	T	T	T	T	T	T	T	T	T	T	T	G	T	T	T	T
Y	2747494	1 to 2	C	T	C	C	T	C	T	T	T	T	T	T	T	T	T	T	T	T	T	T	T	T
Y	2748179	3 to 4	T	G	T	T	G	T	T	G	G	G	G	G	G	G	G	T	T	T	G	G	G	G
Y	2748744	4 to 5	T	C	C	C	T	C	C	T	T	T	T	C	C	C	C	C	C	C	T	T	T	T
Y	2748872	4 to 5	G	T	G	G	T	G	G	T	T	T	T	G	G	G	G	G	G	G	T	T	T	T
Y	2749172	1 to 2	A	T	A	A	T	A	T	T	T	T	T	T	T	T	T	T	T	T	T	T	T	T
Y	2749380	1 to 2	A	G	A	A	G	A	G	G	G	G	G	G	G	G	G	G	G	G	G	G	G	G
Y	2750072	12 to 13	A	G	A	A	A	A	A	A	A	A	A	G	A	G	G	A	A	A	A	A	A	A
Y	2750314	4 to 5	T	C	T	T	C	T	T	C	C	C	C	T	T	T	T	T	T	T	C	C	C	C
Y	2750472	1 to 2	C	T	C	C	T	C	T	T	T	T	T	T	T	T	T	T	T	T	T	T	T	T
Y	2751526	1 to 17	C	T	C	T	C	T	C	C	C	C	C	C	C	C	C	C	C	C	C	C	C	C
Y	2751797	2 to 3	C	T	C	C	T	C	T	T	T	T	T	T	T	T	T	T	T	C	T	T	T	T
Y	2751949	1 to 2	G	A	A	A	G	A	G	G	G	G	G	G	G	G	G	G	G	G	G	G	G	G
Y	2757246	1 to 17	C	G	C	G	C	G	C	C	C	C	C	C	C	C	C	C	C	C	C	C	C	C
Y	2757631	1 to 17	T	C	T	C	T	C	T	T	T	T	T	T	T	T	T	T	T	T	T	T	T	T
Y	2757731	1 to 2	C	G	C	C	G	C	G	G	G	G	G	G	G	G	G	G	G	G	G	G	G	G
Y	2758022	1 to 17	G	A	G	A	G	A	G	G	G	G	G	G	G	G	G	G	G	G	G	G	G	G
Y	2758029	3 to 15	C	T	C	C	C	C	T	C	C	C	C	C	C	C	C	T	T	C	C	C	C	C
Y	2759292	15 to PTS_Vincent	G	A	G	G	G	G	G	G	G	G	G	G	G	G	G	A	G	G	G	G	G	G
Y	2759296	4 to 12	G	T	G	G	G	G	G	G	G	G	G	T	T	T	T	G	G	G	G	G	G	G
Y	2759335	2 to PTT_Vaillant	T	A	T	T	T	T	T	T	T	T	T	T	T	T	T	T	T	A	T	T	T	T
Y	2764249	4 to 5	A	C	A	A	C	A	A	C	C	C	C	A	A	A	A	A	A	A	C	C	C	C
Y	2764307	2 to PTT_Vaillant	C	T	C	C	C	C	C	C	C	C	C	C	C	C	C	C	C	T	C	C	C	C
Y	2764342	1 to 17	C	T	C	T	C	T	C	C	C	C	C	C	C	C	C	C	C	C	C	C	C	C
Y	2764345	16 to PTS_Bobby	G	T	G	G	G	G	T	G	G	G	G	G	G	G	G	G	G	G	G	G	G	G
Y	2764473	12 to 13	C	T	C	C	C	C	C	C	C	C	C	T	C	T	T	C	C	C	C	C	C	C
Y	2764540	4 to 12	G	T	G	G	G	G	G	G	G	G	G	T	T	T	T	G	G	G	G	G	G	G
Y	2764570	5 to 10	G	C	G	G	G	G	G	G	C	G	C	G	G	G	G	G	G	G	G	C	G	G
Y	2764739	1 to 17	A	C	A	C	A	C	A	A	A	A	A	A	A	A	A	A	A	A	A	A	A	A
Y	2764864	3 to 15	T	A	T	T	T	T	A	T	T	T	T	T	T	T	T	A	A	T	T	T	T	T
Y	2765024	1 to 2	C	G	C	C	G	C	G	G	G	G	G	G	G	G	G	G	G	G	G	G	G	G
Y	2765342	1 to 2	C	T	C	C	T	C	T	T	T	T	T	T	T	T	T	T	T	T	T	T	T	T
Y	2765610	1 to 2	C	G	C	C	G	C	G	G	G	G	G	G	G	G	G	G	G	G	G	G	G	G
Y	2766368	4 to 5	A	C	A	A	C	A	A	C	C	C	C	A	A	A	A	A	A	A	C	C	C	C
Y	2766584	2 to 3	A	G	A	A	G	A	G	G	G	G	G	G	G	G	G	G	G	A	G	G	G	G
Y	2766900	3 to 15	G	A	G	G	G	G	A	G	G	G	G	G	G	G	G	A	A	G	G	G	G	G
Y	2766975	3 to 15	C	T	C	C	C	C	T	C	C	C	C	C	C	C	C	T	T	C	C	C	C	C
Y	2766998	12 to 13	T	A	T	T	T	T	T	T	T	T	T	A	T	A	A	T	T	T	T	T	T	T
Y	2766999	2 to PTT_Vaillant	A	T	A	A	A	A	A	A	A	A	A	A	A	A	A	A	A	T	A	A	A	A
Y	2774070	1 to 17	C	T	C	T	C	T	C	C	C	C	C	C	C	C	C	C	C	C	C	C	C	C
Y	2776122	15 to 16	A	G	A	A	A	A	G	A	A	A	A	A	A	A	A	A	G	A	A	A	A	A
Y	2776671	1 to 2	G	C	G	G	C	G	C	C	C	C	C	C	C	C	C	C	C	C	C	C	C	C
Y	2776688	1 to 2	C	T	C	C	T	C	T	T	T	T	T	T	T	T	T	T	T	T	T	T	T	T
Y	2776986	1 to 17	G	A	G	A	G	A	G	G	G	G	G	G	G	G	G	G	G	G	G	G	G	G
Y	2777325	1 to 17	A	T	A	T	A	T	A	A	A	A	A	A	A	A	A	A	A	A	A	A	A	A
Y	2778016	1 to 17	T	C	T	C	T	C	T	T	T	T	T	T	T	T	T	T	T	T	T	T	T	T
Y	2784134	1 to 17	T	G	T	G	T	G	T	T	T	T	T	T	T	T	T	T	T	T	T	T	T	T
Y	2796830	15 to 16	G	A	G	G	G	G	A	G	G	G	G	G	G	G	G	G	A	G	G	G	G	G
Y	2797131	1 to 17	T	A	T	A	T	A	T	T	T	T	T	T	T	T	T	T	T	T	T	T	T	T
Y	2797191	3 to 15	C	T	C	C	C	C	T	C	C	C	C	C	C	C	C	T	T	C	C	C	C	C
Y	2797788	1 to 2	A	G	A	A	G	A	G	G	G	G	G	G	G	G	G	G	G	G	G	G	G	G
Y	2798252	1 to 2	C	A	C	C	A	C	A	A	A	A	A	A	A	A	A	A	A	A	A	A	A	A
Y	2798445	4 to 12	C	G	C	C	C	C	C	C	C	C	C	G	G	G	G	C	C	C	C	C	C	C
Y	2798521	1 to 2	C	T	C	C	T	C	T	T	T	T	T	T	T	T	T	T	T	T	T	T	T	T
Y	2799345	1 to 17	C	T	C	T	C	T	C	C	C	C	C	C	C	C	C	C	C	C	C	C	C	C
Y	2800966	2 to PTT_Vaillant	A	C	A	A	A	A	A	A	A	A	A	A	A	A	A	A	A	C	A	A	A	A
Y	2800972	4 to 5	T	C	T	T	C	T	T	C	C	C	C	T	T	T	T	T	T	T	C	C	C	C
Y	2800981	2 to PTT_Vaillant	T	G	T	T	T	T	T	T	T	T	T	T	T	T	T	T	T	G	T	T	T	T
Y	2800999	1 to 17	C	T	C	T	C	T	C	C	C	C	C	C	C	C	C	C	C	C	C	C	C	C
Y	2802092	3 to 15	G	A	G	G	G	G	A	G	G	G	G	G	G	G	G	A	A	G	G	G	G	G
Y	2802158	1 to 2	G	T	G	G	T	G	T	T	T	T	T	T	T	T	T	T	T	T	T	T	T	T
Y	2802703	4 to 12	A	G	A	A	A	A	A	A	A	A	A	G	G	G	G	A	A	A	A	A	A	A
Y	2804368	2 to PTT_Vaillant	T	G	T	T	T	T	T	T	T	T	T	T	T	T	T	T	T	G	T	T	T	T
Y	2804393	4 to 12	C	T	C	C	C	C	C	C	C	C	C	T	T	T	T	C	C	C	C	C	C	C
Y	2804507	1 to 17	A	C	A	C	A	C	A	A	A	A	A	A	A	A	A	A	A	A	A	A	A	A
Y	2804699	12 to 13	C	G	C	C	C	C	C	C	C	C	C	G	C	G	G	C	C	C	C	C	C	C
Y	2804746	3 to 15	A	C	A	A	A	A	C	A	A	A	A	A	A	A	A	C	C	A	A	A	A	A
Y	2804783	1 to 17	T	A	T	A	T	A	T	T	T	T	T	T	T	T	T	T	T	T	T	T	T	T
Y	2804885	15 to PTS_Vincent	A	G	A	A	A	A	A	A	A	A	A	A	A	A	A	G	A	A	A	A	A	A
Y	2805388	11 to PTV_8	G	A	G	G	G	G	G	G	G	G	A	G	G	G	G	G	G	G	G	G	G	G
Y	2805792	2 to PTT_Vaillant	A	G	A	A	A	A	A	A	A	A	A	A	A	A	A	A	A	G	A	A	A	A
Y	2805863	3 to 4	T	G	T	T	G	T	T	G	G	G	G	G	G	G	G	T	T	T	G	G	G	G
Y	2805941	1 to 2	C	T	C	C	T	C	T	T	T	T	T	T	T	T	T	T	T	T	T	T	T	T
Y	2806345	1 to 17	C	A	C	A	C	A	C	C	C	C	C	C	C	C	C	C	C	C	C	C	C	C
Y	2806518	1 to 17	T	G	T	G	T	G	T	T	T	T	T	T	T	T	T	T	T	T	T	T	T	T
Y	2807094	12 to PTE_Basho	T	A	T	T	T	T	T	T	T	T	T	T	A	T	T	T	T	T	T	T	T	T
Y	2807288	3 to 15	C	T	C	C	C	C	T	C	C	C	C	C	C	C	C	T	T	C	C	C	C	C
Y	2807656	2 to PTT_Vaillant	C	G	C	C	C	C	C	C	C	C	C	C	C	C	C	C	C	G	C	C	C	C
Y	2807732	1 to 17	T	C	T	C	T	C	T	T	T	T	T	T	T	T	T	T	T	T	T	T	T	T
Y	2808131	4 to 12	A	G	A	A	A	A	A	A	A	A	A	G	G	G	G	A	A	A	A	A	A	A
Y	2811821	1 to 2	T	C	T	T	C	T	C	C	C	C	C	C	C	C	C	C	C	C	C	C	C	C
Y	2811901	1 to 17	T	C	T	C	T	C	T	T	T	T	T	T	T	T	T	T	T	T	T	T	T	T
Y	2812022	1 to 2	G	A	G	G	A	G	A	A	A	A	A	A	A	A	A	A	A	A	A	A	A	A
Y	2812504	12 to PTE_Basho	T	A	T	T	T	T	T	T	T	T	T	T	A	T	T	T	T	T	T	T	T	T
Y	2812613	1 to 17	G	A	G	A	G	A	G	G	G	G	G	G	G	G	G	G	G	G	G	G	G	G
Y	2812663	1 to 2	C	T	T	T	C	T	C	C	C	C	C	C	C	C	C	C	C	C	C	C	C	C
Y	2814453	2 to PTT_Vaillant	A	G	A	A	A	A	A	A	A	A	A	A	A	A	A	A	A	G	A	A	A	A
Y	2814641	1 to 17	A	C	A	C	A	C	A	A	A	A	A	A	A	A	A	A	A	A	A	A	A	A
Y	2814646	1 to 17	A	G	A	G	A	G	A	A	A	A	A	A	A	A	A	A	A	A	A	A	A	A
Y	2814790	1 to 17	G	C	G	C	G	C	G	G	G	G	G	G	G	G	G	G	G	G	G	G	G	G
Y	2814799	3 to 15	G	A	G	G	G	G	A	G	G	G	G	G	G	G	G	A	A	G	G	G	G	G
Y	2815833	1 to 17	T	C	T	C	T	C	T	T	T	T	T	T	T	T	T	T	T	T	T	T	T	T
Y	2815840	4 to 5	G	A	G	G	A	G	G	A	A	A	A	G	G	G	G	G	G	G	A	A	A	A
Y	2816742	1 to 17	A	G	A	G	A	G	A	A	A	A	A	A	A	A	A	A	A	A	A	A	A	A
Y	2816750	2 to 3	A	G	A	A	G	A	G	G	G	G	G	G	G	G	G	G	G	A	G	G	G	G
Y	2816788	1 to 2	C	T	T	T	C	T	C	C	C	C	C	C	C	C	C	C	C	C	C	C	C	C
Y	2816789	1 to 2	G	A	G	G	A	G	A	A	A	A	A	A	A	A	A	A	A	A	A	A	A	A
Y	2816908	1 to 2	A	T	A	A	T	A	T	T	T	T	T	T	T	T	T	T	T	T	T	T	T	T
Y	2817128	4 to 5	G	A	G	G	A	G	G	A	A	A	A	G	G	G	G	G	G	G	A	A	A	A
Y	2817654	1 to 17	T	G	T	G	T	G	T	T	T	T	T	T	T	T	T	T	T	T	T	T	T	T
Y	2817663	4 to 5	G	C	G	G	C	G	G	C	C	C	C	G	G	G	G	G	G	G	C	C	C	C
Y	2817798	4 to 5	A	G	A	A	G	A	A	G	G	G	G	A	A	A	A	A	A	A	G	G	G	G
Y	2818384	1 to 17	C	G	C	G	C	G	C	C	C	C	C	C	C	C	C	C	C	C	C	C	C	C
Y	2818574	1 to 2	G	A	G	G	A	G	A	A	A	A	A	A	A	A	A	A	A	A	A	A	A	A
Y	2818786	1 to 17	A	G	A	G	A	G	A	A	A	A	A	A	A	A	A	A	A	A	A	A	A	A
Y	2818855	17 to PTT_Moritz	T	C	T	T	T	C	T	T	T	T	T	T	T	T	T	T	T	T	T	T	T	T
Y	2819038	1 to 2	T	C	C	C	T	C	T	T	T	T	T	T	T	T	T	T	T	T	T	T	T	T
Y	2819060	2 to 3	A	T	A	A	T	A	T	T	T	T	T	T	T	T	T	T	T	A	T	T	T	T
Y	2819659	1 to 17	C	T	C	T	C	T	C	C	C	C	C	C	C	C	C	C	C	C	C	C	C	C
Y	2819865	1 to 17	G	A	G	A	G	A	G	G	G	G	G	G	G	G	G	G	G	G	G	G	G	G
Y	2820463	1 to 2	T	G	T	T	G	T	G	G	G	G	G	G	G	G	G	G	G	G	G	G	G	G
Y	2820558	1 to 2	G	A	G	G	A	G	A	A	A	A	A	A	A	A	A	A	A	A	A	A	A	A
Y	2821463	1 to 2	T	C	T	T	C	T	C	C	C	C	C	C	C	C	C	C	C	C	C	C	C	C
Y	2822084	1 to 17	T	C	T	C	T	C	T	T	T	T	T	T	T	T	T	T	T	T	T	T	T	T
Y	2823919	3 to 15	T	G	T	T	T	T	G	T	T	T	T	T	T	T	T	G	G	T	T	T	T	T
Y	2824352	12 to 13	A	G	A	A	A	A	A	A	A	A	A	G	A	G	G	A	A	A	A	A	A	A
Y	2826235	1 to 2	A	T	A	A	T	A	T	T	T	T	T	T	T	T	T	T	T	T	T	T	T	T
Y	2826972	12 to 13	G	A	G	G	G	G	G	G	G	G	G	A	G	A	A	G	G	G	G	G	G	G
Y	2827119	1 to 17	A	G	A	G	A	G	A	A	A	A	A	A	A	A	A	A	A	A	A	A	A	A
Y	2827172	4 to 12	T	A	T	T	T	T	T	T	T	T	T	A	A	A	A	T	T	T	T	T	T	T
Y	2827714	1 to 17	A	G	A	G	A	G	A	A	A	A	A	A	A	A	A	A	A	A	A	A	A	A
Y	2827902	1 to 2	T	C	T	T	C	T	C	C	C	C	C	C	C	C	C	C	C	C	C	C	C	C
Y	2828043	4 to 12	A	G	A	A	A	A	A	A	A	A	A	G	G	G	G	A	A	A	A	A	A	A
Y	2828156	1 to 2	G	A	G	G	A	G	A	A	A	A	A	A	A	A	A	A	A	A	A	A	A	A
Y	2828305	1 to 2	G	A	G	G	A	G	A	A	A	A	A	A	A	A	A	A	A	A	A	A	A	A
Y	2829899	1 to 17	A	G	A	G	A	G	A	A	A	A	A	A	A	A	A	A	A	A	A	A	A	A
Y	2830247	3 to 15	G	C	G	G	G	G	C	G	G	G	G	G	G	G	G	C	C	G	G	G	G	G
Y	2830346	4 to 5	G	A	A	A	G	A	A	G	G	G	G	A	A	A	A	A	A	A	G	G	G	G
Y	2831565	12 to PTE_Basho	G	A	G	G	G	G	G	G	G	G	G	G	A	G	G	G	G	G	G	G	G	G
Y	2831792	2 to PTT_Vaillant	G	T	G	G	G	G	G	G	G	G	G	G	G	G	G	G	G	T	G	G	G	G
Y	2835387	1 to 2	G	A	G	G	A	G	A	A	A	A	A	A	A	A	A	A	A	A	A	A	A	A
Y	2835417	3 to 15	G	A	G	G	G	G	A	G	G	G	G	G	G	G	G	A	A	G	G	G	G	G
Y	2835584	1 to 2	A	G	A	A	G	A	G	G	G	G	G	G	G	G	G	G	G	G	G	G	G	G
Y	2835679	3 to 15	C	T	C	C	C	C	T	C	C	C	C	C	C	C	C	T	T	C	C	C	C	C
Y	2836696	1 to 17	C	G	C	G	C	G	C	C	C	C	C	C	C	C	C	C	C	C	C	C	C	C
Y	2836884	1 to 2	C	T	C	C	T	C	T	T	T	T	T	T	T	T	T	T	T	T	T	T	T	T
Y	2837052	1 to 17	G	A	G	A	G	A	G	G	G	G	G	G	G	G	G	G	G	G	G	G	G	G
Y	2838264	2 to PTT_Vaillant	G	A	G	G	G	G	G	G	G	G	G	G	G	G	G	G	G	A	G	G	G	G
Y	2838525	15 to 16	A	G	A	A	A	A	G	A	A	A	A	A	A	A	A	A	G	A	A	A	A	A
Y	2839151	15 to PTS_Vincent	T	G	T	T	T	T	T	T	T	T	T	T	T	T	T	G	T	T	T	T	T	T
Y	2839589	1 to 17	T	G	T	G	T	G	T	T	T	T	T	T	T	T	T	T	T	T	T	T	T	T
Y	2840453	4 to 5	T	C	T	T	C	T	T	C	C	C	C	T	T	T	T	T	T	T	C	C	C	C
Y	2841472	2 to PTT_Vaillant	T	C	T	T	T	T	T	T	T	T	T	T	T	T	T	T	T	C	T	T	T	T
Y	2842148	2 to PTT_Vaillant	T	A	T	T	T	T	T	T	T	T	T	T	T	T	T	T	T	A	T	T	T	T
Y	2842369	12 to 13	C	G	C	C	C	C	C	C	C	C	C	G	C	G	G	C	C	C	C	C	C	C
Y	2842476	1 to 2	C	T	C	C	T	C	T	T	T	T	T	T	T	T	T	T	T	T	T	T	T	T
Y	2843018	15 to PTS_Vincent	G	A	G	G	G	G	G	G	G	G	G	G	G	G	G	A	G	G	G	G	G	G
Y	2843709	17 to PTT_Moritz	T	A	T	T	T	A	T	T	T	T	T	T	T	T	T	T	T	T	T	T	T	T
Y	2843804	1 to 2	T	C	C	C	T	C	T	T	T	T	T	T	T	T	T	T	T	T	T	T	T	T
Y	2843853	1 to 17	T	C	T	C	T	C	T	T	T	T	T	T	T	T	T	T	T	T	T	T	T	T
Y	2844011	15 to 16	G	C	G	G	G	G	C	G	G	G	G	G	G	G	G	G	C	G	G	G	G	G
Y	2844507	1 to 17	G	A	G	A	G	A	G	G	G	G	G	G	G	G	G	G	G	G	G	G	G	G
Y	2844687	1 to 2	A	T	A	A	T	A	T	T	T	T	T	T	T	T	T	T	T	T	T	T	T	T
Y	2845961	3 to 4	G	T	G	G	T	G	G	T	T	T	T	T	T	T	T	G	G	G	T	T	T	T
Y	2846374	1 to 17	T	C	T	C	T	C	T	T	T	T	T	T	T	T	T	T	T	T	T	T	T	T
Y	2846472	1 to 2	T	C	T	T	C	T	C	C	C	C	C	C	C	C	C	C	C	C	C	C	C	C
Y	2846650	2 to PTT_Vaillant	G	A	G	G	G	G	G	G	G	G	G	G	G	G	G	G	G	A	G	G	G	G
Y	2847059	1 to 17	C	T	C	T	C	T	C	C	C	C	C	C	C	C	C	C	C	C	C	C	C	C
Y	2847431	1 to 2	C	G	C	C	G	C	G	G	G	G	G	G	G	G	G	G	G	G	G	G	G	G
Y	2847476	1 to 17	G	T	G	T	G	T	G	G	G	G	G	G	G	G	G	G	G	G	G	G	G	G
Y	2848113	1 to 17	A	G	A	G	A	G	A	A	A	A	A	A	A	A	A	A	A	A	A	A	A	A
Y	2848509	15 to PTS_Vincent	A	T	A	A	A	A	A	A	A	A	A	A	A	A	A	T	A	A	A	A	A	A
Y	2848759	4 to 5	A	C	A	A	C	A	A	C	C	C	C	A	A	A	A	A	A	A	C	C	C	C
Y	2849130	1 to 17	A	C	A	C	A	C	A	A	A	A	A	A	A	A	A	A	A	A	A	A	A	A
Y	2849855	1 to 2	C	G	C	C	G	C	G	G	G	G	G	G	G	G	G	G	G	G	G	G	G	G
Y	2849895	1 to 17	T	C	T	C	T	C	T	T	T	T	T	T	T	T	T	T	T	T	T	T	T	T
Y	2851123	1 to 17	C	T	T	C	T	C	T	T	T	T	T	T	T	T	T	T	T	T	T	T	T	T
Y	2851140	1 to 17	A	G	A	G	A	G	A	A	A	A	A	A	A	A	A	A	A	A	A	A	A	A
Y	2851150	1 to 17	A	G	A	G	A	G	A	A	A	A	A	A	A	A	A	A	A	A	A	A	A	A
Y	2851160	1 to 17	T	A	T	A	T	A	T	T	T	T	T	T	T	T	T	T	T	T	T	T	T	T
Y	2851584	4 to 5	A	T	A	A	T	A	A	T	T	T	T	A	A	A	A	A	A	A	T	T	T	T
Y	2851586	1 to 17	A	G	A	G	A	G	A	A	A	A	A	A	A	A	A	A	A	A	A	A	A	A
Y	2851731	3 to 4	T	G	T	T	G	T	T	G	G	G	G	G	G	G	G	T	T	T	G	G	G	G
Y	2861654	12 to 13	T	C	T	T	T	T	T	T	T	T	T	C	T	C	C	T	T	T	T	T	T	T
Y	2862124	4 to 5	A	G	A	A	G	A	A	G	G	G	G	A	A	A	A	A	A	A	G	G	G	G
Y	2862879	2 to PTT_Vaillant	A	G	A	A	A	A	A	A	A	A	A	A	A	A	A	A	A	G	A	A	A	A
Y	2863147	15 to 16	C	T	C	C	C	C	T	C	C	C	C	C	C	C	C	C	T	C	C	C	C	C
Y	2863268	3 to 15	G	C	G	G	G	G	C	G	G	G	G	G	G	G	G	C	C	G	G	G	G	G
Y	2867240	12 to 13	T	C	T	T	T	T	T	T	T	T	T	C	T	C	C	T	T	T	T	T	T	T
Y	2867634	2 to PTT_Vaillant	C	T	C	C	C	C	C	C	C	C	C	C	C	C	C	C	C	T	C	C	C	C
Y	2870095	14 to PTE_Akwaya_Jean	A	G	A	A	A	A	A	A	A	A	A	G	A	A	A	A	A	A	A	A	A	A
Y	2870124	2 to PTT_Vaillant	T	C	T	T	T	T	T	T	T	T	T	T	T	T	T	T	T	C	T	T	T	T
Y	2870376	17 to PTT_Moritz	C	T	C	C	C	T	C	C	C	C	C	C	C	C	C	C	C	C	C	C	C	C
Y	2870523	3 to 15	C	G	C	C	C	C	G	C	C	C	C	C	C	C	C	G	G	C	C	C	C	C
Y	2875255	3 to 15	C	T	C	C	C	C	T	C	C	C	C	C	C	C	C	T	T	C	C	C	C	C
Y	2875470	1 to 17	G	A	G	A	G	A	G	G	G	G	G	G	G	G	G	G	G	G	G	G	G	G
Y	2875519	3 to 15	C	T	C	C	C	C	T	C	C	C	C	C	C	C	C	T	T	C	C	C	C	C
Y	2875644	1 to 17	A	G	A	G	A	G	A	A	A	A	A	A	A	A	A	A	A	A	A	A	A	A
Y	2875736	3 to 15	G	C	G	G	G	G	C	G	G	G	G	G	G	G	G	C	C	G	G	G	G	G
Y	2875924	4 to 5	C	T	C	C	T	C	C	T	T	T	T	C	C	C	C	C	C	C	T	T	T	T
Y	2876325	12 to PTE_Basho	G	A	G	G	G	G	G	G	G	G	G	G	A	G	G	G	G	G	G	G	G	G
Y	2878250	2 to PTT_Vaillant	A	G	A	A	A	A	A	A	A	A	A	A	A	A	A	A	A	G	A	A	A	A
Y	2878409	4 to 12	A	G	A	A	A	A	A	A	A	A	A	G	G	G	G	A	A	A	A	A	A	A
Y	2878422	12 to 13	C	T	C	C	C	C	C	C	C	C	C	T	C	T	T	C	C	C	C	C	C	C
Y	2878423	1 to 2	T	G	T	T	G	T	G	G	G	G	G	G	G	G	G	G	G	G	G	G	G	G
Y	2879669	4 to 5	C	T	C	C	T	C	C	T	T	T	T	C	C	C	C	C	C	C	T	T	T	T
Y	2880330	2 to PTT_Vaillant	C	T	C	C	C	C	C	C	C	C	C	C	C	C	C	C	C	T	C	C	C	C
Y	2880496	4 to 12	T	C	T	T	T	T	T	T	T	T	T	C	C	C	C	T	T	T	T	T	T	T
Y	2880530	1 to 2	T	C	T	T	C	T	C	C	C	C	C	C	C	C	C	C	C	C	C	C	C	C
Y	2885905	1 to 17; 4 to 5	C	T	C	T	T	T	C	T	T	T	T	C	C	C	C	C	C	C	T	T	T	T
Y	2886286	1 to 17	T	C	T	C	T	C	T	T	T	T	T	T	T	T	T	T	T	T	T	T	T	T
Y	2886288	1 to 17	C	T	C	T	C	T	C	C	C	C	C	C	C	C	C	C	C	C	C	C	C	C
Y	2886452	3 to 15	A	C	A	A	A	A	C	A	A	A	A	A	A	A	A	C	C	A	A	A	A	A
Y	2886525	2 to PTT_Vaillant	C	T	C	C	C	C	C	C	C	C	C	C	C	C	C	C	C	T	C	C	C	C
Y	2886574	4 to 12	C	G	C	C	C	C	C	C	C	C	C	G	G	G	G	C	C	C	C	C	C	C
Y	2886661	2 to PTT_Vaillant	T	C	T	T	T	T	T	T	T	T	T	T	T	T	T	T	T	C	T	T	T	T
Y	2886792	1 to 17	C	G	C	G	C	G	C	C	C	C	C	C	C	C	C	C	C	C	C	C	C	C
Y	2886809	1 to 2	C	G	C	C	G	C	G	G	G	G	G	G	G	G	G	G	G	G	G	G	G	G
Y	2886811	1 to 2	C	T	C	C	T	C	T	T	T	T	T	T	T	T	T	T	T	T	T	T	T	T
Y	2886866	1 to 2	G	T	G	G	T	G	T	T	T	T	T	T	T	T	T	T	T	T	T	T	T	T
Y	2886917	4 to 5	A	G	A	A	G	A	A	G	G	G	G	A	A	A	A	A	A	A	G	G	G	G
Y	2886964	1 to 17	C	G	C	G	C	G	C	C	C	C	C	C	C	C	C	C	C	C	C	C	C	C
Y	2886982	2 to PTT_Vaillant	A	T	A	A	A	A	A	A	A	A	A	A	A	A	A	A	A	T	A	A	A	A
Y	2887064	3 to 4	C	T	C	C	T	C	C	T	T	T	T	T	T	T	T	C	C	C	T	T	T	T
Y	2887094	17 to PTT_Moritz	C	T	C	C	C	T	C	C	C	C	C	C	C	C	C	C	C	C	C	C	C	C
Y	2887341	10 to 11	C	T	C	C	C	C	C	C	T	C	T	C	C	C	C	C	C	C	C	C	C	C
Y	2887362	2 to PTT_Vaillant	G	A	G	G	G	G	G	G	G	G	G	G	G	G	G	G	G	A	G	G	G	G
Y	2887425	1 to 2	T	C	T	T	C	T	C	C	C	C	C	C	C	C	C	C	C	C	C	C	C	C
Y	2887429	1 to 17	C	G	C	G	C	G	C	C	C	C	C	C	C	C	C	C	C	C	C	C	C	C
Y	2887977	3 to 15	G	A	G	G	G	G	A	G	G	G	G	G	G	G	G	A	A	G	G	G	G	G
Y	2887990	1 to 17	G	C	G	C	G	C	G	G	G	G	G	G	G	G	G	G	G	G	G	G	G	G
Y	2888184	2 to PTT_Vaillant	G	A	G	G	G	G	G	G	G	G	G	G	G	G	G	G	G	A	G	G	G	G
Y	2888272	1 to 2	T	G	T	T	G	T	G	G	G	G	G	G	G	G	G	G	G	G	G	G	G	G
Y	2888289	1 to 17	G	C	G	C	G	C	G	G	G	G	G	G	G	G	G	G	G	G	G	G	G	G
Y	2888343	1 to 2	C	T	C	C	T	C	T	T	T	T	T	T	T	T	T	T	T	T	T	T	T	T
Y	2888398	1 to 17	G	A	G	A	G	A	G	G	G	G	G	G	G	G	G	G	G	G	G	G	G	G
Y	2888431	2 to PTT_Vaillant	G	C	G	G	G	G	G	G	G	G	G	G	G	G	G	G	G	C	G	G	G	G
Y	2888638	1 to 17	G	C	G	C	G	C	G	G	G	G	G	G	G	G	G	G	G	G	G	G	G	G
Y	2889180	3 to 15	T	C	T	T	T	T	C	T	T	T	T	T	T	T	T	C	C	T	T	T	T	T
Y	2889815	2 to PTT_Vaillant	C	T	C	C	C	C	C	C	C	C	C	C	C	C	C	C	C	T	C	C	C	C
Y	2889837	12 to PTE_Basho	T	G	T	T	T	T	T	T	T	T	T	T	G	T	T	T	T	T	T	T	T	T
Y	2889869	12 to PTE_Basho	A	G	A	A	A	A	A	A	A	A	A	A	G	A	A	A	A	A	A	A	A	A
Y	2889938	1 to 17	T	C	T	C	T	C	T	T	T	T	T	T	T	T	T	T	T	T	T	T	T	T
Y	2890632	2 to PTT_Vaillant	T	A	T	T	T	T	T	T	T	T	T	T	T	T	T	T	T	A	T	T	T	T
Y	2891945	4 to 12	C	A	C	C	C	C	C	C	C	C	C	A	A	A	A	C	C	C	C	C	C	C
Y	2903672	1 to 2	T	C	T	T	C	T	C	C	C	C	C	C	C	C	C	C	C	C	C	C	C	C
Y	2903944	15 to PTS_Vincent	T	C	T	T	T	T	T	T	T	T	T	T	T	T	T	C	T	T	T	T	T	T
Y	2904177	4 to 5	C	T	C	C	T	C	C	T	T	T	T	C	C	C	C	C	C	C	T	T	T	T
Y	2904312	4 to 12	G	T	G	G	G	G	G	G	G	G	G	T	T	T	T	G	G	G	G	G	G	G
Y	2905216	2 to PTT_Vaillant	C	A	C	C	C	C	C	C	C	C	C	C	C	C	C	C	C	A	C	C	C	C
Y	2905224	1 to 17	C	T	C	T	C	T	C	C	C	C	C	C	C	C	C	C	C	C	C	C	C	C
Y	2908155	1 to 2	A	G	A	A	G	A	G	G	G	G	G	G	G	G	G	G	G	G	G	G	G	G
Y	2908378	1 to 2	A	G	A	A	G	A	G	G	G	G	G	G	G	G	G	G	G	G	G	G	G	G
Y	2908781	1 to 17	G	T	G	T	G	T	G	G	G	G	G	G	G	G	G	G	G	G	G	G	G	G
Y	2908851	1 to 17	G	C	G	C	G	C	G	G	G	G	G	G	G	G	G	G	G	G	G	G	G	G
Y	2908869	1 to 17	C	G	C	G	C	G	C	C	C	C	C	C	C	C	C	C	C	C	C	C	C	C
Y	2909061	16 to PTS_Bobby	A	G	A	A	A	A	G	A	A	A	A	A	A	A	A	A	A	A	A	A	A	A
Y	2909103	1 to 2	G	A	G	G	A	G	A	A	A	A	A	A	A	A	A	A	A	A	A	A	A	A
Y	2909316	1 to 17; 12 to PTE_Basho	A	C	C	A	C	A	C	C	C	C	C	C	A	C	C	C	C	C	C	C	C	C
Y	2909471	3 to 15	C	A	C	C	C	C	A	C	C	C	C	C	C	C	C	A	A	C	C	C	C	C
Y	2909505	1 to 2	G	C	G	G	C	G	C	C	C	C	C	C	C	C	C	C	C	C	C	C	C	C
Y	2909647	1 to 17	G	C	G	C	G	C	G	G	G	G	G	G	G	G	G	G	G	G	G	G	G	G
Y	2910053	2 to PTT_Vaillant	A	G	A	A	A	A	A	A	A	A	A	A	A	A	A	A	A	G	A	A	A	A
Y	2910195	1 to 17	A	C	A	C	A	C	A	A	A	A	A	A	A	A	A	A	A	A	A	A	A	A
Y	2910566	1 to 2	A	G	A	A	G	A	G	G	G	G	G	G	G	G	G	G	G	G	G	G	G	G
Y	2911118	1 to 17	A	G	A	G	A	G	A	A	A	A	A	A	A	A	A	A	A	A	A	A	A	A
Y	2911413	12 to PTE_Basho	C	T	C	C	C	C	C	C	C	C	C	C	T	C	C	C	C	C	C	C	C	C
Y	2913277	2 to PTT_Vaillant	C	A	C	C	C	C	C	C	C	C	C	C	C	C	C	C	C	A	C	C	C	C
Y	2913409	2 to PTT_Vaillant	G	A	G	G	G	G	G	G	G	G	G	G	G	G	G	G	G	A	G	G	G	G
Y	2914278	4 to 5	C	G	C	C	G	C	C	G	G	G	G	C	C	C	C	C	C	C	G	G	G	G
Y	2914431	3 to 15	C	G	C	C	C	C	G	C	C	C	C	C	C	C	C	G	G	C	C	C	C	C
Y	2914661	1 to 17	T	A	T	A	T	A	T	T	T	T	T	T	T	T	T	T	T	T	T	T	T	T
Y	2914766	1 to 2	G	A	G	G	A	G	A	A	A	A	A	A	A	A	A	A	A	A	A	A	A	A
Y	6627180	12 to 13	C	G,T	G	G	G	G	G	G	G	G	G	T	G	T	T	G	G	G	G	G	G	G
Y	6627578	1 to 17	G	A	G	A	G	A	G	G	G	G	G	G	G	G	G	G	G	G	G	G	G	G
Y	6627615	1 to 2	G	C	G	G	C	G	C	C	C	C	C	C	C	C	C	C	C	C	C	C	C	C
Y	6627873	1 to 17	T	C	T	C	T	C	T	T	T	T	T	T	T	T	T	T	T	T	T	T	T	T
Y	6628000	1 to 17	T	C	T	C	T	C	T	T	T	T	T	T	T	T	T	T	T	T	T	T	T	T
Y	6628028	1 to 2	C	T	C	C	T	C	T	T	T	T	T	T	T	T	T	T	T	T	T	T	T	T
Y	6628267	1 to 17	T	C	T	C	T	C	T	T	T	T	T	T	T	T	T	T	T	T	T	T	T	T
Y	6628475	4 to 12	A	T	A	A	A	A	A	A	A	A	A	T	T	T	T	A	A	A	A	A	A	A
Y	6630245	4 to 5	T	A	T	T	A	T	T	A	A	A	A	T	T	T	T	T	T	T	A	A	A	A
Y	6630627	12 to 13	C	T	C	C	C	C	C	C	C	C	C	T	C	T	T	C	C	C	C	C	C	C
Y	6630652	1 to 17	G	A	G	A	G	A	G	G	G	G	G	G	G	G	G	G	G	G	G	G	G	G
Y	6630786	3 to 15	A	G	G	G	G	G	A	G	G	G	G	G	G	G	G	A	A	G	G	G	G	G
Y	6630825	4 to 5	A	T	A	A	T	A	A	T	T	T	T	A	A	A	A	A	A	A	T	T	T	T
Y	6631108	1 to 17	T	A	T	A	T	A	T	T	T	T	T	T	T	T	T	T	T	T	T	T	T	T
Y	6631114	4 to 5	C	T	C	C	T	C	C	T	T	T	T	C	C	C	C	C	C	C	T	T	T	T
Y	6632460	4 to 5	T	A	T	T	A	T	T	A	A	A	A	T	T	T	T	T	T	T	A	A	A	A
Y	6632552	4 to 12	G	A	G	G	G	G	G	G	G	G	G	A	A	A	A	G	G	G	G	G	G	G
Y	6636241	1 to 17	C	T	T	C	T	C	T	T	T	T	T	T	T	T	T	T	T	T	T	T	T	T
Y	6636438	1 to 17	G	T	G	T	G	T	G	G	G	G	G	G	G	G	G	G	G	G	G	G	G	G
Y	6636569	1 to 2	G	C	G	G	C	G	C	C	C	C	C	C	C	C	C	C	C	C	C	C	C	C
Y	6636593	1 to 2	G	C	G	G	C	G	C	C	C	C	C	C	C	C	C	C	C	C	C	C	C	C
Y	6651034	1 to 2	C	T	C	C	T	C	T	T	T	T	T	T	T	T	T	T	T	T	T	T	T	T
Y	6651127	1 to 17	G	C	G	C	G	C	G	G	G	G	G	G	G	G	G	G	G	G	G	G	G	G
Y	6651278	1 to 17	G	A	G	A	G	A	G	G	G	G	G	G	G	G	G	G	G	G	G	G	G	G
Y	6651401	12 to PTE_Basho	C	G	C	C	C	C	C	C	C	C	C	C	G	C	C	C	C	C	C	C	C	C
Y	6931805	12 to PTE_Basho	G	A	G	G	G	G	G	G	G	G	G	G	A	G	G	G	G	G	G	G	G	G
Y	6932003	4 to 5	T	C	T	T	C	T	T	C	C	C	C	T	T	T	T	T	T	T	C	C	C	C
Y	6932334	1 to 2	A	G	A	A	G	A	G	G	G	G	G	G	G	G	G	G	G	G	G	G	G	G
Y	6932650	1 to 2	G	A	G	G	A	G	A	A	A	A	A	A	A	A	A	A	A	A	A	A	A	A
Y	6932831	1 to 17	A	G	G	A	G	A	G	G	G	G	G	G	G	G	G	G	G	G	G	G	G	G
Y	6932958	1 to 2	G	C	G	G	C	G	C	C	C	C	C	C	C	C	C	C	C	C	C	C	C	C
Y	6932965	1 to 17	G	A	G	A	G	A	G	G	G	G	G	G	G	G	G	G	G	G	G	G	G	G
Y	6933542	1 to 2	C	T	C	C	T	C	T	T	T	T	T	T	T	T	T	T	T	T	T	T	T	T
Y	6933581	1 to 17	G	A	G	A	G	A	G	G	G	G	G	G	G	G	G	G	G	G	G	G	G	G
Y	6933771	15 to 16	G	C	G	G	G	G	C	G	G	G	G	G	G	G	G	G	C	G	G	G	G	G
Y	6934255	1 to 17	G	A	G	A	G	A	G	G	G	G	G	G	G	G	G	G	G	G	G	G	G	G
Y	6934381	1 to 2	A	G	A	A	G	A	G	G	G	G	G	G	G	G	G	G	G	G	G	G	G	G
Y	6934839	2 to PTT_Vaillant	C	T	C	C	C	C	C	C	C	C	C	C	C	C	C	C	C	T	C	C	C	C
Y	6935287	2 to PTT_Vaillant	C	T	C	C	C	C	C	C	C	C	C	C	C	C	C	C	C	T	C	C	C	C
Y	6935327	1 to 17	G	A	G	A	G	A	G	G	G	G	G	G	G	G	G	G	G	G	G	G	G	G
Y	6935418	4 to 5	G	A	G	G	A	G	G	A	A	A	A	G	G	G	G	G	G	G	A	A	A	A
Y	6935428	2 to PTT_Vaillant	G	T	G	G	G	G	G	G	G	G	G	G	G	G	G	G	G	T	G	G	G	G
Y	6935857	2 to PTT_Vaillant	C	A	C	C	C	C	C	C	C	C	C	C	C	C	C	C	C	A	C	C	C	C
Y	6935952	8 to PTE/PTV_EB176JC	T	A	T	T	T	T	T	A	T	T	T	T	T	T	T	T	T	T	T	T	T	T
Y	6936035	3 to 15	C	T	C	C	C	C	T	C	C	C	C	C	C	C	C	T	T	C	C	C	C	C
Y	6936653	1 to 17	T	C	T	C	T	C	T	T	T	T	T	T	T	T	T	T	T	T	T	T	T	T
Y	6936867	1 to 2	A	G	A	A	G	A	G	G	G	G	G	G	G	G	G	G	G	G	G	G	G	G
Y	6936901	2 to PTT_Vaillant	T	C	T	T	T	T	T	T	T	T	T	T	T	T	T	T	T	C	T	T	T	T
Y	6937283	16 to PTS_Bwambale	C	G	C	C	C	C	C	C	C	C	C	C	C	C	C	C	G	C	C	C	C	C
Y	6937864	1 to 17	G	A	G	A	G	A	G	G	G	G	G	G	G	G	G	G	G	G	G	G	G	G
Y	6937887	1 to ancestral; 15 to PTS_Vincent	A	G	A	G	G	G	G	G	G	G	G	G	G	G	G	A	G	G	G	G	G	G
Y	6938284	2 to PTT_Vaillant	C	T	C	C	C	C	C	C	C	C	C	C	C	C	C	C	C	T	C	C	C	C
Y	6938552	1 to 17	G	C	G	C	G	C	G	G	G	G	G	G	G	G	G	G	G	G	G	G	G	G
Y	6938790	1 to 17	A	G	A	G	A	G	A	A	A	A	A	A	A	A	A	A	A	A	A	A	A	A
Y	6940242	16 to PTS_Bwambale	A	G	A	A	A	A	A	A	A	A	A	A	A	A	A	A	G	A	A	A	A	A
Y	6940948	1 to 2	T	G	T	T	G	T	G	G	G	G	G	G	G	G	G	G	G	G	G	G	G	G
Y	6941003	1 to 17	A	G	A	G	A	G	A	A	A	A	A	A	A	A	A	A	A	A	A	A	A	A
Y	6941150	2 to 3	C	T	C	C	T	C	T	T	T	T	T	T	T	T	T	T	T	C	T	T	T	T
Y	6941400	2 to PTT_Vaillant	A	C	A	A	A	A	A	A	A	A	A	A	A	A	A	A	A	C	A	A	A	A
Y	6941532	1 to 17	G	A	G	A	G	A	G	G	G	G	G	G	G	G	G	G	G	G	G	G	G	G
Y	6941885	1 to 17	A	G	A	G	A	G	A	A	A	A	A	A	A	A	A	A	A	A	A	A	A	A
Y	6942032	15 to 16	G	A	G	G	G	G	A	G	G	G	G	G	G	G	G	G	A	G	G	G	G	G
Y	6942623	1 to 17	A	T	A	T	A	T	A	A	A	A	A	A	A	A	A	A	A	A	A	A	A	A
Y	6942640	3 to 15	C	T	C	C	C	C	T	C	C	C	C	C	C	C	C	T	T	C	C	C	C	C
Y	6942649	1 to 2	C	A	C	C	A	C	A	A	A	A	A	A	A	A	A	A	A	A	A	A	A	A
Y	6942714	2 to PTT_Vaillant	G	T	G	G	G	G	G	G	G	G	G	G	G	G	G	G	G	T	G	G	G	G
Y	6942771	1 to 17	C	T	C	T	C	T	C	C	C	C	C	C	C	C	C	C	C	C	C	C	C	C
Y	6942806	4 to 5	C	T	C	C	T	C	C	T	T	T	T	C	C	C	C	C	C	C	T	T	T	T
Y	6942903	3 to 15	G	A	G	G	G	G	A	G	G	G	G	G	G	G	G	A	A	G	G	G	G	G
Y	6942997	1 to 17	A	G	A	G	A	G	A	A	A	A	A	A	A	A	A	A	A	A	A	A	A	A
Y	6943219	1 to 17	G	A	G	A	G	A	G	G	G	G	G	G	G	G	G	G	G	G	G	G	G	G
Y	6943572	1 to 2	T	G	T	T	G	T	G	G	G	G	G	G	G	G	G	G	G	G	G	G	G	G
Y	6943588	12 to PTE_Basho	A	G	A	A	A	A	A	A	A	A	A	A	G	A	A	A	A	A	A	A	A	A
Y	6943690	1 to 2	A	G	A	A	G	A	G	G	G	G	G	G	G	G	G	G	G	G	G	G	G	G
Y	6943937	2 to PTT_Vaillant	T	C	C	C	C	C	C	C	C	C	C	C	C	C	C	C	C	T	C	C	C	C
Y	6944006	1 to 17	A	G	A	G	A	G	A	A	A	A	A	A	A	A	A	A	A	A	A	A	A	A
Y	6945617	1 to 17	G	T,C	T	C	T	C	T	T	T	T	T	T	T	T	T	T	T	T	T	T	T	T
Y	6945754	2 to PTT_Vaillant	T	C	C	C	C	C	C	C	C	C	C	C	C	C	C	C	C	T	C	C	C	C
Y	6945783	1 to 17	G	A	G	A	G	A	G	G	G	G	G	G	G	G	G	G	G	G	G	G	G	G
Y	6945972	4 to 5	A	G	A	A	G	A	A	G	G	G	G	A	A	A	A	A	A	A	G	G	G	G
Y	6946180	12 to PTE_Basho	C	T	C	C	C	C	C	C	C	C	C	C	T	C	C	C	C	C	C	C	C	C
Y	6946417	1 to 2	A	G	A	A	G	A	G	G	G	G	G	G	G	G	G	G	G	G	G	G	G	G
Y	6946440	12 to 13	C	G	C	C	C	C	C	C	C	C	C	G	C	G	G	C	C	C	C	C	C	C
Y	6947303	2 to PTT_Vaillant	C	T	C	C	C	C	C	C	C	C	C	C	C	C	C	C	C	T	C	C	C	C
Y	6947470	1 to 17	G	C	G	C	G	C	G	G	G	G	G	G	G	G	G	G	G	G	G	G	G	G
Y	6947526	3 to 15	T	C	T	T	T	T	C	T	T	T	T	T	T	T	T	C	C	T	T	T	T	T
Y	6948056	17 to PTT_Moritz	G	T	G	G	G	T	G	G	G	G	G	G	G	G	G	G	G	G	G	G	G	G
Y	6948479	4 to 5	A	G	A	A	G	A	A	G	G	G	G	A	A	A	A	A	A	A	G	G	G	G
Y	6948513	1 to 17	C	A	C	A	C	A	C	C	C	C	C	C	C	C	C	C	C	C	C	C	C	C
Y	6948922	2 to PTT_Vaillant	C	G	C	C	C	C	C	C	C	C	C	C	C	C	C	C	C	G	C	C	C	C
Y	6949089	4 to 5	T	A	T	T	A	T	T	A	A	A	A	T	T	T	T	T	T	T	A	A	A	A
Y	6949251	1 to 17	G	A	G	A	G	A	G	G	G	G	G	G	G	G	G	G	G	G	G	G	G	G
Y	6949442	4 to 5	G	C	G	G	C	G	G	C	C	C	C	G	G	G	G	G	G	G	C	C	C	C
Y	6949449	2 to PTT_Vaillant	C	T	C	C	C	C	C	C	C	C	C	C	C	C	C	C	C	T	C	C	C	C
Y	6950196	1 to 2	C	T	C	C	T	C	T	T	T	T	T	T	T	T	T	T	T	T	T	T	T	T
Y	6950261	2 to PTT_Vaillant	T	A	T	T	T	T	T	T	T	T	T	T	T	T	T	T	T	A	T	T	T	T
Y	6950994	1 to 2	C	T	C	C	T	C	T	T	T	T	T	T	T	T	T	T	T	T	T	T	T	T
Y	6951516	12 to PTE_Basho	C	G	C	C	C	C	C	C	C	C	C	C	G	C	C	C	C	C	C	C	C	C
Y	6951740	1 to 2	G	A	G	G	A	G	A	A	A	A	A	A	A	A	A	A	A	A	A	A	A	A
Y	6952075	1 to 17	A	T	A	T	A	T	A	A	A	A	A	A	A	A	A	A	A	A	A	A	A	A
Y	6952211	2 to PTT_Vaillant	C	T	C	C	C	C	C	C	C	C	C	C	C	C	C	C	C	T	C	C	C	C
Y	6952225	10 to 11	T	C	T	T	T	T	T	T	C	T	C	T	T	T	T	T	T	T	T	T	T	T
Y	6952578	4 to 12	C	T	C	C	C	C	C	C	C	C	C	T	T	T	T	C	C	C	C	C	C	C
Y	6952808	12 to 13	C	T	C	C	C	C	C	C	C	C	C	T	C	T	T	C	C	C	C	C	C	C
Y	6952960	2 to PTT_Vaillant; 4 to 12	C	T	C	C	C	C	C	C	C	C	C	T	T	T	T	C	C	T	C	C	C	C
Y	6953001	1 to 2	C	T	C	C	T	C	T	T	T	T	T	T	T	T	T	T	T	T	T	T	T	T
Y	6953018	1 to 17	C	T	C	T	C	T	C	C	C	C	C	C	C	C	C	C	C	C	C	C	C	C
Y	6953135	1 to 17	G	A	G	A	G	A	G	G	G	G	G	G	G	G	G	G	G	G	G	G	G	G
Y	6953414	3 to 15	G	A	G	G	G	G	A	G	G	G	G	G	G	G	G	A	A	G	G	G	G	G
Y	6953855	1 to 2	G	A	G	G	A	G	A	A	A	A	A	A	A	A	A	A	A	A	A	A	A	A
Y	6953927	3 to 15	G	T	G	G	G	G	T	G	G	G	G	G	G	G	G	T	T	G	G	G	G	G
Y	6954285	1 to 17	G	C	G	C	G	C	G	G	G	G	G	G	G	G	G	G	G	G	G	G	G	G
Y	6954330	12 to PTE_Basho	G	C	G	G	G	G	G	G	G	G	G	G	C	G	G	G	G	G	G	G	G	G
Y	6954467	1 to 2	C	T	C	C	T	C	T	T	T	T	T	T	T	T	T	T	T	T	T	T	T	T
Y	6954563	1 to 17	A	T	A	T	A	T	A	A	A	A	A	A	A	A	A	A	A	A	A	A	A	A
Y	6954657	1 to 17	C	T	C	T	C	T	C	C	C	C	C	C	C	C	C	C	C	C	C	C	C	C
Y	6955840	1 to 17	T	C	T	C	T	C	T	T	T	T	T	T	T	T	T	T	T	T	T	T	T	T
Y	6956279	2 to 3	C	G	C	C	G	C	G	G	G	G	G	G	G	G	G	G	G	C	G	G	G	G
Y	6956790	1 to 17	G	A	A	G	A	G	A	A	A	A	A	A	A	A	A	A	A	A	A	A	A	A
Y	6957048	1 to 17	C	T	C	T	C	T	C	C	C	C	C	C	C	C	C	C	C	C	C	C	C	C
Y	6957276	4 to 5	C	T	C	C	T	C	C	T	T	T	T	C	C	C	C	C	C	C	T	T	T	T
Y	6957951	1 to 17	A	C	A	C	A	C	A	A	A	A	A	A	A	A	A	A	A	A	A	A	A	A
Y	6958219	1 to 2	G	A	G	G	A	G	A	A	A	A	A	A	A	A	A	A	A	A	A	A	A	A
Y	6959160	15 to 16	T	C	T	T	T	T	C	T	T	T	T	T	T	T	T	T	C	T	T	T	T	T
Y	6959164	1 to 2	G	A	G	G	A	G	A	A	A	A	A	A	A	A	A	A	A	A	A	A	A	A
Y	6959255	1 to 17	T	C	T	C	T	C	T	T	T	T	T	T	T	T	T	T	T	T	T	T	T	T
Y	6959279	1 to 17	A	C	A	C	A	C	A	A	A	A	A	A	A	A	A	A	A	A	A	A	A	A
Y	6959484	1 to 17	G	C	G	C	G	C	G	G	G	G	G	G	G	G	G	G	G	G	G	G	G	G
Y	6959637	4 to 5	G	T	G	G	T	G	G	T	T	T	T	G	G	G	G	G	G	G	T	T	T	T
Y	6960080	1 to 2	G	C	G	G	C	G	C	C	C	C	C	C	C	C	C	C	C	C	C	C	C	C
Y	6960587	2 to PTT_Vaillant	G	A	G	G	G	G	G	G	G	G	G	G	G	G	G	G	G	A	G	G	G	G
Y	6961238	3 to 15	G	C	G	G	G	G	C	G	G	G	G	G	G	G	G	C	C	G	G	G	G	G
Y	6961285	16 to PTS_Bobby	G	A	G	G	G	G	A	G	G	G	G	G	G	G	G	G	G	G	G	G	G	G
Y	6961391	12 to 13	C	T	C	C	C	C	C	C	C	C	C	T	C	T	T	C	C	C	C	C	C	C
Y	6961417	1 to 17	T	C	C	T	C	T	C	C	C	C	C	C	C	C	C	C	C	C	C	C	C	C
Y	6962357	1 to 17	T	C	T	C	T	C	T	T	T	T	T	T	T	T	T	T	T	T	T	T	T	T
Y	6962486	1 to 2	A	G	A	A	G	A	G	G	G	G	G	G	G	G	G	G	G	G	G	G	G	G
Y	6963080	2 to PTT_Vaillant	T	G	T	T	T	T	T	T	T	T	T	T	T	T	T	T	T	G	T	T	T	T
Y	6963097	1 to 17	C	T	T	C	T	C	T	T	T	T	T	T	T	T	T	T	T	T	T	T	T	T
Y	6963361	2 to PTT_Vaillant	G	A	G	G	G	G	G	G	G	G	G	G	G	G	G	G	G	A	G	G	G	G
Y	6963467	1 to 17	G	T	G	T	G	T	G	G	G	G	G	G	G	G	G	G	G	G	G	G	G	G
Y	6963543	2 to PTT_Vaillant	A	G	A	A	A	A	A	A	A	A	A	A	A	A	A	A	A	G	A	A	A	A
Y	6963575	1 to 17	G	A	G	A	G	A	G	G	G	G	G	G	G	G	G	G	G	G	G	G	G	G
Y	6963950	1 to 17	A	G	A	G	A	G	A	A	A	A	A	A	A	A	A	A	A	A	A	A	A	A
Y	6964370	1 to 17	T	C	T	C	T	C	T	T	T	T	T	T	T	T	T	T	T	T	T	T	T	T
Y	6964868	1 to 17	A	C	A	C	A	C	A	A	A	A	A	A	A	A	A	A	A	A	A	A	A	A
Y	6965040	1 to 17	A	G	A	G	A	G	A	A	A	A	A	A	A	A	A	A	A	A	A	A	A	A
Y	6965204	1 to 17	C	T	C	T	C	T	C	C	C	C	C	C	C	C	C	C	C	C	C	C	C	C
Y	6967515	1 to 17	A	G	A	G	A	G	A	A	A	A	A	A	A	A	A	A	A	A	A	A	A	A
Y	6967724	4 to 5	G	C	G	G	C	G	G	C	C	C	C	G	G	G	G	G	G	G	C	C	C	C
Y	6968005	1 to 17	C	T	C	T	C	T	C	C	C	C	C	C	C	C	C	C	C	C	C	C	C	C
Y	6968026	1 to 2	G	T	G	G	T	G	T	T	T	T	T	T	T	T	T	T	T	T	T	T	T	T
Y	6968548	1 to 17	A	C	A	C	A	C	A	A	A	A	A	A	A	A	A	A	A	A	A	A	A	A
Y	6968584	2 to PTT_Vaillant	A	G	A	A	A	A	A	A	A	A	A	A	A	A	A	A	A	G	A	A	A	A
Y	6968930	1 to 2	G	A	G	G	A	G	A	A	A	A	A	A	A	A	A	A	A	A	A	A	A	A
Y	6968940	17 to PTT/PTV_Tommy	C	G	C	G	C	C	C	C	C	C	C	C	C	C	C	C	C	C	C	C	C	C
Y	6968942	17 to PTT/PTV_Tommy	C	G	C	G	C	C	C	C	C	C	C	C	C	C	C	C	C	C	C	C	C	C
Y	6970132	1 to 2	C	A,G	G	G	A	G	A	A	A	A	A	A	A	A	A	A	A	A	A	A	A	A
Y	6970348	15 to 16	T	C	T	T	T	T	C	T	T	T	T	T	T	T	T	T	C	T	T	T	T	T
Y	6970579	15 to PTS_Vincent	C	T	C	C	C	C	C	C	C	C	C	C	C	C	C	T	C	C	C	C	C	C
Y	6970885	1 to 2	T	C	T	T	C	T	C	C	C	C	C	C	C	C	C	C	C	C	C	C	C	C
Y	6971274	4 to 12	A	G	A	A	A	A	A	A	A	A	A	G	G	G	G	A	A	A	A	A	A	A
Y	6971594	1 to 17	G	T	G	T	G	T	G	G	G	G	G	G	G	G	G	G	G	G	G	G	G	G
Y	6971625	2 to PTT_Vaillant	C	T	C	C	C	C	C	C	C	C	C	C	C	C	C	C	C	T	C	C	C	C
Y	6972391	12 to 13	T	C	T	T	T	T	T	T	T	T	T	C	T	C	C	T	T	T	T	T	T	T
Y	6973763	4 to 12	T	C	T	T	T	T	T	T	T	T	T	C	C	C	C	T	T	T	T	T	T	T
Y	6974192	1 to 17	A	G	A	G	A	G	A	A	A	A	A	A	A	A	A	A	A	A	A	A	A	A
Y	6975145	1 to 17; 15 to 16	G	A	G	A	G	A	A	G	G	G	G	G	G	G	G	G	A	G	G	G	G	G
Y	6975175	4 to 5	A	G	A	A	G	A	A	G	G	G	G	A	A	A	A	A	A	A	G	G	G	G
Y	6975318	4 to 5	G	A	G	G	A	G	G	A	A	A	A	G	G	G	G	G	G	G	A	A	A	A
Y	6975399	4 to 5	G	A	G	G	A	G	G	A	A	A	A	G	G	G	G	G	G	G	A	A	A	A
Y	6975406	2 to PTT_Vaillant	G	A	G	G	G	G	G	G	G	G	G	G	G	G	G	G	G	A	G	G	G	G
Y	6978736	1 to 17	C	T	C	T	C	T	C	C	C	C	C	C	C	C	C	C	C	C	C	C	C	C
Y	6978928	12 to 13	C	G	C	C	C	C	C	C	C	C	C	G	C	G	G	C	C	C	C	C	C	C
Y	6978949	4 to 12	A	G	A	A	A	A	A	A	A	A	A	G	G	G	G	A	A	A	A	A	A	A
Y	6979815	2 to PTT_Vaillant	T	A	T	T	T	T	T	T	T	T	T	T	T	T	T	T	T	A	T	T	T	T
Y	6979934	4 to 5	C	T	C	C	T	C	C	T	T	T	T	C	C	C	C	C	C	C	T	T	T	T
Y	6980084	1 to 17	C	T	C	T	C	T	C	C	C	C	C	C	C	C	C	C	C	C	C	C	C	C
Y	6980114	17 to PTT_Moritz	C	G	C	C	C	G	C	C	C	C	C	C	C	C	C	C	C	C	C	C	C	C
Y	6980187	1 to 17	C	T	C	T	C	T	C	C	C	C	C	C	C	C	C	C	C	C	C	C	C	C
Y	6980293	3 to 15	T	C	T	T	T	T	C	T	T	T	T	T	T	T	T	C	C	T	T	T	T	T
Y	6980305	1 to 2	G	A	G	G	A	G	A	A	A	A	A	A	A	A	A	A	A	A	A	A	A	A
Y	6980465	1 to 2	G	A	A	A	G	A	G	G	G	G	G	G	G	G	G	G	G	G	G	G	G	G
Y	6981643	1 to 2	T	C	T	T	C	T	C	C	C	C	C	C	C	C	C	C	C	C	C	C	C	C
Y	6981794	1 to 2	G	A	G	G	A	G	A	A	A	A	A	A	A	A	A	A	A	A	A	A	A	A
Y	6981837	4 to 12	T	C	T	T	T	T	T	T	T	T	T	C	C	C	C	T	T	T	T	T	T	T
Y	6981933	1 to 2	G	A	G	G	A	G	A	A	A	A	A	A	A	A	A	A	A	A	A	A	A	A
Y	6982419	1 to 17	A	G	A	G	A	G	A	A	A	A	A	A	A	A	A	A	A	A	A	A	A	A
Y	6982479	16 to PTS_Bobby	A	G	A	A	A	A	G	A	A	A	A	A	A	A	A	A	A	A	A	A	A	A
Y	6982557	4 to 12	C	T	C	C	C	C	C	C	C	C	C	T	T	T	T	C	C	C	C	C	C	C
Y	6982642	1 to 2	T	C	T	T	C	T	C	C	C	C	C	C	C	C	C	C	C	C	C	C	C	C
Y	6982740	1 to 17	G	A	G	A	G	A	G	G	G	G	G	G	G	G	G	G	G	G	G	G	G	G
Y	6982796	2 to PTT_Vaillant	T	C	T	T	T	T	T	T	T	T	T	T	T	T	T	T	T	C	T	T	T	T
Y	6982949	12 to PTE_Basho	G	T	G	G	G	G	G	G	G	G	G	G	T	G	G	G	G	G	G	G	G	G
Y	6982962	1 to 2; 3 to 15	C	A,T	C	C	A	C	T	A	A	A	A	A	A	A	A	T	T	A	A	A	A	A
Y	6985741	1 to 2	A	C	A	A	C	A	C	C	C	C	C	C	C	C	C	C	C	C	C	C	C	C
Y	6985769	2 to PTT_Vaillant	A	G	A	A	A	A	A	A	A	A	A	A	A	A	A	A	A	G	A	A	A	A
Y	6985993	1 to 2	C	T	C	C	T	C	T	T	T	T	T	T	T	T	T	T	T	T	T	T	T	T
Y	6986881	1 to 17	T	C	T	C	T	C	T	T	T	T	T	T	T	T	T	T	T	T	T	T	T	T
Y	6987741	1 to 2	G	A	G	G	A	G	A	A	A	A	A	A	A	A	A	A	A	A	A	A	A	A
Y	6987863	1 to 2; 2 to PTT_Vaillant; 3 to 4; 3 to 15	C	T	C	C	C	C	T	C	C	C	C	C	C	C	C	T	T	T	C	C	C	C
Y	6987891	3 to 15	A	T	A	A	A	A	T	A	A	A	A	A	A	A	A	T	T	A	A	A	A	A
Y	6988184	1 to 17	C	T	C	T	C	T	C	C	C	C	C	C	C	C	C	C	C	C	C	C	C	C
Y	6988370	2 to PTT_Vaillant	T	C	T	T	T	T	T	T	T	T	T	T	T	T	T	T	T	C	T	T	T	T
Y	6988675	1 to 2	C	T	C	C	T	C	T	T	T	T	T	T	T	T	T	T	T	T	T	T	T	T
Y	6988814	12 to 13	A	G	A	A	A	A	A	A	A	A	A	G	A	G	G	A	A	A	A	A	A	A
Y	6989497	2 to PTT_Vaillant	A	G	A	A	A	A	A	A	A	A	A	A	A	A	A	A	A	G	A	A	A	A
Y	6989624	4 to 5	G	T	G	G	T	G	G	T	T	T	T	G	G	G	G	G	G	G	T	T	T	T
Y	6989931	2 to PTT_Vaillant	G	C	G	G	G	G	G	G	G	G	G	G	G	G	G	G	G	C	G	G	G	G
Y	6990099	12 to PTE_Basho	T	C	T	T	T	T	T	T	T	T	T	T	C	T	T	T	T	T	T	T	T	T
Y	6990589	1 to 17	G	A	G	A	G	A	G	G	G	G	G	G	G	G	G	G	G	G	G	G	G	G
Y	6990719	3 to 15	A	G	A	A	A	A	G	A	A	A	A	A	A	A	A	G	G	A	A	A	A	A
Y	6990799	3 to 15	G	A	G	G	G	G	A	G	G	G	G	G	G	G	G	A	A	G	G	G	G	G
Y	6991073	1 to 17	T	C	T	C	T	C	T	T	T	T	T	T	T	T	T	T	T	T	T	T	T	T
Y	6991205	4 to 12	G	A	G	G	G	G	G	G	G	G	G	A	A	A	A	G	G	G	G	G	G	G
Y	6991415	1 to 17	G	C	G	C	G	C	G	G	G	G	G	G	G	G	G	G	G	G	G	G	G	G
Y	6991578	1 to 2	C	T	C	C	T	C	T	T	T	T	T	T	T	T	T	T	T	T	T	T	T	T
Y	6992058	1 to 2	T	G	T	T	G	T	G	G	G	G	G	G	G	G	G	G	G	G	G	G	G	G
Y	6992309	2 to PTT_Vaillant	C	T	C	C	C	C	C	C	C	C	C	C	C	C	C	C	C	T	C	C	C	C
Y	6992928	1 to 17	G	C	G	C	G	C	G	G	G	G	G	G	G	G	G	G	G	G	G	G	G	G
Y	6992965	12 to 13	C	G	C	C	C	C	C	C	C	C	C	G	C	G	G	C	C	C	C	C	C	C
Y	6993347	4 to 5	A	C	C	C	A	C	C	A	A	A	A	C	C	C	C	C	C	C	A	A	A	A
Y	6993661	1 to 2	G	A	A	A	G	A	G	G	G	G	G	G	G	G	G	G	G	G	G	G	G	G
Y	6993722	3 to 15	C	T	C	C	C	C	T	C	C	C	C	C	C	C	C	T	T	C	C	C	C	C
Y	6993784	1 to 2	A	G	A	A	G	A	G	G	G	G	G	G	G	G	G	G	G	G	G	G	G	G
Y	6994253	2 to PTT_Vaillant	C	T	C	C	C	C	C	C	C	C	C	C	C	C	C	C	C	T	C	C	C	C
Y	6994567	1 to 2	G	T	G	G	T	G	T	T	T	T	T	T	T	T	T	T	T	T	T	T	T	T
Y	6994568	1 to 17	C	T	C	T	C	T	C	C	C	C	C	C	C	C	C	C	C	C	C	C	C	C
Y	6995649	9 to PTV_7	G	T	G	G	T	G	G	G	G	G	G	G	G	G	G	G	G	G	G	G	G	G
Y	6995946	17 to PTT_Moritz	A	G	A	A	A	G	A	A	A	A	A	A	A	A	A	A	A	A	A	A	A	A
Y	6995971	1 to 17	A	G	A	G	A	G	A	A	A	A	A	A	A	A	A	A	A	A	A	A	A	A
Y	6996006	12 to 13	G	C	G	G	G	G	G	G	G	G	G	C	G	C	C	G	G	G	G	G	G	G
Y	6996068	12 to PTE_Basho	G	A	G	G	G	G	G	G	G	G	G	G	A	G	G	G	G	G	G	G	G	G
Y	6996142	12 to 13	G	C	G	G	G	G	G	G	G	G	G	C	G	C	C	G	G	G	G	G	G	G
Y	6996214	4 to 5	C	T	C	C	T	C	C	T	T	T	T	C	C	C	C	C	C	C	T	T	T	T
Y	6996282	1 to 17	G	A	G	A	G	A	G	G	G	G	G	G	G	G	G	G	G	G	G	G	G	G
Y	6996414	3 to 15	G	T	G	G	G	G	T	G	G	G	G	G	G	G	G	T	T	G	G	G	G	G
Y	6996468	3 to 15	C	T	C	C	C	C	T	C	C	C	C	C	C	C	C	T	T	C	C	C	C	C
Y	6997050	12 to PTE_Basho	C	T	C	C	C	C	C	C	C	C	C	C	T	C	C	C	C	C	C	C	C	C
Y	6997053	2 to PTT_Vaillant	C	T	C	C	C	C	C	C	C	C	C	C	C	C	C	C	C	T	C	C	C	C
Y	7009998	1 to 17	C	A	C	A	C	A	C	C	C	C	C	C	C	C	C	C	C	C	C	C	C	C
Y	7010088	1 to 17	C	G	C	G	C	G	C	C	C	C	C	C	C	C	C	C	C	C	C	C	C	C
Y	7010373	4 to 12	C	T	C	C	C	C	C	C	C	C	C	T	T	T	T	C	C	C	C	C	C	C
Y	7010969	1 to 17	G	T	G	T	G	T	G	G	G	G	G	G	G	G	G	G	G	G	G	G	G	G
Y	7010975	1 to 2	A	G	A	A	G	A	G	G	G	G	G	G	G	G	G	G	G	G	G	G	G	G
Y	7011526	1 to 2	C	T	C	C	T	C	T	T	T	T	T	T	T	T	T	T	T	T	T	T	T	T
Y	7013880	4 to 5	G	A	G	G	A	G	G	A	A	A	A	G	G	G	G	G	G	G	A	A	A	A
Y	7013997	1 to 17	C	T	C	T	C	T	C	C	C	C	C	C	C	C	C	C	C	C	C	C	C	C
Y	7018009	1 to 17	T	C	T	C	T	C	T	T	T	T	T	T	T	T	T	T	T	T	T	T	T	T
Y	7018087	1 to 17	G	C	G	C	G	C	G	G	G	G	G	G	G	G	G	G	G	G	G	G	G	G
Y	7018141	2 to PTT_Vaillant	G	A	G	G	G	G	G	G	G	G	G	G	G	G	G	G	G	A	G	G	G	G
Y	7018326	2 to PTT_Vaillant	C	T	C	C	C	C	C	C	C	C	C	C	C	C	C	C	C	T	C	C	C	C
Y	7018429	1 to 17	T	C	T	C	T	C	T	T	T	T	T	T	T	T	T	T	T	T	T	T	T	T
Y	7018579	2 to PTT_Vaillant	C	G	C	C	C	C	C	C	C	C	C	C	C	C	C	C	C	G	C	C	C	C
Y	7018644	3 to 4	C	G	C	C	G	C	C	G	G	G	G	G	G	G	G	C	C	C	G	G	G	G
Y	7018815	12 to PTE_Basho	C	G	C	C	C	C	C	C	C	C	C	C	G	C	C	C	C	C	C	C	C	C
Y	7029170	1 to 17	G	T	G	T	G	T	G	G	G	G	G	G	G	G	G	G	G	G	G	G	G	G
Y	7030460	3 to 15	T	C	T	T	T	T	C	T	T	T	T	T	T	T	T	C	C	T	T	T	T	T
Y	7030484	1 to 2	T	C	C	C	T	C	T	T	T	T	T	T	T	T	T	T	T	T	T	T	T	T
Y	7030627	12 to 13	A	G	A	A	A	A	A	A	A	A	A	G	A	G	G	A	A	A	A	A	A	A
Y	7031501	1 to 17	T	C	T	C	T	C	T	T	T	T	T	T	T	T	T	T	T	T	T	T	T	T
Y	7031579	1 to 17	A	G	A	G	A	G	A	A	A	A	A	A	A	A	A	A	A	A	A	A	A	A
Y	7031806	15 to 16	G	A	G	G	G	G	A	G	G	G	G	G	G	G	G	G	A	G	G	G	G	G
Y	7031884	2 to PTT_Vaillant	G	A	G	G	G	G	G	G	G	G	G	G	G	G	G	G	G	A	G	G	G	G
Y	7033197	1 to 2	C	G	C	C	G	C	G	G	G	G	G	G	G	G	G	G	G	G	G	G	G	G
Y	7034617	4 to 5	T	A	T	T	A	T	T	A	A	A	A	T	T	T	T	T	T	T	A	A	A	A
Y	7034834	3 to 15	C	G	C	C	C	C	G	C	C	C	C	C	C	C	C	G	G	C	C	C	C	C
Y	7034868	3 to 15	C	A	C	C	C	C	A	C	C	C	C	C	C	C	C	A	A	C	C	C	C	C
Y	7035262	4 to 5	C	G	C	C	G	C	C	G	G	G	G	C	C	C	C	C	C	C	G	G	G	G
Y	7036762	1 to 2	G	A	G	G	A	G	A	A	A	A	A	A	A	A	A	A	A	A	A	A	A	A
Y	7036789	12 to PTE_Basho	T	C	T	T	T	T	T	T	T	T	T	T	C	T	T	T	T	T	T	T	T	T
Y	7036992	3 to 15	T	A	T	T	T	T	A	T	T	T	T	T	T	T	T	A	A	T	T	T	T	T
Y	7037334	2 to PTT_Vaillant	T	G	T	T	T	T	T	T	T	T	T	T	T	T	T	T	T	G	T	T	T	T
Y	7037381	3 to 15	G	T	G	G	G	G	T	G	G	G	G	G	G	G	G	T	T	G	G	G	G	G
Y	7052933	1 to 2	C	T	C	C	T	C	T	T	T	T	T	T	T	T	T	T	T	T	T	T	T	T
Y	7053311	4 to 5	G	A	G	G	A	G	G	A	A	A	A	G	G	G	G	G	G	G	A	A	A	A
Y	7053333	3 to 15	A	G	A	A	A	A	G	A	A	A	A	A	A	A	A	G	G	A	A	A	A	A
Y	7053445	3 to 15	C	T	C	C	C	C	T	C	C	C	C	C	C	C	C	T	T	C	C	C	C	C
Y	7055007	1 to 2	G	C	G	G	C	G	C	C	C	C	C	C	C	C	C	C	C	C	C	C	C	C
Y	7055056	1 to 2	G	C	G	G	C	G	C	C	C	C	C	C	C	C	C	C	C	C	C	C	C	C
Y	7055414	15 to 16	A	C	A	A	A	A	C	A	A	A	A	A	A	A	A	A	C	A	A	A	A	A
Y	7057205	1 to 17	T	A	T	A	T	A	T	T	T	T	T	T	T	T	T	T	T	T	T	T	T	T
Y	7057394	3 to 15	T	A	T	T	T	T	A	T	T	T	T	T	T	T	T	A	A	T	T	T	T	T
Y	7057423	1 to 17	A	G	A	G	A	G	A	A	A	A	A	A	A	A	A	A	A	A	A	A	A	A
Y	7057904	2 to PTT_Vaillant	G	T	G	G	G	G	G	G	G	G	G	G	G	G	G	G	G	T	G	G	G	G
Y	7064506	3 to 15	T	C	T	T	T	T	C	T	T	T	T	T	T	T	T	C	C	T	T	T	T	T
Y	7064583	1 to 2	G	T	G	G	T	G	T	T	T	T	T	T	T	T	T	T	T	T	T	T	T	T
Y	7064713	3 to 15	G	A	G	G	G	G	A	G	G	G	G	G	G	G	G	A	A	G	G	G	G	G
Y	7064790	2 to PTT_Vaillant	C	T	C	C	C	C	C	C	C	C	C	C	C	C	C	C	C	T	C	C	C	C
Y	7064949	1 to 2	T	G	T	T	G	T	G	G	G	G	G	G	G	G	G	G	G	G	G	G	G	G
Y	7064964	4 to 5	G	A	G	G	A	G	G	A	A	A	A	G	G	G	G	G	G	G	A	A	A	A
Y	7072736	1 to 2	T	C	T	T	C	T	C	C	C	C	C	C	C	C	C	C	C	C	C	C	C	C
Y	7072740	4 to 5	C	G	C	C	G	C	C	G	G	G	G	C	C	C	C	C	C	C	G	G	G	G
Y	7072777	5 to 10	C	T	C	C	C	C	C	C	T	C	T	C	C	C	C	C	C	C	C	T	C	C
Y	7073292	4 to 5	G	A	G	G	A	G	G	A	A	A	A	G	G	G	G	G	G	G	A	A	A	A
Y	7073749	7 to 8	C	T	C	C	T	C	C	T	C	C	C	C	C	C	C	C	C	C	C	C	T	C
Y	7074249	12 to PTE_Basho	C	A	C	C	C	C	C	C	C	C	C	C	A	C	C	C	C	C	C	C	C	C
Y	7074296	4 to 5	A	G	A	A	G	A	A	G	G	G	G	A	A	A	A	A	A	A	G	G	G	G
Y	7074470	1 to 17	G	A	G	A	G	A	G	G	G	G	G	G	G	G	G	G	G	G	G	G	G	G
Y	7074562	2 to PTT_Vaillant	T	A	T	T	T	T	T	T	T	T	T	T	T	T	T	T	T	A	T	T	T	T
Y	7074563	2 to PTT_Vaillant	A	G	A	A	A	A	A	A	A	A	A	A	A	A	A	A	A	G	A	A	A	A
Y	7075039	1 to 17	T	A	T	A	T	A	T	T	T	T	T	T	T	T	T	T	T	T	T	T	T	T
Y	7075047	1 to 2	G	A	G	G	A	G	A	A	A	A	A	A	A	A	A	A	A	A	A	A	A	A
Y	7075194	1 to 17	A	G	A	G	A	G	A	A	A	A	A	A	A	A	A	A	A	A	A	A	A	A
Y	7075555	1 to 17	G	A	G	A	G	A	G	G	G	G	G	G	G	G	G	G	G	G	G	G	G	G
Y	7077009	3 to 15	G	A	G	G	G	G	A	G	G	G	G	G	G	G	G	A	A	G	G	G	G	G
Y	7077110	1 to 17	A	T	A	T	A	T	A	A	A	A	A	A	A	A	A	A	A	A	A	A	A	A
Y	7077227	4 to 12	A	G	A	A	A	A	A	A	A	A	A	G	G	G	G	A	A	A	A	A	A	A
Y	7077311	2 to 3	C	T	C	C	T	C	T	T	T	T	T	T	T	T	T	T	T	C	T	T	T	T
Y	7077963	1 to 2	G	A	G	G	A	G	A	A	A	A	A	A	A	A	A	A	A	A	A	A	A	A
Y	7078032	3 to 4	C	T	C	C	T	C	C	T	T	T	T	T	T	T	T	C	C	C	T	T	T	T
Y	7078313	4 to 12	G	C	G	G	G	G	G	G	G	G	G	C	C	C	C	G	G	G	G	G	G	G
Y	7078323	4 to 5	G	A	G	G	A	G	G	A	A	A	A	G	G	G	G	G	G	G	A	A	A	A
Y	7079887	1 to 17	C	T	C	T	C	T	C	C	C	C	C	C	C	C	C	C	C	C	C	C	C	C
Y	7079979	12 to PTE_Basho	G	A	G	G	G	G	G	G	G	G	G	G	A	G	G	G	G	G	G	G	G	G
Y	7080494	4 to 5	G	A	G	G	A	G	G	A	A	A	A	G	G	G	G	G	G	G	A	A	A	A
Y	7081059	12 to PTE_Basho	C	T	C	C	C	C	C	C	C	C	C	C	T	C	C	C	C	C	C	C	C	C
Y	7081082	1 to 17	G	A	G	A	G	A	G	G	G	G	G	G	G	G	G	G	G	G	G	G	G	G
Y	7081177	15 to PTS_Vincent	G	A	G	G	G	G	G	G	G	G	G	G	G	G	G	A	G	G	G	G	G	G
Y	7081200	1 to 17	T	C	T	C	T	C	T	T	T	T	T	T	T	T	T	T	T	T	T	T	T	T
Y	7082252	2 to PTT_Vaillant	G	A	G	G	G	G	G	G	G	G	G	G	G	G	G	G	G	A	G	G	G	G
Y	7082540	3 to 4	T	A	T	T	A	T	T	A	A	A	A	A	A	A	A	T	T	T	A	A	A	A
Y	7082628	1 to 17	C	T	C	T	C	T	C	C	C	C	C	C	C	C	C	C	C	C	C	C	C	C
Y	7082762	1 to 17	T	C	C	T	C	T	C	C	C	C	C	C	C	C	C	C	C	C	C	C	C	C
Y	7083045	11 to PTV_Buttons	C	A	C	C	C	C	C	C	A	C	C	C	C	C	C	C	C	C	C	C	C	C
Y	7083414	4 to 5	C	A	C	C	A	C	C	A	A	A	A	C	C	C	C	C	C	C	A	A	A	A
Y	7083437	1 to 17	T	A	T	A	T	A	T	T	T	T	T	T	T	T	T	T	T	T	T	T	T	T
Y	7083787	3 to 15	C	T	C	C	C	C	T	C	C	C	C	C	C	C	C	T	T	C	C	C	C	C
Y	7085263	4 to 5	G	T	G	G	T	G	G	T	T	T	T	G	G	G	G	G	G	G	T	T	T	T
Y	7085451	4 to 5	C	T	C	C	T	C	C	T	T	T	T	C	C	C	C	C	C	C	T	T	T	T
Y	7085488	1 to 17	A	C	A	C	A	C	A	A	A	A	A	A	A	A	A	A	A	A	A	A	A	A
Y	7085500	1 to 17	C	T	C	T	C	T	C	C	C	C	C	C	C	C	C	C	C	C	C	C	C	C
Y	7087138	1 to 17	C	T	C	T	C	T	C	C	C	C	C	C	C	C	C	C	C	C	C	C	C	C
Y	7087195	3 to 4	C	T	C	C	T	C	C	T	T	T	T	T	T	T	T	C	C	C	T	T	T	T
Y	7087329	1 to 17	G	A	G	A	G	A	G	G	G	G	G	G	G	G	G	G	G	G	G	G	G	G
Y	7087433	3 to 15	G	T	G	G	G	G	T	G	G	G	G	G	G	G	G	T	T	G	G	G	G	G
Y	7087557	1 to 17	T	G	T	G	T	G	T	T	T	T	T	T	T	T	T	T	T	T	T	T	T	T
Y	7087603	1 to 17	G	A	G	A	G	A	G	G	G	G	G	G	G	G	G	G	G	G	G	G	G	G
Y	7087635	2 to PTT_Vaillant	C	T	C	C	C	C	C	C	C	C	C	C	C	C	C	C	C	T	C	C	C	C
Y	7089983	1 to 2	A	G	A	A	G	A	G	G	G	G	G	G	G	G	G	G	G	G	G	G	G	G
Y	7090369	1 to 17	C	G	C	G	C	G	C	C	C	C	C	C	C	C	C	C	C	C	C	C	C	C
Y	7090417	3 to 15	T	A	T	T	T	T	A	T	T	T	T	T	T	T	T	A	A	T	T	T	T	T
Y	7090494	2 to 3	T	C	T	T	C	T	C	C	C	C	C	C	C	C	C	C	C	T	C	C	C	C
Y	7090680	1 to 17	A	G	A	G	A	G	A	A	A	A	A	A	A	A	A	A	A	A	A	A	A	A
Y	7091089	3 to 4	T	C	T	T	C	T	T	C	C	C	C	C	C	C	C	T	T	T	C	C	C	C
Y	7092041	3 to 4	C	T	C	C	T	C	C	T	T	T	T	T	T	T	T	C	C	C	T	T	T	T
Y	7093032	1 to 17	C	T	C	T	C	T	C	C	C	C	C	C	C	C	C	C	C	C	C	C	C	C
Y	7093061	1 to 2	C	G	C	C	G	C	G	G	G	G	G	G	G	G	G	G	G	G	G	G	G	G
Y	7093088	1 to 17	G	A	A	G	A	G	A	A	A	A	A	A	A	A	A	A	A	A	A	A	A	A
Y	7093169	1 to 17	G	T	G	T	G	T	G	G	G	G	G	G	G	G	G	G	G	G	G	G	G	G
Y	7094133	1 to 17	G	A	G	A	G	A	G	G	G	G	G	G	G	G	G	G	G	G	G	G	G	G
Y	7094134	1 to 17	C	T	C	T	C	T	C	C	C	C	C	C	C	C	C	C	C	C	C	C	C	C
Y	7094169	4 to 12	T	C	T	T	T	T	T	T	T	T	T	C	C	C	C	T	T	T	T	T	T	T
Y	7094406	1 to 2	T	C	T	T	C	T	C	C	C	C	C	C	C	C	C	C	C	C	C	C	C	C
Y	7095472	1 to 17	C	G	C	G	C	G	C	C	C	C	C	C	C	C	C	C	C	C	C	C	C	C
Y	7096158	1 to 17	G	T	G	T	G	T	G	G	G	G	G	G	G	G	G	G	G	G	G	G	G	G
Y	7101482	3 to 15	C	G	C	C	C	C	G	C	C	C	C	C	C	C	C	G	G	C	C	C	C	C
Y	7103917	1 to 17	C	T	C	T	C	T	C	C	C	C	C	C	C	C	C	C	C	C	C	C	C	C
Y	7104791	3 to 15	G	A	G	G	G	G	A	G	G	G	G	G	G	G	G	A	A	G	G	G	G	G
Y	7105117	1 to 2	T	G	T	T	G	T	G	G	G	G	G	G	G	G	G	G	G	G	G	G	G	G
Y	7105237	15 to 16	G	A	G	G	G	G	A	G	G	G	G	G	G	G	G	G	A	G	G	G	G	G
Y	7105372	1 to 17	C	T	C	T	C	T	C	C	C	C	C	C	C	C	C	C	C	C	C	C	C	C
Y	7105500	12 to PTE_Basho	G	T	G	G	G	G	G	G	G	G	G	G	T	G	G	G	G	G	G	G	G	G
Y	7106069	3 to 15	G	A	G	G	G	G	A	G	G	G	G	G	G	G	G	A	A	G	G	G	G	G
Y	7106490	10 to PTV_Koby	C	G	C	C	C	C	C	C	C	C	C	C	C	C	C	C	C	C	C	G	C	C
Y	7106527	2 to PTT_Vaillant	A	G	A	A	A	A	A	A	A	A	A	A	A	A	A	A	A	G	A	A	A	A
Y	7106575	1 to 2	C	T	C	C	T	C	T	T	T	T	T	T	T	T	T	T	T	T	T	T	T	T
Y	7108168	1 to 17	C	T	T	C	T	C	T	T	T	T	T	T	T	T	T	T	T	T	T	T	T	T
Y	7108293	1 to 17	G	A	G	A	G	A	G	G	G	G	G	G	G	G	G	G	G	G	G	G	G	G
Y	7108389	1 to 17	G	C	G	C	G	C	G	G	G	G	G	G	G	G	G	G	G	G	G	G	G	G
Y	7109329	3 to 15	A	G	A	A	A	A	G	A	A	A	A	A	A	A	A	G	G	A	A	A	A	A
Y	7109626	1 to 2	G	A	G	G	A	G	A	A	A	A	A	A	A	A	A	A	A	A	A	A	A	A
Y	7109940	1 to 2	T	C	T	T	C	T	C	C	C	C	C	C	C	C	C	C	C	C	C	C	C	C
Y	7110146	1 to 17	A	G	A	G	A	G	A	A	A	A	A	A	A	A	A	A	A	A	A	A	A	A
Y	7110316	1 to 17	G	A	G	A	G	A	G	G	G	G	G	G	G	G	G	G	G	G	G	G	G	G
Y	7116701	1 to 17	G	A	G	A	G	A	G	G	G	G	G	G	G	G	G	G	G	G	G	G	G	G
Y	7116714	3 to 15	T	A	T	T	T	T	A	T	T	T	T	T	T	T	T	A	A	T	T	T	T	T
Y	7117271	1 to 17	G	T	G	T	G	T	G	G	G	G	G	G	G	G	G	G	G	G	G	G	G	G
Y	7117421	1 to 17	C	A	C	A	C	A	C	C	C	C	C	C	C	C	C	C	C	C	C	C	C	C
Y	7117547	1 to 17	A	G	A	G	A	G	A	A	A	A	A	A	A	A	A	A	A	A	A	A	A	A
Y	7117550	1 to 17	G	A	G	A	G	A	G	G	G	G	G	G	G	G	G	G	G	G	G	G	G	G
Y	7130312	3 to 15	C	A	C	C	C	C	A	C	C	C	C	C	C	C	C	A	A	C	C	C	C	C
Y	7130582	1 to 17	C	T	C	T	C	T	C	C	C	C	C	C	C	C	C	C	C	C	C	C	C	C
Y	7130660	1 to 2	C	T	T	T	C	T	C	C	C	C	C	C	C	C	C	C	C	C	C	C	C	C
Y	7130702	1 to 17	T	C	T	C	T	C	T	T	T	T	T	T	T	T	T	T	T	T	T	T	T	T
Y	7130854	1 to 17	G	A	A	G	A	G	A	A	A	A	A	A	A	A	A	A	A	A	A	A	A	A
Y	7130963	7 to 8	G	C	G	G	C	G	G	C	G	G	G	G	G	G	G	G	G	G	G	G	C	G
Y	7130997	4 to 12	G	C	G	G	G	G	G	G	G	G	G	C	C	C	C	G	G	G	G	G	G	G
Y	7131031	1 to 17	G	A	A	G	A	G	A	A	A	A	A	A	A	A	A	A	A	A	A	A	A	A
Y	7133050	1 to 17	C	T	C	T	C	T	C	C	C	C	C	C	C	C	C	C	C	C	C	C	C	C
Y	7133212	4 to 5	A	G	A	A	G	A	A	G	G	G	G	A	A	A	A	A	A	A	G	G	G	G
Y	7134385	16 to PTS_Bobby	C	G	C	C	C	C	G	C	C	C	C	C	C	C	C	C	C	C	C	C	C	C
Y	7134428	3 to 4	A	C	A	A	C	A	A	C	C	C	C	C	C	C	C	A	A	A	C	C	C	C
Y	7134551	2 to PTT_Vaillant	C	T	C	C	C	C	C	C	C	C	C	C	C	C	C	C	C	T	C	C	C	C
Y	7134763	2 to PTT_Vaillant	G	A	G	G	G	G	G	G	G	G	G	G	G	G	G	G	G	A	G	G	G	G
Y	7136347	1 to 17	A	G	A	G	A	G	A	A	A	A	A	A	A	A	A	A	A	A	A	A	A	A
Y	7136734	1 to 17	C	G	C	G	C	G	C	C	C	C	C	C	C	C	C	C	C	C	C	C	C	C
Y	7138433	1 to 17	T	C	T	C	T	C	T	T	T	T	T	T	T	T	T	T	T	T	T	T	T	T
Y	7138892	1 to 17	A	G	A	G	A	G	A	A	A	A	A	A	A	A	A	A	A	A	A	A	A	A
Y	7138893	15 to PTS_Vincent	C	T	C	C	C	C	C	C	C	C	C	C	C	C	C	T	C	C	C	C	C	C
Y	7140084	1 to 2	G	C	G	G	C	G	C	C	C	C	C	C	C	C	C	C	C	C	C	C	C	C
Y	7140218	4 to 5	C	T	C	C	T	C	C	T	T	T	T	C	C	C	C	C	C	C	T	T	T	T
Y	7141308	4 to 5	T	A	T	T	A	T	T	A	A	A	A	T	T	T	T	T	T	T	A	A	A	A
Y	7143209	1 to 2	T	C	T	T	C	T	C	C	C	C	C	C	C	C	C	C	C	C	C	C	C	C
Y	7143789	3 to 15	C	T	C	C	C	C	T	C	C	C	C	C	C	C	C	T	T	C	C	C	C	C
Y	7144525	2 to PTT_Vaillant	A	G	A	A	A	A	A	A	A	A	A	A	A	A	A	A	A	G	A	A	A	A
Y	7145033	1 to 2	T	C	T	T	C	T	C	C	C	C	C	C	C	C	C	C	C	C	C	C	C	C
Y	7145326	3 to 15	A	C	A	A	A	A	C	A	A	A	A	A	A	A	A	C	C	A	A	A	A	A
Y	7147407	1 to ancestral; 3 to 15	T	C	T	C	C	C	T	C	C	C	C	C	C	C	C	T	T	C	C	C	C	C
Y	7147454	12 to 13	A	G	A	A	A	A	A	A	A	A	A	G	A	G	G	A	A	A	A	A	A	A
Y	7147469	11 to PTV_8	G	C	G	G	G	G	G	G	G	G	C	G	G	G	G	G	G	G	G	G	G	G
Y	7149886	1 to 17	G	A	A	G	A	G	A	A	A	A	A	A	A	A	A	A	A	A	A	A	A	A
Y	7150305	4 to 12	C	G	C	C	C	C	C	C	C	C	C	G	G	G	G	C	C	C	C	C	C	C
Y	7151019	1 to 17	A	T	A	T	A	T	A	A	A	A	A	A	A	A	A	A	A	A	A	A	A	A
Y	7151227	4 to 12	A	C	A	A	A	A	A	A	A	A	A	C	C	C	C	A	A	A	A	A	A	A
Y	7151256	1 to 17; 4 to 12	G	A	G	A	G	A	G	G	G	G	G	A	A	A	A	G	G	G	G	G	G	G
Y	7151471	1 to 17	A	G	A	G	A	G	A	A	A	A	A	A	A	A	A	A	A	A	A	A	A	A
Y	7151950	2 to PTT_Vaillant	C	G	C	C	C	C	C	C	C	C	C	C	C	C	C	C	C	G	C	C	C	C
Y	7151991	1 to 2	G	C	G	G	C	G	C	C	C	C	C	C	C	C	C	C	C	C	C	C	C	C
Y	7152604	2 to PTT_Vaillant	G	A	G	G	G	G	G	G	G	G	G	G	G	G	G	G	G	A	G	G	G	G
Y	7153225	1 to 2	A	T	A	A	T	A	T	T	T	T	T	T	T	T	T	T	T	T	T	T	T	T
Y	7153257	3 to 15	C	T	C	C	C	C	T	C	C	C	C	C	C	C	C	T	T	C	C	C	C	C
Y	7153325	1 to 17	T	C	T	C	T	C	T	T	T	T	T	T	T	T	T	T	T	T	T	T	T	T
Y	7153746	1 to 17	G	A	G	A	G	A	G	G	G	G	G	G	G	G	G	G	G	G	G	G	G	G
Y	7156700	15 to 16	C	T	C	C	C	C	T	C	C	C	C	C	C	C	C	C	T	C	C	C	C	C
Y	7156847	2 to PTT_Vaillant	T	C	T	T	T	T	T	T	T	T	T	T	T	T	T	T	T	C	T	T	T	T
Y	7157931	3 to 15	C	T	C	C	C	C	T	C	C	C	C	C	C	C	C	T	T	C	C	C	C	C
Y	7158050	1 to 2	A	G	A	A	G	A	G	G	G	G	G	G	G	G	G	G	G	G	G	G	G	G
Y	7159675	1 to 17	C	G	C	G	C	G	C	C	C	C	C	C	C	C	C	C	C	C	C	C	C	C
Y	7160343	1 to 17	T	A	T	A	T	A	T	T	T	T	T	T	T	T	T	T	T	T	T	T	T	T
Y	7161428	4 to 12	C	A	C	C	C	C	C	C	C	C	C	A	A	A	A	C	C	C	C	C	C	C
Y	7161465	12 to PTE_Basho	T	C	T	T	T	T	T	T	T	T	T	T	C	T	T	T	T	T	T	T	T	T
Y	7161630	3 to 15	C	T	C	C	C	C	T	C	C	C	C	C	C	C	C	T	T	C	C	C	C	C
Y	7162483	4 to 5	A	T	A	A	T	A	A	T	T	T	T	A	A	A	A	A	A	A	T	T	T	T
Y	7162496	1 to 2	T	G	T	T	G	T	G	G	G	G	G	G	G	G	G	G	G	G	G	G	G	G
Y	7162818	1 to 2	C	T	C	C	T	C	T	T	T	T	T	T	T	T	T	T	T	T	T	T	T	T
Y	7162977	1 to 17	C	G	C	G	C	G	C	C	C	C	C	C	C	C	C	C	C	C	C	C	C	C
Y	7162982	1 to 2	T	C	C	C	T	C	T	T	T	T	T	T	T	T	T	T	T	T	T	T	T	T
Y	7162987	1 to 17	A	G	A	G	A	G	A	A	A	A	A	A	A	A	A	A	A	A	A	A	A	A
Y	7163384	1 to 17	C	A	C	A	C	A	C	C	C	C	C	C	C	C	C	C	C	C	C	C	C	C
Y	7165195	1 to 17	T	C	T	C	T	C	T	T	T	T	T	T	T	T	T	T	T	T	T	T	T	T
Y	7167928	3 to 15	C	T	C	C	C	C	T	C	C	C	C	C	C	C	C	T	T	C	C	C	C	C
Y	7168993	3 to 15	G	A	G	G	G	G	A	G	G	G	G	G	G	G	G	A	A	G	G	G	G	G
Y	7169092	1 to 17	G	A	G	A	G	A	G	G	G	G	G	G	G	G	G	G	G	G	G	G	G	G
Y	7169119	4 to 12	T	A	T	T	T	T	T	T	T	T	T	A	A	A	A	T	T	T	T	T	T	T
Y	7169152	1 to 17	A	G	A	G	A	G	A	A	A	A	A	A	A	A	A	A	A	A	A	A	A	A
Y	7169244	2 to PTT_Vaillant	T	A	T	T	T	T	T	T	T	T	T	T	T	T	T	T	T	A	T	T	T	T
Y	7170949	4 to 5	G	T	G	G	T	G	G	T	T	T	T	G	G	G	G	G	G	G	T	T	T	T
Y	7171603	12 to PTE_Basho	T	C	T	T	T	T	T	T	T	T	T	T	C	T	T	T	T	T	T	T	T	T
Y	7173010	1 to 17	C	G	C	G	C	G	C	C	C	C	C	C	C	C	C	C	C	C	C	C	C	C
Y	7173266	1 to 17	C	A	C	A	C	A	C	C	C	C	C	C	C	C	C	C	C	C	C	C	C	C
Y	7173802	3 to 15	G	A	G	G	G	G	A	G	G	G	G	G	G	G	G	A	A	G	G	G	G	G
Y	7176460	4 to 5	G	C	G	G	C	G	G	C	C	C	C	G	G	G	G	G	G	G	C	C	C	C
Y	7176692	4 to 5	T	G	T	T	G	T	T	G	G	G	G	T	T	T	T	T	T	T	G	G	G	G
Y	7176695	1 to 2	C	T	C	C	T	C	T	T	T	T	T	T	T	T	T	T	T	T	T	T	T	T
Y	7177694	1 to 2	G	C	G	G	C	G	C	C	C	C	C	C	C	C	C	C	C	C	C	C	C	C
Y	7177718	12 to PTE_Basho	C	T	C	C	C	C	C	C	C	C	C	C	T	C	C	C	C	C	C	C	C	C
Y	7178065	16 to PTS_Bobby	C	T	C	C	C	C	T	C	C	C	C	C	C	C	C	C	C	C	C	C	C	C
Y	7178249	1 to 17	C	T	C	T	C	T	C	C	C	C	C	C	C	C	C	C	C	C	C	C	C	C
Y	7178371	2 to PTT_Vaillant	C	T	C	C	C	C	C	C	C	C	C	C	C	C	C	C	C	T	C	C	C	C
Y	7178460	2 to PTT_Vaillant	G	C	G	G	G	G	G	G	G	G	G	G	G	G	G	G	G	C	G	G	G	G
Y	7178513	1 to 17	T	C	T	C	T	C	T	T	T	T	T	T	T	T	T	T	T	T	T	T	T	T
Y	7178887	6 to PTV_Bosco	C	T	C	C	C	C	C	C	C	C	C	C	C	C	C	C	C	C	T	C	C	C
Y	7179001	1 to 2	A	G	A	A	G	A	G	G	G	G	G	G	G	G	G	G	G	G	G	G	G	G
Y	7180298	2 to PTT_Vaillant	G	A	G	G	G	G	G	G	G	G	G	G	G	G	G	G	G	A	G	G	G	G
Y	7180308	4 to 12	A	T	A	A	A	A	A	A	A	A	A	T	T	T	T	A	A	A	A	A	A	A
Y	7180500	2 to PTT_Vaillant	C	T	C	C	C	C	C	C	C	C	C	C	C	C	C	C	C	T	C	C	C	C
Y	7181484	2 to PTT_Vaillant	A	G	A	A	A	A	A	A	A	A	A	A	A	A	A	A	A	G	A	A	A	A
Y	7184060	3 to 15	G	A	G	G	G	G	A	G	G	G	G	G	G	G	G	A	A	G	G	G	G	G
Y	7184199	1 to 17	G	A	G	A	G	A	G	G	G	G	G	G	G	G	G	G	G	G	G	G	G	G
Y	7184449	1 to 17	C	T	C	T	C	T	C	C	C	C	C	C	C	C	C	C	C	C	C	C	C	C
Y	7184489	1 to 17	G	C	G	C	G	C	G	G	G	G	G	G	G	G	G	G	G	G	G	G	G	G
Y	7184699	1 to 17	C	T	C	T	C	T	C	C	C	C	C	C	C	C	C	C	C	C	C	C	C	C
Y	7186120	1 to 17; 2 to PTT_Vaillant	A	C,G	A	C	A	C	A	A	A	A	A	A	A	A	A	A	A	G	A	A	A	A
Y	7186368	3 to 15	A	C	A	A	A	A	C	A	A	A	A	A	A	A	A	C	C	A	A	A	A	A
Y	7186744	1 to 17	A	G	A	G	A	G	A	A	A	A	A	A	A	A	A	A	A	A	A	A	A	A
Y	7186863	1 to 17	C	G	C	G	C	G	C	C	C	C	C	C	C	C	C	C	C	C	C	C	C	C
Y	7188438	1 to 17	T	C	T	C	T	C	T	T	T	T	T	T	T	T	T	T	T	T	T	T	T	T
Y	7188516	15 to PTS_Vincent	T	A	T	T	T	T	T	T	T	T	T	T	T	T	T	A	T	T	T	T	T	T
Y	7188777	1 to 17	T	G	T	G	T	G	T	T	T	T	T	T	T	T	T	T	T	T	T	T	T	T
Y	7188820	4 to 5	T	G	T	T	G	T	T	G	G	G	G	T	T	T	T	T	T	T	G	G	G	G
Y	7189300	1 to 2	G	A	A	A	G	A	G	G	G	G	G	G	G	G	G	G	G	G	G	G	G	G
Y	7189359	1 to 17	G	A	G	A	G	A	G	G	G	G	G	G	G	G	G	G	G	G	G	G	G	G
Y	7189604	3 to 15	T	C	T	T	T	T	C	T	T	T	T	T	T	T	T	C	C	T	T	T	T	T
Y	7189714	1 to 2	T	A	T	T	A	T	A	A	A	A	A	A	A	A	A	A	A	A	A	A	A	A
Y	7189794	11 to PTV_8	G	A	G	G	G	G	G	G	G	G	A	G	G	G	G	G	G	G	G	G	G	G
Y	7190345	1 to 17	T	G	T	G	T	G	T	T	T	T	T	T	T	T	T	T	T	T	T	T	T	T
Y	7190437	4 to 5	C	G	C	C	G	C	C	G	G	G	G	C	C	C	C	C	C	C	G	G	G	G
Y	7190742	1 to 2	C	T	T	T	C	T	C	C	C	C	C	C	C	C	C	C	C	C	C	C	C	C
Y	7191370	1 to 17	A	C	A	C	A	C	A	A	A	A	A	A	A	A	A	A	A	A	A	A	A	A
Y	7191444	4 to 5	G	C	G	G	C	G	G	C	C	C	C	G	G	G	G	G	G	G	C	C	C	C
Y	7191717	4 to 12	A	G	A	A	A	A	A	A	A	A	A	G	G	G	G	A	A	A	A	A	A	A
Y	7192824	1 to 17	C	A	C	A	C	A	C	C	C	C	C	C	C	C	C	C	C	C	C	C	C	C
Y	7192893	4 to 5	A	G	A	A	G	A	A	G	G	G	G	A	A	A	A	A	A	A	G	G	G	G
Y	7193282	3 to 15	T	G	T	T	T	T	G	T	T	T	T	T	T	T	T	G	G	T	T	T	T	T
Y	7193283	3 to 15	A	G	A	A	A	A	G	A	A	A	A	A	A	A	A	G	G	A	A	A	A	A
Y	7193441	1 to 17	C	T	C	T	C	T	C	C	C	C	C	C	C	C	C	C	C	C	C	C	C	C
Y	7193640	1 to 17	C	A	C	A	C	A	C	C	C	C	C	C	C	C	C	C	C	C	C	C	C	C
Y	7194391	1 to 17	C	T	C	T	C	T	C	C	C	C	C	C	C	C	C	C	C	C	C	C	C	C
Y	7194400	3 to 15	G	A	G	G	G	G	A	G	G	G	G	G	G	G	G	A	A	G	G	G	G	G
Y	7194708	15 to PTS_Vincent	G	A	G	G	G	G	G	G	G	G	G	G	G	G	G	A	G	G	G	G	G	G
Y	7194734	1 to 2	G	A	G	G	A	G	A	A	A	A	A	A	A	A	A	A	A	A	A	A	A	A
Y	7195017	1 to 17	A	G	A	G	A	G	A	A	A	A	A	A	A	A	A	A	A	A	A	A	A	A
Y	7196575	2 to PTT_Vaillant	C	G	C	C	C	C	C	C	C	C	C	C	C	C	C	C	C	G	C	C	C	C
Y	7196722	2 to 3	A	C	A	A	C	A	C	C	C	C	C	C	C	C	C	C	C	A	C	C	C	C
Y	7196802	12 to 13	A	C	A	A	A	A	A	A	A	A	A	C	A	C	C	A	A	A	A	A	A	A
Y	7198069	1 to 17	G	A	G	A	G	A	G	G	G	G	G	G	G	G	G	G	G	G	G	G	G	G
Y	7198187	3 to 15	A	G	A	A	A	A	G	A	A	A	A	A	A	A	A	G	G	A	A	A	A	A
Y	7199746	3 to 4	G	A	G	G	A	G	G	A	A	A	A	A	A	A	A	G	G	G	A	A	A	A
Y	7200908	2 to PTT_Vaillant	C	G	C	C	C	C	C	C	C	C	C	C	C	C	C	C	C	G	C	C	C	C
Y	7201111	12 to PTE_Basho	C	T	C	C	C	C	C	C	C	C	C	C	T	C	C	C	C	C	C	C	C	C
Y	7201328	1 to 17	T	A	T	A	T	A	T	T	T	T	T	T	T	T	T	T	T	T	T	T	T	T
Y	7202016	1 to 17	C	A	C	A	C	A	C	C	C	C	C	C	C	C	C	C	C	C	C	C	C	C
Y	7202207	1 to 2	C	T	C	C	T	C	T	T	T	T	T	T	T	T	T	T	T	T	T	T	T	T
Y	7202243	1 to 2	G	A	G	G	A	G	A	A	A	A	A	A	A	A	A	A	A	A	A	A	A	A
Y	7202288	15 to PTS_Vincent	T	C	T	T	T	T	T	T	T	T	T	T	T	T	T	C	T	T	T	T	T	T
Y	7204148	4 to 5	A	C,G	G	G	C	G	G	C	C	C	C	G	G	G	G	G	G	G	C	C	C	C
Y	7204193	1 to 17	C	T	C	T	C	T	C	C	C	C	C	C	C	C	C	C	C	C	C	C	C	C
Y	7204572	2 to PTT_Vaillant	G	A	G	G	G	G	G	G	G	G	G	G	G	G	G	G	G	A	G	G	G	G
Y	7206000	12 to 13	T	G	T	T	T	T	T	T	T	T	T	G	T	G	G	T	T	T	T	T	T	T
Y	7206154	1 to 17	C	T	T	C	T	C	T	T	T	T	T	T	T	T	T	T	T	T	T	T	T	T
Y	7206921	1 to 17	A	G	A	G	A	G	A	A	A	A	A	A	A	A	A	A	A	A	A	A	A	A
Y	7207606	1 to 2	A	C	A	A	C	A	C	C	C	C	C	C	C	C	C	C	C	C	C	C	C	C
Y	7207716	4 to 12	A	G,C	G	G	G	G	G	G	G	G	G	C	C	C	C	G	G	G	G	G	G	G
Y	7207869	3 to 15	C	G	C	C	C	C	G	C	C	C	C	C	C	C	C	G	G	C	C	C	C	C
Y	7207957	12 to PTE_Basho	G	A	G	G	G	G	G	G	G	G	G	G	A	G	G	G	G	G	G	G	G	G
Y	7208210	2 to PTT_Vaillant	G	A	G	G	G	G	G	G	G	G	G	G	G	G	G	G	G	A	G	G	G	G
Y	7208301	1 to 2	C	T	T	T	C	T	C	C	C	C	C	C	C	C	C	C	C	C	C	C	C	C
Y	7210687	1 to 17	G	A	G	A	G	A	G	G	G	G	G	G	G	G	G	G	G	G	G	G	G	G
Y	7211609	2 to PTT_Vaillant	A	G	A	A	A	A	A	A	A	A	A	A	A	A	A	A	A	G	A	A	A	A
Y	7211676	12 to 13	C	T	C	C	C	C	C	C	C	C	C	T	C	T	T	C	C	C	C	C	C	C
Y	7211814	1 to 17	A	C	A	C	A	C	A	A	A	A	A	A	A	A	A	A	A	A	A	A	A	A
Y	7211823	16 to PTS_Bwambale	C	G	C	C	C	C	C	C	C	C	C	C	C	C	C	C	G	C	C	C	C	C
Y	7211873	1 to 17	C	T	C	T	C	T	C	C	C	C	C	C	C	C	C	C	C	C	C	C	C	C
Y	7213710	16 to PTS_Bwambale	G	A	G	G	G	G	G	G	G	G	G	G	G	G	G	G	A	G	G	G	G	G
Y	7213786	2 to PTT_Vaillant	T	C	T	T	T	T	T	T	T	T	T	T	T	T	T	T	T	C	T	T	T	T
Y	7214039	15 to 16	C	T	C	C	C	C	T	C	C	C	C	C	C	C	C	C	T	C	C	C	C	C
Y	7216815	1 to 2	C	T	C	C	T	C	T	T	T	T	T	T	T	T	T	T	T	T	T	T	T	T
Y	7216885	1 to 17	A	G	A	G	A	G	A	A	A	A	A	A	A	A	A	A	A	A	A	A	A	A
Y	7217106	13 to PTE_Damian	T	A	T	T	T	T	T	T	T	T	T	T	T	A	T	T	T	T	T	T	T	T
Y	7217263	4 to 12	C	T	C	C	C	C	C	C	C	C	C	T	T	T	T	C	C	C	C	C	C	C
Y	7221413	1 to 2	G	A	G	G	A	G	A	A	A	A	A	A	A	A	A	A	A	A	A	A	A	A
Y	7224625	2 to PTT_Vaillant	C	G,A	G	G	G	G	G	G	G	G	G	G	G	G	G	G	G	A	G	G	G	G
Y	7225924	2 to PTT_Vaillant	G	C	G	G	G	G	G	G	G	G	G	G	G	G	G	G	G	C	G	G	G	G
Y	7226565	1 to 2	C	T	C	C	T	C	T	T	T	T	T	T	T	T	T	T	T	T	T	T	T	T
Y	7226955	1 to 17	C	T	C	T	C	T	C	C	C	C	C	C	C	C	C	C	C	C	C	C	C	C
Y	7227366	1 to 2	G	A	G	G	A	G	A	A	A	A	A	A	A	A	A	A	A	A	A	A	A	A
Y	7227380	1 to 2	T	G	T	T	G	T	G	G	G	G	G	G	G	G	G	G	G	G	G	G	G	G
Y	7227981	2 to PTT_Vaillant	G	A	G	G	G	G	G	G	G	G	G	G	G	G	G	G	G	A	G	G	G	G
Y	7228003	12 to PTE_Basho	C	T	C	C	C	C	C	C	C	C	C	C	T	C	C	C	C	C	C	C	C	C
Y	7228027	3 to 15	T	C	T	T	T	T	C	T	T	T	T	T	T	T	T	C	C	T	T	T	T	T
Y	7228265	1 to 2	A	G	A	A	G	A	G	G	G	G	G	G	G	G	G	G	G	G	G	G	G	G
Y	7229552	1 to 17	C	T	C	T	C	T	C	C	C	C	C	C	C	C	C	C	C	C	C	C	C	C
Y	7229553	1 to 2	T	C	T	T	C	T	C	C	C	C	C	C	C	C	C	C	C	C	C	C	C	C
Y	7229655	1 to 2	G	A	G	G	A	G	A	A	A	A	A	A	A	A	A	A	A	A	A	A	A	A
Y	7229858	1 to 2	G	A	G	G	A	G	A	A	A	A	A	A	A	A	A	A	A	A	A	A	A	A
Y	7232127	2 to PTT_Vaillant	T	C	T	T	T	T	T	T	T	T	T	T	T	T	T	T	T	C	T	T	T	T
Y	7232166	3 to 15	C	T	C	C	C	C	T	C	C	C	C	C	C	C	C	T	T	C	C	C	C	C
Y	7232263	1 to 2	C	G	C	C	G	C	G	G	G	G	G	G	G	G	G	G	G	G	G	G	G	G
Y	7236299	12 to 13	C	G	C	C	C	C	C	C	C	C	C	G	C	G	G	C	C	C	C	C	C	C
Y	7238017	14 to PTE_Akwaya_Jean	G	C	G	G	G	G	G	G	G	G	G	C	G	G	G	G	G	G	G	G	G	G
Y	7238124	1 to 17	G	C	G	C	G	C	G	G	G	G	G	G	G	G	G	G	G	G	G	G	G	G
Y	7238254	1 to 17	G	C	G	C	G	C	G	G	G	G	G	G	G	G	G	G	G	G	G	G	G	G
Y	7238482	1 to 17	C	G	C	G	C	G	C	C	C	C	C	C	C	C	C	C	C	C	C	C	C	C
Y	7238538	1 to 17	C	T	C	T	C	T	C	C	C	C	C	C	C	C	C	C	C	C	C	C	C	C
Y	7242208	15 to 16	A	G	A	A	A	A	G	A	A	A	A	A	A	A	A	A	G	A	A	A	A	A
Y	7242355	2 to PTT_Vaillant	A	G	A	A	A	A	A	A	A	A	A	A	A	A	A	A	A	G	A	A	A	A
Y	7242469	1 to 17	G	A	G	A	G	A	G	G	G	G	G	G	G	G	G	G	G	G	G	G	G	G
Y	7242528	1 to 17	G	A	G	A	G	A	G	G	G	G	G	G	G	G	G	G	G	G	G	G	G	G
Y	7242563	1 to 17	G	T	G	T	G	T	G	G	G	G	G	G	G	G	G	G	G	G	G	G	G	G
Y	7242674	1 to 17	A	C	A	C	A	C	A	A	A	A	A	A	A	A	A	A	A	A	A	A	A	A
Y	7242690	1 to 2	A	G	A	A	G	A	G	G	G	G	G	G	G	G	G	G	G	G	G	G	G	G
Y	7242888	15 to PTS_Vincent	T	G	T	T	T	T	T	T	T	T	T	T	T	T	T	G	T	T	T	T	T	T
Y	7243312	16 to PTS_Bobby	G	A	G	G	G	G	A	G	G	G	G	G	G	G	G	G	G	G	G	G	G	G
Y	7243658	1 to ancestral; 4 to 12	A	C,G	G	C	C	C	C	C	C	C	C	G	G	G	G	C	C	C	C	C	C	C
Y	7243960	1 to 17	C	T	C	T	C	T	C	C	C	C	C	C	C	C	C	C	C	C	C	C	C	C
Y	7244230	1 to 17	T	A	T	A	T	A	T	T	T	T	T	T	T	T	T	T	T	T	T	T	T	T
Y	7244302	1 to 17	C	G	C	G	C	G	C	C	C	C	C	C	C	C	C	C	C	C	C	C	C	C
Y	7244324	4 to 5	C	A	C	C	A	C	C	A	A	A	A	C	C	C	C	C	C	C	A	A	A	A
Y	7244523	2 to 3	G	T	G	G	T	G	T	T	T	T	T	T	T	T	T	T	T	G	T	T	T	T
Y	7244685	3 to 15	G	A	G	G	G	G	A	G	G	G	G	G	G	G	G	A	A	G	G	G	G	G
Y	7244793	1 to 17	A	G	A	G	A	G	A	A	A	A	A	A	A	A	A	A	A	A	A	A	A	A
Y	7245953	1 to 17	G	A	G	A	G	A	G	G	G	G	G	G	G	G	G	G	G	G	G	G	G	G
Y	7245957	4 to 5	G	T	G	G	T	G	G	T	T	T	T	G	G	G	G	G	G	G	T	T	T	T
Y	7246975	1 to 17	C	T	C	T	C	T	C	C	C	C	C	C	C	C	C	C	C	C	C	C	C	C
Y	7247004	3 to 15	C	T	C	C	C	C	T	C	C	C	C	C	C	C	C	T	T	C	C	C	C	C
Y	7247461	4 to 5	C	G	C	C	G	C	C	G	G	G	G	C	C	C	C	C	C	C	G	G	G	G
Y	7247648	1 to 2	C	T	C	C	T	C	T	T	T	T	T	T	T	T	T	T	T	T	T	T	T	T
Y	7247751	4 to 5	C	T	C	C	T	C	C	T	T	T	T	C	C	C	C	C	C	C	T	T	T	T
Y	7247958	3 to 15	A	G	A	A	A	A	G	A	A	A	A	A	A	A	A	G	G	A	A	A	A	A
Y	7248022	1 to 17	A	C	A	C	A	C	A	A	A	A	A	A	A	A	A	A	A	A	A	A	A	A
Y	7248028	4 to 5	C	A	C	C	A	C	C	A	A	A	A	C	C	C	C	C	C	C	A	A	A	A
Y	7249331	2 to PTT_Vaillant	G	A	G	G	G	G	G	G	G	G	G	G	G	G	G	G	G	A	G	G	G	G
Y	7249474	12 to 13	A	G	A	A	A	A	A	A	A	A	A	G	A	G	G	A	A	A	A	A	A	A
Y	7249692	3 to 15	C	T	C	C	C	C	T	C	C	C	C	C	C	C	C	T	T	C	C	C	C	C
Y	7249773	1 to 2	T	C	T	T	C	T	C	C	C	C	C	C	C	C	C	C	C	C	C	C	C	C
Y	7250346	2 to PTT_Vaillant	G	T	G	G	G	G	G	G	G	G	G	G	G	G	G	G	G	T	G	G	G	G
Y	7250628	1 to 17	C	T	C	T	C	T	C	C	C	C	C	C	C	C	C	C	C	C	C	C	C	C
Y	7250754	2 to PTT_Vaillant	C	G	C	C	C	C	C	C	C	C	C	C	C	C	C	C	C	G	C	C	C	C
Y	7251129	2 to PTT_Vaillant	C	T	C	C	C	C	C	C	C	C	C	C	C	C	C	C	C	T	C	C	C	C
Y	7251162	1 to 17	A	G	A	G	A	G	A	A	A	A	A	A	A	A	A	A	A	A	A	A	A	A
Y	7251630	4 to 12	T	G	T	T	T	T	T	T	T	T	T	G	G	G	G	T	T	T	T	T	T	T
Y	7252488	1 to 17	A	T	A	T	A	T	A	A	A	A	A	A	A	A	A	A	A	A	A	A	A	A
Y	7252738	1 to 17	A	C	C	A	C	A	C	C	C	C	C	C	C	C	C	C	C	C	C	C	C	C
Y	7252753	2 to PTT_Vaillant	C	T	C	C	C	C	C	C	C	C	C	C	C	C	C	C	C	T	C	C	C	C
Y	7259803	4 to 12	T	C	T	T	T	T	T	T	T	T	T	C	C	C	C	T	T	T	T	T	T	T
Y	7259830	12 to PTE_Basho	G	A	G	G	G	G	G	G	G	G	G	G	A	G	G	G	G	G	G	G	G	G
Y	7260299	1 to 17	C	G	C	G	C	G	C	C	C	C	C	C	C	C	C	C	C	C	C	C	C	C
Y	7260361	1 to ancestral; 4 to 12	T	C	T	C	C	C	C	C	C	C	C	T	T	T	T	C	C	C	C	C	C	C
Y	7271469	1 to 17	C	G	C	G	C	G	C	C	C	C	C	C	C	C	C	C	C	C	C	C	C	C
Y	7271523	3 to 15	C	A	C	C	C	C	A	C	C	C	C	C	C	C	C	A	A	C	C	C	C	C
Y	7272064	3 to 15	T	C	T	T	T	T	C	T	T	T	T	T	T	T	T	C	C	T	T	T	T	T
Y	7272582	4 to 5	T	A	T	T	A	T	T	A	A	A	A	T	T	T	T	T	T	T	A	A	A	A
Y	7272890	1 to 2	T	G	T	T	G	T	G	G	G	G	G	G	G	G	G	G	G	G	G	G	G	G
Y	7273963	4 to 5	G	A	G	G	A	G	G	A	A	A	A	G	G	G	G	G	G	G	A	A	A	A
Y	7274062	2 to PTT_Vaillant	C	A	C	C	C	C	C	C	C	C	C	C	C	C	C	C	C	A	C	C	C	C
Y	7274082	3 to 15	G	A	G	G	G	G	A	G	G	G	G	G	G	G	G	A	A	G	G	G	G	G
Y	7274321	1 to 2	C	T	C	C	T	C	T	T	T	T	T	T	T	T	T	T	T	T	T	T	T	T
Y	7274514	4 to 12	A	G	A	A	A	A	A	A	A	A	A	G	G	G	G	A	A	A	A	A	A	A
Y	7277599	2 to PTT_Vaillant	G	A	G	G	G	G	G	G	G	G	G	G	G	G	G	G	G	A	G	G	G	G
Y	7277909	4 to 12	G	A	G	G	G	G	G	G	G	G	G	A	A	A	A	G	G	G	G	G	G	G
Y	7278119	12 to 13	A	G	A	A	A	A	A	A	A	A	A	G	A	G	G	A	A	A	A	A	A	A
Y	7278138	1 to 2	G	A	G	G	A	G	A	A	A	A	A	A	A	A	A	A	A	A	A	A	A	A
Y	7278265	4 to 5	C	T	C	C	T	C	C	T	T	T	T	C	C	C	C	C	C	C	T	T	T	T
Y	7279096	1 to 17	G	A	G	A	G	A	G	G	G	G	G	G	G	G	G	G	G	G	G	G	G	G
Y	7279383	1 to 2	A	T	A	A	T	A	T	T	T	T	T	T	T	T	T	T	T	T	T	T	T	T
Y	7279906	1 to 17	C	T	C	T	C	T	C	C	C	C	C	C	C	C	C	C	C	C	C	C	C	C
Y	7280000	2 to PTT_Vaillant	C	T	C	C	C	C	C	C	C	C	C	C	C	C	C	C	C	T	C	C	C	C
Y	7280010	1 to 2	G	A	G	G	A	G	A	A	A	A	A	A	A	A	A	A	A	A	A	A	A	A
Y	7280030	1 to 2	G	T	G	G	T	G	T	T	T	T	T	T	T	T	T	T	T	T	T	T	T	T
Y	7280093	1 to 17	A	C	A	C	A	C	A	A	A	A	A	A	A	A	A	A	A	A	A	A	A	A
Y	7280263	12 to 13	C	T	C	C	C	C	C	C	C	C	C	T	C	T	T	C	C	C	C	C	C	C
Y	7280592	2 to PTT_Vaillant	G	T	G	G	G	G	G	G	G	G	G	G	G	G	G	G	G	T	G	G	G	G
Y	7280634	2 to PTT_Vaillant	G	C	G	G	G	G	G	G	G	G	G	G	G	G	G	G	G	C	G	G	G	G
Y	7280714	1 to 2	A	G	A	A	G	A	G	G	G	G	G	G	G	G	G	G	G	G	G	G	G	G
Y	7280794	4 to 12	T	C	T	T	T	T	T	T	T	T	T	C	C	C	C	T	T	T	T	T	T	T
Y	7280872	1 to 17	C	T	C	T	C	T	C	C	C	C	C	C	C	C	C	C	C	C	C	C	C	C
Y	7280930	3 to 15	A	G	A	A	A	A	G	A	A	A	A	A	A	A	A	G	G	A	A	A	A	A
Y	7281217	1 to 2	T	G	T	T	G	T	G	G	G	G	G	G	G	G	G	G	G	G	G	G	G	G
Y	7281453	1 to 17	C	G	C	G	C	G	C	C	C	C	C	C	C	C	C	C	C	C	C	C	C	C
Y	7281567	15 to PTS_Vincent	A	T	A	A	A	A	A	A	A	A	A	A	A	A	A	T	A	A	A	A	A	A
Y	7282922	4 to 5	T	C	T	T	C	T	T	C	C	C	C	T	T	T	T	T	T	T	C	C	C	C
Y	7283821	1 to 17	C	T	C	T	C	T	C	C	C	C	C	C	C	C	C	C	C	C	C	C	C	C
Y	7284166	1 to 17	A	G	A	G	A	G	A	A	A	A	A	A	A	A	A	A	A	A	A	A	A	A
Y	7284573	3 to 15	G	A	G	G	G	G	A	G	G	G	G	G	G	G	G	A	A	G	G	G	G	G
Y	7284928	2 to PTT_Vaillant	A	G	A	A	A	A	A	A	A	A	A	A	A	A	A	A	A	G	A	A	A	A
Y	7285097	1 to 2	G	C	G	G	C	G	C	C	C	C	C	C	C	C	C	C	C	C	C	C	C	C
Y	7285098	1 to 2	G	T	G	G	T	G	T	T	T	T	T	T	T	T	T	T	T	T	T	T	T	T
Y	7286393	1 to 17	G	T	G	T	G	T	G	G	G	G	G	G	G	G	G	G	G	G	G	G	G	G
Y	7289222	2 to PTT_Vaillant	G	A	G	G	G	G	G	G	G	G	G	G	G	G	G	G	G	A	G	G	G	G
Y	7292188	1 to 2	G	A	G	G	A	G	A	A	A	A	A	A	A	A	A	A	A	A	A	A	A	A
Y	7292254	15 to 16	G	A	G	G	G	G	A	G	G	G	G	G	G	G	G	G	A	G	G	G	G	G
Y	7292314	1 to 17	A	C	A	C	A	C	A	A	A	A	A	A	A	A	A	A	A	A	A	A	A	A
Y	7292982	3 to 15	A	G	A	A	A	A	G	A	A	A	A	A	A	A	A	G	G	A	A	A	A	A
Y	7301842	1 to 2	A	T	A	A	T	A	T	T	T	T	T	T	T	T	T	T	T	T	T	T	T	T
Y	7302011	1 to 2	C	T	C	C	T	C	T	T	T	T	T	T	T	T	T	T	T	T	T	T	T	T
Y	7302156	1 to 2	C	T	C	C	T	C	T	T	T	T	T	T	T	T	T	T	T	T	T	T	T	T
Y	7305205	4 to 5	G	A	G	G	A	G	G	A	A	A	A	G	G	G	G	G	G	G	A	A	A	A
Y	7305547	1 to 2	T	G	T	T	G	T	G	G	G	G	G	G	G	G	G	G	G	G	G	G	G	G
Y	7305594	3 to 15	C	T	C	C	C	C	T	C	C	C	C	C	C	C	C	T	T	C	C	C	C	C
Y	7308557	1 to 2	C	T	C	C	T	C	T	T	T	T	T	T	T	T	T	T	T	T	T	T	T	T
Y	7308565	1 to 17	C	T	C	T	C	T	C	C	C	C	C	C	C	C	C	C	C	C	C	C	C	C
Y	7308856	4 to 5	T	A	A	A	T	A	A	T	T	T	T	A	A	A	A	A	A	A	T	T	T	T
Y	7309038	1 to 17	C	T	C	T	C	T	C	C	C	C	C	C	C	C	C	C	C	C	C	C	C	C
Y	7309200	12 to PTE_Basho	C	T	C	C	C	C	C	C	C	C	C	C	T	C	C	C	C	C	C	C	C	C
Y	7309250	1 to 17	T	C	T	C	T	C	T	T	T	T	T	T	T	T	T	T	T	T	T	T	T	T
Y	7310134	2 to PTT_Vaillant	A	G	A	A	A	A	A	A	A	A	A	A	A	A	A	A	A	G	A	A	A	A
Y	7312107	1 to 2	G	A	G	G	A	G	A	A	A	A	A	A	A	A	A	A	A	A	A	A	A	A
Y	7312784	15 to PTS_Vincent	G	A	A	A	A	A	A	A	A	A	A	A	A	A	A	G	A	A	A	A	A	A
Y	7313948	3 to 15	G	A	G	G	G	G	A	G	G	G	G	G	G	G	G	A	A	G	G	G	G	G
Y	7314254	1 to 2	T	C	T	T	C	T	C	C	C	C	C	C	C	C	C	C	C	C	C	C	C	C
Y	7314255	4 to 5	G	A	G	G	A	G	G	A	A	A	A	G	G	G	G	G	G	G	A	A	A	A
Y	7314330	1 to 17	C	A	C	A	C	A	C	C	C	C	C	C	C	C	C	C	C	C	C	C	C	C
Y	7314639	1 to 17	T	A	T	A	T	A	T	T	T	T	T	T	T	T	T	T	T	T	T	T	T	T
Y	7314982	12 to PTE_Basho	T	C	T	T	T	T	T	T	T	T	T	T	C	T	T	T	T	T	T	T	T	T
Y	7315424	1 to 17	G	T	G	T	G	T	G	G	G	G	G	G	G	G	G	G	G	G	G	G	G	G
Y	7315461	15 to PTS_Vincent	A	G	A	A	A	A	A	A	A	A	A	A	A	A	A	G	A	A	A	A	A	A
Y	7315531	4 to 5	G	T	G	G	T	G	G	T	T	T	T	G	G	G	G	G	G	G	T	T	T	T
Y	7316000	3 to 15	T	C	T	T	T	T	C	T	T	T	T	T	T	T	T	C	C	T	T	T	T	T
Y	7316072	3 to 15	T	C	T	T	T	T	C	T	T	T	T	T	T	T	T	C	C	T	T	T	T	T
Y	7316406	1 to 2	A	C	A	A	C	A	C	C	C	C	C	C	C	C	C	C	C	C	C	C	C	C
Y	7316462	3 to 15	C	T	C	C	C	C	T	C	C	C	C	C	C	C	C	T	T	C	C	C	C	C
Y	7317056	1 to 2	T	C	T	T	C	T	C	C	C	C	C	C	C	C	C	C	C	C	C	C	C	C
Y	7317077	3 to 15	T	A	T	T	T	T	A	T	T	T	T	T	T	T	T	A	A	T	T	T	T	T
Y	7317520	1 to 2	A	G	A	A	G	A	G	G	G	G	G	G	G	G	G	G	G	G	G	G	G	G
Y	7317554	1 to 17	G	A	G	A	G	A	G	G	G	G	G	G	G	G	G	G	G	G	G	G	G	G
Y	7317741	2 to PTT_Vaillant	C	T	C	C	C	C	C	C	C	C	C	C	C	C	C	C	C	T	C	C	C	C
Y	7317750	1 to 17	G	A	G	A	G	A	G	G	G	G	G	G	G	G	G	G	G	G	G	G	G	G
Y	7318018	1 to 17	C	T	C	T	C	T	C	C	C	C	C	C	C	C	C	C	C	C	C	C	C	C
Y	7318092	2 to PTT_Vaillant	A	T	A	A	A	A	A	A	A	A	A	A	A	A	A	A	A	T	A	A	A	A
Y	7318287	4 to 5	G	T	G	G	T	G	G	T	T	T	T	G	G	G	G	G	G	G	T	T	T	T
Y	7318614	1 to 17	A	G	G	A	G	A	G	G	G	G	G	G	G	G	G	G	G	G	G	G	G	G
Y	7318959	2 to 3	G	T	G	G	T	G	T	T	T	T	T	T	T	T	T	T	T	G	T	T	T	T
Y	7322308	1 to 17	C	T	C	T	C	T	C	C	C	C	C	C	C	C	C	C	C	C	C	C	C	C
Y	7323085	1 to 2	C	G	C	C	G	C	G	G	G	G	G	G	G	G	G	G	G	G	G	G	G	G
Y	7323195	1 to 17	C	T	C	T	C	T	C	C	C	C	C	C	C	C	C	C	C	C	C	C	C	C
Y	7323278	4 to 12	A	G	G	G	G	G	G	G	G	G	G	A	A	A	A	G	G	G	G	G	G	G
Y	7323376	1 to 2	T	G	T	T	G	T	G	G	G	G	G	G	G	G	G	G	G	G	G	G	G	G
Y	7323488	2 to 3	A	G	A	A	G	A	G	G	G	G	G	G	G	G	G	G	G	A	G	G	G	G
Y	7323658	2 to PTT_Vaillant	G	A	G	G	G	G	G	G	G	G	G	G	G	G	G	G	G	A	G	G	G	G
Y	7323741	2 to PTT_Vaillant	A	G	A	A	A	A	A	A	A	A	A	A	A	A	A	A	A	G	A	A	A	A
Y	7323889	1 to ancestral; 1 to 17; 2 to 3; 2 to PTT_Vaillant	T	C	T	C	T	C	T	T	T	T	T	T	T	T	T	T	T	C	T	T	T	T
Y	7324075	3 to 15	C	T	C	C	C	C	T	C	C	C	C	C	C	C	C	T	T	C	C	C	C	C
Y	7325415	15 to PTS_Vincent	C	G	C	C	C	C	C	C	C	C	C	C	C	C	C	G	C	C	C	C	C	C
Y	7325676	4 to 12	C	T	C	C	C	C	C	C	C	C	C	T	T	T	T	C	C	C	C	C	C	C
Y	7327024	4 to 5	C	T	C	C	T	C	C	T	T	T	T	C	C	C	C	C	C	C	T	T	T	T
Y	7327282	1 to 17	G	A	G	A	G	A	G	G	G	G	G	G	G	G	G	G	G	G	G	G	G	G
Y	7327372	2 to PTT_Vaillant	C	G	C	C	C	C	C	C	C	C	C	C	C	C	C	C	C	G	C	C	C	C
Y	7327555	1 to 2	A	G	A	A	G	A	G	G	G	G	G	G	G	G	G	G	G	G	G	G	G	G
Y	7327711	4 to 5	C	T	C	C	T	C	C	T	T	T	T	C	C	C	C	C	C	C	T	T	T	T
Y	7328221	12 to PTE_Basho	T	C	T	T	T	T	T	T	T	T	T	T	C	T	T	T	T	T	T	T	T	T
Y	7328748	3 to 4	G	C	G	G	C	G	G	C	C	C	C	C	C	C	C	G	G	G	C	C	C	C
Y	7328893	1 to 17	T	C	T	C	T	C	T	T	T	T	T	T	T	T	T	T	T	T	T	T	T	T
Y	7329032	1 to 17	C	T	C	T	C	T	C	C	C	C	C	C	C	C	C	C	C	C	C	C	C	C
Y	7329645	1 to 17	G	T	G	T	G	T	G	G	G	G	G	G	G	G	G	G	G	G	G	G	G	G
Y	7329867	15 to PTS_Vincent	A	G	A	A	A	A	A	A	A	A	A	A	A	A	A	G	A	A	A	A	A	A
Y	7330118	15 to 16	A	T	A	A	A	A	T	A	A	A	A	A	A	A	A	A	T	A	A	A	A	A
Y	7330150	1 to 17	G	C	G	C	G	C	G	G	G	G	G	G	G	G	G	G	G	G	G	G	G	G
Y	7330156	1 to 17	C	A	C	A	C	A	C	C	C	C	C	C	C	C	C	C	C	C	C	C	C	C
Y	7330223	16 to PTS_Bobby	C	A	C	C	C	C	A	C	C	C	C	C	C	C	C	C	C	C	C	C	C	C
Y	7330224	16 to PTS_Bobby	T	G	T	T	T	T	G	T	T	T	T	T	T	T	T	T	T	T	T	T	T	T
Y	7330297	1 to 2	G	A	G	G	A	G	A	A	A	A	A	A	A	A	A	A	A	A	A	A	A	A
Y	7330417	15 to PTS_Vincent	T	C	T	T	T	T	T	T	T	T	T	T	T	T	T	C	T	T	T	T	T	T
Y	7331437	15 to 16	A	G	A	A	A	A	G	A	A	A	A	A	A	A	A	A	G	A	A	A	A	A
Y	7331445	1 to 2	T	C	T	T	C	T	C	C	C	C	C	C	C	C	C	C	C	C	C	C	C	C
Y	7331480	1 to 17	A	G	A	G	A	G	A	A	A	A	A	A	A	A	A	A	A	A	A	A	A	A
Y	7332347	3 to 15	C	A	C	C	C	C	A	C	C	C	C	C	C	C	C	A	A	C	C	C	C	C
Y	7332348	1 to 2	A	G	G	G	A	G	A	A	A	A	A	A	A	A	A	A	A	A	A	A	A	A
Y	7333247	4 to 5	C	T	C	C	T	C	C	T	T	T	T	C	C	C	C	C	C	C	T	T	T	T
Y	7334205	2 to PTT_Vaillant	A	G	A	A	A	A	A	A	A	A	A	A	A	A	A	A	A	G	A	A	A	A
Y	7334256	1 to 2	C	T	C	C	T	C	T	T	T	T	T	T	T	T	T	T	T	T	T	T	T	T
Y	7334341	1 to 17	C	T	C	T	C	T	C	C	C	C	C	C	C	C	C	C	C	C	C	C	C	C
Y	7334667	12 to 13	C	T	C	C	C	C	C	C	C	C	C	T	C	T	T	C	C	C	C	C	C	C
Y	7334906	3 to 15	C	T	C	C	C	C	T	C	C	C	C	C	C	C	C	T	T	C	C	C	C	C
Y	7334918	2 to PTT_Vaillant	G	A	G	G	G	G	G	G	G	G	G	G	G	G	G	G	G	A	G	G	G	G
Y	7335172	1 to 17	G	A	G	A	G	A	G	G	G	G	G	G	G	G	G	G	G	G	G	G	G	G
Y	7335497	4 to 12	G	T	G	G	G	G	G	G	G	G	G	T	T	T	T	G	G	G	G	G	G	G
Y	7336990	3 to 4	C	T	C	C	T	C	C	T	T	T	T	T	T	T	T	C	C	C	T	T	T	T
Y	7336994	3 to 15	G	T	G	G	G	G	T	G	G	G	G	G	G	G	G	T	T	G	G	G	G	G
Y	7337062	3 to 15	C	G	C	C	C	C	G	C	C	C	C	C	C	C	C	G	G	C	C	C	C	C
Y	7337114	2 to PTT_Vaillant	G	A	G	G	G	G	G	G	G	G	G	G	G	G	G	G	G	A	G	G	G	G
Y	7337121	4 to 5	G	A	G	G	A	G	G	A	A	A	A	G	G	G	G	G	G	G	A	A	A	A
Y	7339229	1 to 17	C	T	C	T	C	T	C	C	C	C	C	C	C	C	C	C	C	C	C	C	C	C
Y	7340750	4 to 12	C	G	C	C	C	C	C	C	C	C	C	G	G	G	G	C	C	C	C	C	C	C
Y	7340846	1 to 17	G	A	G	A	G	A	G	G	G	G	G	G	G	G	G	G	G	G	G	G	G	G
Y	7340857	1 to 17	C	T	C	T	C	T	C	C	C	C	C	C	C	C	C	C	C	C	C	C	C	C
Y	7341564	1 to 17	A	C	A	C	A	C	A	A	A	A	A	A	A	A	A	A	A	A	A	A	A	A
Y	7341843	1 to 17	T	A	T	A	T	A	T	T	T	T	T	T	T	T	T	T	T	T	T	T	T	T
Y	7348162	3 to 15	C	T	C	C	C	C	T	C	C	C	C	C	C	C	C	T	T	C	C	C	C	C
Y	7348468	15 to 16	C	T	C	C	C	C	T	C	C	C	C	C	C	C	C	C	T	C	C	C	C	C
Y	7348482	2 to PTT_Vaillant	A	G	A	A	A	A	A	A	A	A	A	A	A	A	A	A	A	G	A	A	A	A
Y	7349662	4 to 5	C	T	C	C	T	C	C	T	T	T	T	C	C	C	C	C	C	C	T	T	T	T
Y	7349734	1 to 2	T	C	C	C	T	C	T	T	T	T	T	T	T	T	T	T	T	T	T	T	T	T
Y	7349873	4 to 12	T	C	T	T	T	T	T	T	T	T	T	C	C	C	C	T	T	T	T	T	T	T
Y	7350361	12 to PTE_Basho	A	G	A	A	A	A	A	A	A	A	A	A	G	A	A	A	A	A	A	A	A	A
Y	7350379	12 to 13	G	A	G	G	G	G	G	G	G	G	G	A	G	A	A	G	G	G	G	G	G	G
Y	7352040	17 to PTT_Moritz	A	C	A	A	A	C	A	A	A	A	A	A	A	A	A	A	A	A	A	A	A	A
Y	7352350	4 to 12	C	T	C	C	C	C	C	C	C	C	C	T	T	T	T	C	C	C	C	C	C	C
Y	7352457	4 to 5	C	T	C	C	T	C	C	T	T	T	T	C	C	C	C	C	C	C	T	T	T	T
Y	7352511	3 to 15	C	G	C	C	C	C	G	C	C	C	C	C	C	C	C	G	G	C	C	C	C	C
Y	7352677	12 to 13	G	A	G	G	G	G	G	G	G	G	G	A	G	A	A	G	G	G	G	G	G	G
Y	7352679	2 to PTT_Vaillant	T	C	T	T	T	T	T	T	T	T	T	T	T	T	T	T	T	C	T	T	T	T
Y	7352750	4 to 5	C	G	C	C	G	C	C	G	G	G	G	C	C	C	C	C	C	C	G	G	G	G
Y	7354057	13 to 14	T	G	T	T	T	T	T	T	T	T	T	G	T	T	G	T	T	T	T	T	T	T
Y	7354086	3 to 15	C	T	C	C	C	C	T	C	C	C	C	C	C	C	C	T	T	C	C	C	C	C
Y	7354218	4 to 12	A	G	A	A	A	A	A	A	A	A	A	G	G	G	G	A	A	A	A	A	A	A
Y	7354220	4 to 12	T	G	T	T	T	T	T	T	T	T	T	G	G	G	G	T	T	T	T	T	T	T
Y	7354264	1 to 2	T	A	A	A	T	A	T	T	T	T	T	T	T	T	T	T	T	T	T	T	T	T
Y	7354400	4 to 12	A	T	A	A	A	A	A	A	A	A	A	T	T	T	T	A	A	A	A	A	A	A
Y	7356009	1 to 17	C	T	C	T	C	T	C	C	C	C	C	C	C	C	C	C	C	C	C	C	C	C
Y	7356192	1 to 2	A	C	A	A	C	A	C	C	C	C	C	C	C	C	C	C	C	C	C	C	C	C
Y	7356323	3 to 15	A	G	A	A	A	A	G	A	A	A	A	A	A	A	A	G	G	A	A	A	A	A
Y	7356336	1 to 2	G	A	G	G	A	G	A	A	A	A	A	A	A	A	A	A	A	A	A	A	A	A
Y	7356452	1 to 17	C	T	C	T	C	T	C	C	C	C	C	C	C	C	C	C	C	C	C	C	C	C
Y	7356560	3 to 4	T	C	T	T	C	T	T	C	C	C	C	C	C	C	C	T	T	T	C	C	C	C
Y	7356564	16 to PTS_Bobby	G	A	G	G	G	G	A	G	G	G	G	G	G	G	G	G	G	G	G	G	G	G
Y	7356576	16 to PTS_Bobby	C	A,T	A	A	A	A	T	A	A	A	A	A	A	A	A	A	A	A	A	A	A	A
Y	7356577	16 to PTS_Bobby	A	G	A	A	A	A	G	A	A	A	A	A	A	A	A	A	A	A	A	A	A	A
Y	7356592	16 to PTS_Bobby	C	G	C	C	C	C	G	C	C	C	C	C	C	C	C	C	C	C	C	C	C	C
Y	7356596	16 to PTS_Bobby	T	C	T	T	T	T	C	T	T	T	T	T	T	T	T	T	T	T	T	T	T	T
Y	7356617	16 to PTS_Bobby	C	T	C	C	C	C	T	C	C	C	C	C	C	C	C	C	C	C	C	C	C	C
Y	7356618	16 to PTS_Bobby	A	G	A	A	A	A	G	A	A	A	A	A	A	A	A	A	A	A	A	A	A	A
Y	7356777	1 to 17	C	T	C	T	C	T	C	C	C	C	C	C	C	C	C	C	C	C	C	C	C	C
Y	7357103	1 to 2	T	A	T	T	A	T	A	A	A	A	A	A	A	A	A	A	A	A	A	A	A	A
Y	7357861	3 to 15	C	T	C	C	C	C	T	C	C	C	C	C	C	C	C	T	T	C	C	C	C	C
Y	7359342	12 to 13	A	G	A	A	A	A	A	A	A	A	A	G	A	G	G	A	A	A	A	A	A	A
Y	7361590	1 to 2	G	A	G	G	A	G	A	A	A	A	A	A	A	A	A	A	A	A	A	A	A	A
Y	7363222	1 to 2	G	A	G	G	A	G	A	A	A	A	A	A	A	A	A	A	A	A	A	A	A	A
Y	7363453	1 to 2	A	C	A	A	C	A	C	C	C	C	C	C	C	C	C	C	C	C	C	C	C	C
Y	7363676	4 to 5	C	A	C	C	A	C	C	A	A	A	A	C	C	C	C	C	C	C	A	A	A	A
Y	7364613	4 to 5	G	A	G	G	A	G	G	A	A	A	A	G	G	G	G	G	G	G	A	A	A	A
Y	7365153	1 to 17	C	T	C	T	C	T	C	C	C	C	C	C	C	C	C	C	C	C	C	C	C	C
Y	7365599	15 to 16	T	C	T	T	T	T	C	T	T	T	T	T	T	T	T	T	C	T	T	T	T	T
Y	7365870	4 to 5	T	C	T	T	C	T	T	C	C	C	C	T	T	T	T	T	T	T	C	C	C	C
Y	7366078	1 to ancestral; 1 to 17; 2 to 3; 2 to PTT_Vaillant	C	G	C	G	G	G	G	G	G	G	G	G	G	G	G	G	G	C	G	G	G	G
Y	7366101	2 to PTT_Vaillant	T	C	T	T	T	T	T	T	T	T	T	T	T	T	T	T	T	C	T	T	T	T
Y	7366127	1 to 17	T	C	T	C	T	C	T	T	T	T	T	T	T	T	T	T	T	T	T	T	T	T
Y	7366889	2 to PTT_Vaillant	A	T	A	A	A	A	A	A	A	A	A	A	A	A	A	A	A	T	A	A	A	A
Y	7367027	1 to 17	G	C	G	C	G	C	G	G	G	G	G	G	G	G	G	G	G	G	G	G	G	G
Y	7367049	3 to 4	G	C	G	G	C	G	G	C	C	C	C	C	C	C	C	G	G	G	C	C	C	C
Y	7375763	16 to PTS_Bwambale	A	G	A	A	A	A	A	A	A	A	A	A	A	A	A	A	G	A	A	A	A	A
Y	7375854	4 to 5	A	T	A	A	T	A	A	T	T	T	T	A	A	A	A	A	A	A	T	T	T	T
Y	7376042	1 to 17	C	A	C	A	C	A	C	C	C	C	C	C	C	C	C	C	C	C	C	C	C	C
Y	7376068	3 to 15	T	A	T	T	T	T	A	T	T	T	T	T	T	T	T	A	A	T	T	T	T	T
Y	7376172	2 to PTT_Vaillant	C	G	C	C	C	C	C	C	C	C	C	C	C	C	C	C	C	G	C	C	C	C
Y	7376228	1 to 2	T	C	T	T	C	T	C	C	C	C	C	C	C	C	C	C	C	C	C	C	C	C
Y	7376247	12 to PTE_Basho	G	A	G	G	G	G	G	G	G	G	G	G	A	G	G	G	G	G	G	G	G	G
Y	7376345	1 to 17	A	T	A	T	A	T	A	A	A	A	A	A	A	A	A	A	A	A	A	A	A	A
Y	7376808	1 to 17	A	C	A	C	A	C	A	A	A	A	A	A	A	A	A	A	A	A	A	A	A	A
Y	7376835	1 to 17	A	G	A	G	A	G	A	A	A	A	A	A	A	A	A	A	A	A	A	A	A	A
Y	7377911	1 to 2	T	C	T	T	C	T	C	C	C	C	C	C	C	C	C	C	C	C	C	C	C	C
Y	7378093	12 to PTE_Basho	T	C	T	T	T	T	T	T	T	T	T	T	C	T	T	T	T	T	T	T	T	T
Y	7378422	1 to 17	T	C	T	C	T	C	T	T	T	T	T	T	T	T	T	T	T	T	T	T	T	T
Y	7382034	2 to PTT_Vaillant	T	C	T	T	T	T	T	T	T	T	T	T	T	T	T	T	T	C	T	T	T	T
Y	7382625	3 to 4	T	C	T	T	C	T	T	C	C	C	C	C	C	C	C	T	T	T	C	C	C	C
Y	7383148	1 to 2	C	G	C	C	G	C	G	G	G	G	G	G	G	G	G	G	G	G	G	G	G	G
Y	7383413	12 to PTE_Basho	T	G	T	T	T	T	T	T	T	T	T	T	G	T	T	T	T	T	T	T	T	T
Y	7385074	3 to 15	G	A	G	G	G	G	A	G	G	G	G	G	G	G	G	A	A	G	G	G	G	G
Y	7386091	1 to 17	G	C	G	C	G	C	G	G	G	G	G	G	G	G	G	G	G	G	G	G	G	G
Y	7386279	1 to 17	G	A	G	A	G	A	G	G	G	G	G	G	G	G	G	G	G	G	G	G	G	G
Y	7386312	4 to 12	T	A	T	T	T	T	T	T	T	T	T	A	A	A	A	T	T	T	T	T	T	T
Y	7386961	1 to 17	A	T	A	T	A	T	A	A	A	A	A	A	A	A	A	A	A	A	A	A	A	A
Y	7388013	1 to 17	T	A	T	A	T	A	T	T	T	T	T	T	T	T	T	T	T	T	T	T	T	T
Y	7388522	2 to PTT_Vaillant	C	T	C	C	C	C	C	C	C	C	C	C	C	C	C	C	C	T	C	C	C	C
Y	7391039	15 to 16	A	G	G	G	G	G	A	G	G	G	G	G	G	G	G	G	A	G	G	G	G	G
Y	7396300	1 to 17	A	T	A	T	A	T	A	A	A	A	A	A	A	A	A	A	A	A	A	A	A	A
Y	7396379	1 to 17	C	G	C	G	C	G	C	C	C	C	C	C	C	C	C	C	C	C	C	C	C	C
Y	7396508	1 to 2	A	T	A	A	T	A	T	T	T	T	T	T	T	T	T	T	T	T	T	T	T	T
Y	7396813	1 to 17	A	T	A	T	A	T	A	A	A	A	A	A	A	A	A	A	A	A	A	A	A	A
Y	7397752	17 to PTT_Moritz	C	T	C	C	C	T	C	C	C	C	C	C	C	C	C	C	C	C	C	C	C	C
Y	7397834	1 to 2	T	A	T	T	A	T	A	A	A	A	A	A	A	A	A	A	A	A	A	A	A	A
Y	7397859	1 to 17	G	A	G	A	G	A	G	G	G	G	G	G	G	G	G	G	G	G	G	G	G	G
Y	7398665	1 to 2	T	A	T	T	A	T	A	A	A	A	A	A	A	A	A	A	A	A	A	A	A	A
Y	7398826	3 to 4	T	C	T	T	C	T	T	C	C	C	C	C	C	C	C	T	T	T	C	C	C	C
Y	7398915	1 to 17	C	A	C	A	C	A	C	C	C	C	C	C	C	C	C	C	C	C	C	C	C	C
Y	7399166	12 to 13	G	C	G	G	G	G	G	G	G	G	G	C	G	C	C	G	G	G	G	G	G	G
Y	7399292	1 to 2	A	G	A	A	G	A	G	G	G	G	G	G	G	G	G	G	G	G	G	G	G	G
Y	7399293	2 to PTT_Vaillant	T	A	T	T	T	T	T	T	T	T	T	T	T	T	T	T	T	A	T	T	T	T
Y	7400745	2 to PTT_Vaillant	T	C	T	T	T	T	T	T	T	T	T	T	T	T	T	T	T	C	T	T	T	T
Y	7400765	15 to PTS_Vincent	C	T	C	C	C	C	C	C	C	C	C	C	C	C	C	T	C	C	C	C	C	C
Y	7401066	12 to 13	C	G	C	C	C	C	C	C	C	C	C	G	C	G	G	C	C	C	C	C	C	C
Y	7401277	2 to PTT_Vaillant	G	A	G	G	G	G	G	G	G	G	G	G	G	G	G	G	G	A	G	G	G	G
Y	7401536	2 to PTT_Vaillant	C	T	C	C	C	C	C	C	C	C	C	C	C	C	C	C	C	T	C	C	C	C
Y	7401663	2 to 3	C	T	C	C	T	C	T	T	T	T	T	T	T	T	T	T	T	C	T	T	T	T
Y	7402090	12 to 13	T	A	T	T	T	T	T	T	T	T	T	A	T	A	A	T	T	T	T	T	T	T
Y	7402446	4 to 12	C	T	C	C	C	C	C	C	C	C	C	T	T	T	T	C	C	C	C	C	C	C
Y	7402724	3 to 15	G	A	G	G	G	G	A	G	G	G	G	G	G	G	G	A	A	G	G	G	G	G
Y	7403596	2 to PTT_Vaillant	T	C	T	T	T	T	T	T	T	T	T	T	T	T	T	T	T	C	T	T	T	T
Y	7403874	12 to PTE_Basho	C	A	C	C	C	C	C	C	C	C	C	C	A	C	C	C	C	C	C	C	C	C
Y	7404108	1 to 17	G	A	G	A	G	A	G	G	G	G	G	G	G	G	G	G	G	G	G	G	G	G
Y	7404130	1 to 17	T	A	T	A	T	A	T	T	T	T	T	T	T	T	T	T	T	T	T	T	T	T
Y	7404243	1 to 2	G	A	A	A	G	A	G	G	G	G	G	G	G	G	G	G	G	G	G	G	G	G
Y	7405750	3 to 4	T	G	T	T	G	T	T	G	G	G	G	G	G	G	G	T	T	T	G	G	G	G
Y	7406249	1 to 17	T	C	T	C	T	C	T	T	T	T	T	T	T	T	T	T	T	T	T	T	T	T
Y	7406256	1 to 2	C	T	T	T	C	T	C	C	C	C	C	C	C	C	C	C	C	C	C	C	C	C
Y	7407891	1 to 17	C	T	C	T	C	T	C	C	C	C	C	C	C	C	C	C	C	C	C	C	C	C
Y	7408292	1 to 17	C	T	C	T	C	T	C	C	C	C	C	C	C	C	C	C	C	C	C	C	C	C
Y	7408407	2 to PTT_Vaillant	C	T	C	C	C	C	C	C	C	C	C	C	C	C	C	C	C	T	C	C	C	C
Y	7408525	12 to PTE_Basho	G	A	G	G	G	G	G	G	G	G	G	G	A	G	G	G	G	G	G	G	G	G
Y	7408702	2 to PTT_Vaillant	G	A	G	G	G	G	G	G	G	G	G	G	G	G	G	G	G	A	G	G	G	G
Y	7408782	1 to 17	G	A	G	A	G	A	G	G	G	G	G	G	G	G	G	G	G	G	G	G	G	G
Y	7409782	2 to PTT_Vaillant	C	A	C	C	C	C	C	C	C	C	C	C	C	C	C	C	C	A	C	C	C	C
Y	7410523	12 to 13	C	T	C	C	C	C	C	C	C	C	C	T	C	T	T	C	C	C	C	C	C	C
Y	7410693	4 to 5	A	G	A	A	G	A	A	G	G	G	G	A	A	A	A	A	A	A	G	G	G	G
Y	7410711	4 to 5	C	T	C	C	T	C	C	T	T	T	T	C	C	C	C	C	C	C	T	T	T	T
Y	7411276	1 to ancestral; 4 to 5	T	C	T	C	T	C	C	T	T	T	T	C	C	C	C	C	C	C	T	T	T	T
Y	7411928	1 to 2	T	C	T	T	C	T	C	C	C	C	C	C	C	C	C	C	C	C	C	C	C	C
Y	7412284	12 to 13	G	T	G	G	G	G	G	G	G	G	G	T	G	T	T	G	G	G	G	G	G	G
Y	7412370	3 to 15	C	A	C	C	C	C	A	C	C	C	C	C	C	C	C	A	A	C	C	C	C	C
Y	7412522	4 to 12	A	C	A	A	A	A	A	A	A	A	A	C	C	C	C	A	A	A	A	A	A	A
Y	7412577	2 to PTT_Vaillant	C	T	C	C	C	C	C	C	C	C	C	C	C	C	C	C	C	T	C	C	C	C
Y	7412906	2 to PTT_Vaillant	T	C	T	T	T	T	T	T	T	T	T	T	T	T	T	T	T	C	T	T	T	T
Y	7413626	2 to PTT_Vaillant	A	T	A	A	A	A	A	A	A	A	A	A	A	A	A	A	A	T	A	A	A	A
Y	7413869	1 to 17	C	A	C	A	C	A	C	C	C	C	C	C	C	C	C	C	C	C	C	C	C	C
Y	7414657	1 to 17	C	T	C	T	C	T	C	C	C	C	C	C	C	C	C	C	C	C	C	C	C	C
Y	7414662	1 to 17	C	G	C	G	C	G	C	C	C	C	C	C	C	C	C	C	C	C	C	C	C	C
Y	7414718	3 to 15	C	A	C	C	C	C	A	C	C	C	C	C	C	C	C	A	A	C	C	C	C	C
Y	7415154	1 to 2	G	A	G	G	A	G	A	A	A	A	A	A	A	A	A	A	A	A	A	A	A	A
Y	7415538	1 to 17	G	A	G	A	G	A	G	G	G	G	G	G	G	G	G	G	G	G	G	G	G	G
Y	7415679	1 to 17	A	G	A	G	A	G	A	A	A	A	A	A	A	A	A	A	A	A	A	A	A	A
Y	7415717	2 to PTT_Vaillant	G	C	G	G	G	G	G	G	G	G	G	G	G	G	G	G	G	C	G	G	G	G
Y	7416020	2 to PTT_Vaillant	C	G	C	C	C	C	C	C	C	C	C	C	C	C	C	C	C	G	C	C	C	C
Y	7416239	4 to 12	A	C	A	A	A	A	A	A	A	A	A	C	C	C	C	A	A	A	A	A	A	A
Y	7416332	1 to 17	G	A	G	A	G	A	G	G	G	G	G	G	G	G	G	G	G	G	G	G	G	G
Y	7417766	12 to 13	T	A	T	T	T	T	T	T	T	T	T	A	T	A	A	T	T	T	T	T	T	T
Y	7418499	4 to 12	T	A	T	T	T	T	T	T	T	T	T	A	A	A	A	T	T	T	T	T	T	T
Y	7418835	4 to 12	A	G	A	A	A	A	A	A	A	A	A	G	G	G	G	A	A	A	A	A	A	A
Y	7419244	1 to 2	A	G	A	A	G	A	G	G	G	G	G	G	G	G	G	G	G	G	G	G	G	G
Y	7420166	1 to 17	T	C	T	C	T	C	T	T	T	T	T	T	T	T	T	T	T	T	T	T	T	T
Y	7420513	12 to 13	G	C	G	G	G	G	G	G	G	G	G	C	G	C	C	G	G	G	G	G	G	G
Y	7420891	3 to 15	G	A	G	G	G	G	A	G	G	G	G	G	G	G	G	A	A	G	G	G	G	G
Y	7420952	1 to 2	G	A	G	G	A	G	A	A	A	A	A	A	A	A	A	A	A	A	A	A	A	A
Y	7421151	12 to 13	G	T	G	G	G	G	G	G	G	G	G	T	G	T	T	G	G	G	G	G	G	G
Y	7421369	2 to PTT_Vaillant	G	C	G	G	G	G	G	G	G	G	G	G	G	G	G	G	G	C	G	G	G	G
Y	7421826	2 to PTT_Vaillant	T	G	T	T	T	T	T	T	T	T	T	T	T	T	T	T	T	G	T	T	T	T
Y	7422393	1 to 2	G	A	G	G	A	G	A	A	A	A	A	A	A	A	A	A	A	A	A	A	A	A
Y	7422409	1 to 17	C	T	C	T	C	T	C	C	C	C	C	C	C	C	C	C	C	C	C	C	C	C
Y	7422504	1 to 17	T	C	T	C	T	C	T	T	T	T	T	T	T	T	T	T	T	T	T	T	T	T
Y	7425411	1 to 17	G	T	G	T	G	T	G	G	G	G	G	G	G	G	G	G	G	G	G	G	G	G
Y	7425447	3 to 15	G	A	G	G	G	G	A	G	G	G	G	G	G	G	G	A	A	G	G	G	G	G
Y	7425965	12 to PTE_Basho	C	T	C	C	C	C	C	C	C	C	C	C	T	C	C	C	C	C	C	C	C	C
Y	7425966	1 to 17	G	A	G	A	G	A	G	G	G	G	G	G	G	G	G	G	G	G	G	G	G	G
Y	7429686	3 to 15	C	T	C	C	C	C	T	C	C	C	C	C	C	C	C	T	T	C	C	C	C	C
Y	7429778	2 to PTT_Vaillant	T	C	T	T	T	T	T	T	T	T	T	T	T	T	T	T	T	C	T	T	T	T
Y	7429796	15 to PTS_Vincent	A	G	A	A	A	A	A	A	A	A	A	A	A	A	A	G	A	A	A	A	A	A
Y	7430365	1 to 2	A	G	A	A	G	A	G	G	G	G	G	G	G	G	G	G	G	G	G	G	G	G
Y	7431139	2 to PTT_Vaillant	G	A	G	G	G	G	G	G	G	G	G	G	G	G	G	G	G	A	G	G	G	G
Y	7431462	1 to 2	C	A	C	C	A	C	A	A	A	A	A	A	A	A	A	A	A	A	A	A	A	A
Y	7431791	4 to 5	G	A	G	G	A	G	G	A	A	A	A	G	G	G	G	G	G	G	A	A	A	A
Y	7432399	1 to 17	A	G	A	G	A	G	A	A	A	A	A	A	A	A	A	A	A	A	A	A	A	A
Y	7432778	4 to 5	G	T	G	G	T	G	G	T	T	T	T	G	G	G	G	G	G	G	T	T	T	T
Y	7432866	15 to 16	C	T	C	C	C	C	T	C	C	C	C	C	C	C	C	C	T	C	C	C	C	C
Y	7433013	1 to 17	C	G	C	G	C	G	C	C	C	C	C	C	C	C	C	C	C	C	C	C	C	C
Y	7433089	12 to PTE_Basho	C	T	C	C	C	C	C	C	C	C	C	C	T	C	C	C	C	C	C	C	C	C
Y	7433176	2 to PTT_Vaillant	G	A	G	G	G	G	G	G	G	G	G	G	G	G	G	G	G	A	G	G	G	G
Y	7433189	12 to 13	C	G	C	C	C	C	C	C	C	C	C	G	C	G	G	C	C	C	C	C	C	C
Y	7433254	1 to 2	A	G	A	A	G	A	G	G	G	G	G	G	G	G	G	G	G	G	G	G	G	G
Y	7433445	4 to 12	C	T	C	C	C	C	C	C	C	C	C	T	T	T	T	C	C	C	C	C	C	C
Y	7434484	12 to PTE_Basho	A	T	A	A	A	A	A	A	A	A	A	A	T	A	A	A	A	A	A	A	A	A
Y	7435352	1 to 17	T	C	T	C	T	C	T	T	T	T	T	T	T	T	T	T	T	T	T	T	T	T
Y	7435383	4 to 12	C	T	C	C	C	C	C	C	C	C	C	T	T	T	T	C	C	C	C	C	C	C
Y	13882590	2 to PTT_Vaillant	A	T	A	A	A	A	A	A	A	A	A	A	A	A	A	A	A	T	A	A	A	A
Y	13893314	12 to PTE_Basho	C	T	C	C	C	C	C	C	C	C	C	C	T	C	C	C	C	C	C	C	C	C
Y	13913792	16 to PTS_Bobby	A	T	A	A	A	A	T	A	A	A	A	A	A	A	A	A	A	A	A	A	A	A
Y	13988447	2 to PTT_Vaillant	G	A	G	G	G	G	G	G	G	G	G	G	G	G	G	G	G	A	G	G	G	G
Y	13989419	15 to 16	C	T	C	C	C	C	T	C	C	C	C	C	C	C	C	C	T	C	C	C	C	C
Y	13989540	2 to PTT_Vaillant	G	A	G	G	G	G	G	G	G	G	G	G	G	G	G	G	G	A	G	G	G	G
Y	13989608	1 to 17	G	A	G	A	G	A	G	G	G	G	G	G	G	G	G	G	G	G	G	G	G	G
Y	13989754	3 to 15	C	A	C	C	C	C	A	C	C	C	C	C	C	C	C	A	A	C	C	C	C	C
Y	13989798	12 to PTE_Basho	A	C	A	A	A	A	A	A	A	A	A	A	C	A	A	A	A	A	A	A	A	A
Y	13989882	2 to PTT_Vaillant	C	T	C	C	C	C	C	C	C	C	C	C	C	C	C	C	C	T	C	C	C	C
Y	13990153	3 to 15	T	C	T	T	T	T	C	T	T	T	T	T	T	T	T	C	C	T	T	T	T	T
Y	13990244	2 to PTT_Vaillant	G	C	G	G	G	G	G	G	G	G	G	G	G	G	G	G	G	C	G	G	G	G
Y	13991016	1 to 2	C	A	C	C	A	C	A	A	A	A	A	A	A	A	A	A	A	A	A	A	A	A
Y	13991631	4 to 5	T	G	T	T	G	T	T	G	G	G	G	T	T	T	T	T	T	T	G	G	G	G
Y	13991730	2 to PTT_Vaillant	T	C	T	T	T	T	T	T	T	T	T	T	T	T	T	T	T	C	T	T	T	T
Y	13992004	1 to 17	A	T	A	T	A	T	A	A	A	A	A	A	A	A	A	A	A	A	A	A	A	A
Y	13992155	2 to PTT_Vaillant	G	A	G	G	G	G	G	G	G	G	G	G	G	G	G	G	G	A	G	G	G	G
Y	13992361	1 to 17	C	T	C	T	C	T	C	C	C	C	C	C	C	C	C	C	C	C	C	C	C	C
Y	13992568	1 to 17	C	T	C	T	C	T	C	C	C	C	C	C	C	C	C	C	C	C	C	C	C	C
Y	13992636	1 to 17	G	A	G	A	G	A	G	G	G	G	G	G	G	G	G	G	G	G	G	G	G	G
Y	13992827	2 to PTT_Vaillant	G	C	G	G	G	G	G	G	G	G	G	G	G	G	G	G	G	C	G	G	G	G
Y	13992927	1 to 17	C	G	C	G	C	G	C	C	C	C	C	C	C	C	C	C	C	C	C	C	C	C
Y	13992966	1 to 17	T	C	T	C	T	C	T	T	T	T	T	T	T	T	T	T	T	T	T	T	T	T
Y	13993103	12 to PTE_Basho	C	T	C	C	C	C	C	C	C	C	C	C	T	C	C	C	C	C	C	C	C	C
Y	13993369	15 to PTS_Vincent	T	C	T	T	T	T	T	T	T	T	T	T	T	T	T	C	T	T	T	T	T	T
Y	13994719	4 to 12	C	G	C	C	C	C	C	C	C	C	C	G	G	G	G	C	C	C	C	C	C	C
Y	13996995	2 to PTT_Vaillant	C	T	C	C	C	C	C	C	C	C	C	C	C	C	C	C	C	T	C	C	C	C
Y	13997019	12 to PTE_Basho	G	C	G	G	G	G	G	G	G	G	G	G	C	G	G	G	G	G	G	G	G	G
Y	13997276	12 to PTE_Basho	T	C	T	T	T	T	T	T	T	T	T	T	C	T	T	T	T	T	T	T	T	T
Y	13997670	1 to 17	T	C	T	C	T	C	T	T	T	T	T	T	T	T	T	T	T	T	T	T	T	T
Y	13997740	4 to 5	A	G	A	A	G	A	A	G	G	G	G	A	A	A	A	A	A	A	G	G	G	G
Y	13998455	4 to 12	A	T	A	A	A	A	A	A	A	A	A	T	T	T	T	A	A	A	A	A	A	A
Y	13998616	3 to 15	A	C	A	A	A	A	C	A	A	A	A	A	A	A	A	C	C	A	A	A	A	A
Y	14001042	1 to 2	A	G	G	G	A	G	A	A	A	A	A	A	A	A	A	A	A	A	A	A	A	A
Y	14001213	4 to 5	C	T	C	C	T	C	C	T	T	T	T	C	C	C	C	C	C	C	T	T	T	T
Y	14001222	2 to PTT_Vaillant	C	G	C	C	C	C	C	C	C	C	C	C	C	C	C	C	C	G	C	C	C	C
Y	14001243	1 to 17	A	T,C	T	C	T	C	T	T	T	T	T	T	T	T	T	T	T	T	T	T	T	T
Y	14002271	2 to PTT_Vaillant	G	A	G	G	G	G	G	G	G	G	G	G	G	G	G	G	G	A	G	G	G	G
Y	14003037	4 to 5	A	C	A	A	C	A	A	C	C	C	C	A	A	A	A	A	A	A	C	C	C	C
Y	14003407	1 to 17	C	A	C	A	C	A	C	C	C	C	C	C	C	C	C	C	C	C	C	C	C	C
Y	14003810	1 to 2	T	C	T	T	C	T	C	C	C	C	C	C	C	C	C	C	C	C	C	C	C	C
Y	14003816	12 to 13	A	G	A	A	A	A	A	A	A	A	A	G	A	G	G	A	A	A	A	A	A	A
Y	14004397	15 to 16	A	G	A	A	A	A	G	A	A	A	A	A	A	A	A	A	G	A	A	A	A	A
Y	14004500	12 to PTE_Basho	G	A	G	G	G	G	G	G	G	G	G	G	A	G	G	G	G	G	G	G	G	G
Y	14004643	1 to 2	A	G	A	A	G	A	G	G	G	G	G	G	G	G	G	G	G	G	G	G	G	G
Y	14004677	1 to 17	C	A	A	C	A	C	A	A	A	A	A	A	A	A	A	A	A	A	A	A	A	A
Y	14004969	4 to 5	T	A	T	T	A	T	T	A	A	A	A	T	T	T	T	T	T	T	A	A	A	A
Y	14005288	1 to 2	C	T	C	C	T	C	T	T	T	T	T	T	T	T	T	T	T	T	T	T	T	T
Y	14005900	1 to 17	G	T	G	T	G	T	G	G	G	G	G	G	G	G	G	G	G	G	G	G	G	G
Y	14006872	4 to 5	T	C	T	T	C	T	T	C	C	C	C	T	T	T	T	T	T	T	C	C	C	C
Y	14007211	1 to 17	C	G	G	C	G	C	G	G	G	G	G	G	G	G	G	G	G	G	G	G	G	G
Y	14007906	1 to 2	G	A	A	A	G	A	G	G	G	G	G	G	G	G	G	G	G	G	G	G	G	G
Y	14008009	2 to PTT_Vaillant	A	G	G	G	G	G	G	G	G	G	G	G	G	G	G	G	G	A	G	G	G	G
Y	14008176	2 to PTT_Vaillant	G	T	G	G	G	G	G	G	G	G	G	G	G	G	G	G	G	T	G	G	G	G
Y	14017297	1 to 2	G	A	G	G	A	G	A	A	A	A	A	A	A	A	A	A	A	A	A	A	A	A
Y	14017522	12 to 13	T	C	T	T	T	T	T	T	T	T	T	C	T	C	C	T	T	T	T	T	T	T
Y	14017643	1 to 17	C	T	C	T	C	T	C	C	C	C	C	C	C	C	C	C	C	C	C	C	C	C
Y	14017681	3 to 4	C	G	C	C	G	C	C	G	G	G	G	G	G	G	G	C	C	C	G	G	G	G
Y	14017775	1 to 2	C	G	C	C	G	C	G	G	G	G	G	G	G	G	G	G	G	G	G	G	G	G
Y	14017777	1 to 17	C	G	C	G	C	G	C	C	C	C	C	C	C	C	C	C	C	C	C	C	C	C
Y	14017778	1 to 2	T	C	T	T	C	T	C	C	C	C	C	C	C	C	C	C	C	C	C	C	C	C
Y	14017924	2 to PTT_Vaillant	C	A	C	C	C	C	C	C	C	C	C	C	C	C	C	C	C	A	C	C	C	C
Y	14018410	1 to 17	A	T	A	T	A	T	A	A	A	A	A	A	A	A	A	A	A	A	A	A	A	A
Y	14018477	1 to 2	G	A	A	A	G	A	G	G	G	G	G	G	G	G	G	G	G	G	G	G	G	G
Y	14018505	4 to 12	G	T	G	G	G	G	G	G	G	G	G	T	T	T	T	G	G	G	G	G	G	G
Y	14018551	4 to 5	C	A	C	C	A	C	C	A	A	A	A	C	C	C	C	C	C	C	A	A	A	A
Y	14020398	12 to 13	T	C	T	T	T	T	T	T	T	T	T	C	T	C	C	T	T	T	T	T	T	T
Y	14020875	3 to 4	G	T	G	G	T	G	G	T	T	T	T	T	T	T	T	G	G	G	T	T	T	T
Y	14020921	1 to 2	A	G	A	A	G	A	G	G	G	G	G	G	G	G	G	G	G	G	G	G	G	G
Y	14022801	15 to 16	C	T	C	C	C	C	T	C	C	C	C	C	C	C	C	C	T	C	C	C	C	C
Y	14023298	1 to 17	A	C	A	C	A	C	A	A	A	A	A	A	A	A	A	A	A	A	A	A	A	A
Y	14023461	1 to 17	T	C	T	C	T	C	T	T	T	T	T	T	T	T	T	T	T	T	T	T	T	T
Y	14023975	4 to 5	G	C	G	G	C	G	G	C	C	C	C	G	G	G	G	G	G	G	C	C	C	C
Y	14024100	1 to 17	A	G	A	G	A	G	A	A	A	A	A	A	A	A	A	A	A	A	A	A	A	A
Y	14024222	4 to 12	G	A	G	G	G	G	G	G	G	G	G	A	A	A	A	G	G	G	G	G	G	G
Y	14024244	2 to PTT_Vaillant	C	G	C	C	C	C	C	C	C	C	C	C	C	C	C	C	C	G	C	C	C	C
Y	14024261	3 to 15	C	T	C	C	C	C	T	C	C	C	C	C	C	C	C	T	T	C	C	C	C	C
Y	14024378	4 to 12	G	A	G	G	G	G	G	G	G	G	G	A	A	A	A	G	G	G	G	G	G	G
Y	14024499	2 to PTT_Vaillant	T	C	T	T	T	T	T	T	T	T	T	T	T	T	T	T	T	C	T	T	T	T
Y	14024508	2 to PTT_Vaillant	A	C	A	A	A	A	A	A	A	A	A	A	A	A	A	A	A	C	A	A	A	A
Y	14025933	3 to 15	G	A	G	G	G	G	A	G	G	G	G	G	G	G	G	A	A	G	G	G	G	G
Y	14026249	1 to 17	A	C	A	C	A	C	A	A	A	A	A	A	A	A	A	A	A	A	A	A	A	A
Y	14026298	2 to PTT_Vaillant	C	T	C	C	C	C	C	C	C	C	C	C	C	C	C	C	C	T	C	C	C	C
Y	14027992	1 to 2	G	A	G	G	A	G	A	A	A	A	A	A	A	A	A	A	A	A	A	A	A	A
Y	14029073	3 to 15	C	A	C	C	C	C	A	C	C	C	C	C	C	C	C	A	A	C	C	C	C	C
Y	14031360	2 to PTT_Vaillant	G	T	G	G	G	G	G	G	G	G	G	G	G	G	G	G	G	T	G	G	G	G
Y	14031525	1 to 17	C	T	C	T	C	T	C	C	C	C	C	C	C	C	C	C	C	C	C	C	C	C
Y	14033171	3 to 15	C	T	C	C	C	C	T	C	C	C	C	C	C	C	C	T	T	C	C	C	C	C
Y	14033438	1 to 2	C	T	C	C	T	C	T	T	T	T	T	T	T	T	T	T	T	T	T	T	T	T
Y	14033507	1 to 2	T	C	T	T	C	T	C	C	C	C	C	C	C	C	C	C	C	C	C	C	C	C
Y	14033514	1 to 17	T	C	T	C	T	C	T	T	T	T	T	T	T	T	T	T	T	T	T	T	T	T
Y	14034026	1 to 2	T	A	T	T	A	T	A	A	A	A	A	A	A	A	A	A	A	A	A	A	A	A
Y	14034202	4 to 5	G	C	G	G	C	G	G	C	C	C	C	G	G	G	G	G	G	G	C	C	C	C
Y	14034229	1 to 2	G	A	A	A	G	A	G	G	G	G	G	G	G	G	G	G	G	G	G	G	G	G
Y	14036065	12 to PTE_Basho	T	A	T	T	T	T	T	T	T	T	T	T	A	T	T	T	T	T	T	T	T	T
Y	14036242	1 to 17	C	T	C	T	C	T	C	C	C	C	C	C	C	C	C	C	C	C	C	C	C	C
Y	14036839	1 to 2	C	T	C	C	T	C	T	T	T	T	T	T	T	T	T	T	T	T	T	T	T	T
Y	14036909	17 to PTT_Moritz	C	T	C	C	C	T	C	C	C	C	C	C	C	C	C	C	C	C	C	C	C	C
Y	14036962	3 to 15	G	A	G	G	G	G	A	G	G	G	G	G	G	G	G	A	A	G	G	G	G	G
Y	14039389	3 to 15	A	G	A	A	A	A	G	A	A	A	A	A	A	A	A	G	G	A	A	A	A	A
Y	14040076	12 to 13	G	C	G	G	G	G	G	G	G	G	G	C	G	C	C	G	G	G	G	G	G	G
Y	14040171	1 to 17	A	G	A	G	A	G	A	A	A	A	A	A	A	A	A	A	A	A	A	A	A	A
Y	14040355	4 to 5	C	G	C	C	G	C	C	G	G	G	G	C	C	C	C	C	C	C	G	G	G	G
Y	14040383	2 to PTT_Vaillant	T	C	T	T	T	T	T	T	T	T	T	T	T	T	T	T	T	C	T	T	T	T
Y	14040526	1 to 2	A	C	A	A	C	A	C	C	C	C	C	C	C	C	C	C	C	C	C	C	C	C
Y	14040871	1 to 17	C	G	C	G	C	G	C	C	C	C	C	C	C	C	C	C	C	C	C	C	C	C
Y	14041676	1 to 17	A	G	A	G	A	G	A	A	A	A	A	A	A	A	A	A	A	A	A	A	A	A
Y	14043781	4 to 5	C	T	C	C	T	C	C	T	T	T	T	C	C	C	C	C	C	C	T	T	T	T
Y	14043806	4 to 12	C	A	C	C	C	C	C	C	C	C	C	A	A	A	A	C	C	C	C	C	C	C
Y	14043822	1 to 17	G	T	G	T	G	T	G	G	G	G	G	G	G	G	G	G	G	G	G	G	G	G
Y	14043898	1 to 17	G	A	G	A	G	A	G	G	G	G	G	G	G	G	G	G	G	G	G	G	G	G
Y	14043910	1 to 17	A	G	A	G	A	G	A	A	A	A	A	A	A	A	A	A	A	A	A	A	A	A
Y	14044101	4 to 5	C	A	C	C	A	C	C	A	A	A	A	C	C	C	C	C	C	C	A	A	A	A
Y	14044445	1 to 17	G	A	G	A	G	A	G	G	G	G	G	G	G	G	G	G	G	G	G	G	G	G
Y	14044666	12 to 13	G	A	G	G	G	G	G	G	G	G	G	A	G	A	A	G	G	G	G	G	G	G
Y	14045080	15 to 16	C	T	C	C	C	C	T	C	C	C	C	C	C	C	C	C	T	C	C	C	C	C
Y	14046057	1 to 2	A	G	A	A	G	A	G	G	G	G	G	G	G	G	G	G	G	G	G	G	G	G
Y	14049278	1 to 17	C	T	C	T	C	T	C	C	C	C	C	C	C	C	C	C	C	C	C	C	C	C
Y	14049473	1 to 17	A	G	A	G	A	G	A	A	A	A	A	A	A	A	A	A	A	A	A	A	A	A
Y	14049605	12 to PTE_Basho	G	A	G	G	G	G	G	G	G	G	G	G	A	G	G	G	G	G	G	G	G	G
Y	14051173	1 to 2	G	A	G	G	A	G	A	A	A	A	A	A	A	A	A	A	A	A	A	A	A	A
Y	14052524	1 to 17	C	T	C	T	C	T	C	C	C	C	C	C	C	C	C	C	C	C	C	C	C	C
Y	14054841	3 to 15	C	T	C	C	C	C	T	C	C	C	C	C	C	C	C	T	T	C	C	C	C	C
Y	14060008	1 to 17	C	T	C	T	C	T	C	C	C	C	C	C	C	C	C	C	C	C	C	C	C	C
Y	14060246	2 to PTT_Vaillant	C	T	C	C	C	C	C	C	C	C	C	C	C	C	C	C	C	T	C	C	C	C
Y	14060332	1 to 2	G	A	G	G	A	G	A	A	A	A	A	A	A	A	A	A	A	A	A	A	A	A
Y	14061295	1 to 2	G	T	G	G	T	G	T	T	T	T	T	T	T	T	T	T	T	T	T	T	T	T
Y	14061486	1 to 17	C	T	C	T	C	T	C	C	C	C	C	C	C	C	C	C	C	C	C	C	C	C
Y	14061630	2 to PTT_Vaillant	G	A	G	G	G	G	G	G	G	G	G	G	G	G	G	G	G	A	G	G	G	G
Y	14063557	2 to PTT_Vaillant	G	A	G	G	G	G	G	G	G	G	G	G	G	G	G	G	G	A	G	G	G	G
Y	14063593	3 to 15	A	G	A	A	A	A	G	A	A	A	A	A	A	A	A	G	G	A	A	A	A	A
Y	14063709	1 to 17	C	G	C	G	C	G	C	C	C	C	C	C	C	C	C	C	C	C	C	C	C	C
Y	14064112	1 to 2	G	T	T	T	G	T	G	G	G	G	G	G	G	G	G	G	G	G	G	G	G	G
Y	14064151	4 to 5	A	C	A	A	C	A	A	C	C	C	C	A	A	A	A	A	A	A	C	C	C	C
Y	14064152	12 to PTE_Basho	A	G	A	A	A	A	A	A	A	A	A	A	G	A	A	A	A	A	A	A	A	A
Y	14064333	3 to 15	T	C	C	C	C	C	T	C	C	C	C	C	C	C	C	T	T	C	C	C	C	C
Y	14064611	1 to 17	T	C	T	C	T	C	T	T	T	T	T	T	T	T	T	T	T	T	T	T	T	T
Y	14064618	12 to PTE_Basho	C	T	C	C	C	C	C	C	C	C	C	C	T	C	C	C	C	C	C	C	C	C
Y	14064664	1 to 17	A	G	A	G	A	G	A	A	A	A	A	A	A	A	A	A	A	A	A	A	A	A
Y	14064777	2 to PTT_Vaillant	G	A	G	G	G	G	G	G	G	G	G	G	G	G	G	G	G	A	G	G	G	G
Y	14064856	1 to 17	A	C	A	C	A	C	A	A	A	A	A	A	A	A	A	A	A	A	A	A	A	A
Y	14064950	1 to 17	C	G	C	G	C	G	C	C	C	C	C	C	C	C	C	C	C	C	C	C	C	C
Y	14065130	1 to ancestral; 12 to 13	A	G	A	G	G	G	G	G	G	G	G	A	G	A	A	G	G	G	G	G	G	G
Y	14065278	1 to 17	G	A	G	A	G	A	G	G	G	G	G	G	G	G	G	G	G	G	G	G	G	G
Y	14066170	1 to 2	T	C	T	T	C	T	C	C	C	C	C	C	C	C	C	C	C	C	C	C	C	C
Y	14066179	1 to 2	T	C	T	T	C	T	C	C	C	C	C	C	C	C	C	C	C	C	C	C	C	C
Y	14066447	4 to 12	C	A	C	C	C	C	C	C	C	C	C	A	A	A	A	C	C	C	C	C	C	C
Y	14066742	1 to 17	T	C	T	C	T	C	T	T	T	T	T	T	T	T	T	T	T	T	T	T	T	T
Y	14067972	2 to PTT_Vaillant	C	G	C	C	C	C	C	C	C	C	C	C	C	C	C	C	C	G	C	C	C	C
Y	14068007	12 to 13	A	G	A	A	A	A	A	A	A	A	A	G	A	G	G	A	A	A	A	A	A	A
Y	14068022	1 to 17	G	C	G	C	G	C	G	G	G	G	G	G	G	G	G	G	G	G	G	G	G	G
Y	14068393	1 to 17	G	T	G	T	G	T	G	G	G	G	G	G	G	G	G	G	G	G	G	G	G	G
Y	14068616	17 to PTT/PTV_Tommy	A	T	A	T	A	A	A	A	A	A	A	A	A	A	A	A	A	A	A	A	A	A
Y	14068734	3 to 4	C	T	C	C	T	C	C	T	T	T	T	T	T	T	T	C	C	C	T	T	T	T
Y	14069437	1 to 2	A	C	A	A	C	A	C	C	C	C	C	C	C	C	C	C	C	C	C	C	C	C
Y	14069448	12 to 13	C	T	C	C	C	C	C	C	C	C	C	T	C	T	T	C	C	C	C	C	C	C
Y	14069487	3 to 15	C	G	C	C	C	C	G	C	C	C	C	C	C	C	C	G	G	C	C	C	C	C
Y	14069715	4 to 5	T	C	T	T	C	T	T	C	C	C	C	T	T	T	T	T	T	T	C	C	C	C
Y	14070036	1 to 17	T	A	T	A	T	A	T	T	T	T	T	T	T	T	T	T	T	T	T	T	T	T
Y	14070110	1 to 17	T	C	T	C	T	C	T	T	T	T	T	T	T	T	T	T	T	T	T	T	T	T
Y	14070704	1 to 2	T	C	T	T	C	T	C	C	C	C	C	C	C	C	C	C	C	C	C	C	C	C
Y	14070750	2 to 3	A	C	A	A	C	A	C	C	C	C	C	C	C	C	C	C	C	A	C	C	C	C
Y	14070834	12 to PTE_Basho	C	G	C	C	C	C	C	C	C	C	C	C	G	C	C	C	C	C	C	C	C	C
Y	14071249	12 to PTE_Basho	C	G	C	C	C	C	C	C	C	C	C	C	G	C	C	C	C	C	C	C	C	C
Y	14071827	1 to 17	G	C	G	C	G	C	G	G	G	G	G	G	G	G	G	G	G	G	G	G	G	G
Y	14071902	1 to 17	A	T	A	T	A	T	A	A	A	A	A	A	A	A	A	A	A	A	A	A	A	A
Y	14071933	4 to 12	G	T	G	G	G	G	G	G	G	G	G	T	T	T	T	G	G	G	G	G	G	G
Y	14071946	1 to 17	A	G	A	G	A	G	A	A	A	A	A	A	A	A	A	A	A	A	A	A	A	A
Y	14071965	3 to 4	G	C	G	G	C	G	G	C	C	C	C	C	C	C	C	G	G	G	C	C	C	C
Y	14072028	3 to 15	C	T	C	C	C	C	T	C	C	C	C	C	C	C	C	T	T	C	C	C	C	C
Y	14072036	1 to 17	C	T	C	T	C	T	C	C	C	C	C	C	C	C	C	C	C	C	C	C	C	C
Y	14072847	1 to 17	G	A	G	A	G	A	G	G	G	G	G	G	G	G	G	G	G	G	G	G	G	G
Y	14073786	15 to PTS_Vincent	A	T	A	A	A	A	A	A	A	A	A	A	A	A	A	T	A	A	A	A	A	A
Y	14073787	1 to 17	A	T	T	A	T	A	T	T	T	T	T	T	T	T	T	T	T	T	T	T	T	T
Y	14073968	7 to PTV_NA03450	C	T	C	C	C	C	C	C	C	T	C	C	C	C	C	C	C	C	C	C	C	C
Y	14074006	4 to 5	C	G	C	C	G	C	C	G	G	G	G	C	C	C	C	C	C	C	G	G	G	G
Y	14075436	15 to PTS_Vincent	G	C	G	G	G	G	G	G	G	G	G	G	G	G	G	C	G	G	G	G	G	G
Y	14076265	1 to 2	C	T	C	C	T	C	T	T	T	T	T	T	T	T	T	T	T	T	T	T	T	T
Y	14076364	12 to 13	G	A	G	G	G	G	G	G	G	G	G	A	G	A	A	G	G	G	G	G	G	G
Y	14076766	4 to 5	C	T	C	C	T	C	C	T	T	T	T	C	C	C	C	C	C	C	T	T	T	T
Y	14076837	1 to 2	G	A	G	G	A	G	A	A	A	A	A	A	A	A	A	A	A	A	A	A	A	A
Y	14078439	3 to 15	A	G	A	A	A	A	G	A	A	A	A	A	A	A	A	G	G	A	A	A	A	A
Y	14078448	2 to PTT_Vaillant	A	C	A	A	A	A	A	A	A	A	A	A	A	A	A	A	A	C	A	A	A	A
Y	14078906	3 to 15	C	T	C	C	C	C	T	C	C	C	C	C	C	C	C	T	T	C	C	C	C	C
Y	14078947	1 to 17	A	G	A	G	A	G	A	A	A	A	A	A	A	A	A	A	A	A	A	A	A	A
Y	14079228	6 to 7	G	A	G	G	A	G	G	A	G	A	G	G	G	G	G	G	G	G	G	G	A	A
Y	14079800	3 to 15	A	G	G	G	G	G	A	G	G	G	G	G	G	G	G	A	A	G	G	G	G	G
Y	14081097	4 to 5	G	A	G	G	A	G	G	A	A	A	A	G	G	G	G	G	G	G	A	A	A	A
Y	14081111	4 to 12	A	C	A	A	A	A	A	A	A	A	A	C	C	C	C	A	A	A	A	A	A	A
Y	14081413	4 to 12	C	G	C	C	C	C	C	C	C	C	C	G	G	G	G	C	C	C	C	C	C	C
Y	14081869	1 to 17	T	C	T	C	T	C	T	T	T	T	T	T	T	T	T	T	T	T	T	T	T	T
Y	14082278	4 to 12	C	T	C	C	C	C	C	C	C	C	C	T	T	T	T	C	C	C	C	C	C	C
Y	14082346	1 to 17	C	T	C	T	C	T	C	C	C	C	C	C	C	C	C	C	C	C	C	C	C	C
Y	14082444	1 to 17	C	T	C	T	C	T	C	C	C	C	C	C	C	C	C	C	C	C	C	C	C	C
Y	14082631	2 to PTT_Vaillant	C	T	C	C	C	C	C	C	C	C	C	C	C	C	C	C	C	T	C	C	C	C
Y	14083107	4 to 5	C	T	C	C	T	C	C	T	T	T	T	C	C	C	C	C	C	C	T	T	T	T
Y	14083177	17 to PTT_Moritz	A	G	A	A	A	G	A	A	A	A	A	A	A	A	A	A	A	A	A	A	A	A
Y	14083289	1 to 17	C	A	C	A	C	A	C	C	C	C	C	C	C	C	C	C	C	C	C	C	C	C
Y	14083370	2 to PTT_Vaillant	A	G	A	A	A	A	A	A	A	A	A	A	A	A	A	A	A	G	A	A	A	A
Y	14083452	4 to 12	T	A	T	T	T	T	T	T	T	T	T	A	A	A	A	T	T	T	T	T	T	T
Y	14084630	12 to 13	C	G	C	C	C	C	C	C	C	C	C	G	C	G	G	C	C	C	C	C	C	C
Y	14085242	1 to 2	C	T	C	C	T	C	T	T	T	T	T	T	T	T	T	T	T	T	T	T	T	T
Y	14088651	3 to 15	G	A	G	G	G	G	A	G	G	G	G	G	G	G	G	A	A	G	G	G	G	G
Y	14089014	4 to 12	A	T	A	A	A	A	A	A	A	A	A	T	T	T	T	A	A	A	A	A	A	A
Y	14089473	1 to 2	C	G	C	C	G	C	G	G	G	G	G	G	G	G	G	G	G	G	G	G	G	G
Y	14090044	3 to 15	C	A	C	C	C	C	A	C	C	C	C	C	C	C	C	A	A	C	C	C	C	C
Y	14090327	4 to 5	A	G	G	G	A	G	G	A	A	A	A	G	G	G	G	G	G	G	A	A	A	A
Y	14090380	1 to 17	G	A	G	A	G	A	G	G	G	G	G	G	G	G	G	G	G	G	G	G	G	G
Y	14090467	1 to 2	C	T	C	C	T	C	T	T	T	T	T	T	T	T	T	T	T	T	T	T	T	T
Y	14090642	1 to 17	G	A	G	A	G	A	G	G	G	G	G	G	G	G	G	G	G	G	G	G	G	G
Y	14090835	1 to 17	C	T	C	T	C	T	C	C	C	C	C	C	C	C	C	C	C	C	C	C	C	C
Y	14090934	3 to 15	C	T	C	C	C	C	T	C	C	C	C	C	C	C	C	T	T	C	C	C	C	C
Y	14090972	2 to PTT_Vaillant	T	C	T	T	T	T	T	T	T	T	T	T	T	T	T	T	T	C	T	T	T	T
Y	14091090	4 to 5	G	A	G	G	A	G	G	A	A	A	A	G	G	G	G	G	G	G	A	A	A	A
Y	14091335	3 to 15	G	A	G	G	G	G	A	G	G	G	G	G	G	G	G	A	A	G	G	G	G	G
Y	14091668	1 to 2	T	C	T	T	C	T	C	C	C	C	C	C	C	C	C	C	C	C	C	C	C	C
Y	14091762	1 to 17	C	T	C	T	C	T	C	C	C	C	C	C	C	C	C	C	C	C	C	C	C	C
Y	14091795	1 to 17; 3 to 15	C	T	T	C	T	C	C	T	T	T	T	T	T	T	T	C	C	T	T	T	T	T
Y	14091880	4 to 12	C	T	C	C	C	C	C	C	C	C	C	T	T	T	T	C	C	C	C	C	C	C
Y	14091899	2 to PTT_Vaillant	A	G	A	A	A	A	A	A	A	A	A	A	A	A	A	A	A	G	A	A	A	A
Y	14091982	2 to PTT_Vaillant	C	A	C	C	C	C	C	C	C	C	C	C	C	C	C	C	C	A	C	C	C	C
Y	14092304	2 to PTT_Vaillant	C	T	C	C	C	C	C	C	C	C	C	C	C	C	C	C	C	T	C	C	C	C
Y	14092424	12 to PTE_Basho	T	G	T	T	T	T	T	T	T	T	T	T	G	T	T	T	T	T	T	T	T	T
Y	14092727	4 to 5	G	A	G	G	A	G	G	A	A	A	A	G	G	G	G	G	G	G	A	A	A	A
Y	14093830	1 to 17	G	T	G	T	G	T	G	G	G	G	G	G	G	G	G	G	G	G	G	G	G	G
Y	14094737	12 to PTE_Basho	G	A	G	G	G	G	G	G	G	G	G	G	A	G	G	G	G	G	G	G	G	G
Y	14094806	3 to 15	C	A	C	C	C	C	A	C	C	C	C	C	C	C	C	A	A	C	C	C	C	C
Y	14094960	1 to 17	A	G	A	G	A	G	A	A	A	A	A	A	A	A	A	A	A	A	A	A	A	A
Y	14095333	4 to 12	T	C	T	T	T	T	T	T	T	T	T	C	C	C	C	T	T	T	T	T	T	T
Y	14095555	1 to 17	C	A	C	A	C	A	C	C	C	C	C	C	C	C	C	C	C	C	C	C	C	C
Y	14095619	1 to 17	T	C	T	C	T	C	T	T	T	T	T	T	T	T	T	T	T	T	T	T	T	T
Y	14095687	1 to 17	C	T	C	T	C	T	C	C	C	C	C	C	C	C	C	C	C	C	C	C	C	C
Y	14095837	12 to 13	T	C	T	T	T	T	T	T	T	T	T	C	T	C	C	T	T	T	T	T	T	T
Y	14095951	4 to 5	G	T	G	G	T	G	G	T	T	T	T	G	G	G	G	G	G	G	T	T	T	T
Y	14096389	1 to 17	A	T	A	T	A	T	A	A	A	A	A	A	A	A	A	A	A	A	A	A	A	A
Y	14097326	1 to 2	C	G	C	C	G	C	G	G	G	G	G	G	G	G	G	G	G	G	G	G	G	G
Y	14098182	1 to 17	A	C	A	C	A	C	A	A	A	A	A	A	A	A	A	A	A	A	A	A	A	A
Y	14098315	2 to PTT_Vaillant	C	G	C	C	C	C	C	C	C	C	C	C	C	C	C	C	C	G	C	C	C	C
Y	14099518	1 to 17	G	A	G	A	G	A	G	G	G	G	G	G	G	G	G	G	G	G	G	G	G	G
Y	14099689	2 to PTT_Vaillant	A	C	A	A	A	A	A	A	A	A	A	A	A	A	A	A	A	C	A	A	A	A
Y	14099840	1 to ancestral; 1 to 17; 2 to 3; 2 to PTT_Vaillant	C	G	C	G	C	G	C	C	C	C	C	C	C	C	C	C	C	G	C	C	C	C
Y	14101495	1 to 17	G	C	G	C	G	C	G	G	G	G	G	G	G	G	G	G	G	G	G	G	G	G
Y	14103742	1 to 2	A	C	A	A	C	A	C	C	C	C	C	C	C	C	C	C	C	C	C	C	C	C
Y	14103894	1 to 17	A	G	A	G	A	G	A	A	A	A	A	A	A	A	A	A	A	A	A	A	A	A
Y	14103898	15 to 16	A	G	A	A	A	A	G	A	A	A	A	A	A	A	A	A	G	A	A	A	A	A
Y	14104889	1 to 17	T	A	T	A	T	A	T	T	T	T	T	T	T	T	T	T	T	T	T	T	T	T
Y	14104939	1 to 2	C	T	C	C	T	C	T	T	T	T	T	T	T	T	T	T	T	T	T	T	T	T
Y	14104988	3 to 15	G	C	G	G	G	G	C	G	G	G	G	G	G	G	G	C	C	G	G	G	G	G
Y	14108966	4 to 12	C	T	C	C	C	C	C	C	C	C	C	T	T	T	T	C	C	C	C	C	C	C
Y	14109196	12 to 13	A	G	A	A	A	A	A	A	A	A	A	G	A	G	G	A	A	A	A	A	A	A
Y	14115498	17 to PTT_Moritz	G	A	G	G	G	A	G	G	G	G	G	G	G	G	G	G	G	G	G	G	G	G
Y	14115597	12 to PTE_Basho	A	C	A	A	A	A	A	A	A	A	A	A	C	A	A	A	A	A	A	A	A	A
Y	14115614	4 to 5	G	A	G	G	A	G	G	A	A	A	A	G	G	G	G	G	G	G	A	A	A	A
Y	14117347	1 to 2	G	C	G	G	C	G	C	C	C	C	C	C	C	C	C	C	C	C	C	C	C	C
Y	14117387	1 to 17	C	T	C	T	C	T	C	C	C	C	C	C	C	C	C	C	C	C	C	C	C	C
Y	14117401	1 to 17	C	T	C	T	C	T	C	C	C	C	C	C	C	C	C	C	C	C	C	C	C	C
Y	14117508	4 to 12	G	A	G	G	G	G	G	G	G	G	G	A	A	A	A	G	G	G	G	G	G	G
Y	14117585	1 to 17	G	T	G	T	G	T	G	G	G	G	G	G	G	G	G	G	G	G	G	G	G	G
Y	14124277	17 to PTT/PTV_Tommy	C	T	C	T	C	C	C	C	C	C	C	C	C	C	C	C	C	C	C	C	C	C
Y	14124278	4 to 5	G	A	G	G	A	G	G	A	A	A	A	G	G	G	G	G	G	G	A	A	A	A
Y	14124803	17 to PTT/PTV_Tommy	G	A	A	G	A	A	A	A	A	A	A	A	A	A	A	A	A	A	A	A	A	A
Y	14125383	1 to 17	G	A	G	A	G	A	G	G	G	G	G	G	G	G	G	G	G	G	G	G	G	G
Y	14126122	1 to 17	G	C	G	C	G	C	G	G	G	G	G	G	G	G	G	G	G	G	G	G	G	G
Y	14126272	4 to 5	T	A	T	T	A	T	T	A	A	A	A	T	T	T	T	T	T	T	A	A	A	A
Y	14126400	3 to 15	G	A	G	G	G	G	A	G	G	G	G	G	G	G	G	A	A	G	G	G	G	G
Y	14126501	2 to PTT_Vaillant	C	G	C	C	C	C	C	C	C	C	C	C	C	C	C	C	C	G	C	C	C	C
Y	14126502	2 to PTT_Vaillant	A	C	A	A	A	A	A	A	A	A	A	A	A	A	A	A	A	C	A	A	A	A
Y	14126760	1 to ancestral; 3 to 4	G	A	G	A	G	A	A	G	G	G	G	G	G	G	G	A	A	A	G	G	G	G
Y	14126864	2 to PTT_Vaillant	G	T	G	G	G	G	G	G	G	G	G	G	G	G	G	G	G	T	G	G	G	G
Y	14127201	4 to 12	A	G	A	A	A	A	A	A	A	A	A	G	G	G	G	A	A	A	A	A	A	A
Y	14127440	3 to 15	G	T	G	G	G	G	T	G	G	G	G	G	G	G	G	T	T	G	G	G	G	G
Y	14136471	1 to 17	C	A	C	A	C	A	C	C	C	C	C	C	C	C	C	C	C	C	C	C	C	C
Y	14136767	12 to 13	T	C	T	T	T	T	T	T	T	T	T	C	T	C	C	T	T	T	T	T	T	T
Y	14137268	1 to 2	G	A	G	G	A	G	A	A	A	A	A	A	A	A	A	A	A	A	A	A	A	A
Y	14137482	1 to 17	T	C	T	C	T	C	T	T	T	T	T	T	T	T	T	T	T	T	T	T	T	T
Y	14138179	1 to 17	T	C	T	C	T	C	T	T	T	T	T	T	T	T	T	T	T	T	T	T	T	T
Y	14138190	1 to 2	C	T	C	C	T	C	T	T	T	T	T	T	T	T	T	T	T	T	T	T	T	T
Y	14138266	1 to 17	T	A	T	A	T	A	T	T	T	T	T	T	T	T	T	T	T	T	T	T	T	T
Y	14138313	2 to PTT_Vaillant	C	T	C	C	C	C	C	C	C	C	C	C	C	C	C	C	C	T	C	C	C	C
Y	14138650	1 to 17	C	T	C	T	C	T	C	C	C	C	C	C	C	C	C	C	C	C	C	C	C	C
Y	14138685	1 to 17	C	T	C	T	C	T	C	C	C	C	C	C	C	C	C	C	C	C	C	C	C	C
Y	14138760	4 to 12	T	C	T	T	T	T	T	T	T	T	T	C	C	C	C	T	T	T	T	T	T	T
Y	14138813	4 to 12	C	T	C	C	C	C	C	C	C	C	C	T	T	T	T	C	C	C	C	C	C	C
Y	14139240	2 to PTT_Vaillant	A	C	A	A	A	A	A	A	A	A	A	A	A	A	A	A	A	C	A	A	A	A
Y	14140032	1 to 2	G	A	G	G	A	G	A	A	A	A	A	A	A	A	A	A	A	A	A	A	A	A
Y	14141159	3 to 15	C	G	C	C	C	C	G	C	C	C	C	C	C	C	C	G	G	C	C	C	C	C
Y	14141359	1 to 2	T	C	T	T	C	T	C	C	C	C	C	C	C	C	C	C	C	C	C	C	C	C
Y	14141460	3 to 15	T	C	C	C	C	C	T	C	C	C	C	C	C	C	C	T	T	C	C	C	C	C
Y	14142173	12 to 13	T	C	T	T	T	T	T	T	T	T	T	C	T	C	C	T	T	T	T	T	T	T
Y	14142732	4 to 5	T	A	T	T	A	T	T	A	A	A	A	T	T	T	T	T	T	T	A	A	A	A
Y	14142774	1 to 2	A	T,C	C	C	T	C	T	T	T	T	T	T	T	T	T	T	T	T	T	T	T	T
Y	14142778	4 to 5	C	T	C	C	T	C	C	T	T	T	T	C	C	C	C	C	C	C	T	T	T	T
Y	14143157	1 to 17; 4 to 12	C	A,G	C	A	C	A	C	C	C	C	C	G	G	G	G	C	C	C	C	C	C	C
Y	14143761	12 to 13	G	T	G	G	G	G	G	G	G	G	G	T	G	T	T	G	G	G	G	G	G	G
Y	14144020	1 to 17	G	A	G	A	G	A	G	G	G	G	G	G	G	G	G	G	G	G	G	G	G	G
Y	14144058	4 to 5	T	C	T	T	C	T	T	C	C	C	C	T	T	T	T	T	T	T	C	C	C	C
Y	14144991	1 to 17	T	G	T	G	T	G	T	T	T	T	T	T	T	T	T	T	T	T	T	T	T	T
Y	14145096	4 to 5	C	T	C	C	T	C	C	T	T	T	T	C	C	C	C	C	C	C	T	T	T	T
Y	14145126	1 to 17	T	A	T	A	T	A	T	T	T	T	T	T	T	T	T	T	T	T	T	T	T	T
Y	14145317	1 to 2	A	C	A	A	C	A	C	C	C	C	C	C	C	C	C	C	C	C	C	C	C	C
Y	14145318	1 to 2	T	C	T	T	C	T	C	C	C	C	C	C	C	C	C	C	C	C	C	C	C	C
Y	14145343	1 to 2	C	T	C	C	T	C	T	T	T	T	T	T	T	T	T	T	T	T	T	T	T	T
Y	14145372	1 to 2	C	T	C	C	T	C	T	T	T	T	T	T	T	T	T	T	T	T	T	T	T	T
Y	14148271	12 to PTE_Basho	G	A	G	G	G	G	G	G	G	G	G	G	A	G	G	G	G	G	G	G	G	G
Y	14148428	1 to 17	A	G	A	G	A	G	A	A	A	A	A	A	A	A	A	A	A	A	A	A	A	A
Y	14148635	1 to 17	C	T	C	T	C	T	C	C	C	C	C	C	C	C	C	C	C	C	C	C	C	C
Y	14148964	1 to 2	C	T	C	C	T	C	T	T	T	T	T	T	T	T	T	T	T	T	T	T	T	T
Y	14149140	3 to 15	A	G	A	A	A	A	G	A	A	A	A	A	A	A	A	G	G	A	A	A	A	A
Y	14149388	12 to PTE_Basho	T	C	T	T	T	T	T	T	T	T	T	T	C	T	T	T	T	T	T	T	T	T
Y	14149889	1 to 2	A	G	A	A	G	A	G	G	G	G	G	G	G	G	G	G	G	G	G	G	G	G
Y	14149946	12 to PTE_Basho	A	G	A	A	A	A	A	A	A	A	A	A	G	A	A	A	A	A	A	A	A	A
Y	14150144	1 to 2	G	C	G	G	C	G	C	C	C	C	C	C	C	C	C	C	C	C	C	C	C	C
Y	14150379	3 to 15	G	C	G	G	G	G	C	G	G	G	G	G	G	G	G	C	C	G	G	G	G	G
Y	14150485	2 to PTT_Vaillant	G	T	G	G	G	G	G	G	G	G	G	G	G	G	G	G	G	T	G	G	G	G
Y	14150860	1 to 17	T	A	T	A	T	A	T	T	T	T	T	T	T	T	T	T	T	T	T	T	T	T
Y	14150900	1 to 2	A	G	A	A	G	A	G	G	G	G	G	G	G	G	G	G	G	G	G	G	G	G
Y	14151455	3 to 15	G	A	G	G	G	G	A	G	G	G	G	G	G	G	G	A	A	G	G	G	G	G
Y	14151742	3 to 15	G	A	G	G	G	G	A	G	G	G	G	G	G	G	G	A	A	G	G	G	G	G
Y	14151758	16 to PTS_Bobby	C	A	C	C	C	C	A	C	C	C	C	C	C	C	C	C	C	C	C	C	C	C
Y	14151902	8 to PTE/PTV_EB176JC	A	T	A	A	A	A	A	T	A	A	A	A	A	A	A	A	A	A	A	A	A	A
Y	14151920	1 to 2	A	G	A	A	G	A	G	G	G	G	G	G	G	G	G	G	G	G	G	G	G	G
Y	14152380	15 to PTS_Vincent	C	T	C	C	C	C	C	C	C	C	C	C	C	C	C	T	C	C	C	C	C	C
Y	14152459	15 to 16	G	A	G	G	G	G	A	G	G	G	G	G	G	G	G	G	A	G	G	G	G	G
Y	14152664	4 to 5	A	C	A	A	C	A	A	C	C	C	C	A	A	A	A	A	A	A	C	C	C	C
Y	14159394	3 to 4	C	G	C	C	G	C	C	G	G	G	G	G	G	G	G	C	C	C	G	G	G	G
Y	14159815	3 to 15	C	A	C	C	C	C	A	C	C	C	C	C	C	C	C	A	A	C	C	C	C	C
Y	14160249	1 to 17	G	A	G	A	G	A	G	G	G	G	G	G	G	G	G	G	G	G	G	G	G	G
Y	14168419	1 to 17	T	A	T	A	T	A	T	T	T	T	T	T	T	T	T	T	T	T	T	T	T	T
Y	14168671	1 to 17	A	T	A	T	A	T	A	A	A	A	A	A	A	A	A	A	A	A	A	A	A	A
Y	14168796	3 to 15	C	T	C	C	C	C	T	C	C	C	C	C	C	C	C	T	T	C	C	C	C	C
Y	14168797	3 to 15	A	G	A	A	A	A	G	A	A	A	A	A	A	A	A	G	G	A	A	A	A	A
Y	14168837	3 to 15	C	G	C	C	C	C	G	C	C	C	C	C	C	C	C	G	G	C	C	C	C	C
Y	14169050	1 to 17	T	C	T	C	T	C	T	T	T	T	T	T	T	T	T	T	T	T	T	T	T	T
Y	14169102	1 to 17	T	A	T	A	T	A	T	T	T	T	T	T	T	T	T	T	T	T	T	T	T	T
Y	14169258	3 to 15	G	T	G	G	G	G	T	G	G	G	G	G	G	G	G	T	T	G	G	G	G	G
Y	14169372	17 to PTT_Moritz	A	T	A	A	A	T	A	A	A	A	A	A	A	A	A	A	A	A	A	A	A	A
Y	14169459	1 to 2	T	C	T	T	C	T	C	C	C	C	C	C	C	C	C	C	C	C	C	C	C	C
Y	14169641	3 to 15	G	A	G	G	G	G	A	G	G	G	G	G	G	G	G	A	A	G	G	G	G	G
Y	14169753	1 to 17	C	A	C	A	C	A	C	C	C	C	C	C	C	C	C	C	C	C	C	C	C	C
Y	14170003	1 to 2	G	T	G	G	T	G	T	T	T	T	T	T	T	T	T	T	T	T	T	T	T	T
Y	14170313	3 to 15	G	A	G	G	G	G	A	G	G	G	G	G	G	G	G	A	A	G	G	G	G	G
Y	14170466	2 to PTT_Vaillant	C	T	C	C	C	C	C	C	C	C	C	C	C	C	C	C	C	T	C	C	C	C
Y	14170713	4 to 5	A	C	A	A	C	A	A	C	C	C	C	A	A	A	A	A	A	A	C	C	C	C
Y	14170781	4 to 12	G	A	G	G	G	G	G	G	G	G	G	A	A	A	A	G	G	G	G	G	G	G
Y	14170960	3 to 15	G	T	G	G	G	G	T	G	G	G	G	G	G	G	G	T	T	G	G	G	G	G
Y	14171085	1 to 17	A	G	A	G	A	G	A	A	A	A	A	A	A	A	A	A	A	A	A	A	A	A
Y	14171827	12 to PTE_Basho	A	G	A	A	A	A	A	A	A	A	A	A	G	A	A	A	A	A	A	A	A	A
Y	14173853	2 to PTT_Vaillant	C	T	C	C	C	C	C	C	C	C	C	C	C	C	C	C	C	T	C	C	C	C
Y	14174260	17 to PTT/PTV_Tommy	T	C	T	C	T	T	T	T	T	T	T	T	T	T	T	T	T	T	T	T	T	T
Y	14176781	1 to 17	C	T	C	T	C	T	C	C	C	C	C	C	C	C	C	C	C	C	C	C	C	C
Y	14176890	1 to 2	T	A	T	T	A	T	A	A	A	A	A	A	A	A	A	A	A	A	A	A	A	A
Y	14176928	1 to 17	C	T	C	T	C	T	C	C	C	C	C	C	C	C	C	C	C	C	C	C	C	C
Y	14176930	12 to PTE_Basho	C	G	C	C	C	C	C	C	C	C	C	C	G	C	C	C	C	C	C	C	C	C
Y	14176948	1 to 2	A	G	A	A	G	A	G	G	G	G	G	G	G	G	G	G	G	G	G	G	G	G
Y	14177018	1 to 17	T	A	T	A	T	A	T	T	T	T	T	T	T	T	T	T	T	T	T	T	T	T
Y	14177376	3 to 15	C	T	C	C	C	C	T	C	C	C	C	C	C	C	C	T	T	C	C	C	C	C
Y	14177653	1 to 2	G	A	G	G	A	G	A	A	A	A	A	A	A	A	A	A	A	A	A	A	A	A
Y	14177682	1 to 17	G	A	G	A	G	A	G	G	G	G	G	G	G	G	G	G	G	G	G	G	G	G
Y	14177773	1 to 2	G	A	G	G	A	G	A	A	A	A	A	A	A	A	A	A	A	A	A	A	A	A
Y	14183532	2 to 3	T	A	T	T	A	T	A	A	A	A	A	A	A	A	A	A	A	T	A	A	A	A
Y	14183818	1 to 2	G	T	G	G	T	G	T	T	T	T	T	T	T	T	T	T	T	T	T	T	T	T
Y	14183936	1 to 17	C	T	C	T	C	T	C	C	C	C	C	C	C	C	C	C	C	C	C	C	C	C
Y	14184870	2 to 3	A	G	A	A	G	A	G	G	G	G	G	G	G	G	G	G	G	A	G	G	G	G
Y	14185093	4 to 5	T	G	T	T	G	T	T	G	G	G	G	T	T	T	T	T	T	T	G	G	G	G
Y	14185333	3 to 15	G	A	G	G	G	G	A	G	G	G	G	G	G	G	G	A	A	G	G	G	G	G
Y	14185365	1 to 2	T	C	T	T	C	T	C	C	C	C	C	C	C	C	C	C	C	C	C	C	C	C
Y	14186365	1 to 17	G	A	G	A	G	A	G	G	G	G	G	G	G	G	G	G	G	G	G	G	G	G
Y	14188220	1 to 2	G	A	G	G	A	G	A	A	A	A	A	A	A	A	A	A	A	A	A	A	A	A
Y	14188448	1 to 17	G	T	G	T	G	T	G	G	G	G	G	G	G	G	G	G	G	G	G	G	G	G
Y	14188578	3 to 15	C	G	C	C	C	C	G	C	C	C	C	C	C	C	C	G	G	C	C	C	C	C
Y	14189139	1 to 2	C	T	C	C	T	C	T	T	T	T	T	T	T	T	T	T	T	T	T	T	T	T
Y	14189507	1 to 17	T	C	T	C	T	C	T	T	T	T	T	T	T	T	T	T	T	T	T	T	T	T
Y	14189574	2 to PTT_Vaillant	G	A	G	G	G	G	G	G	G	G	G	G	G	G	G	G	G	A	G	G	G	G
Y	14189937	1 to 17	T	G	T	G	T	G	T	T	T	T	T	T	T	T	T	T	T	T	T	T	T	T
Y	14189948	3 to 15	C	A	C	C	C	C	A	C	C	C	C	C	C	C	C	A	A	C	C	C	C	C
Y	14190011	4 to 5	C	A	C	C	A	C	C	A	A	A	A	C	C	C	C	C	C	C	A	A	A	A
Y	14190165	12 to PTE_Basho	C	T	C	C	C	C	C	C	C	C	C	C	T	C	C	C	C	C	C	C	C	C
Y	14190907	1 to 17	G	A	G	A	G	A	G	G	G	G	G	G	G	G	G	G	G	G	G	G	G	G
Y	14192322	1 to 17	T	C	T	C	T	C	T	T	T	T	T	T	T	T	T	T	T	T	T	T	T	T
Y	14192391	1 to 2	T	C	T	T	C	T	C	C	C	C	C	C	C	C	C	C	C	C	C	C	C	C
Y	14192584	2 to PTT_Vaillant	C	T	C	C	C	C	C	C	C	C	C	C	C	C	C	C	C	T	C	C	C	C
Y	14192715	1 to 17	G	A	G	A	G	A	G	G	G	G	G	G	G	G	G	G	G	G	G	G	G	G
Y	14192800	12 to 13	C	A	C	C	C	C	C	C	C	C	C	A	C	A	A	C	C	C	C	C	C	C
Y	14192887	12 to 13	A	T	A	A	A	A	A	A	A	A	A	T	A	T	T	A	A	A	A	A	A	A
Y	14193250	1 to 17	C	T	C	T	C	T	C	C	C	C	C	C	C	C	C	C	C	C	C	C	C	C
Y	14193270	2 to PTT_Vaillant	C	T	C	C	C	C	C	C	C	C	C	C	C	C	C	C	C	T	C	C	C	C
Y	14193709	1 to 2	C	G	C	C	G	C	G	G	G	G	G	G	G	G	G	G	G	G	G	G	G	G
Y	14194266	1 to 17	T	C	C	T	C	T	C	C	C	C	C	C	C	C	C	C	C	C	C	C	C	C
Y	14194499	1 to 17	C	T	C	T	C	T	C	C	C	C	C	C	C	C	C	C	C	C	C	C	C	C
Y	14196155	1 to 17	C	T	C	T	C	T	C	C	C	C	C	C	C	C	C	C	C	C	C	C	C	C
Y	14196294	1 to 17	T	A	T	A	T	A	T	T	T	T	T	T	T	T	T	T	T	T	T	T	T	T
Y	14196486	1 to 17	T	G	T	G	T	G	T	T	T	T	T	T	T	T	T	T	T	T	T	T	T	T
Y	14196517	2 to PTT_Vaillant	T	A	T	T	T	T	T	T	T	T	T	T	T	T	T	T	T	A	T	T	T	T
Y	14196739	4 to 12	T	C	T	T	T	T	T	T	T	T	T	C	C	C	C	T	T	T	T	T	T	T
Y	14197701	1 to 2	C	T	C	C	T	C	T	T	T	T	T	T	T	T	T	T	T	T	T	T	T	T
Y	14197733	4 to 12	T	G	T	T	T	T	T	T	T	T	T	G	G	G	G	T	T	T	T	T	T	T
Y	14199212	3 to 15	G	A	G	G	G	G	A	G	G	G	G	G	G	G	G	A	A	G	G	G	G	G
Y	14199273	12 to PTE_Basho	C	A	C	C	C	C	C	C	C	C	C	C	A	C	C	C	C	C	C	C	C	C
Y	14199607	2 to PTT_Vaillant	C	T	C	C	C	C	C	C	C	C	C	C	C	C	C	C	C	T	C	C	C	C
Y	14199995	3 to 15	G	A	G	G	G	G	A	G	G	G	G	G	G	G	G	A	A	G	G	G	G	G
Y	14200209	12 to 13	A	G	A	A	A	A	A	A	A	A	A	G	A	G	G	A	A	A	A	A	A	A
Y	14200465	4 to 12	T	C	T	T	T	T	T	T	T	T	T	C	C	C	C	T	T	T	T	T	T	T
Y	14200516	17 to PTT/PTV_Tommy	G	A	G	A	G	G	G	G	G	G	G	G	G	G	G	G	G	G	G	G	G	G
Y	14200542	17 to PTT/PTV_Tommy	G	A	G	A	G	G	G	G	G	G	G	G	G	G	G	G	G	G	G	G	G	G
Y	14200630	2 to PTT_Vaillant	T	C	T	T	T	T	T	T	T	T	T	T	T	T	T	T	T	C	T	T	T	T
Y	14201382	1 to 17	G	C	G	C	G	C	G	G	G	G	G	G	G	G	G	G	G	G	G	G	G	G
Y	14201671	2 to PTT_Vaillant	C	T	C	C	C	C	C	C	C	C	C	C	C	C	C	C	C	T	C	C	C	C
Y	14201986	12 to 13	G	A	G	G	G	G	G	G	G	G	G	A	G	A	A	G	G	G	G	G	G	G
Y	14202362	12 to 13	A	G	A	A	A	A	A	A	A	A	A	G	A	G	G	A	A	A	A	A	A	A
Y	14202703	1 to 17	G	A	A	G	A	G	A	A	A	A	A	A	A	A	A	A	A	A	A	A	A	A
Y	14205317	4 to 5	T	G	T	T	G	T	T	G	G	G	G	T	T	T	T	T	T	T	G	G	G	G
Y	14205684	1 to 17	A	G	A	G	A	G	A	A	A	A	A	A	A	A	A	A	A	A	A	A	A	A
Y	14205788	4 to 5	C	T	C	C	T	C	C	T	T	T	T	C	C	C	C	C	C	C	T	T	T	T
Y	14205945	6 to PTV_Bosco	G	C,T	C	C	C	C	C	C	C	C	C	C	C	C	C	C	C	C	T	C	C	C
Y	14206193	1 to 17	C	A	C	A	C	A	C	C	C	C	C	C	C	C	C	C	C	C	C	C	C	C
Y	14206230	1 to 17	T	G	T	G	T	G	T	T	T	T	T	T	T	T	T	T	T	T	T	T	T	T
Y	14206514	1 to 2	C	A	C	C	A	C	A	A	A	A	A	A	A	A	A	A	A	A	A	A	A	A
Y	14206651	3 to 15	G	T	G	G	G	G	T	G	G	G	G	G	G	G	G	T	T	G	G	G	G	G
Y	14206791	1 to 2	A	C	A	A	C	A	C	C	C	C	C	C	C	C	C	C	C	C	C	C	C	C
Y	14207064	1 to 2	A	C,G	G	G	C	G	C	C	C	C	C	C	C	C	C	C	C	C	C	C	C	C
Y	14207070	1 to 17	T	G	T	G	T	G	T	T	T	T	T	T	T	T	T	T	T	T	T	T	T	T
Y	14207180	12 to 13	G	C	G	G	G	G	G	G	G	G	G	C	G	C	C	G	G	G	G	G	G	G
Y	14207181	7 to PTV_NA03450	T	C	T	T	T	T	T	T	T	C	T	T	T	T	T	T	T	T	T	T	T	T
Y	14207663	1 to 2	C	T	T	T	C	T	C	C	C	C	C	C	C	C	C	C	C	C	C	C	C	C
Y	14207776	1 to 2	A	G	A	A	G	A	G	G	G	G	G	G	G	G	G	G	G	G	G	G	G	G
Y	14208174	1 to 17	C	A	C	A	C	A	C	C	C	C	C	C	C	C	C	C	C	C	C	C	C	C
Y	14208183	1 to 2	A	T	A	A	T	A	T	T	T	T	T	T	T	T	T	T	T	T	T	T	T	T
Y	14208374	1 to 2	G	A	G	G	A	G	A	A	A	A	A	A	A	A	A	A	A	A	A	A	A	A
Y	14209439	15 to 16	C	T	C	C	C	C	T	C	C	C	C	C	C	C	C	C	T	C	C	C	C	C
Y	14209485	1 to 17	T	C	T	C	T	C	T	T	T	T	T	T	T	T	T	T	T	T	T	T	T	T
Y	14210642	1 to 2	A	T	A	A	T	A	T	T	T	T	T	T	T	T	T	T	T	T	T	T	T	T
Y	14210751	3 to 4	C	T	C	C	T	C	C	T	T	T	T	T	T	T	T	C	C	C	T	T	T	T
Y	14210820	1 to 2	A	T	A	A	T	A	T	T	T	T	T	T	T	T	T	T	T	T	T	T	T	T
Y	14211391	15 to PTS_Vincent	C	T	C	C	C	C	C	C	C	C	C	C	C	C	C	T	C	C	C	C	C	C
Y	14212777	1 to 2	A	T	A	A	T	A	T	T	T	T	T	T	T	T	T	T	T	T	T	T	T	T
Y	14212857	3 to 15	C	T	C	C	C	C	T	C	C	C	C	C	C	C	C	T	T	C	C	C	C	C
Y	14213111	1 to 17	G	A	G	A	G	A	G	G	G	G	G	G	G	G	G	G	G	G	G	G	G	G
Y	14214184	1 to 2	C	G	C	C	G	C	G	G	G	G	G	G	G	G	G	G	G	G	G	G	G	G
Y	14215323	3 to 15	C	T	C	C	C	C	T	C	C	C	C	C	C	C	C	T	T	C	C	C	C	C
Y	14215675	1 to 17	C	A	C	A	C	A	C	C	C	C	C	C	C	C	C	C	C	C	C	C	C	C
Y	14216149	4 to 5	T	C	T	T	C	T	T	C	C	C	C	T	T	T	T	T	T	T	C	C	C	C
Y	14216163	1 to 2	G	A	G	G	A	G	A	A	A	A	A	A	A	A	A	A	A	A	A	A	A	A
Y	14216245	4 to 5	G	A	G	G	A	G	G	A	A	A	A	G	G	G	G	G	G	G	A	A	A	A
Y	14216291	3 to 4	C	T	C	C	T	C	C	T	T	T	T	T	T	T	T	C	C	C	T	T	T	T
Y	14216301	4 to 5	T	C	T	T	C	T	T	C	C	C	C	T	T	T	T	T	T	T	C	C	C	C
Y	14216731	12 to 13	A	G	A	A	A	A	A	A	A	A	A	G	A	G	G	A	A	A	A	A	A	A
Y	14217437	1 to 17	C	T	C	T	C	T	C	C	C	C	C	C	C	C	C	C	C	C	C	C	C	C
Y	14218923	1 to 2	A	G	A	A	G	A	G	G	G	G	G	G	G	G	G	G	G	G	G	G	G	G
Y	14219087	12 to 13	T	A	T	T	T	T	T	T	T	T	T	A	T	A	A	T	T	T	T	T	T	T
Y	14220120	1 to 17	C	A	C	A	C	A	C	C	C	C	C	C	C	C	C	C	C	C	C	C	C	C
Y	14220251	3 to 15	T	C	T	T	T	T	C	T	T	T	T	T	T	T	T	C	C	T	T	T	T	T
Y	14220554	1 to 17	G	A	G	A	G	A	G	G	G	G	G	G	G	G	G	G	G	G	G	G	G	G
Y	14221429	1 to 17	A	G	A	G	A	G	A	A	A	A	A	A	A	A	A	A	A	A	A	A	A	A
Y	14221687	1 to 2	A	G	A	A	G	A	G	G	G	G	G	G	G	G	G	G	G	G	G	G	G	G
Y	14222137	1 to 17	T	C	T	C	T	C	T	T	T	T	T	T	T	T	T	T	T	T	T	T	T	T
Y	14222264	1 to 2	T	C	T	T	C	T	C	C	C	C	C	C	C	C	C	C	C	C	C	C	C	C
Y	14222416	3 to 15	C	A	C	C	C	C	A	C	C	C	C	C	C	C	C	A	A	C	C	C	C	C
Y	14225016	1 to 17	T	C	T	C	T	C	T	T	T	T	T	T	T	T	T	T	T	T	T	T	T	T
Y	14225204	1 to 2	G	A	G	G	A	G	A	A	A	A	A	A	A	A	A	A	A	A	A	A	A	A
Y	14225556	3 to 15	C	T	C	C	C	C	T	C	C	C	C	C	C	C	C	T	T	C	C	C	C	C
Y	14225919	1 to 2	C	T	C	C	T	C	T	T	T	T	T	T	T	T	T	T	T	T	T	T	T	T
Y	14226119	4 to 5	A	C	A	A	C	A	A	C	C	C	C	A	A	A	A	A	A	A	C	C	C	C
Y	14226170	3 to 15	A	G	A	A	A	A	G	A	A	A	A	A	A	A	A	G	G	A	A	A	A	A
Y	14226235	2 to PTT_Vaillant	C	T	C	C	C	C	C	C	C	C	C	C	C	C	C	C	C	T	C	C	C	C
Y	14226278	4 to 5	A	G	A	A	G	A	A	G	G	G	G	A	A	A	A	A	A	A	G	G	G	G
Y	14227114	4 to 12	T	C	T	T	T	T	T	T	T	T	T	C	C	C	C	T	T	T	T	T	T	T
Y	14229315	4 to 12	C	T	C	C	C	C	C	C	C	C	C	T	T	T	T	C	C	C	C	C	C	C
Y	14229916	1 to 17	T	C	C	T	C	T	C	C	C	C	C	C	C	C	C	C	C	C	C	C	C	C
Y	14230118	12 to 13	A	G	A	A	A	A	A	A	A	A	A	G	A	G	G	A	A	A	A	A	A	A
Y	14230754	3 to 4	C	A	C	C	A	C	C	A	A	A	A	A	A	A	A	C	C	C	A	A	A	A
Y	14230793	4 to 12	T	C	T	T	T	T	T	T	T	T	T	C	C	C	C	T	T	T	T	T	T	T
Y	14230852	2 to PTT_Vaillant	C	T	C	C	C	C	C	C	C	C	C	C	C	C	C	C	C	T	C	C	C	C
Y	14230873	12 to PTE_Basho	T	C	T	T	T	T	T	T	T	T	T	T	C	T	T	T	T	T	T	T	T	T
Y	14231725	1 to 17	T	C	T	C	T	C	T	T	T	T	T	T	T	T	T	T	T	T	T	T	T	T
Y	14232204	4 to 5	C	T	C	C	T	C	C	T	T	T	T	C	C	C	C	C	C	C	T	T	T	T
Y	14233967	1 to 2	C	A	C	C	A	C	A	A	A	A	A	A	A	A	A	A	A	A	A	A	A	A
Y	14234083	1 to 2	T	A	T	T	A	T	A	A	A	A	A	A	A	A	A	A	A	A	A	A	A	A
Y	14234150	2 to 3	C	T	C	C	T	C	T	T	T	T	T	T	T	T	T	T	T	C	T	T	T	T
Y	14234157	1 to 2; 4 to 5	A	C,T	A	A	T	A	C	T	T	T	T	C	C	C	C	C	C	C	T	T	T	T
Y	14235433	1 to 17	A	G	G	A	G	A	G	G	G	G	G	G	G	G	G	G	G	G	G	G	G	G
Y	14235636	1 to 2	C	T	C	C	T	C	T	T	T	T	T	T	T	T	T	T	T	T	T	T	T	T
Y	14235665	1 to 2	G	T	G	G	T	G	T	T	T	T	T	T	T	T	T	T	T	T	T	T	T	T
Y	14235747	1 to 17	A	C	A	C	A	C	A	A	A	A	A	A	A	A	A	A	A	A	A	A	A	A
Y	14235832	4 to 5	C	T	C	C	T	C	C	T	T	T	T	C	C	C	C	C	C	C	T	T	T	T
Y	14236126	1 to 2	C	T	C	C	T	C	T	T	T	T	T	T	T	T	T	T	T	T	T	T	T	T
Y	14236592	1 to 2	A	G	A	A	G	A	G	G	G	G	G	G	G	G	G	G	G	G	G	G	G	G
Y	14236606	1 to 17	G	A	A	G	A	G	A	A	A	A	A	A	A	A	A	A	A	A	A	A	A	A
Y	14237677	1 to 2	C	T	C	C	T	C	T	T	T	T	T	T	T	T	T	T	T	T	T	T	T	T
Y	14240599	1 to 17	T	C	T	C	T	C	T	T	T	T	T	T	T	T	T	T	T	T	T	T	T	T
Y	14240802	2 to 3	C	T	C	C	T	C	T	T	T	T	T	T	T	T	T	T	T	C	T	T	T	T
Y	14241184	1 to 17	C	T	C	T	C	T	C	C	C	C	C	C	C	C	C	C	C	C	C	C	C	C
Y	14241375	2 to PTT_Vaillant	G	A	G	G	G	G	G	G	G	G	G	G	G	G	G	G	G	A	G	G	G	G
Y	14241459	1 to 17	C	A	C	A	C	A	C	C	C	C	C	C	C	C	C	C	C	C	C	C	C	C
Y	14241940	1 to 2	G	A	G	G	A	G	A	A	A	A	A	A	A	A	A	A	A	A	A	A	A	A
Y	14243771	1 to 2	A	G	A	A	G	A	G	G	G	G	G	G	G	G	G	G	G	G	G	G	G	G
Y	14243776	1 to 17	A	C	A	C	A	C	A	A	A	A	A	A	A	A	A	A	A	A	A	A	A	A
Y	14243833	1 to 2; 4 to 12	G	C,T	G	G	C	G	C	C	C	C	C	T	T	T	T	C	C	C	C	C	C	C
Y	14243856	12 to 13	C	A	C	C	C	C	C	C	C	C	C	A	C	A	A	C	C	C	C	C	C	C
Y	14244543	3 to 4	C	A	C	C	A	C	C	A	A	A	A	A	A	A	A	C	C	C	A	A	A	A
Y	14244585	12 to 13	T	C	T	T	T	T	T	T	T	T	T	C	T	C	C	T	T	T	T	T	T	T
Y	14244745	1 to 2	G	T	T	T	G	T	G	G	G	G	G	G	G	G	G	G	G	G	G	G	G	G
Y	14245440	15 to PTS_Vincent	T	C	T	T	T	T	T	T	T	T	T	T	T	T	T	C	T	T	T	T	T	T
Y	14245910	12 to PTE_Basho	C	T	C	C	C	C	C	C	C	C	C	C	T	C	C	C	C	C	C	C	C	C
Y	14246002	1 to 2	C	A	C	C	A	C	A	A	A	A	A	A	A	A	A	A	A	A	A	A	A	A
Y	14246055	4 to 5	G	A	G	G	A	G	G	A	A	A	A	G	G	G	G	G	G	G	A	A	A	A
Y	14246463	2 to PTT_Vaillant	T	C	T	T	T	T	T	T	T	T	T	T	T	T	T	T	T	C	T	T	T	T
Y	14247711	1 to 17	G	A	G	A	G	A	G	G	G	G	G	G	G	G	G	G	G	G	G	G	G	G
Y	14247903	4 to 5	C	G	C	C	G	C	C	G	G	G	G	C	C	C	C	C	C	C	G	G	G	G
Y	14248397	17 to PTT_Moritz	G	A	G	G	G	A	G	G	G	G	G	G	G	G	G	G	G	G	G	G	G	G
Y	14248622	1 to 2	C	T	C	C	T	C	T	T	T	T	T	T	T	T	T	T	T	T	T	T	T	T
Y	14248834	15 to PTS_Vincent	A	G	A	A	A	A	A	A	A	A	A	A	A	A	A	G	A	A	A	A	A	A
Y	14248881	1 to 17	C	T	C	T	C	T	C	C	C	C	C	C	C	C	C	C	C	C	C	C	C	C
Y	14248907	1 to 2; 15 to 16	T	C	T	T	C	T	T	C	C	C	C	C	C	C	C	C	T	C	C	C	C	C
Y	14248918	1 to 2	T	C	T	T	C	T	C	C	C	C	C	C	C	C	C	C	C	C	C	C	C	C
Y	14254361	2 to PTT_Vaillant	C	G	C	C	C	C	C	C	C	C	C	C	C	C	C	C	C	G	C	C	C	C
Y	14254408	1 to 17	C	T	C	T	C	T	C	C	C	C	C	C	C	C	C	C	C	C	C	C	C	C
Y	14261957	4 to 5	T	A	T	T	A	T	T	A	A	A	A	T	T	T	T	T	T	T	A	A	A	A
Y	14262093	1 to 17	G	A	G	A	G	A	G	G	G	G	G	G	G	G	G	G	G	G	G	G	G	G
Y	14262172	1 to 2	G	A	G	G	A	G	A	A	A	A	A	A	A	A	A	A	A	A	A	A	A	A
Y	14262510	2 to PTT_Vaillant	C	G	C	C	C	C	C	C	C	C	C	C	C	C	C	C	C	G	C	C	C	C
Y	14262609	1 to 2	G	A	G	G	A	G	A	A	A	A	A	A	A	A	A	A	A	A	A	A	A	A
Y	14262700	15 to PTS_Vincent	G	T	G	G	G	G	G	G	G	G	G	G	G	G	G	T	G	G	G	G	G	G
Y	14263020	4 to 5	T	C	T	T	C	T	T	C	C	C	C	T	T	T	T	T	T	T	C	C	C	C
Y	14263194	1 to 17	G	T	G	T	G	T	G	G	G	G	G	G	G	G	G	G	G	G	G	G	G	G
Y	14264486	1 to 17	T	G,A	G	A	G	A	G	G	G	G	G	G	G	G	G	G	G	G	G	G	G	G
Y	14264669	1 to 17	T	A	T	A	T	A	T	T	T	T	T	T	T	T	T	T	T	T	T	T	T	T
Y	14264821	16 to PTS_Bobby	A	T	A	A	A	A	T	A	A	A	A	A	A	A	A	A	A	A	A	A	A	A
Y	14274852	1 to 2	G	A	A	A	G	A	G	G	G	G	G	G	G	G	G	G	G	G	G	G	G	G
Y	14275619	3 to 15	T	C	T	T	T	T	C	T	T	T	T	T	T	T	T	C	C	T	T	T	T	T
Y	14277399	12 to PTE_Basho	G	A	G	G	G	G	G	G	G	G	G	G	A	G	G	G	G	G	G	G	G	G
Y	14277842	3 to 15	A	G	A	A	A	A	G	A	A	A	A	A	A	A	A	G	G	A	A	A	A	A
Y	14281356	3 to 15	C	G	C	C	C	C	G	C	C	C	C	C	C	C	C	G	G	C	C	C	C	C
Y	14281382	4 to 12	C	G	C	C	C	C	C	C	C	C	C	G	G	G	G	C	C	C	C	C	C	C
Y	14281462	12 to 13	C	A	C	C	C	C	C	C	C	C	C	A	C	A	A	C	C	C	C	C	C	C
Y	14281585	1 to 2	C	G	C	C	G	C	G	G	G	G	G	G	G	G	G	G	G	G	G	G	G	G
Y	14281636	4 to 5	C	A,G	G	G	A	G	G	A	A	A	A	G	G	G	G	G	G	G	A	A	A	A
Y	14281726	12 to 13	C	G	C	C	C	C	C	C	C	C	C	G	C	G	G	C	C	C	C	C	C	C
Y	14281765	12 to 13	C	G	C	C	C	C	C	C	C	C	C	G	C	G	G	C	C	C	C	C	C	C
Y	14282033	12 to PTE_Basho	T	C	T	T	T	T	T	T	T	T	T	T	C	T	T	T	T	T	T	T	T	T
Y	14282073	1 to 17	G	C	G	C	G	C	G	G	G	G	G	G	G	G	G	G	G	G	G	G	G	G
Y	14282182	12 to 13	A	G	A	A	A	A	A	A	A	A	A	G	A	G	G	A	A	A	A	A	A	A
Y	14282486	2 to PTT_Vaillant	A	G	A	A	A	A	A	A	A	A	A	A	A	A	A	A	A	G	A	A	A	A
Y	14282498	1 to 17	C	T	C	T	C	T	C	C	C	C	C	C	C	C	C	C	C	C	C	C	C	C
Y	14282594	1 to 2	T	G,C	C	C	G	C	G	G	G	G	G	G	G	G	G	G	G	G	G	G	G	G
Y	14282740	1 to 17	C	G	C	G	C	G	C	C	C	C	C	C	C	C	C	C	C	C	C	C	C	C
Y	14284422	1 to 17	T	A	T	A	T	A	T	T	T	T	T	T	T	T	T	T	T	T	T	T	T	T
Y	14284995	3 to 15	G	T	G	G	G	G	T	G	G	G	G	G	G	G	G	T	T	G	G	G	G	G
Y	14285121	1 to 17	G	A	G	A	G	A	G	G	G	G	G	G	G	G	G	G	G	G	G	G	G	G
Y	14285376	12 to PTE_Basho	G	A	G	G	G	G	G	G	G	G	G	G	A	G	G	G	G	G	G	G	G	G
Y	14285614	1 to 17	C	T	C	T	C	T	C	C	C	C	C	C	C	C	C	C	C	C	C	C	C	C
Y	14285713	1 to 2	T	C	T	T	C	T	C	C	C	C	C	C	C	C	C	C	C	C	C	C	C	C
Y	14285769	1 to 2	A	G	A	A	G	A	G	G	G	G	G	G	G	G	G	G	G	G	G	G	G	G
Y	14286510	12 to 13	G	A	G	G	G	G	G	G	G	G	G	A	G	A	A	G	G	G	G	G	G	G
Y	14286728	1 to 17	A	C	A	C	A	C	A	A	A	A	A	A	A	A	A	A	A	A	A	A	A	A
Y	14287428	1 to 17	C	G	C	G	C	G	C	C	C	C	C	C	C	C	C	C	C	C	C	C	C	C
Y	14287957	1 to 2	A	G	A	A	G	A	G	G	G	G	G	G	G	G	G	G	G	G	G	G	G	G
Y	14288440	4 to 12	C	T	C	C	C	C	C	C	C	C	C	T	T	T	T	C	C	C	C	C	C	C
Y	14288441	1 to 2	A	G	A	A	G	A	G	G	G	G	G	G	G	G	G	G	G	G	G	G	G	G
Y	14288450	12 to 13	G	T	G	G	G	G	G	G	G	G	G	T	G	T	T	G	G	G	G	G	G	G
Y	14288905	2 to PTT_Vaillant	T	C	T	T	T	T	T	T	T	T	T	T	T	T	T	T	T	C	T	T	T	T
Y	14293242	4 to 12	C	T	C	C	C	C	C	C	C	C	C	T	T	T	T	C	C	C	C	C	C	C
Y	14293706	1 to 17	T	C	T	C	T	C	T	T	T	T	T	T	T	T	T	T	T	T	T	T	T	T
Y	14293974	1 to 17	C	T	C	T	C	T	C	C	C	C	C	C	C	C	C	C	C	C	C	C	C	C
Y	14294868	12 to 13	C	T	C	C	C	C	C	C	C	C	C	T	C	T	T	C	C	C	C	C	C	C
Y	14295097	1 to 17	C	T	C	T	C	T	C	C	C	C	C	C	C	C	C	C	C	C	C	C	C	C
Y	14297695	3 to 15	C	T	C	C	C	C	T	C	C	C	C	C	C	C	C	T	T	C	C	C	C	C
Y	14298928	1 to 2	C	T	C	C	T	C	T	T	T	T	T	T	T	T	T	T	T	T	T	T	T	T
Y	14299676	1 to 2	G	A	G	G	A	G	A	A	A	A	A	A	A	A	A	A	A	A	A	A	A	A
Y	14309751	2 to PTT_Vaillant	G	A	G	G	G	G	G	G	G	G	G	G	G	G	G	G	G	A	G	G	G	G
Y	14309784	1 to 17	C	G	C	G	C	G	C	C	C	C	C	C	C	C	C	C	C	C	C	C	C	C
Y	14310379	1 to 17	C	G	C	G	C	G	C	C	C	C	C	C	C	C	C	C	C	C	C	C	C	C
Y	14310458	1 to 2	A	C	A	A	C	A	C	C	C	C	C	C	C	C	C	C	C	C	C	C	C	C
Y	14310487	1 to 2	T	C	T	T	C	T	C	C	C	C	C	C	C	C	C	C	C	C	C	C	C	C
Y	14310494	1 to 17	A	G	A	G	A	G	A	A	A	A	A	A	A	A	A	A	A	A	A	A	A	A
Y	14310586	1 to 17	C	G	C	G	C	G	C	C	C	C	C	C	C	C	C	C	C	C	C	C	C	C
Y	14312222	12 to 13	G	T	G	G	G	G	G	G	G	G	G	T	G	T	T	G	G	G	G	G	G	G
Y	14312630	15 to PTS_Vincent	T	C	T	T	T	T	T	T	T	T	T	T	T	T	T	C	T	T	T	T	T	T
Y	14313486	3 to 4	C	A	C	C	A	C	C	A	A	A	A	A	A	A	A	C	C	C	A	A	A	A
Y	14314529	4 to 12	A	G	A	A	A	A	A	A	A	A	A	G	G	G	G	A	A	A	A	A	A	A
Y	14314671	15 to 16	T	C	T	T	T	T	C	T	T	T	T	T	T	T	T	T	C	T	T	T	T	T
Y	14314749	1 to 17	G	A	G	A	G	A	G	G	G	G	G	G	G	G	G	G	G	G	G	G	G	G
Y	14314962	4 to 12	C	A	C	C	C	C	C	C	C	C	C	A	A	A	A	C	C	C	C	C	C	C
Y	14315010	3 to 15	C	G	C	C	C	C	G	C	C	C	C	C	C	C	C	G	G	C	C	C	C	C
Y	14315849	16 to PTS_Bwambale	C	T	C	C	C	C	C	C	C	C	C	C	C	C	C	C	T	C	C	C	C	C
Y	14315949	4 to 5	G	C	G	G	C	G	G	C	C	C	C	G	G	G	G	G	G	G	C	C	C	C
Y	14316270	4 to 5	A	G	A	A	G	A	A	G	G	G	G	A	A	A	A	A	A	A	G	G	G	G
Y	14317935	2 to PTT_Vaillant	T	C	T	T	T	T	T	T	T	T	T	T	T	T	T	T	T	C	T	T	T	T
Y	14318789	1 to 2	T	C	T	T	C	T	C	C	C	C	C	C	C	C	C	C	C	C	C	C	C	C
Y	14318802	2 to PTT_Vaillant	T	C	T	T	T	T	T	T	T	T	T	T	T	T	T	T	T	C	T	T	T	T
Y	14319185	2 to PTT_Vaillant	G	A	G	G	G	G	G	G	G	G	G	G	G	G	G	G	G	A	G	G	G	G
Y	14321385	1 to 17	T	G	T	G	T	G	T	T	T	T	T	T	T	T	T	T	T	T	T	T	T	T
Y	14321728	1 to 17	T	C	C	T	C	T	C	C	C	C	C	C	C	C	C	C	C	C	C	C	C	C
Y	14323806	1 to 2	T	G	T	T	G	T	G	G	G	G	G	G	G	G	G	G	G	G	G	G	G	G
Y	14323933	12 to 13	T	C	T	T	T	T	T	T	T	T	T	C	T	C	C	T	T	T	T	T	T	T
Y	14323935	4 to 12	C	G	C	C	C	C	C	C	C	C	C	G	G	G	G	C	C	C	C	C	C	C
Y	14326444	4 to 12	A	C	A	A	A	A	A	A	A	A	A	C	C	C	C	A	A	A	A	A	A	A
Y	14327648	1 to 17	C	T	C	T	C	T	C	C	C	C	C	C	C	C	C	C	C	C	C	C	C	C
Y	14328691	2 to PTT_Vaillant	C	G	C	C	C	C	C	C	C	C	C	C	C	C	C	C	C	G	C	C	C	C
Y	14333434	2 to PTT_Vaillant	G	A	G	G	G	G	G	G	G	G	G	G	G	G	G	G	G	A	G	G	G	G
Y	14335330	2 to PTT_Vaillant	T	A	T	T	T	T	T	T	T	T	T	T	T	T	T	T	T	A	T	T	T	T
Y	14338077	2 to PTT_Vaillant	C	G	C	C	C	C	C	C	C	C	C	C	C	C	C	C	C	G	C	C	C	C
Y	14339313	1 to 17	C	A	C	A	C	A	C	C	C	C	C	C	C	C	C	C	C	C	C	C	C	C
Y	14339476	1 to 17	T	A	T	A	T	A	T	T	T	T	T	T	T	T	T	T	T	T	T	T	T	T
Y	14339493	1 to 17	A	G	A	G	A	G	A	A	A	A	A	A	A	A	A	A	A	A	A	A	A	A
Y	14340951	1 to 2	A	C	A	A	C	A	C	C	C	C	C	C	C	C	C	C	C	C	C	C	C	C
Y	14343101	1 to 17	C	T	C	T	C	T	C	C	C	C	C	C	C	C	C	C	C	C	C	C	C	C
Y	14343663	2 to PTT_Vaillant	A	T	A	A	A	A	A	A	A	A	A	A	A	A	A	A	A	T	A	A	A	A
Y	14345247	1 to 2	A	T	A	A	T	A	T	T	T	T	T	T	T	T	T	T	T	T	T	T	T	T
Y	14345893	1 to 2	A	G	A	A	G	A	G	G	G	G	G	G	G	G	G	G	G	G	G	G	G	G
Y	14345930	1 to 2	A	G	A	A	G	A	G	G	G	G	G	G	G	G	G	G	G	G	G	G	G	G
Y	14346533	1 to 2	A	G	A	A	G	A	G	G	G	G	G	G	G	G	G	G	G	G	G	G	G	G
Y	14347055	1 to 17	C	G	C	G	C	G	C	C	C	C	C	C	C	C	C	C	C	C	C	C	C	C
Y	14347418	1 to 17	A	T	A	T	A	T	A	A	A	A	A	A	A	A	A	A	A	A	A	A	A	A
Y	14347661	1 to 17	T	A	T	A	T	A	T	T	T	T	T	T	T	T	T	T	T	T	T	T	T	T
Y	14347721	3 to 15	C	A	C	C	C	C	A	C	C	C	C	C	C	C	C	A	A	C	C	C	C	C
Y	14347835	4 to 12	C	T	C	C	C	C	C	C	C	C	C	T	T	T	T	C	C	C	C	C	C	C
Y	14347955	2 to PTT_Vaillant	T	C	T	T	T	T	T	T	T	T	T	T	T	T	T	T	T	C	T	T	T	T
Y	14348113	1 to ancestral; 1 to 17; 2 to 3; 2 to PTT_Vaillant	T	A	T	A	A	A	A	A	A	A	A	A	A	A	A	A	A	T	A	A	A	A
Y	14349589	1 to 2	C	A	C	C	A	C	A	A	A	A	A	A	A	A	A	A	A	A	A	A	A	A
Y	14353296	1 to 17	G	C	G	C	G	C	G	G	G	G	G	G	G	G	G	G	G	G	G	G	G	G
Y	14353329	3 to 15	C	A	C	C	C	C	A	C	C	C	C	C	C	C	C	A	A	C	C	C	C	C
Y	14353330	3 to 15	T	G	T	T	T	T	G	T	T	T	T	T	T	T	T	G	G	T	T	T	T	T
Y	14353758	4 to 5	T	C	T	T	C	T	T	C	C	C	C	T	T	T	T	T	T	T	C	C	C	C
Y	14354019	1 to 17	A	G	A	G	A	G	A	A	A	A	A	A	A	A	A	A	A	A	A	A	A	A
Y	14354815	1 to 17	A	C	A	C	A	C	A	A	A	A	A	A	A	A	A	A	A	A	A	A	A	A
Y	14355282	1 to 2	T	G	T	T	G	T	G	G	G	G	G	G	G	G	G	G	G	G	G	G	G	G
Y	14355420	1 to 17	G	A	A	G	A	G	A	A	A	A	A	A	A	A	A	A	A	A	A	A	A	A
Y	14355495	1 to 2	C	T	C	C	T	C	T	T	T	T	T	T	T	T	T	T	T	T	T	T	T	T
Y	14359473	5 to 6	T	C	T	T	C	T	T	C	T	C	T	T	T	T	T	T	T	T	C	T	C	C
Y	14359568	1 to 17	A	C	A	C	A	C	A	A	A	A	A	A	A	A	A	A	A	A	A	A	A	A
Y	14359631	1 to 17	A	T	A	T	A	T	A	A	A	A	A	A	A	A	A	A	A	A	A	A	A	A
Y	14362286	1 to 17	T	C	T	C	T	C	T	T	T	T	T	T	T	T	T	T	T	T	T	T	T	T
Y	14362420	1 to 17	C	T	C	T	C	T	C	C	C	C	C	C	C	C	C	C	C	C	C	C	C	C
Y	14363560	1 to 17	G	A	G	A	G	A	G	G	G	G	G	G	G	G	G	G	G	G	G	G	G	G
Y	14363782	1 to 17	T	C	C	T	C	T	C	C	C	C	C	C	C	C	C	C	C	C	C	C	C	C
Y	14365251	1 to 2	G	A	G	G	A	G	A	A	A	A	A	A	A	A	A	A	A	A	A	A	A	A
Y	14374361	2 to PTT_Vaillant	T	C	T	T	T	T	T	T	T	T	T	T	T	T	T	T	T	C	T	T	T	T
Y	14374368	1 to 17	G	T	G	T	G	T	G	G	G	G	G	G	G	G	G	G	G	G	G	G	G	G
Y	14374408	2 to 3	C	A	C	C	A	C	A	A	A	A	A	A	A	A	A	A	A	C	A	A	A	A
Y	14374455	1 to 17	G	A	G	A	G	A	G	G	G	G	G	G	G	G	G	G	G	G	G	G	G	G
Y	14374712	1 to 17	C	T	C	T	C	T	C	C	C	C	C	C	C	C	C	C	C	C	C	C	C	C
Y	14374945	1 to 17	C	T	C	T	C	T	C	C	C	C	C	C	C	C	C	C	C	C	C	C	C	C
Y	14376404	3 to 15	A	C	A	A	A	A	C	A	A	A	A	A	A	A	A	C	C	A	A	A	A	A
Y	14376989	4 to 5	T	A	T	T	A	T	T	A	A	A	A	T	T	T	T	T	T	T	A	A	A	A
Y	14377103	4 to 5	C	T	C	C	T	C	C	T	T	T	T	C	C	C	C	C	C	C	T	T	T	T
Y	14378481	1 to 2	C	G,A	A	A	G	A	G	G	G	G	G	G	G	G	G	G	G	G	G	G	G	G
Y	14380384	1 to 17	T	A	T	A	T	A	T	T	T	T	T	T	T	T	T	T	T	T	T	T	T	T
[truncated: 10,210 more rows]

## Sheet: TableS11
Supplemental Table S11: MSY variant sites and genotypes in gorillas according to human genome reference (GRCh37/hg19)
CHROM	POS	Branch	REF	ALT	Ancestral	GGG_Fritz	GGG_Guy	GGG_Nikumba	GBG_Mkubw	GBG_Kaisi	GGG_Azizi	GGG_Banjo	GGG_Abe	GGG_Tzamb	GBB_Imfur	GBB_Kabok	GBB_Zirika	GBG_Ntabw
Y	2658905	9 to 10	C	T	C	T	C	C	C	C	C	C	T	C	C	C	C	C	#REF!
Y	2659192	1 to 2	G	A	G	G	G	G	A	A	G	G	G	G	A	A	A	A	#REF!
Y	2686734	8 to GGG_Nikumba	C	A	C	C	C	A	C	C	C	C	C	C	C	C	C	C	#REF!
Y	2687598	1 to 2	T	C	T	T	T	T	C	C	T	T	T	T	C	C	C	C	#REF!
Y	2691516	9 to 10	G	C	G	C	G	G	G	G	G	G	C	G	G	G	G	G	#REF!
Y	2712573	2 to 3	G	T,C	T	T	T	T	C	T	T	T	T	T	C	C	C	T	#REF!
Y	2714517	6 to 9	T	C	T	C	C	T	T	T	T	C	C	T	T	T	T	T	#REF!
Y	2715021	1 to 2	A	G	A	A	A	A	G	G	A	A	A	A	G	G	G	G	#REF!
Y	2720566	9 to 10	G	A	G	A	G	G	G	G	G	G	A	G	G	G	G	G	#REF!
Y	2727793	2 to 3	A	G	A	A	A	A	G	A	A	A	A	A	G	G	G	A	#REF!
Y	2730803	7 to GGG_Tzambo	G	C	G	G	G	G	G	G	G	G	G	C	G	G	G	G	#REF!
Y	2737559	1 to 2	T	G	T	T	T	T	G	G	T	T	T	T	G	G	G	G	#REF!
Y	2738257	1 to 6	C	G,T	T	G	G	G	T	T	G	G	G	G	T	T	T	T	#REF!
Y	2739480	9 to 10	A	C	A	C	A	A	A	A	A	A	C	A	A	A	A	A	#REF!
Y	2742691	1 to ancestral; 1 to 6; 2 to 3; 2 to 5	A	G	A	G	G	G	A	G	G	G	G	G	A	A	A	G	#REF!
Y	2746965	7 to 8	T	C	T	T	T	C	T	T	C	T	T	T	T	T	T	T	#REF!
Y	2747481	1 to 2	A	G	A	A	A	A	G	G	A	A	A	A	G	G	G	G	#REF!
Y	2748003	9 to 11	G	C	G	G	C	G	G	G	G	C	G	G	G	G	G	G	#REF!
Y	2748074	1 to 2	A	G	A	A	A	A	G	G	A	A	A	A	G	G	G	G	#REF!
Y	2750697	7 to GGG_Tzambo	T	G	T	T	T	T	T	T	T	T	T	G	T	T	T	T	#REF!
Y	2764048	7 to GGG_Tzambo	T	G	T	T	T	T	T	T	T	T	T	G	T	T	T	T	#REF!
Y	2764358	5 to GBG_Ntabwoba	T	C	T	T	T	T	T	T	T	T	T	T	T	T	T	C	#REF!
Y	2774220	9 to 10	A	G	A	G	A	A	A	A	A	A	G	A	A	A	A	A	#REF!
Y	2774347	1 to 6	C	T	C	T	T	T	C	C	T	T	T	T	C	C	C	C	#REF!
Y	2774348	1 to 6	T	A,C	C	A	A	A	C	C	A	A	A	A	C	C	C	C	#REF!
Y	2775558	6 to 9	T	G	T	G	G	T	T	T	T	G	G	T	T	T	T	T	#REF!
Y	2778002	6 to 9	A	T	A	T	T	A	A	A	A	T	T	A	A	A	A	A	#REF!
Y	2783795	9 to 11	C	A	C	C	A	C	C	C	C	A	C	C	C	C	C	C	#REF!
Y	2783796	9 to 11	A	G	A	A	G	A	A	A	A	G	A	A	A	A	A	A	#REF!
Y	2795317	1 to 6	A	T	A	T	T	T	A	A	T	T	T	T	A	A	A	A	#REF!
Y	2795780	2 to 3	G	T	G	G	G	G	T	G	G	G	G	G	T	T	T	G	#REF!
Y	2795992	9 to 10	T	C	T	C	T	T	T	T	T	T	C	T	T	T	T	T	#REF!
Y	2796115	1 to 6	C	T	C	T	T	T	C	C	T	T	T	T	C	C	C	C	#REF!
Y	2796867	6 to 9	A	T	A	T	T	A	A	A	A	T	T	A	A	A	A	A	#REF!
Y	2796892	1 to 6	G	A	G	A	A	A	G	G	A	A	A	A	G	G	G	G	#REF!
Y	2797043	5 to GBG_Ntabwoba	T	C	T	T	T	T	T	T	T	T	T	T	T	T	T	C	#REF!
Y	2797921	7 to GGG_Tzambo	T	C	T	T	T	T	T	T	T	T	T	C	T	T	T	T	#REF!
Y	2804465	2 to 5	G	C	G	G	G	G	G	C	G	G	G	G	G	G	G	C	#REF!
Y	2804761	1 to 2	T	C	T	T	T	T	C	C	T	T	T	T	C	C	C	C	#REF!
Y	2808573	9 to 10	T	G	T	G	T	T	T	T	T	T	G	T	T	T	T	T	#REF!
Y	2810968	7 to GGG_Tzambo	A	G	A	A	A	A	A	A	A	A	A	G	A	A	A	A	#REF!
Y	2811834	7 to 8	A	G	A	A	A	G	A	A	G	A	A	A	A	A	A	A	#REF!
Y	2815579	9 to 11	A	G	A	A	G	A	A	A	A	G	A	A	A	A	A	A	#REF!
Y	2818896	1 to 2	C	T	C	C	C	C	T	T	C	C	C	C	T	T	T	T	#REF!
Y	2829700	9 to 11	G	C	G	G	C	G	G	G	G	C	G	G	G	G	G	G	#REF!
Y	2829886	1 to 6	A	G	A	G	G	G	A	A	G	G	G	G	A	A	A	A	#REF!
Y	2832342	9 to 10	T	C	T	C	T	T	T	T	T	T	C	T	T	T	T	T	#REF!
Y	2838388	1 to 2	G	T	G	G	G	G	T	T	G	G	G	G	T	T	T	T	#REF!
Y	2843081	9 to 10	T	C	T	C	T	T	T	T	T	T	C	T	T	T	T	T	#REF!
Y	2862272	1 to 6	T	C	T	C	C	C	T	T	C	C	C	C	T	T	T	T	#REF!
Y	2863064	1 to 2	C	T	C	C	C	C	T	T	C	C	C	C	T	T	T	T	#REF!
Y	2887416	2 to 3	C	T	C	C	C	C	T	C	C	C	C	C	T	T	T	C	#REF!
Y	2908411	6 to 9	C	G	C	G	G	C	C	C	C	G	G	C	C	C	C	C	#REF!
Y	2913615	1 to 6	G	C	G	C	C	C	G	G	C	C	C	C	G	G	G	G	#REF!
Y	6627642	9 to 10	G	A	G	A	G	G	G	G	G	G	A	G	G	G	G	G	#REF!
Y	6632425	6 to 7	G	T	G	G	G	T	G	G	T	G	G	T	G	G	G	G	#REF!
Y	6637133	1 to 6	A	G	A	G	G	G	A	A	G	G	G	G	A	A	A	A	#REF!
Y	6676791	11 to GGG_Guy	C	T	C	C	T	C	C	C	C	C	C	C	C	C	C	C	#REF!
Y	6679021	7 to 8	A	C	A	A	A	C	A	A	C	A	A	A	A	A	A	A	#REF!
Y	6679531	1 to 2	A	G	A	A	A	A	G	G	A	A	A	A	G	G	G	G	#REF!
Y	6680682	7 to GGG_Tzambo	T	A	T	T	T	T	T	T	T	T	T	A	T	T	T	T	#REF!
Y	6698224	1 to 2	G	A	G	G	G	G	A	A	G	G	G	G	A	A	A	A	#REF!
Y	6701452	1 to 2	A	G	A	A	A	A	G	G	A	A	A	A	G	G	G	G	#REF!
Y	6719213	6 to 9	T	C	T	C	C	T	T	T	T	C	C	T	T	T	T	T	#REF!
Y	6734876	3 to 4	T	C	T	T	T	T	T	T	T	T	T	T	C	C	C	T	#REF!
Y	6740379	9 to 11	A	G	A	A	G	A	A	A	A	G	A	A	A	A	A	A	#REF!
Y	6758335	8 to GGG_Azizi	T	C	T	T	T	T	T	T	C	T	T	T	T	T	T	T	#REF!
Y	6765207	2 to 5	G	T	G	G	G	G	G	T	G	G	G	G	G	G	G	T	#REF!
Y	6765208	2 to 5	C	T	C	C	C	C	C	T	C	C	C	C	C	C	C	T	#REF!
Y	6767097	2 to 3	G	A	G	G	G	G	A	G	G	G	G	G	A	A	A	G	#REF!
Y	6768994	9 to 11	C	T	C	C	T	C	C	C	C	T	C	C	C	C	C	C	#REF!
Y	6769086	6 to 9	A	G	A	G	G	A	A	A	A	G	G	A	A	A	A	A	#REF!
Y	6776704	9 to 11	A	G	A	A	G	A	A	A	A	G	A	A	A	A	A	A	#REF!
Y	6786756	11 to GGG_Banjo	C	T	C	C	C	C	C	C	C	T	C	C	C	C	C	C	#REF!
Y	6787075	1 to 6	A	G	G	A	A	A	G	G	A	A	A	A	G	G	G	G	#REF!
Y	6792445	1 to 2	C	T	C	C	C	C	T	T	C	C	C	C	T	T	T	T	#REF!
Y	6793351	2 to 5	C	A	C	C	C	C	C	A	C	C	C	C	C	C	C	A	#REF!
Y	6793929	9 to 10	C	G	C	G	C	C	C	C	C	C	G	C	C	C	C	C	#REF!
Y	6795845	1 to 2	A	C	A	A	A	A	C	C	A	A	A	A	C	C	C	C	#REF!
Y	6799372	1 to ancestral; 1 to 6; 2 to 3; 2 to 5	A	G	A	G	G	G	A	G	G	G	G	G	A	A	A	G	#REF!
Y	6801717	3 to GBG_Mkubwa; 5 to GBG_Kaisi	C	A	C	C	C	C	A	A	C	C	C	C	C	C	C	C	#REF!
Y	6802343	9 to 10	G	A	G	A	G	G	G	G	G	G	A	G	G	G	G	G	#REF!
Y	6806411	1 to 2	T	C	T	T	T	T	C	C	T	T	T	T	C	C	C	C	#REF!
Y	6809018	7 to GGG_Tzambo	G	A	G	G	G	G	G	G	G	G	G	A	G	G	G	G	#REF!
Y	6809478	6 to 9	C	A	C	A	A	C	C	C	C	A	A	C	C	C	C	C	#REF!
Y	6811981	6 to 7	C	T	C	C	C	T	C	C	T	C	C	T	C	C	C	C	#REF!
Y	6871138	1 to 6	A	G	A	G	G	G	A	A	G	G	G	G	A	A	A	A	#REF!
Y	6872373	9 to 10	C	T	C	T	C	C	C	C	C	C	T	C	C	C	C	C	#REF!
Y	6872496	9 to 11	C	T	C	C	T	C	C	C	C	T	C	C	C	C	C	C	#REF!
Y	6872500	9 to 10	C	A	C	A	C	C	C	C	C	C	A	C	C	C	C	C	#REF!
Y	6873367	6 to 9	G	A	G	A	A	G	G	G	G	A	A	G	G	G	G	G	#REF!
Y	6875758	7 to GGG_Tzambo	G	T	G	G	G	G	G	G	G	G	G	T	G	G	G	G	#REF!
Y	6876709	2 to 3	G	C	G	G	G	G	C	G	G	G	G	G	C	C	C	G	#REF!
Y	6877269	6 to 9	C	T	C	T	T	C	C	C	C	T	T	C	C	C	C	C	#REF!
Y	6877627	9 to 11	C	T	C	C	T	C	C	C	C	T	C	C	C	C	C	C	#REF!
Y	6877640	9 to 10	T	A	T	A	T	T	T	T	T	T	A	T	T	T	T	T	#REF!
Y	6879816	1 to 2	T	C	T	T	T	T	C	C	T	T	T	T	C	C	C	C	#REF!
Y	6880495	9 to 11	G	A	G	G	A	G	G	G	G	A	G	G	G	G	G	G	#REF!
Y	6883336	9 to 11	C	T	C	C	T	C	C	C	C	T	C	C	C	C	C	C	#REF!
Y	6883917	7 to 8	A	G	A	A	A	G	A	A	G	A	A	A	A	A	A	A	#REF!
Y	6886824	2 to 5	T	C	T	T	T	T	T	C	T	T	T	T	T	T	T	C	#REF!
Y	6887511	1 to 6	G	A	G	A	A	A	G	G	A	A	A	A	G	G	G	G	#REF!
Y	6891516	2 to 3	G	T	G	G	G	G	T	G	G	G	G	G	T	T	T	G	#REF!
Y	6899686	9 to 11	G	A	G	G	A	G	G	G	G	A	G	G	G	G	G	G	#REF!
Y	6904541	1 to 6	C	T	C	T	T	T	C	C	T	T	T	T	C	C	C	C	#REF!
Y	6907374	6 to 9	C	A	C	A	A	C	C	C	C	A	A	C	C	C	C	C	#REF!
Y	6908857	9 to 10	G	C	G	C	G	G	G	G	G	G	C	G	G	G	G	G	#REF!
Y	6909518	9 to 11	C	T	C	C	T	C	C	C	C	T	C	C	C	C	C	C	#REF!
Y	6912965	9 to 10	A	G	A	G	A	A	A	A	A	A	G	A	A	A	A	A	#REF!
Y	6913390	1 to 2	C	G	C	C	C	C	G	G	C	C	C	C	G	G	G	G	#REF!
Y	6931851	2 to 3	C	T	C	C	C	C	T	C	C	C	C	C	T	T	T	C	#REF!
Y	6933446	2 to 5	T	C	T	T	T	T	T	C	T	T	T	T	T	T	T	C	#REF!
Y	6933937	9 to 10	C	G	C	G	C	C	C	C	C	C	G	C	C	C	C	C	#REF!
Y	6933949	1 to 2	T	A	T	T	T	T	A	A	T	T	T	T	A	A	A	A	#REF!
Y	6935145	11 to GGG_Banjo	C	A	C	C	C	C	C	C	C	A	C	C	C	C	C	C	#REF!
Y	6942007	9 to 11	C	T	C	C	T	C	C	C	C	T	C	C	C	C	C	C	#REF!
Y	6942056	1 to 2	A	T	A	A	A	A	T	T	A	A	A	A	T	T	T	T	#REF!
Y	6945702	9 to 10	C	T	C	T	C	C	C	C	C	C	T	C	C	C	C	C	#REF!
Y	6950526	7 to 8	C	T	C	C	C	T	C	C	T	C	C	C	C	C	C	C	#REF!
Y	6954120	10 to GGG_Fritz	C	T	C	T	C	C	C	C	C	C	C	C	C	C	C	C	#REF!
Y	6956189	6 to 9	G	A	G	A	A	G	G	G	G	A	A	G	G	G	G	G	#REF!
Y	6957143	7 to 8	C	T	C	C	C	T	C	C	T	C	C	C	C	C	C	C	#REF!
Y	6958510	9 to 10	G	A	G	A	G	G	G	G	G	G	A	G	G	G	G	G	#REF!
Y	6959168	7 to GGG_Tzambo	G	T	G	G	G	G	G	G	G	G	G	T	G	G	G	G	#REF!
Y	6960158	9 to 10	C	T	C	T	C	C	C	C	C	C	T	C	C	C	C	C	#REF!
Y	6961649	6 to 7	A	G	A	A	A	G	A	A	G	A	A	G	A	A	A	A	#REF!
Y	6963485	7 to 8	G	A	G	G	G	A	G	G	A	G	G	G	G	G	G	G	#REF!
Y	6964766	7 to GGG_Tzambo	A	G	A	A	A	A	A	A	A	A	A	G	A	A	A	A	#REF!
Y	6969302	2 to 5	T	C	C	C	C	C	C	T	C	C	C	C	C	C	C	T	#REF!
Y	6973878	9 to 10	G	C	G	C	G	G	G	G	G	G	C	G	G	G	G	G	#REF!
Y	6981838	1 to ancestral; 8 to GGG_Nikumba	G	A	G	A	A	G	A	A	A	A	A	A	A	A	A	A	#REF!
Y	6997076	10 to GGG_Fritz	A	G	A	G	A	A	A	A	A	A	A	A	A	A	A	A	#REF!
Y	7009724	11 to GGG_Banjo	A	G	A	A	A	A	A	A	A	G	A	A	A	A	A	A	#REF!
Y	7016897	6 to 9	A	G	A	G	G	A	A	A	A	G	G	A	A	A	A	A	#REF!
Y	7018185	1 to 2	T	C	T	T	T	T	C	C	T	T	T	T	C	C	C	C	#REF!
Y	7031901	1 to 2	G	A	G	G	G	G	A	A	G	G	G	G	A	A	A	A	#REF!
Y	7034679	9 to 10	A	G	A	G	A	A	A	A	A	A	G	A	A	A	A	A	#REF!
Y	7034920	2 to 5	C	T	C	C	C	C	C	T	C	C	C	C	C	C	C	T	#REF!
Y	7056679	1 to 6	C	T	C	T	T	T	C	C	T	T	T	T	C	C	C	C	#REF!
Y	7057321	1 to 2	A	G	A	A	A	A	G	G	A	A	A	A	G	G	G	G	#REF!
Y	7064930	9 to 10	T	C	T	C	T	T	T	T	T	T	C	T	T	T	T	T	#REF!
Y	7075466	1 to 2	C	G	C	C	C	C	G	G	C	C	C	C	G	G	G	G	#REF!
Y	7077960	7 to GGG_Tzambo	G	A	G	G	G	G	G	G	G	G	G	A	G	G	G	G	#REF!
Y	7079028	9 to 10	G	T	G	T	G	G	G	G	G	G	T	G	G	G	G	G	#REF!
Y	7079278	1 to 2	T	C	T	T	T	T	C	C	T	T	T	T	C	C	C	C	#REF!
Y	7079969	2 to 3	C	T	C	C	C	C	T	C	C	C	C	C	T	T	T	C	#REF!
Y	7079976	2 to 3	A	G	A	A	A	A	G	A	A	A	A	A	G	G	G	A	#REF!
Y	7080251	9 to 10	T	C	T	C	T	T	T	T	T	T	C	T	T	T	T	T	#REF!
Y	7082615	1 to 2	T	C	T	T	T	T	C	C	T	T	T	T	C	C	C	C	#REF!
Y	7083068	6 to 9	T	A	T	A	A	T	T	T	T	A	A	T	T	T	T	T	#REF!
Y	7091303	1 to 6	C	T	C	T	T	T	C	C	T	T	T	T	C	C	C	C	#REF!
Y	7092946	2 to 5	C	A	C	C	C	C	C	A	C	C	C	C	C	C	C	A	#REF!
Y	7095880	2 to 5	T	A	T	T	T	T	T	A	T	T	T	T	T	T	T	A	#REF!
Y	7105623	1 to 2	C	G	C	C	C	C	G	G	C	C	C	C	G	G	G	G	#REF!
Y	7106488	7 to 8	C	A	C	C	C	A	C	C	A	C	C	C	C	C	C	C	#REF!
Y	7106562	1 to 6	G	C	G	C	C	C	G	G	C	C	C	C	G	G	G	G	#REF!
Y	7106891	8 to GGG_Azizi	A	C	A	A	A	A	A	A	C	A	A	A	A	A	A	A	#REF!
Y	7108749	7 to 8	C	T	C	C	C	T	C	C	T	C	C	C	C	C	C	C	#REF!
Y	7138394	8 to GGG_Azizi	C	T	C	C	C	C	C	C	T	C	C	C	C	C	C	C	#REF!
Y	7147530	11 to GGG_Banjo	T	A	T	T	T	T	T	T	T	A	T	T	T	T	T	T	#REF!
Y	7151297	2 to 5	G	A	G	G	G	G	G	A	G	G	G	G	G	G	G	A	#REF!
Y	7159034	7 to 8	G	A	G	G	G	A	G	G	A	G	G	G	G	G	G	G	#REF!
Y	7184298	7 to GGG_Tzambo	T	A	T	T	T	T	T	T	T	T	T	A	T	T	T	T	#REF!
Y	7186899	9 to 11	G	A	G	G	A	G	G	G	G	A	G	G	G	G	G	G	#REF!
Y	7191489	9 to 10	A	G	A	G	A	A	A	A	A	A	G	A	A	A	A	A	#REF!
Y	7193402	11 to GGG_Banjo	T	G	T	T	T	T	T	T	T	G	T	T	T	T	T	T	#REF!
Y	7194931	2 to 5	C	T	C	C	C	C	C	T	C	C	C	C	C	C	C	T	#REF!
Y	7195154	1 to 2	G	A	G	G	G	G	A	A	G	G	G	G	A	A	A	A	#REF!
Y	7196730	1 to 2	A	G	A	A	A	A	G	G	A	A	A	A	G	G	G	G	#REF!
Y	7200554	10 to GGG_Fritz	C	T	C	T	C	C	C	C	C	C	C	C	C	C	C	C	#REF!
Y	7202740	7 to 8	T	G	T	T	T	G	T	T	G	T	T	T	T	T	T	T	#REF!
Y	7207683	9 to 10	C	T	C	T	C	C	C	C	C	C	T	C	C	C	C	C	#REF!
Y	7207893	7 to GGG_Tzambo	C	G	C	C	C	C	C	C	C	C	C	G	C	C	C	C	#REF!
Y	7210823	8 to GGG_Azizi	C	T	C	C	C	C	C	C	T	C	C	C	C	C	C	C	#REF!
Y	7210830	7 to GGG_Tzambo	A	G	A	A	A	A	A	A	A	A	A	G	A	A	A	A	#REF!
Y	7242196	7 to 8	C	T	C	C	C	T	C	C	T	C	C	C	C	C	C	C	#REF!
Y	7242258	9 to 11	G	A	G	G	A	G	G	G	G	A	G	G	G	G	G	G	#REF!
Y	7243826	1 to 2	C	T	C	C	C	C	T	T	C	C	C	C	T	T	T	T	#REF!
Y	7272174	11 to GGG_Guy	A	T	A	A	T	A	A	A	A	A	A	A	A	A	A	A	#REF!
Y	7284557	9 to 10	G	C	G	C	G	G	G	G	G	G	C	G	G	G	G	G	#REF!
Y	7284782	1 to 2	C	T	C	C	C	C	T	T	C	C	C	C	T	T	T	T	#REF!
Y	7286680	9 to 11	C	T	C	C	T	C	C	C	C	T	C	C	C	C	C	C	#REF!
Y	7314253	8 to GGG_Azizi	A	T	A	A	A	A	A	A	T	A	A	A	A	A	A	A	#REF!
Y	7315494	7 to 8	A	G	A	A	A	G	A	A	G	A	A	A	A	A	A	A	#REF!
Y	7322190	9 to 10	C	T	C	T	C	C	C	C	C	C	T	C	C	C	C	C	#REF!
Y	7325724	2 to 5	A	G	A	A	A	A	A	G	A	A	A	A	A	A	A	G	#REF!
Y	7326050	9 to 10	C	G,A	G	A	G	G	G	G	G	G	A	G	G	G	G	G	#REF!
Y	7326069	1 to 2	A	G	A	A	A	A	G	G	A	A	A	A	G	G	G	G	#REF!
Y	7326335	9 to 10	A	G	A	G	A	A	A	A	A	A	G	A	A	A	A	A	#REF!
Y	7326751	7 to GGG_Tzambo	G	A	G	G	G	G	G	G	G	G	G	A	G	G	G	G	#REF!
Y	7329340	9 to 10	G	A	G	A	G	G	G	G	G	G	A	G	G	G	G	G	#REF!
Y	7333430	1 to 2	C	T	C	C	C	C	T	T	C	C	C	C	T	T	T	T	#REF!
Y	7333716	7 to GGG_Tzambo	C	T	C	C	C	C	C	C	C	C	C	T	C	C	C	C	#REF!
Y	7349739	7 to GGG_Tzambo	C	A	C	C	C	C	C	C	C	C	C	A	C	C	C	C	#REF!
Y	7352578	7 to GGG_Tzambo	T	G,A	G	G	G	G	G	G	G	G	G	A	G	G	G	G	#REF!
Y	7356675	7 to 8	T	C	T	T	T	C	T	T	C	T	T	T	T	T	T	T	#REF!
Y	7361828	2 to 3	G	A	G	G	G	G	A	G	G	G	G	G	A	A	A	G	#REF!
Y	7366847	9 to 11	T	C	T	T	C	T	T	T	T	C	T	T	T	T	T	T	#REF!
Y	7378320	1 to ancestral; 1 to 2; 6 to 7; 6 to 9	T	C	T	T	T	C	C	C	C	T	T	C	C	C	C	C	#REF!
Y	7381956	2 to 5	G	A	G	G	G	G	G	A	G	G	G	G	G	G	G	A	#REF!
Y	7386840	1 to 6	A	T	A	T	T	T	A	A	T	T	T	T	A	A	A	A	#REF!
Y	7396428	1 to ancestral; 7 to 8	T	C	T	C	C	T	C	C	T	C	C	C	C	C	C	C	#REF!
Y	7398183	9 to 10	G	T	G	T	G	G	G	G	G	G	T	G	G	G	G	G	#REF!
Y	7416372	1 to 2	C	T	C	C	C	C	T	T	C	C	C	C	T	T	T	T	#REF!
Y	7420874	9 to 10	C	T	C	T	C	C	C	C	C	C	T	C	C	C	C	C	#REF!
Y	7421540	1 to 6	C	G	C	G	G	G	C	C	G	G	G	G	C	C	C	C	#REF!
Y	7426011	7 to 8	C	A	C	C	C	A	C	C	A	C	C	C	C	C	C	C	#REF!
Y	7430298	2 to 5	C	T	C	C	C	C	C	T	C	C	C	C	C	C	C	T	#REF!
Y	7430940	1 to ancestral; 7 to 8	A	G	A	G	G	A	G	G	A	G	G	G	G	G	G	G	#REF!
Y	7435895	11 to GGG_Banjo	G	A	G	G	G	G	G	G	G	A	G	G	G	G	G	G	#REF!
Y	7437711	7 to GGG_Tzambo	G	A	G	G	G	G	G	G	G	G	G	A	G	G	G	G	#REF!
Y	13885156	1 to 2; 2 to 5; 3 to 4; 3 to GBG_Mkubwa	T	A	T	T	T	T	A	A	T	T	T	T	T	T	T	A	#REF!
Y	13989622	9 to 11	G	A	G	G	A	G	G	G	G	A	G	G	G	G	G	G	#REF!
Y	13990682	1 to 2	C	T	C	C	C	C	T	T	C	C	C	C	T	T	T	T	#REF!
Y	13992540	2 to 3	T	G,C	G	G	G	G	C	G	G	G	G	G	C	C	C	G	#REF!
Y	14017611	1 to ancestral; 1 to 6; 2 to 3; 2 to 5	A	G	A	G	G	G	A	G	G	G	G	G	A	A	A	G	#REF!
Y	14017894	1 to 2	G	A	G	G	G	G	A	A	G	G	G	G	A	A	A	A	#REF!
Y	14026494	9 to 11	T	A	T	T	A	T	T	T	T	A	T	T	T	T	T	T	#REF!
Y	14027918	9 to 11	G	A	G	G	A	G	G	G	G	A	G	G	G	G	G	G	#REF!
Y	14028185	1 to 6	G	C	C	G	G	G	C	C	G	G	G	G	C	C	C	C	#REF!
Y	14029377	9 to 11	G	A	G	G	A	G	G	G	G	A	G	G	G	G	G	G	#REF!
Y	14035482	1 to 2	G	A	G	G	G	G	A	A	G	G	G	G	A	A	A	A	#REF!
Y	14038696	7 to GGG_Tzambo	G	C	G	G	G	G	G	G	G	G	G	C	G	G	G	G	#REF!
Y	14044324	2 to 5	G	T	G	G	G	G	G	T	G	G	G	G	G	G	G	T	#REF!
Y	14045964	7 to GGG_Tzambo	T	G	T	T	T	T	T	T	T	T	T	G	T	T	T	T	#REF!
Y	14061008	1 to 6	A	T	A	T	T	T	A	A	T	T	T	T	A	A	A	A	#REF!
Y	14061193	7 to GGG_Tzambo	G	A	G	G	G	G	G	G	G	G	G	A	G	G	G	G	#REF!
Y	14063352	1 to 2	C	G	C	C	C	C	G	G	C	C	C	C	G	G	G	G	#REF!
Y	14064905	1 to 2	G	T	G	G	G	G	T	T	G	G	G	G	T	T	T	T	#REF!
Y	14066432	1 to 2	A	T	A	A	A	A	T	T	A	A	A	A	T	T	T	T	#REF!
Y	14066498	1 to 2	T	A	T	T	T	T	A	A	T	T	T	T	A	A	A	A	#REF!
Y	14068505	7 to 8	G	A	G	G	G	A	G	G	A	G	G	G	G	G	G	G	#REF!
Y	14069768	7 to GGG_Tzambo	T	C	T	T	T	T	T	T	T	T	T	C	T	T	T	T	#REF!
Y	14076783	9 to 10	T	G,C	G	C	G	G	G	G	G	G	C	G	G	G	G	G	#REF!
Y	14084590	2 to 3	G	A	G	G	G	G	A	G	G	G	G	G	A	A	A	G	#REF!
Y	14084859	1 to 2	T	C	T	T	T	T	C	C	T	T	T	T	C	C	C	C	#REF!
Y	14091319	2 to 5	G	T	G	G	G	G	G	T	G	G	G	G	G	G	G	T	#REF!
Y	14091564	7 to 8	C	T	C	C	C	T	C	C	T	C	C	C	C	C	C	C	#REF!
Y	14091762	7 to 8	C	T	C	C	C	T	C	C	T	C	C	C	C	C	C	C	#REF!
Y	14094908	2 to 3	G	T	G	G	G	G	T	G	G	G	G	G	T	T	T	G	#REF!
Y	14106130	9 to 10	G	A	G	A	G	G	G	G	G	G	A	G	G	G	G	G	#REF!
Y	14106759	9 to 10	A	T	A	T	A	A	A	A	A	A	T	A	A	A	A	A	#REF!
Y	14108951	7 to GGG_Tzambo	A	G	A	A	A	A	A	A	A	A	A	G	A	A	A	A	#REF!
Y	14115642	7 to 8	T	C	T	T	T	C	T	T	C	T	T	T	T	T	T	T	#REF!
Y	14115716	9 to 11	C	T	C	C	T	C	C	C	C	T	C	C	C	C	C	C	#REF!
Y	14124696	7 to GGG_Tzambo	T	A	T	T	T	T	T	T	T	T	T	A	T	T	T	T	#REF!
Y	14124957	1 to 2	A	C,G	C	C	C	C	G	G	C	C	C	C	G	G	G	G	#REF!
Y	14127917	2 to 5	T	C	T	T	T	T	T	C	T	T	T	T	T	T	T	C	#REF!
Y	14128142	9 to 11	G	A	G	G	A	G	G	G	G	A	G	G	G	G	G	G	#REF!
Y	14137421	9 to 10	G	T	G	T	G	G	G	G	G	G	T	G	G	G	G	G	#REF!
Y	14144868	7 to GGG_Tzambo	T	C	T	T	T	T	T	T	T	T	T	C	T	T	T	T	#REF!
Y	14144874	1 to ancestral; 7 to GGG_Tzambo	C	T	C	T	T	T	T	T	T	T	T	C	T	T	T	T	#REF!
Y	14145387	9 to 11	C	T	C	C	T	C	C	C	C	T	C	C	C	C	C	C	#REF!
Y	14148349	7 to GGG_Tzambo	A	G	A	A	A	A	A	A	A	A	A	G	A	A	A	A	#REF!
Y	14150241	1 to 6	G	C	G	C	C	C	G	G	C	C	C	C	G	G	G	G	#REF!
Y	14169003	1 to 2	T	C	T	T	T	T	C	C	T	T	T	T	C	C	C	C	#REF!
Y	14171670	1 to 2	A	G	A	A	A	A	G	G	A	A	A	A	G	G	G	G	#REF!
Y	14172168	7 to 8	T	C	T	T	T	C	T	T	C	T	T	T	T	T	T	T	#REF!
Y	14177932	11 to GGG_Guy	A	G	G	G	A	G	G	G	G	G	G	G	G	G	G	G	#REF!
Y	14183752	1 to 6	C	G	C	G	G	G	C	C	G	G	G	G	C	C	C	C	#REF!
Y	14185293	1 to 6	A	C	A	C	C	C	A	A	C	C	C	C	A	A	A	A	#REF!
Y	14186306	1 to 2	T	C	T	T	T	T	C	C	T	T	T	T	C	C	C	C	#REF!
Y	14188191	2 to 3	C	T	C	C	C	C	T	C	C	C	C	C	T	T	T	C	#REF!
Y	14188565	2 to 3	A	G	A	A	A	A	G	A	A	A	A	A	G	G	G	A	#REF!
Y	14188683	2 to 3	T	A	T	T	T	T	A	T	T	T	T	T	A	A	A	T	#REF!
Y	14190127	2 to 5	A	G	A	A	A	A	A	G	A	A	A	A	A	A	A	G	#REF!
Y	14197099	2 to 5	C	T	C	C	C	C	C	T	C	C	C	C	C	C	C	T	#REF!
Y	14200672	9 to 10	C	T	C	T	C	C	C	C	C	C	T	C	C	C	C	C	#REF!
Y	14206230	9 to 10	T	C	T	C	T	T	T	T	T	T	C	T	T	T	T	T	#REF!
Y	14206519	1 to 2	A	G	A	A	A	A	G	G	A	A	A	A	G	G	G	G	#REF!
Y	14208374	9 to 10	G	A	G	A	G	G	G	G	G	G	A	G	G	G	G	G	#REF!
Y	14211381	11 to GGG_Banjo	G	A	G	G	G	G	G	G	G	A	G	G	G	G	G	G	#REF!
Y	14215547	7 to GGG_Tzambo	T	C	T	T	T	T	T	T	T	T	T	C	T	T	T	T	#REF!
Y	14215672	2 to 5	A	T	A	A	A	A	A	T	A	A	A	A	A	A	A	T	#REF!
Y	14220559	7 to GGG_Tzambo	C	T	C	C	C	C	C	C	C	C	C	T	C	C	C	C	#REF!
Y	14223755	7 to GGG_Tzambo	G	A	G	G	G	G	G	G	G	G	G	A	G	G	G	G	#REF!
Y	14227212	7 to GGG_Tzambo	T	C	T	T	T	T	T	T	T	T	T	C	T	T	T	T	#REF!
Y	14237848	6 to 7	T	C	T	T	T	C	T	T	C	T	T	C	T	T	T	T	#REF!
Y	14240723	3 to 4	C	T	C	C	C	C	C	C	C	C	C	C	T	T	T	C	#REF!
Y	14243642	10 to GGG_Abe	A	G	A	A	A	A	A	A	A	A	G	A	A	A	A	A	#REF!
Y	14244379	8 to GGG_Azizi	A	G	A	A	A	A	A	A	G	A	A	A	A	A	A	A	#REF!
Y	14245885	1 to 6	A	G	A	G	G	G	A	A	G	G	G	G	A	A	A	A	#REF!
Y	14249952	1 to 2	G	T	G	G	G	G	T	T	G	G	G	G	T	T	T	T	#REF!
Y	14254350	7 to 8	T	C,A	C	C	C	A	C	C	A	C	C	C	C	C	C	C	#REF!
Y	14261774	5 to GBG_Ntabwoba	A	G	A	A	A	A	A	A	A	A	A	A	A	A	A	G	#REF!
Y	14261985	1 to 2	A	T	A	A	A	A	T	T	A	A	A	A	T	T	T	T	#REF!
Y	14264421	7 to 8	C	T	C	C	C	T	C	C	T	C	C	C	C	C	C	C	#REF!
Y	14264642	9 to 11	T	G	T	T	G	T	T	T	T	G	T	T	T	T	T	T	#REF!
Y	14284537	7 to 8	G	A	G	G	G	A	G	G	A	G	G	G	G	G	G	G	#REF!
Y	14285097	9 to 11	C	A	C	C	A	C	C	C	C	A	C	C	C	C	C	C	#REF!
Y	14286524	3 to 4	G	C	G	G	G	G	G	G	G	G	G	G	C	C	C	G	#REF!
Y	14286966	9 to 11	G	A	G	G	A	G	G	G	G	A	G	G	G	G	G	G	#REF!
Y	14296156	9 to 11	T	A	T	T	A	T	T	T	T	A	T	T	T	T	T	T	#REF!
Y	14298983	1 to 6	C	T	T	C	C	C	T	T	C	C	C	C	T	T	T	T	#REF!
Y	14312788	9 to 11	T	C	T	T	C	T	T	T	T	C	T	T	T	T	T	T	#REF!
Y	14313656	7 to GGG_Tzambo	G	A	G	G	G	G	G	G	G	G	G	A	G	G	G	G	#REF!
Y	14314560	7 to GGG_Tzambo	A	G	A	A	A	A	A	A	A	A	A	G	A	A	A	A	#REF!
Y	14315001	9 to 10	A	C	A	C	A	A	A	A	A	A	C	A	A	A	A	A	#REF!
Y	14318003	7 to GGG_Tzambo	C	G	C	C	C	C	C	C	C	C	C	G	C	C	C	C	#REF!
Y	14327583	6 to 9	C	T	C	T	T	C	C	C	C	T	T	C	C	C	C	C	#REF!
Y	14331734	2 to 5	C	T	C	C	C	C	C	T	C	C	C	C	C	C	C	T	#REF!
Y	14332282	1 to 2	A	G	A	A	A	A	G	G	A	A	A	A	G	G	G	G	#REF!
Y	14334401	9 to 10	A	G	A	G	A	A	A	A	A	A	G	A	A	A	A	A	#REF!
Y	14337471	6 to 7	G	A	G	G	G	A	G	G	A	G	G	A	G	G	G	G	#REF!
Y	14338640	1 to 2	A	G	A	A	A	A	G	G	A	A	A	A	G	G	G	G	#REF!
Y	14340078	6 to 9	T	A	T	A	A	T	T	T	T	A	A	T	T	T	T	T	#REF!
Y	14343468	7 to 8	G	A	G	G	G	A	G	G	A	G	G	G	G	G	G	G	#REF!
Y	14345453	7 to 8	G	T	G	G	G	T	G	G	T	G	G	G	G	G	G	G	#REF!
Y	14349772	8 to GGG_Nikumba	C	T	C	C	C	T	C	C	C	C	C	C	C	C	C	C	#REF!
Y	14351939	1 to ancestral; 7 to GGG_Tzambo	G	A	G	A	A	A	A	A	A	A	A	G	A	A	A	A	#REF!
Y	14362040	1 to 2	C	T	C	C	C	C	T	T	C	C	C	C	T	T	T	T	#REF!
Y	14365073	3 to 4	G	A	G	G	G	G	G	G	G	G	G	G	A	A	A	G	#REF!
Y	14365524	2 to 5	G	C	G	G	G	G	G	C	G	G	G	G	G	G	G	C	#REF!
Y	14378678	9 to 11	G	T	G	G	T	G	G	G	G	T	G	G	G	G	G	G	#REF!
Y	14392275	1 to 6	C	T	C	T	T	T	C	C	T	T	T	T	C	C	C	C	#REF!
Y	14392901	1 to 6	G	T	G	T	T	T	G	G	T	T	T	T	G	G	G	G	#REF!
Y	14394686	1 to 2	G	C	G	G	G	G	C	C	G	G	G	G	C	C	C	C	#REF!
Y	14395563	1 to 6	T	C	T	C	C	C	T	T	C	C	C	C	T	T	T	T	#REF!
Y	14399095	1 to 6	G	T	G	T	T	T	G	G	T	T	T	T	G	G	G	G	#REF!
Y	14400244	9 to 11	C	T	C	C	T	C	C	C	C	T	C	C	C	C	C	C	#REF!
Y	14409208	1 to ancestral; 7 to GGG_Tzambo	A	G	A	G	G	G	G	G	G	G	G	A	G	G	G	G	#REF!
Y	14409642	9 to 10	G	A	G	A	G	G	G	G	G	G	A	G	G	G	G	G	#REF!
Y	14417082	1 to 2	C	T	C	C	C	C	T	T	C	C	C	C	T	T	T	T	#REF!
Y	14427828	1 to 6	T	C	T	C	C	C	T	T	C	C	C	C	T	T	T	T	#REF!
Y	14431183	6 to 9	G	A	G	A	A	G	G	G	G	A	A	G	G	G	G	G	#REF!
Y	14449543	1 to 6	A	G	A	G	G	G	A	A	G	G	G	G	A	A	A	A	#REF!
Y	14462234	9 to 10	G	T	G	T	G	G	G	G	G	G	T	G	G	G	G	G	#REF!
Y	14486788	1 to ancestral; 9 to 11	G	A	G	A	G	A	A	A	A	G	A	A	A	A	A	A	#REF!
Y	14486970	7 to GGG_Tzambo	G	T	G	G	G	G	G	G	G	G	G	T	G	G	G	G	#REF!
Y	14495156	2 to 3	A	G	A	A	A	A	G	A	A	A	A	A	G	G	G	A	#REF!
Y	14495178	2 to 3	T	C	T	T	T	T	C	T	T	T	T	T	C	C	C	T	#REF!
Y	14496052	1 to 2	C	A	C	C	C	C	A	A	C	C	C	C	A	A	A	A	#REF!
Y	14512248	7 to 8	G	A	G	G	G	A	G	G	A	G	G	G	G	G	G	G	#REF!
Y	14517887	6 to 7	T	C	T	T	T	C	T	T	C	T	T	C	T	T	T	T	#REF!
Y	14521377	9 to 11	G	A	G	G	A	G	G	G	G	A	G	G	G	G	G	G	#REF!
Y	14521718	1 to 2	C	T	C	C	C	C	T	T	C	C	C	C	T	T	T	T	#REF!
Y	14530018	9 to 10	G	A	G	A	G	G	G	G	G	G	A	G	G	G	G	G	#REF!
Y	14530203	5 to GBG_Kaisi	G	C	G	G	G	G	G	C	G	G	G	G	G	G	G	G	#REF!
Y	14530542	9 to 11	T	A	T	T	A	T	T	T	T	A	T	T	T	T	T	T	#REF!
Y	14538348	8 to GGG_Nikumba	C	T	C	C	C	T	C	C	C	C	C	C	C	C	C	C	#REF!
Y	14539345	7 to GGG_Tzambo	G	T	G	G	G	G	G	G	G	G	G	T	G	G	G	G	#REF!
Y	14541334	1 to 2	A	G	A	A	A	A	G	G	A	A	A	A	G	G	G	G	#REF!
Y	14541345	2 to 5	A	C	A	A	A	A	A	C	A	A	A	A	A	A	A	C	#REF!
Y	14553261	9 to 11	C	T	C	C	T	C	C	C	C	T	C	C	C	C	C	C	#REF!
Y	14556877	7 to GGG_Tzambo	C	A	C	C	C	C	C	C	C	C	C	A	C	C	C	C	#REF!
Y	14566647	6 to 9	C	G	C	G	G	C	C	C	C	G	G	C	C	C	C	C	#REF!
Y	14571658	7 to 8	A	G	G	G	G	A	G	G	A	G	G	G	G	G	G	G	#REF!
Y	14572460	6 to 9	C	T	C	T	T	C	C	C	C	T	T	C	C	C	C	C	#REF!
Y	14572831	1 to 2	C	T	C	C	C	C	T	T	C	C	C	C	T	T	T	T	#REF!
Y	14577603	1 to 6	C	T	C	T	T	T	C	C	T	T	T	T	C	C	C	C	#REF!
Y	14579296	9 to 10	T	C	T	C	T	T	T	T	T	T	C	T	T	T	T	T	#REF!
Y	14580022	3 to GBG_Mkubwa	T	C	C	C	C	C	T	C	C	C	C	C	C	C	C	C	#REF!
Y	14591605	3 to GBG_Mkubwa	C	T	C	C	C	C	T	C	C	C	C	C	C	C	C	C	#REF!
Y	14597797	6 to 9	C	T	C	T	T	C	C	C	C	T	T	C	C	C	C	C	#REF!
Y	14600551	7 to 8	T	C	T	T	T	C	T	T	C	T	T	T	T	T	T	T	#REF!
Y	14600991	1 to 6; 9 to 11	A	G,T	A	G	T	G	A	A	G	T	G	G	A	A	A	A	#REF!
Y	14601676	2 to 3	T	C	T	T	T	T	C	T	T	T	T	T	C	C	C	T	#REF!
Y	14601958	2 to 3	C	T	C	C	C	C	T	C	C	C	C	C	T	T	T	C	#REF!
Y	14626636	1 to 2	G	A	G	G	G	G	A	A	G	G	G	G	A	A	A	A	#REF!
Y	14627016	1 to 6	A	C	A	C	C	C	A	A	C	C	C	C	A	A	A	A	#REF!
Y	14627559	11 to GGG_Banjo	T	A	T	T	T	T	T	T	T	A	T	T	T	T	T	T	#REF!
Y	14636531	3 to GBG_Mkubwa; 5 to GBG_Kaisi	T	C	T	T	T	T	C	C	T	T	T	T	T	T	T	T	#REF!
Y	14651434	9 to 11	G	A	G	G	A	G	G	G	G	A	G	G	G	G	G	G	#REF!
Y	14653448	2 to 5	G	A	G	G	G	G	G	A	G	G	G	G	G	G	G	A	#REF!
Y	14655801	1 to 6	C	G	C	G	G	G	C	C	G	G	G	G	C	C	C	C	#REF!
Y	14710767	6 to 9	C	T	C	T	T	C	C	C	C	T	T	C	C	C	C	C	#REF!
Y	14721130	1 to 2	A	G	A	A	A	A	G	G	A	A	A	A	G	G	G	G	#REF!
Y	14723165	2 to 5	G	A	G	G	G	G	G	A	G	G	G	G	G	G	G	A	#REF!
Y	14727442	7 to GGG_Tzambo	G	A	G	G	G	G	G	G	G	G	G	A	G	G	G	G	#REF!
Y	14727916	9 to 10	C	G	C	G	C	C	C	C	C	C	G	C	C	C	C	C	#REF!
Y	14751491	3 to 4	C	T	C	C	C	C	C	C	C	C	C	C	T	T	T	C	#REF!
Y	14775545	7 to 8	G	A	G	G	G	A	G	G	A	G	G	G	G	G	G	G	#REF!
Y	14775676	1 to 6	T	G	T	G	G	G	T	T	G	G	G	G	T	T	T	T	#REF!
Y	14800813	9 to 11	T	C	T	T	C	T	T	T	T	C	T	T	T	T	T	T	#REF!
Y	14805428	7 to GGG_Tzambo	G	A	G	G	G	G	G	G	G	G	G	A	G	G	G	G	#REF!
Y	14810923	1 to 6	T	G	T	G	G	G	T	T	G	G	G	G	T	T	T	T	#REF!
Y	14818973	1 to 2	G	C	G	G	G	G	C	C	G	G	G	G	C	C	C	C	#REF!
Y	14819723	9 to 11	G	A	G	G	A	G	G	G	G	A	G	G	G	G	G	G	#REF!
Y	14821701	7 to 8	T	C	T	T	T	C	T	T	C	T	T	T	T	T	T	T	#REF!
Y	14821948	7 to GGG_Tzambo	G	A	G	G	G	G	G	G	G	G	G	A	G	G	G	G	#REF!
Y	14831261	9 to 11	A	G	A	A	G	A	A	A	A	G	A	A	A	A	A	A	#REF!
Y	14832750	9 to 10	G	A	G	A	G	G	G	G	G	G	A	G	G	G	G	G	#REF!
Y	14834930	6 to 9	G	C	G	C	C	G	G	G	G	C	C	G	G	G	G	G	#REF!
Y	14835573	1 to 6	G	A	G	A	A	A	G	G	A	A	A	A	G	G	G	G	#REF!
Y	14837293	9 to 11	C	T	C	C	T	C	C	C	C	T	C	C	C	C	C	C	#REF!
Y	14839749	6 to 7	T	A	T	T	T	A	T	T	A	T	T	A	T	T	T	T	#REF!
Y	14850441	1 to 2	A	G	A	A	A	A	G	G	A	A	A	A	G	G	G	G	#REF!
Y	14880905	9 to 10	T	G	T	G	T	T	T	T	T	T	G	T	T	T	T	T	#REF!
Y	14886046	7 to GGG_Tzambo	G	A	G	G	G	G	G	G	G	G	G	A	G	G	G	G	#REF!
Y	14888309	7 to 8	A	G	A	A	A	G	A	A	G	A	A	A	A	A	A	A	#REF!
Y	14892389	1 to 2	G	A	G	G	G	G	A	A	G	G	G	G	A	A	A	A	#REF!
Y	14896490	1 to 6	C	T	T	C	C	C	T	T	C	C	C	C	T	T	T	T	#REF!
Y	14899144	1 to 6	A	G	A	G	G	G	A	A	G	G	G	G	A	A	A	A	#REF!
Y	14905279	8 to GGG_Nikumba	A	G	A	A	A	G	A	A	A	A	A	A	A	A	A	A	#REF!
Y	14913805	1 to 6	G	A	G	A	A	A	G	G	A	A	A	A	G	G	G	G	#REF!
Y	14915066	7 to 8	G	A	G	G	G	A	G	G	A	G	G	G	G	G	G	G	#REF!
Y	14921874	2 to 5	T	C	T	T	T	T	T	C	T	T	T	T	T	T	T	C	#REF!
Y	14923235	9 to 10	A	G	A	G	A	A	A	A	A	A	G	A	A	A	A	A	#REF!
Y	14925774	1 to 2	G	A	G	G	G	G	A	A	G	G	G	G	A	A	A	A	#REF!
Y	14927190	9 to 11	T	G	T	T	G	T	T	T	T	G	T	T	T	T	T	T	#REF!
Y	14945640	11 to GGG_Guy	G	A	G	G	A	G	G	G	G	G	G	G	G	G	G	G	#REF!
Y	14950996	1 to 2	T	C	T	T	T	T	C	C	T	T	T	T	C	C	C	C	#REF!
Y	14951098	7 to GGG_Tzambo	T	C	T	T	T	T	T	T	T	T	T	C	T	T	T	T	#REF!
Y	14965964	9 to 11	G	C	G	G	C	G	G	G	G	C	G	G	G	G	G	G	#REF!
Y	14967475	9 to 10	C	T	C	T	C	C	C	C	C	C	T	C	C	C	C	C	#REF!
Y	14968198	7 to GGG_Tzambo	A	G	A	A	A	A	A	A	A	A	A	G	A	A	A	A	#REF!
Y	14972885	11 to GGG_Guy	G	T	G	G	T	G	G	G	G	G	G	G	G	G	G	G	#REF!
Y	14973211	7 to GGG_Tzambo	G	C	G	G	G	G	G	G	G	G	G	C	G	G	G	G	#REF!
Y	14982824	3 to GBG_Mkubwa	G	T	G	G	G	G	T	G	G	G	G	G	G	G	G	G	#REF!
Y	14984464	1 to 6	G	A	G	A	A	A	G	G	A	A	A	A	G	G	G	G	#REF!
Y	14999078	8 to GGG_Azizi	G	A	G	G	G	G	G	G	A	G	G	G	G	G	G	G	#REF!
Y	15000772	1 to 6	A	G	A	G	G	G	A	A	G	G	G	G	A	A	A	A	#REF!
Y	15014982	2 to 3	C	T	C	C	C	C	T	C	C	C	C	C	T	T	T	C	#REF!
Y	15018118	9 to 11	A	G	A	A	G	A	A	A	A	G	A	A	A	A	A	A	#REF!
Y	15020381	11 to GGG_Guy	G	A	G	G	A	G	G	G	G	G	G	G	G	G	G	G	#REF!
Y	15021780	1 to 6	A	G	G	A	A	A	G	G	A	A	A	A	G	G	G	G	#REF!
Y	15021889	7 to 8	A	G	A	A	A	G	A	A	G	A	A	A	A	A	A	A	#REF!
Y	15023852	2 to 5	A	T	A	A	A	A	A	T	A	A	A	A	A	A	A	T	#REF!
Y	15028011	8 to GGG_Nikumba	G	A	G	G	G	A	G	G	G	G	G	G	G	G	G	G	#REF!
Y	15028986	7 to 8	C	A	C	C	C	A	C	C	A	C	C	C	C	C	C	C	#REF!
Y	15031499	9 to 10	T	C	T	C	T	T	T	T	T	T	C	T	T	T	T	T	#REF!
Y	15039652	6 to 9	A	G	A	G	G	A	A	A	A	G	G	A	A	A	A	A	#REF!
Y	15040209	1 to 2	T	C	T	T	T	T	C	C	T	T	T	T	C	C	C	C	#REF!
Y	15046864	1 to 2	C	A	C	C	C	C	A	A	C	C	C	C	A	A	A	A	#REF!
Y	15053246	8 to GGG_Nikumba	C	T	C	C	C	T	C	C	C	C	C	C	C	C	C	C	#REF!
Y	15059363	9 to 11	C	T	C	C	T	C	C	C	C	T	C	C	C	C	C	C	#REF!
Y	15059685	9 to 11	C	A	C	C	A	C	C	C	C	A	C	C	C	C	C	C	#REF!
Y	15087179	1 to 2	T	C	T	T	T	T	C	C	T	T	T	T	C	C	C	C	#REF!
Y	15088221	1 to 6	T	C	T	C	C	C	T	T	C	C	C	C	T	T	T	T	#REF!
Y	15088998	9 to 11	G	A	G	G	A	G	G	G	G	A	G	G	G	G	G	G	#REF!
Y	15140516	7 to 8	G	C	G	G	G	C	G	G	C	G	G	G	G	G	G	G	#REF!
Y	15154475	1 to ancestral; 7 to GGG_Tzambo	T	C	T	C	C	C	C	C	C	C	C	T	C	C	C	C	#REF!
Y	15195995	11 to GGG_Banjo	T	C	T	T	T	T	T	T	T	C	T	T	T	T	T	T	#REF!
Y	15239929	7 to 8	C	G	C	C	C	G	C	C	G	C	C	C	C	C	C	C	#REF!
Y	15239997	1 to 2	G	A	G	G	G	G	A	A	G	G	G	G	A	A	A	A	#REF!
Y	15241003	7 to GGG_Tzambo	G	A	G	G	G	G	G	G	G	G	G	A	G	G	G	G	#REF!
Y	15241128	1 to ancestral; 7 to 8	A	C	A	C	C	A	C	C	A	C	C	C	C	C	C	C	#REF!
Y	15258140	1 to 6	C	T	C	T	T	T	C	C	T	T	T	T	C	C	C	C	#REF!
Y	15258200	1 to 6	A	G	A	G	G	G	A	A	G	G	G	G	A	A	A	A	#REF!
Y	15258232	1 to 2	A	T	A	A	A	A	T	T	A	A	A	A	T	T	T	T	#REF!
Y	15266342	11 to GGG_Guy	A	T	A	A	T	A	A	A	A	A	A	A	A	A	A	A	#REF!
Y	15266623	7 to 8	C	T	C	C	C	T	C	C	T	C	C	C	C	C	C	C	#REF!
Y	15266717	9 to 10	G	T	G	T	G	G	G	G	G	G	T	G	G	G	G	G	#REF!
Y	15269738	1 to 2	G	C	G	G	G	G	C	C	G	G	G	G	C	C	C	C	#REF!
Y	15270586	1 to 2	T	C	T	T	T	T	C	C	T	T	T	T	C	C	C	C	#REF!
Y	15272814	8 to GGG_Azizi	T	C	T	T	T	T	T	T	C	T	T	T	T	T	T	T	#REF!
Y	15273458	9 to 11	T	G	T	T	G	T	T	T	T	G	T	T	T	T	T	T	#REF!
Y	15273986	9 to 11	C	T	C	C	T	C	C	C	C	T	C	C	C	C	C	C	#REF!
Y	15274981	1 to ancestral; 9 to 10	T	C	T	T	C	C	C	C	C	C	T	C	C	C	C	C	#REF!
Y	15278297	1 to 2	T	A	T	T	T	T	A	A	T	T	T	T	A	A	A	A	#REF!
Y	15316781	7 to GGG_Tzambo	C	A	C	C	C	C	C	C	C	C	C	A	C	C	C	C	#REF!
Y	15318739	7 to GGG_Tzambo	C	T	C	C	C	C	C	C	C	C	C	T	C	C	C	C	#REF!
Y	15359483	2 to 5	G	A	G	G	G	G	G	A	G	G	G	G	G	G	G	A	#REF!
Y	15363283	2 to 3	T	C	T	T	T	T	C	T	T	T	T	T	C	C	C	T	#REF!
Y	15374207	6 to 7	G	A	G	G	G	A	G	G	A	G	G	A	G	G	G	G	#REF!
Y	15387465	9 to 10	C	G	C	G	C	C	C	C	C	C	G	C	C	C	C	C	#REF!
Y	15412424	1 to 2	C	T	C	C	C	C	T	T	C	C	C	C	T	T	T	T	#REF!
Y	15436075	11 to GGG_Banjo	T	G	T	T	T	T	T	T	T	G	T	T	T	T	T	T	#REF!
Y	15441390	1 to 6	T	C	T	C	C	C	T	T	C	C	C	C	T	T	T	T	#REF!
Y	15462805	1 to 2	A	T	A	A	A	A	T	T	A	A	A	A	T	T	T	T	#REF!
Y	15473089	2 to 3	T	C	T	T	T	T	C	T	T	T	T	T	C	C	C	T	#REF!
Y	15475424	2 to 3	T	A	T	T	T	T	A	T	T	T	T	T	A	A	A	T	#REF!
Y	15475462	11 to GGG_Guy	A	C	A	A	C	A	A	A	A	A	A	A	A	A	A	A	#REF!
Y	15475632	1 to 2	A	C	A	A	A	A	C	C	A	A	A	A	C	C	C	C	#REF!
Y	15482267	6 to 9	A	G	A	G	G	A	A	A	A	G	G	A	A	A	A	A	#REF!
Y	15499166	2 to 5	A	G	A	A	A	A	A	G	A	A	A	A	A	A	A	G	#REF!
Y	15500285	1 to 6	C	T	T	C	C	C	T	T	C	C	C	C	T	T	T	T	#REF!
Y	15520048	6 to 9	G	A	G	A	A	G	G	G	G	A	A	G	G	G	G	G	#REF!
Y	15521345	6 to 9	T	C	T	C	C	T	T	T	T	C	C	T	T	T	T	T	#REF!
Y	15526918	7 to GGG_Tzambo	A	C	A	A	A	A	A	A	A	A	A	C	A	A	A	A	#REF!
Y	15534206	1 to 2	A	C	A	A	A	A	C	C	A	A	A	A	C	C	C	C	#REF!
Y	15535288	2 to 5	A	G	A	A	A	A	A	G	A	A	A	A	A	A	A	G	#REF!
Y	15535486	9 to 11	C	A	C	C	A	C	C	C	C	A	C	C	C	C	C	C	#REF!
Y	15535742	9 to 10	T	C	T	C	T	T	T	T	T	T	C	T	T	T	T	T	#REF!
Y	15561957	2 to 3	A	G	A	A	A	A	G	A	A	A	A	A	G	G	G	A	#REF!
Y	15573303	2 to 5	G	T	G	G	G	G	G	T	G	G	G	G	G	G	G	T	#REF!
Y	15577492	2 to 5	G	C	G	G	G	G	G	C	G	G	G	G	G	G	G	C	#REF!
Y	15577619	2 to 5	C	G	G	G	G	G	G	C	G	G	G	G	G	G	G	C	#REF!
Y	15577620	2 to 5	C	T	C	C	C	C	C	T	C	C	C	C	C	C	C	T	#REF!
Y	15578518	1 to 2	C	T	C	C	C	C	T	T	C	C	C	C	T	T	T	T	#REF!
Y	15580661	7 to GGG_Tzambo	C	T	C	C	C	C	C	C	C	C	C	T	C	C	C	C	#REF!
Y	15585287	7 to GGG_Tzambo	A	T	A	A	A	A	A	A	A	A	A	T	A	A	A	A	#REF!
Y	15587425	1 to 2	A	G	A	A	A	A	G	G	A	A	A	A	G	G	G	G	#REF!
Y	15587947	2 to 3	T	A	T	T	T	T	A	T	T	T	T	T	A	A	A	T	#REF!
Y	15590878	7 to 8	A	G	A	A	A	G	A	A	G	A	A	A	A	A	A	A	#REF!
Y	15592954	7 to 8	C	G	C	C	C	G	C	C	G	C	C	C	C	C	C	C	#REF!
Y	15594977	1 to 2	A	G	A	A	A	A	G	G	A	A	A	A	G	G	G	G	#REF!
Y	15603308	1 to 2	G	A	G	G	G	G	A	A	G	G	G	G	A	A	A	A	#REF!
Y	15604034	1 to 6	G	A	G	A	A	A	G	G	A	A	A	A	G	G	G	G	#REF!
Y	15608928	7 to GGG_Tzambo	A	C,T	C	C	C	C	C	C	C	C	C	T	C	C	C	C	#REF!
Y	15634047	7 to GGG_Tzambo	C	T	C	C	C	C	C	C	C	C	C	T	C	C	C	C	#REF!
Y	15634669	2 to 5	T	G	T	T	T	T	T	G	T	T	T	T	T	T	T	G	#REF!
Y	15634973	11 to GGG_Guy	T	C	T	T	C	T	T	T	T	T	T	T	T	T	T	T	#REF!
Y	15680481	7 to 8	A	T	A	A	A	T	A	A	T	A	A	A	A	A	A	A	#REF!
Y	15734526	2 to 5	A	G	A	A	A	A	A	G	A	A	A	A	A	A	A	G	#REF!
Y	15734834	2 to 5	C	A	C	C	C	C	C	A	C	C	C	C	C	C	C	A	#REF!
Y	15749980	1 to 2	T	C	T	T	T	T	C	C	T	T	T	T	C	C	C	C	#REF!
Y	15750595	2 to 3	G	A	G	G	G	G	A	G	G	G	G	G	A	A	A	G	#REF!
Y	15751086	3 to 4	C	T	C	C	C	C	C	C	C	C	C	C	T	T	T	C	#REF!
Y	15752533	9 to 10	C	G	C	G	C	C	C	C	C	C	G	C	C	C	C	C	#REF!
Y	15752681	10 to GGG_Fritz	C	A	C	A	C	C	C	C	C	C	C	C	C	C	C	C	#REF!
Y	15802107	1 to 6	A	G	A	G	G	G	A	A	G	G	G	G	A	A	A	A	#REF!
Y	15802292	9 to 11	A	T	A	A	T	A	A	A	A	T	A	A	A	A	A	A	#REF!
Y	15802433	2 to 3	G	T	G	G	G	G	T	G	G	G	G	G	T	T	T	G	#REF!
Y	15810440	3 to GBG_Mkubwa	G	A	G	G	G	G	A	G	G	G	G	G	G	G	G	G	#REF!
Y	15813339	7 to 8	C	G	C	C	C	G	C	C	G	C	C	C	C	C	C	C	#REF!
Y	15814572	6 to 7	G	A	G	G	G	A	G	G	A	G	G	A	G	G	G	G	#REF!
Y	15815977	2 to 5	T	G	T	T	T	T	T	G	T	T	T	T	T	T	T	G	#REF!
Y	15816811	11 to GGG_Banjo	T	G	T	T	T	T	T	T	T	G	T	T	T	T	T	T	#REF!
Y	15817753	9 to 11	C	A	C	C	A	C	C	C	C	A	C	C	C	C	C	C	#REF!
Y	15820920	1 to 2	C	T	C	C	C	C	T	T	C	C	C	C	T	T	T	T	#REF!
Y	15829391	2 to 3	T	C	T	T	T	T	C	T	T	T	T	T	C	C	C	T	#REF!
Y	15833762	2 to 3	T	A	T	T	T	T	A	T	T	T	T	T	A	A	A	T	#REF!
Y	15842377	1 to 2	T	C	T	T	T	T	C	C	T	T	T	T	C	C	C	C	#REF!
Y	15847817	9 to 10	A	G	A	G	A	A	A	A	A	A	G	A	A	A	A	A	#REF!
Y	15852374	1 to 6	G	A	G	A	A	A	G	G	A	A	A	A	G	G	G	G	#REF!
Y	15896033	9 to 10	C	T	C	T	C	C	C	C	C	C	T	C	C	C	C	C	#REF!
Y	15896836	9 to 11	T	A	T	T	A	T	T	T	T	A	T	T	T	T	T	T	#REF!
Y	15897216	5 to GBG_Ntabwoba	C	T	C	C	C	C	C	C	C	C	C	C	C	C	C	T	#REF!
Y	15897745	6 to 9	G	A	G	A	A	G	G	G	G	A	A	G	G	G	G	G	#REF!
Y	15900517	2 to 5	T	C	T	T	T	T	T	C	T	T	T	T	T	T	T	C	#REF!
Y	15903117	9 to 11	C	G	C	C	G	C	C	C	C	G	C	C	C	C	C	C	#REF!
Y	15905192	7 to 8	T	C	T	T	T	C	T	T	C	T	T	T	T	T	T	T	#REF!
Y	15910856	1 to 6	T	C	T	C	C	C	T	T	C	C	C	C	T	T	T	T	#REF!
Y	15912783	1 to 2	G	C	G	G	G	G	C	C	G	G	G	G	C	C	C	C	#REF!
Y	15926636	7 to 8	A	G	A	A	A	G	A	A	G	A	A	A	A	A	A	A	#REF!
Y	15926747	7 to 8	T	G	T	T	T	G	T	T	G	T	T	T	T	T	T	T	#REF!
Y	15927188	6 to 7	C	T	C	C	C	T	C	C	T	C	C	T	C	C	C	C	#REF!
Y	15927536	7 to 8	T	C	T	T	T	C	T	T	C	T	T	T	T	T	T	T	#REF!
Y	15935468	7 to GGG_Tzambo	G	A	G	G	G	G	G	G	G	G	G	A	G	G	G	G	#REF!
Y	15938811	5 to GBG_Kaisi	T	G	T	T	T	T	T	G	T	T	T	T	T	T	T	T	#REF!
Y	15938990	1 to 2	G	C	G	G	G	G	C	C	G	G	G	G	C	C	C	C	#REF!
Y	15942018	2 to 3	G	T	G	G	G	G	T	G	G	G	G	G	T	T	T	G	#REF!
Y	15942448	7 to GGG_Tzambo	A	G	A	A	A	A	A	A	A	A	A	G	A	A	A	A	#REF!
Y	15944403	3 to GBG_Mkubwa	C	T	C	C	C	C	T	C	C	C	C	C	C	C	C	C	#REF!
Y	15948543	6 to 7	C	T	C	C	C	T	C	C	T	C	C	T	C	C	C	C	#REF!
Y	15956330	6 to 9	G	A	G	A	A	G	G	G	G	A	A	G	G	G	G	G	#REF!
Y	15957412	2 to 3	A	C	A	A	A	A	C	A	A	A	A	A	C	C	C	A	#REF!
Y	15969438	1 to 2	C	G	C	C	C	C	G	G	C	C	C	C	G	G	G	G	#REF!
Y	15970376	9 to 10	A	G	A	G	A	A	A	A	A	A	G	A	A	A	A	A	#REF!
Y	15978039	8 to GGG_Azizi	G	A	G	G	G	G	G	G	A	G	G	G	G	G	G	G	#REF!
Y	15978989	1 to 6	G	A	G	A	A	A	G	G	A	A	A	A	G	G	G	G	#REF!
Y	15979031	5 to GBG_Ntabwoba	A	G	A	A	A	A	A	A	A	A	A	A	A	A	A	G	#REF!
Y	15980855	1 to 6	C	T	C	T	T	T	C	C	T	T	T	T	C	C	C	C	#REF!
Y	15982882	1 to 2	A	G	G	G	G	G	A	A	G	G	G	G	A	A	A	A	#REF!
Y	15982989	9 to 11	A	T	A	A	T	A	A	A	A	T	A	A	A	A	A	A	#REF!
Y	15984084	9 to 11	T	C	T	T	C	T	T	T	T	C	T	T	T	T	T	T	#REF!
Y	15984085	9 to 11	T	C	C	C	T	C	C	C	C	T	C	C	C	C	C	C	#REF!
Y	15989789	6 to 7	C	A	C	C	C	A	C	C	A	C	C	A	C	C	C	C	#REF!
Y	15993036	1 to 6	A	T	A	T	T	T	A	A	T	T	T	T	A	A	A	A	#REF!
Y	15997124	2 to 3	G	A	G	G	G	G	A	G	G	G	G	G	A	A	A	G	#REF!
Y	15998558	3 to 4	C	A	C	C	C	C	C	C	C	C	C	C	A	A	A	C	#REF!
Y	15999049	1 to ancestral; 9 to 10	T	C	T	T	C	C	C	C	C	C	T	C	C	C	C	C	#REF!
Y	16018651	1 to 2	T	C	T	T	T	T	C	C	T	T	T	T	C	C	C	C	#REF!
Y	16027550	1 to 6	G	T	G	T	T	T	G	G	T	T	T	T	G	G	G	G	#REF!
Y	16040885	3 to GBG_Mkubwa	C	G	C	C	C	C	G	C	C	C	C	C	C	C	C	C	#REF!
Y	16040907	8 to GGG_Nikumba	C	T	C	C	C	T	C	C	C	C	C	C	C	C	C	C	#REF!
Y	16044828	1 to 6	G	T	G	T	T	T	G	G	T	T	T	T	G	G	G	G	#REF!
Y	16054242	9 to 10	C	G	C	G	C	C	C	C	C	C	G	C	C	C	C	C	#REF!
Y	16054325	1 to 2	T	C	T	T	T	T	C	C	T	T	T	T	C	C	C	C	#REF!
Y	16060251	7 to GGG_Tzambo	T	G	T	T	T	T	T	T	T	T	T	G	T	T	T	T	#REF!
Y	16071456	3 to GBG_Mkubwa	A	G	A	A	A	A	G	A	A	A	A	A	A	A	A	A	#REF!
Y	16073212	2 to 5	A	G	A	A	A	A	A	G	A	A	A	A	A	A	A	G	#REF!
Y	16173696	2 to 5	C	G	C	C	C	C	C	G	C	C	C	C	C	C	C	G	#REF!
Y	16174565	7 to GGG_Tzambo	C	T	C	C	C	C	C	C	C	C	C	T	C	C	C	C	#REF!
Y	16178901	11 to GGG_Banjo	C	T	C	C	C	C	C	C	C	T	C	C	C	C	C	C	#REF!
Y	16185062	2 to 3	A	G	A	A	A	A	G	A	A	A	A	A	G	G	G	A	#REF!
Y	16185716	9 to 11	T	C	T	T	C	T	T	T	T	C	T	T	T	T	T	T	#REF!
Y	16197134	1 to 6	G	T	G	T	T	T	G	G	T	T	T	T	G	G	G	G	#REF!
Y	16201635	9 to 10	G	A	G	A	G	G	G	G	G	G	A	G	G	G	G	G	#REF!
Y	16205780	1 to 2	C	T	C	C	C	C	T	T	C	C	C	C	T	T	T	T	#REF!
Y	16212967	1 to 2	C	T	C	C	C	C	T	T	C	C	C	C	T	T	T	T	#REF!
Y	16220936	1 to 6	T	A	T	A	A	A	T	T	A	A	A	A	T	T	T	T	#REF!
Y	16222174	9 to 10	C	G	C	G	C	C	C	C	C	C	G	C	C	C	C	C	#REF!
Y	16228453	7 to 8	G	C	G	G	G	C	G	G	C	G	G	G	G	G	G	G	#REF!
Y	16229015	1 to 2	A	C	A	A	A	A	C	C	A	A	A	A	C	C	C	C	#REF!
Y	16231169	1 to 6	T	G	T	G	G	G	T	T	G	G	G	G	T	T	T	T	#REF!
Y	16234854	1 to 2	T	C	C	C	C	C	T	T	C	C	C	C	T	T	T	T	#REF!
Y	16238202	2 to 5	G	A	G	G	G	G	G	A	G	G	G	G	G	G	G	A	#REF!
Y	16243506	1 to 6	A	G	A	G	G	G	A	A	G	G	G	G	A	A	A	A	#REF!
Y	16246668	8 to GGG_Nikumba	G	T	G	G	G	T	G	G	G	G	G	G	G	G	G	G	#REF!
Y	16246680	1 to 2	C	T	C	C	C	C	T	T	C	C	C	C	T	T	T	T	#REF!
Y	16246737	7 to GGG_Tzambo	C	T	C	C	C	C	C	C	C	C	C	T	C	C	C	C	#REF!
Y	16246754	9 to 10	C	T	C	T	C	C	C	C	C	C	T	C	C	C	C	C	#REF!
Y	16248657	11 to GGG_Guy	A	G	A	A	G	A	A	A	A	A	A	A	A	A	A	A	#REF!
Y	16249975	1 to 2	A	C	A	A	A	A	C	C	A	A	A	A	C	C	C	C	#REF!
Y	16256112	1 to 6	A	G	A	G	G	G	A	A	G	G	G	G	A	A	A	A	#REF!
Y	16256224	1 to 6	C	G	C	G	G	G	C	C	G	G	G	G	C	C	C	C	#REF!
Y	16264157	9 to 11	A	G	A	A	G	A	A	A	A	G	A	A	A	A	A	A	#REF!
Y	16280583	7 to 8	T	C	T	T	T	C	T	T	C	T	T	T	T	T	T	T	#REF!
Y	16284285	7 to GGG_Tzambo	C	T	C	C	C	C	C	C	C	C	C	T	C	C	C	C	#REF!
Y	16287140	11 to GGG_Guy	G	A	G	G	A	G	G	G	G	G	G	G	G	G	G	G	#REF!
Y	16291877	7 to 8	A	G	A	A	A	G	A	A	G	A	A	A	A	A	A	A	#REF!
Y	16292136	2 to 5	C	T	C	C	C	C	C	T	C	C	C	C	C	C	C	T	#REF!
Y	16309828	1 to 2	G	T	G	G	G	G	T	T	G	G	G	G	T	T	T	T	#REF!
Y	16310928	2 to 3	G	T	G	G	G	G	T	G	G	G	G	G	T	T	T	G	#REF!
Y	16324782	9 to 10	G	A	G	A	G	G	G	G	G	G	A	G	G	G	G	G	#REF!
Y	16325763	7 to 8	T	C	T	T	T	C	T	T	C	T	T	T	T	T	T	T	#REF!
Y	16330201	3 to 4	C	T	C	C	C	C	C	C	C	C	C	C	T	T	T	C	#REF!
Y	16331105	1 to 6	C	T	C	T	T	T	C	C	T	T	T	T	C	C	C	C	#REF!
Y	16332349	2 to 5	C	G	C	C	C	C	C	G	C	C	C	C	C	C	C	G	#REF!
Y	16334273	1 to 6	A	G	A	G	G	G	A	A	G	G	G	G	A	A	A	A	#REF!
Y	16337891	1 to 2	G	C	G	G	G	G	C	C	G	G	G	G	C	C	C	C	#REF!
Y	16338034	7 to GGG_Tzambo	C	T	C	C	C	C	C	C	C	C	C	T	C	C	C	C	#REF!
Y	16339952	5 to GBG_Ntabwoba	A	G	A	A	A	A	A	A	A	A	A	A	A	A	A	G	#REF!
Y	16342830	9 to 10	C	G	C	G	C	C	C	C	C	C	G	C	C	C	C	C	#REF!
Y	16343060	9 to 10	G	A	G	A	G	G	G	G	G	G	A	G	G	G	G	G	#REF!
Y	16343966	1 to 2	C	T	C	C	C	C	T	T	C	C	C	C	T	T	T	T	#REF!
Y	16345338	9 to 10	A	G	A	G	A	A	A	A	A	A	G	A	A	A	A	A	#REF!
Y	16346416	7 to GGG_Tzambo	G	C,T	C	C	C	C	C	C	C	C	C	T	C	C	C	C	#REF!
Y	16348847	9 to 11	G	T	G	G	T	G	G	G	G	T	G	G	G	G	G	G	#REF!
Y	16348964	7 to GGG_Tzambo	T	C	T	T	T	T	T	T	T	T	T	C	T	T	T	T	#REF!
Y	16362570	1 to 6	C	A	C	A	A	A	C	C	A	A	A	A	C	C	C	C	#REF!
Y	16364249	7 to 8	T	C	T	T	T	C	T	T	C	T	T	T	T	T	T	T	#REF!
Y	16369628	1 to 2	C	T	C	C	C	C	T	T	C	C	C	C	T	T	T	T	#REF!
Y	16372282	1 to 6	T	A,C	C	A	A	A	C	C	A	A	A	A	C	C	C	C	#REF!
Y	16374806	1 to 2	A	G	A	A	A	A	G	G	A	A	A	A	G	G	G	G	#REF!
Y	16374968	1 to 6	T	C	T	C	C	C	T	T	C	C	C	C	T	T	T	T	#REF!
Y	16377756	9 to 11	G	A	G	G	A	G	G	G	G	A	G	G	G	G	G	G	#REF!
Y	16378197	7 to 8	T	G	T	T	T	G	T	T	G	T	T	T	T	T	T	T	#REF!
Y	16385425	7 to GGG_Tzambo	G	A	G	G	G	G	G	G	G	G	G	A	G	G	G	G	#REF!
Y	16388041	1 to 6	G	T	G	T	T	T	G	G	T	T	T	T	G	G	G	G	#REF!
Y	16388832	4 to GBB_Imfura	T	C	T	T	T	T	T	T	T	T	T	T	C	T	T	T	#REF!
Y	16389471	2 to 3	C	T	C	C	C	C	T	C	C	C	C	C	T	T	T	C	#REF!
Y	16392456	2 to 3	G	T	G	G	G	G	T	G	G	G	G	G	T	T	T	G	#REF!
Y	16392587	2 to 3	T	C	C	C	C	C	T	C	C	C	C	C	T	T	T	C	#REF!
Y	16408186	6 to 7	C	T	C	C	C	T	C	C	T	C	C	T	C	C	C	C	#REF!
Y	16416436	7 to 8	T	A	T	T	T	A	T	T	A	T	T	T	T	T	T	T	#REF!
Y	16418433	1 to 6	G	A	G	A	A	A	G	G	A	A	A	A	G	G	G	G	#REF!
Y	16419005	6 to 7	T	C	T	T	T	C	T	T	C	T	T	C	T	T	T	T	#REF!
Y	16420138	2 to 3	G	C	G	G	G	G	C	G	G	G	G	G	C	C	C	G	#REF!
Y	16433221	6 to 7	C	T	C	C	C	T	C	C	T	C	C	T	C	C	C	C	#REF!
Y	16434833	1 to 2	C	G	C	C	C	C	G	G	C	C	C	C	G	G	G	G	#REF!
Y	16434978	7 to 8	G	A	G	G	G	A	G	G	A	G	G	G	G	G	G	G	#REF!
Y	16437344	9 to 10	G	A	G	A	G	G	G	G	G	G	A	G	G	G	G	G	#REF!
Y	16443819	9 to 11	C	A	C	C	A	C	C	C	C	A	C	C	C	C	C	C	#REF!
Y	16444763	1 to 2	A	G	G	G	G	G	A	A	G	G	G	G	A	A	A	A	#REF!
Y	16451018	9 to 10	A	C	A	C	A	A	A	A	A	A	C	A	A	A	A	A	#REF!
Y	16455766	8 to GGG_Nikumba	G	A	G	G	G	A	G	G	G	G	G	G	G	G	G	G	#REF!
Y	16456172	7 to 8	G	T	G	G	G	T	G	G	T	G	G	G	G	G	G	G	#REF!
Y	16459200	9 to 11	T	G	T	T	G	T	T	T	T	G	T	T	T	T	T	T	#REF!
Y	16459484	11 to GGG_Guy	C	T	C	C	T	C	C	C	C	C	C	C	C	C	C	C	#REF!
Y	16472582	6 to 9	C	T	C	T	T	C	C	C	C	T	T	C	C	C	C	C	#REF!
Y	16477651	7 to 8	T	C	T	T	T	C	T	T	C	T	T	T	T	T	T	T	#REF!
Y	16478071	1 to 2	G	A	G	G	G	G	A	A	G	G	G	G	A	A	A	A	#REF!
Y	16478403	1 to 2	T	A	T	T	T	T	A	A	T	T	T	T	A	A	A	A	#REF!
Y	16484826	7 to GGG_Tzambo	T	C	T	T	T	T	T	T	T	T	T	C	T	T	T	T	#REF!
Y	16484839	9 to 10	T	C	T	C	T	T	T	T	T	T	C	T	T	T	T	T	#REF!
Y	16493623	7 to 8	C	T	C	C	C	T	C	C	T	C	C	C	C	C	C	C	#REF!
Y	16493934	10 to GGG_Fritz	G	A	G	A	G	G	G	G	G	G	G	G	G	G	G	G	#REF!
Y	16494031	9 to 11	A	G	A	A	G	A	A	A	A	G	A	A	A	A	A	A	#REF!
Y	16495541	9 to 10	G	C	G	C	G	G	G	G	G	G	C	G	G	G	G	G	#REF!
Y	16497518	1 to 2	T	C	C	C	C	C	T	T	C	C	C	C	T	T	T	T	#REF!
Y	16497934	6 to 7	G	A	G	G	G	A	G	G	A	G	G	A	G	G	G	G	#REF!
Y	16497956	3 to 4	T	C	T	T	T	T	T	T	T	T	T	T	C	C	C	T	#REF!
Y	16505880	1 to ancestral; 1 to 6; 2 to 3; 2 to 5	C	T	C	T	T	T	T	C	T	T	T	T	T	T	T	C	#REF!
Y	16512477	1 to 6	C	T	T	C	C	C	T	T	C	C	C	C	T	T	T	T	#REF!
Y	16515277	9 to 11	C	A	C	C	A	C	C	C	C	A	C	C	C	C	C	C	#REF!
Y	16517585	2 to 3	T	C	T	T	T	T	C	T	T	T	T	T	C	C	C	T	#REF!
Y	16518294	9 to 10	G	A	G	A	G	G	G	G	G	G	A	G	G	G	G	G	#REF!
Y	16518864	7 to GGG_Tzambo	G	A	G	G	G	G	G	G	G	G	G	A	G	G	G	G	#REF!
Y	16523341	9 to 11	T	G	G	G	T	G	G	G	G	T	G	G	G	G	G	G	#REF!
Y	16524176	2 to 3	A	G	A	A	A	A	G	A	A	A	A	A	G	G	G	A	#REF!
Y	16528565	9 to 11	G	A	G	G	A	G	G	G	G	A	G	G	G	G	G	G	#REF!
Y	16529862	1 to 2	G	A	G	G	G	G	A	A	G	G	G	G	A	A	A	A	#REF!
Y	16535590	9 to 10	A	C	A	C	A	A	A	A	A	A	C	A	A	A	A	A	#REF!
Y	16535612	7 to GGG_Tzambo	A	G	A	A	A	A	A	A	A	A	A	G	A	A	A	A	#REF!
Y	16537679	7 to 8	C	T	C	C	C	T	C	C	T	C	C	C	C	C	C	C	#REF!
Y	16538780	8 to GGG_Nikumba	G	A	G	G	G	A	G	G	G	G	G	G	G	G	G	G	#REF!
Y	16545581	1 to 2	G	A	G	G	G	G	A	A	G	G	G	G	A	A	A	A	#REF!
Y	16546332	8 to GGG_Nikumba	C	G	C	C	C	G	C	C	C	C	C	C	C	C	C	C	#REF!
Y	16553274	5 to GBG_Kaisi	C	T	C	C	C	C	C	T	C	C	C	C	C	C	C	C	#REF!
Y	16556519	9 to 11	C	T	C	C	T	C	C	C	C	T	C	C	C	C	C	C	#REF!
Y	16557218	1 to 6	C	G	C	G	G	G	C	C	G	G	G	G	C	C	C	C	#REF!
Y	16559083	1 to 6	T	C	C	T	T	T	C	C	T	T	T	T	C	C	C	C	#REF!
Y	16559404	7 to 8	C	T	C	C	C	T	C	C	T	C	C	C	C	C	C	C	#REF!
Y	16561650	7 to 8	A	G	A	A	A	G	A	A	G	A	A	A	A	A	A	A	#REF!
Y	16563742	11 to GGG_Guy	A	G	A	A	G	A	A	A	A	A	A	A	A	A	A	A	#REF!
Y	16566877	1 to 6	A	G	A	G	G	G	A	A	G	G	G	G	A	A	A	A	#REF!
Y	16572006	1 to 2	C	G	C	C	C	C	G	G	C	C	C	C	G	G	G	G	#REF!
Y	16572191	7 to GGG_Tzambo	C	T	C	C	C	C	C	C	C	C	C	T	C	C	C	C	#REF!
Y	16572484	7 to 8	T	C	T	T	T	C	T	T	C	T	T	T	T	T	T	T	#REF!
Y	16576380	7 to GGG_Tzambo	C	A	C	C	C	C	C	C	C	C	C	A	C	C	C	C	#REF!
Y	16579257	1 to 2	A	G	A	A	A	A	G	G	A	A	A	A	G	G	G	G	#REF!
Y	16579944	1 to 6	T	G	T	G	G	G	T	T	G	G	G	G	T	T	T	T	#REF!
Y	16581125	1 to 6	C	G	C	G	G	G	C	C	G	G	G	G	C	C	C	C	#REF!
Y	16584223	1 to 6	A	G	A	G	G	G	A	A	G	G	G	G	A	A	A	A	#REF!
Y	16589432	7 to 8	C	T	C	C	C	T	C	C	T	C	C	C	C	C	C	C	#REF!
Y	16596622	7 to GGG_Tzambo	A	C	A	A	A	A	A	A	A	A	A	C	A	A	A	A	#REF!
Y	16600418	2 to 3	C	A	C	C	C	C	A	C	C	C	C	C	A	A	A	C	#REF!
Y	16605111	2 to 5	A	C	A	A	A	A	A	C	A	A	A	A	A	A	A	C	#REF!
Y	16608980	7 to 8	C	A	C	C	C	A	C	C	A	C	C	C	C	C	C	C	#REF!
Y	16614132	9 to 10	C	T	C	T	C	C	C	C	C	C	T	C	C	C	C	C	#REF!
Y	16615943	1 to 6	G	C	G	C	C	C	G	G	C	C	C	C	G	G	G	G	#REF!
Y	16626123	7 to GGG_Tzambo	A	C	A	A	A	A	A	A	A	A	A	C	A	A	A	A	#REF!
Y	16626373	1 to 6	A	T	A	T	T	T	A	A	T	T	T	T	A	A	A	A	#REF!
Y	16626849	9 to 11	T	C	T	T	C	T	T	T	T	C	T	T	T	T	T	T	#REF!
Y	16649543	2 to 5	C	A	C	C	C	C	C	A	C	C	C	C	C	C	C	A	#REF!
Y	16655074	1 to 6	C	A	C	A	A	A	C	C	A	A	A	A	C	C	C	C	#REF!
Y	16655723	7 to 8	C	T	C	C	C	T	C	C	T	C	C	C	C	C	C	C	#REF!
Y	16659792	9 to 11	G	T	G	G	T	G	G	G	G	T	G	G	G	G	G	G	#REF!
Y	16667192	9 to 11	G	T	G	G	T	G	G	G	G	T	G	G	G	G	G	G	#REF!
Y	16669631	7 to 8	G	A	G	G	G	A	G	G	A	G	G	G	G	G	G	G	#REF!
Y	16671022	7 to 8	T	C	T	T	T	C	T	T	C	T	T	T	T	T	T	T	#REF!
Y	16671228	9 to 11	A	G	A	A	G	A	A	A	A	G	A	A	A	A	A	A	#REF!
Y	16672122	9 to 10	G	A	G	A	G	G	G	G	G	G	A	G	G	G	G	G	#REF!
Y	16690256	5 to GBG_Kaisi	A	G	A	A	A	A	A	G	A	A	A	A	A	A	A	A	#REF!
Y	16695260	1 to 6	G	A	G	A	A	A	G	G	A	A	A	A	G	G	G	G	#REF!
Y	16696472	9 to 10	C	A	C	A	C	C	C	C	C	C	A	C	C	C	C	C	#REF!
Y	16696553	1 to 6	T	G	T	G	G	G	T	T	G	G	G	G	T	T	T	T	#REF!
Y	16698128	7 to GGG_Tzambo	A	G	A	A	A	A	A	A	A	A	A	G	A	A	A	A	#REF!
Y	16711543	7 to 8	A	C	A	A	A	C	A	A	C	A	A	A	A	A	A	A	#REF!
Y	16711615	1 to 2	G	C,T	C	C	C	C	T	T	C	C	C	C	T	T	T	T	#REF!
Y	16733321	9 to 11	C	T	C	C	T	C	C	C	C	T	C	C	C	C	C	C	#REF!
Y	16734602	1 to 6	A	G	A	G	G	G	A	A	G	G	G	G	A	A	A	A	#REF!
Y	16742075	1 to 2	G	T	G	G	G	G	T	T	G	G	G	G	T	T	T	T	#REF!
Y	16743963	6 to 9	G	C	G	C	C	G	G	G	G	C	C	G	G	G	G	G	#REF!
Y	16744775	7 to 8	G	A	G	G	G	A	G	G	A	G	G	G	G	G	G	G	#REF!
Y	16747070	6 to 7	T	C	T	T	T	C	T	T	C	T	T	C	T	T	T	T	#REF!
Y	16748706	7 to GGG_Tzambo	T	C	T	T	T	T	T	T	T	T	T	C	T	T	T	T	#REF!
Y	16750310	1 to 2	G	A	G	G	G	G	A	A	G	G	G	G	A	A	A	A	#REF!
Y	16750317	1 to 6	G	A	G	A	A	A	G	G	A	A	A	A	G	G	G	G	#REF!
Y	16752160	9 to 10	G	A	G	A	G	G	G	G	G	G	A	G	G	G	G	G	#REF!
Y	16752668	8 to GGG_Nikumba	G	T	G	G	G	T	G	G	G	G	G	G	G	G	G	G	#REF!
Y	16752754	9 to 11	G	A	G	G	A	G	G	G	G	A	G	G	G	G	G	G	#REF!
Y	16754454	2 to 3	T	C	T	T	T	T	C	T	T	T	T	T	C	C	C	T	#REF!
Y	16755845	9 to 11	A	G	A	A	G	A	A	A	A	G	A	A	A	A	A	A	#REF!
Y	16756118	7 to 8	A	G	A	A	A	G	A	A	G	A	A	A	A	A	A	A	#REF!
Y	16760871	11 to GGG_Guy	C	A	C	C	A	C	C	C	C	C	C	C	C	C	C	C	#REF!
Y	16765035	1 to 2	A	G	A	A	A	A	G	G	A	A	A	A	G	G	G	G	#REF!
Y	16766922	7 to 8	T	A	T	T	T	A	T	T	A	T	T	T	T	T	T	T	#REF!
Y	16768147	1 to 6	C	T	C	T	T	T	C	C	T	T	T	T	C	C	C	C	#REF!
Y	16768323	11 to GGG_Banjo	T	C	T	T	T	T	T	T	T	C	T	T	T	T	T	T	#REF!
Y	16775945	9 to 10	A	G	A	G	A	A	A	A	A	A	G	A	A	A	A	A	#REF!
Y	16779705	7 to GGG_Tzambo	T	A	T	T	T	T	T	T	T	T	T	A	T	T	T	T	#REF!
Y	16780228	7 to GGG_Tzambo	T	A	T	T	T	T	T	T	T	T	T	A	T	T	T	T	#REF!
Y	16786943	1 to 2	T	G	T	T	T	T	G	G	T	T	T	T	G	G	G	G	#REF!
Y	16789471	1 to 6	G	C	G	C	C	C	G	G	C	C	C	C	G	G	G	G	#REF!
Y	16790521	2 to 5	G	C	G	G	G	G	G	C	G	G	G	G	G	G	G	C	#REF!
Y	16793271	2 to 5	G	C	G	G	G	G	G	C	G	G	G	G	G	G	G	C	#REF!
Y	16793533	2 to 3	G	C	G	G	G	G	C	G	G	G	G	G	C	C	C	G	#REF!
Y	16793679	2 to 3	G	A	G	G	G	G	A	G	G	G	G	G	A	A	A	G	#REF!
Y	16793680	2 to 3	G	A	G	G	G	G	A	G	G	G	G	G	A	A	A	G	#REF!
Y	16796606	1 to 2	G	A	G	G	G	G	A	A	G	G	G	G	A	A	A	A	#REF!
Y	16806370	1 to 6	A	G	G	A	A	A	G	G	A	A	A	A	G	G	G	G	#REF!
Y	16808372	7 to 8	C	A	C	C	C	A	C	C	A	C	C	C	C	C	C	C	#REF!
Y	16811257	1 to 2	A	G	A	A	A	A	G	G	A	A	A	A	G	G	G	G	#REF!
Y	16811328	9 to 10	C	G	C	G	C	C	C	C	C	C	G	C	C	C	C	C	#REF!
Y	16813055	1 to 6	T	C	C	T	T	T	C	C	T	T	T	T	C	C	C	C	#REF!
Y	16824902	7 to 8	A	G	A	A	A	G	A	A	G	A	A	A	A	A	A	A	#REF!
Y	16839151	2 to 5	T	C	T	T	T	T	T	C	T	T	T	T	T	T	T	C	#REF!
Y	16839704	1 to 6	C	G	C	G	G	G	C	C	G	G	G	G	C	C	C	C	#REF!
Y	16841129	2 to 5	T	A	T	T	T	T	T	A	T	T	T	T	T	T	T	A	#REF!
Y	16844416	7 to GGG_Tzambo	C	T	C	C	C	C	C	C	C	C	C	T	C	C	C	C	#REF!
Y	16845645	1 to ancestral; 9 to 11	G	A	G	A	G	A	A	A	A	G	A	A	A	A	A	A	#REF!
Y	16846500	9 to 11	T	C,A	C	C	A	C	C	C	C	A	C	C	C	C	C	C	#REF!
Y	16849009	1 to 6	T	C	C	T	T	T	C	C	T	T	T	T	C	C	C	C	#REF!
Y	16851906	1 to 2	C	T	C	C	C	C	T	T	C	C	C	C	T	T	T	T	#REF!
Y	16852096	1 to 2	C	T	T	T	T	T	C	C	T	T	T	T	C	C	C	C	#REF!
Y	16853245	1 to 6	T	C	T	C	C	C	T	T	C	C	C	C	T	T	T	T	#REF!
Y	16855724	1 to 6	T	A	T	A	A	A	T	T	A	A	A	A	T	T	T	T	#REF!
Y	16861057	7 to 8	T	C	T	T	T	C	T	T	C	T	T	T	T	T	T	T	#REF!
Y	16861378	7 to 8	T	G	T	T	T	G	T	T	G	T	T	T	T	T	T	T	#REF!
Y	16861409	7 to GGG_Tzambo	G	T	G	G	G	G	G	G	G	G	G	T	G	G	G	G	#REF!
Y	16869475	2 to 3	T	C	T	T	T	T	C	T	T	T	T	T	C	C	C	T	#REF!
Y	16869534	1 to 6	G	A	G	A	A	A	G	G	A	A	A	A	G	G	G	G	#REF!
Y	16871006	9 to 11	T	A	T	T	A	T	T	T	T	A	T	T	T	T	T	T	#REF!
Y	16875586	6 to 7	A	G	A	A	A	G	A	A	G	A	A	G	A	A	A	A	#REF!
Y	16878385	7 to 8	T	C	T	T	T	C	T	T	C	T	T	T	T	T	T	T	#REF!
Y	16880272	11 to GGG_Guy	T	C	T	T	C	T	T	T	T	T	T	T	T	T	T	T	#REF!
Y	16880795	2 to 3	T	C	T	T	T	T	C	T	T	T	T	T	C	C	C	T	#REF!
Y	16887251	9 to 11	C	T	C	C	T	C	C	C	C	T	C	C	C	C	C	C	#REF!
Y	16890380	6 to 7	C	T	C	C	C	T	C	C	T	C	C	T	C	C	C	C	#REF!
Y	16900555	6 to 9	T	A	T	A	A	T	T	T	T	A	A	T	T	T	T	T	#REF!
Y	16902053	8 to GGG_Nikumba	C	T	C	C	C	T	C	C	C	C	C	C	C	C	C	C	#REF!
Y	16902731	7 to GGG_Tzambo	T	G	T	T	T	T	T	T	T	T	T	G	T	T	T	T	#REF!
Y	16903089	1 to 2	G	C	G	G	G	G	C	C	G	G	G	G	C	C	C	C	#REF!
Y	16903767	9 to 10	G	A	G	A	G	G	G	G	G	G	A	G	G	G	G	G	#REF!
Y	16904396	9 to 11	A	T	A	A	T	A	A	A	A	T	A	A	A	A	A	A	#REF!
Y	16904998	2 to 5	G	A	G	G	G	G	G	A	G	G	G	G	G	G	G	A	#REF!
Y	16905904	1 to 6	T	C	T	C	C	C	T	T	C	C	C	C	T	T	T	T	#REF!
Y	16907922	1 to 2	C	T	C	C	C	C	T	T	C	C	C	C	T	T	T	T	#REF!
Y	16911926	8 to GGG_Nikumba	T	C	T	T	T	C	T	T	T	T	T	T	T	T	T	T	#REF!
Y	16920484	1 to 2	C	G	C	C	C	C	G	G	C	C	C	C	G	G	G	G	#REF!
Y	16921006	8 to GGG_Nikumba	C	T	C	C	C	T	C	C	C	C	C	C	C	C	C	C	#REF!
Y	16921012	8 to GGG_Nikumba	C	T	C	C	C	T	C	C	C	C	C	C	C	C	C	C	#REF!
Y	16939506	11 to GGG_Guy	A	G	A	A	G	A	A	A	A	A	A	A	A	A	A	A	#REF!
Y	16941334	9 to 10	C	T	C	T	C	C	C	C	C	C	T	C	C	C	C	C	#REF!
Y	16946196	2 to 5	A	T	A	A	A	A	A	T	A	A	A	A	A	A	A	T	#REF!
Y	16949468	6 to 9	A	C	A	C	C	A	A	A	A	C	C	A	A	A	A	A	#REF!
Y	16949630	1 to 2	A	G	A	A	A	A	G	G	A	A	A	A	G	G	G	G	#REF!
Y	16950962	1 to 2	C	T	C	C	C	C	T	T	C	C	C	C	T	T	T	T	#REF!
Y	16958072	2 to 5	G	A	G	G	G	G	G	A	G	G	G	G	G	G	G	A	#REF!
Y	16959575	1 to ancestral; 1 to 6; 2 to 3; 2 to 5	T	C	T	C	C	C	T	C	C	C	C	C	T	T	T	C	#REF!
Y	16960120	2 to 5	G	C	G	G	G	G	G	C	G	G	G	G	G	G	G	C	#REF!
Y	16963834	1 to 2	C	A	C	C	C	C	A	A	C	C	C	C	A	A	A	A	#REF!
Y	16969927	6 to 9	A	G	A	G	G	A	A	A	A	G	G	A	A	A	A	A	#REF!
Y	16989116	6 to 9	G	A	G	A	A	G	G	G	G	A	A	G	G	G	G	G	#REF!
Y	17005007	7 to 8	C	A	C	C	C	A	C	C	A	C	C	C	C	C	C	C	#REF!
Y	17006987	2 to 3	G	A	G	G	G	G	A	G	G	G	G	G	A	A	A	G	#REF!
Y	17008467	9 to 11	G	A	G	G	A	G	G	G	G	A	G	G	G	G	G	G	#REF!
Y	17009350	9 to 11	T	A	T	T	A	T	T	T	T	A	T	T	T	T	T	T	#REF!
Y	17010526	9 to 10	A	G	A	G	A	A	A	A	A	A	G	A	A	A	A	A	#REF!
Y	17010788	7 to 8	A	G	A	A	A	G	A	A	G	A	A	A	A	A	A	A	#REF!
Y	17012239	7 to 8	A	G	A	A	A	G	A	A	G	A	A	A	A	A	A	A	#REF!
Y	17015022	1 to 6	C	T	T	C	C	C	T	T	C	C	C	C	T	T	T	T	#REF!
Y	17016722	9 to 11	G	C	G	G	C	G	G	G	G	C	G	G	G	G	G	G	#REF!
Y	17166543	2 to 5	C	T	C	C	C	C	C	T	C	C	C	C	C	C	C	T	#REF!
Y	17171045	1 to 2	G	A	G	G	G	G	A	A	G	G	G	G	A	A	A	A	#REF!
Y	17173114	2 to 3	A	T	A	A	A	A	T	A	A	A	A	A	T	T	T	A	#REF!
Y	17177608	1 to 2	A	G	A	A	A	A	G	G	A	A	A	A	G	G	G	G	#REF!
Y	17179915	1 to 6	G	A	G	A	A	A	G	G	A	A	A	A	G	G	G	G	#REF!
Y	17820291	7 to GGG_Tzambo	T	C	T	T	T	T	T	T	T	T	T	C	T	T	T	T	#REF!
Y	17820350	1 to 6	A	G	A	G	G	G	A	A	G	G	G	G	A	A	A	A	#REF!
Y	17820898	2 to 3	C	A	C	C	C	C	A	C	C	C	C	C	A	A	A	C	#REF!
Y	17821602	9 to 10	T	C	T	C	T	T	T	T	T	T	C	T	T	T	T	T	#REF!
Y	17831446	7 to GGG_Tzambo	C	G	C	C	C	C	C	C	C	C	C	G	C	C	C	C	#REF!
Y	17831960	1 to 6	T	C	T	C	C	C	T	T	C	C	C	C	T	T	T	T	#REF!
Y	17841191	1 to 6	G	A	A	G	G	G	A	A	G	G	G	G	A	A	A	A	#REF!
Y	17841224	9 to 10	C	G,A	G	A	G	G	G	G	G	G	A	G	G	G	G	G	#REF!
Y	17841419	11 to GGG_Guy	T	C	T	T	C	T	T	T	T	T	T	T	T	T	T	T	#REF!
Y	17843871	9 to 10	A	G	A	G	A	A	A	A	A	A	G	A	A	A	A	A	#REF!
Y	17844264	7 to GGG_Tzambo	C	T	C	C	C	C	C	C	C	C	C	T	C	C	C	C	#REF!
Y	17845398	1 to 2	A	G	A	A	A	A	G	G	A	A	A	A	G	G	G	G	#REF!
Y	17847207	9 to 11	A	G	A	A	G	A	A	A	A	G	A	A	A	A	A	A	#REF!
Y	17853092	9 to 11	A	C	A	A	C	A	A	A	A	C	A	A	A	A	A	A	#REF!
Y	17863065	6 to 9	C	G	C	G	G	C	C	C	C	G	G	C	C	C	C	C	#REF!
Y	17863071	8 to GGG_Nikumba	C	T	C	C	C	T	C	C	C	C	C	C	C	C	C	C	#REF!
Y	17866271	1 to 2	A	G,T	G	G	G	G	T	T	G	G	G	G	T	T	T	T	#REF!
Y	17867783	1 to 6	C	A	C	A	A	A	C	C	A	A	A	A	C	C	C	C	#REF!
Y	17869997	9 to 11	T	C	T	T	C	T	T	T	T	C	T	T	T	T	T	T	#REF!
Y	17870753	9 to 11	A	G	A	A	G	A	A	A	A	G	A	A	A	A	A	A	#REF!
Y	17873367	6 to 7	T	C	T	T	T	C	T	T	C	T	T	C	T	T	T	T	#REF!
Y	17877117	7 to GGG_Tzambo	C	G	C	C	C	C	C	C	C	C	C	G	C	C	C	C	#REF!
Y	17877801	1 to 2	T	A	T	T	T	T	A	A	T	T	T	T	A	A	A	A	#REF!
Y	17878813	1 to 6	A	G	G	A	A	A	G	G	A	A	A	A	G	G	G	G	#REF!
Y	17880891	9 to 11	C	T	C	C	T	C	C	C	C	T	C	C	C	C	C	C	#REF!
Y	17882057	1 to 2	A	G	A	A	A	A	G	G	A	A	A	A	G	G	G	G	#REF!
Y	17882220	1 to 6	G	A	G	A	A	A	G	G	A	A	A	A	G	G	G	G	#REF!
Y	17887992	9 to 11	C	T	C	C	T	C	C	C	C	T	C	C	C	C	C	C	#REF!
Y	17889155	7 to 8	T	C	T	T	T	C	T	T	C	T	T	T	T	T	T	T	#REF!
Y	17889556	7 to GGG_Tzambo	T	A	T	T	T	T	T	T	T	T	T	A	T	T	T	T	#REF!
Y	17893925	5 to GBG_Kaisi	T	C	T	T	T	T	T	C	T	T	T	T	T	T	T	T	#REF!
Y	17909212	9 to 11	G	A	G	G	A	G	G	G	G	A	G	G	G	G	G	G	#REF!
Y	17913938	9 to 11	A	T	A	A	T	A	A	A	A	T	A	A	A	A	A	A	#REF!
Y	17914866	1 to 2	G	A	G	G	G	G	A	A	G	G	G	G	A	A	A	A	#REF!
Y	17921585	9 to 10	G	A	G	A	G	G	G	G	G	G	A	G	G	G	G	G	#REF!
Y	17925465	1 to 6	C	A	C	A	A	A	C	C	A	A	A	A	C	C	C	C	#REF!
Y	17926279	7 to GGG_Tzambo	C	T	C	C	C	C	C	C	C	C	C	T	C	C	C	C	#REF!
Y	17936279	1 to 2	G	A	G	G	G	G	A	A	G	G	G	G	A	A	A	A	#REF!
Y	17945584	1 to 6	G	A	G	A	A	A	G	G	A	A	A	A	G	G	G	G	#REF!
Y	17947438	1 to 2	G	A	G	G	G	G	A	A	G	G	G	G	A	A	A	A	#REF!
Y	17958787	9 to 10	C	T	C	T	C	C	C	C	C	C	T	C	C	C	C	C	#REF!
Y	17961166	1 to 2	C	T	C	C	C	C	T	T	C	C	C	C	T	T	T	T	#REF!
Y	17973633	9 to 10	A	G	A	G	A	A	A	A	A	A	G	A	A	A	A	A	#REF!
Y	17975007	1 to 2	G	T	G	G	G	G	T	T	G	G	G	G	T	T	T	T	#REF!
Y	17975934	9 to 11	A	G	G	G	A	G	G	G	G	A	G	G	G	G	G	G	#REF!
Y	17979661	2 to 5	C	T	C	C	C	C	C	T	C	C	C	C	C	C	C	T	#REF!
Y	17980440	6 to 9	G	A	G	A	A	G	G	G	G	A	A	G	G	G	G	G	#REF!
Y	17981182	7 to GGG_Tzambo	C	T	C	C	C	C	C	C	C	C	C	T	C	C	C	C	#REF!
Y	17983085	1 to 6	A	C	A	C	C	C	A	A	C	C	C	C	A	A	A	A	#REF!
Y	17985489	1 to 2	C	A	C	C	C	C	A	A	C	C	C	C	A	A	A	A	#REF!
Y	17985938	7 to 8	A	T	A	A	A	T	A	A	T	A	A	A	A	A	A	A	#REF!
Y	18017731	7 to 8	C	G,A	G	G	G	A	G	G	A	G	G	G	G	G	G	G	#REF!
Y	18023190	1 to 2	C	T	C	C	C	C	T	T	C	C	C	C	T	T	T	T	#REF!
Y	18026559	6 to 7	A	G	A	A	A	G	A	A	G	A	A	G	A	A	A	A	#REF!
Y	18028613	9 to 10	C	G,A	G	A	G	G	G	G	G	G	A	G	G	G	G	G	#REF!
Y	18034044	9 to 11	A	G	A	A	G	A	A	A	A	G	A	A	A	A	A	A	#REF!
Y	18034083	2 to 5	C	G	C	C	C	C	C	G	C	C	C	C	C	C	C	G	#REF!
Y	18035168	7 to 8	C	G	C	C	C	G	C	C	G	C	C	C	C	C	C	C	#REF!
Y	18084509	1 to 2	A	T	A	A	A	A	T	T	A	A	A	A	T	T	T	T	#REF!
Y	18096873	1 to 6	T	C	T	C	C	C	T	T	C	C	C	C	T	T	T	T	#REF!
Y	18099282	2 to 3	G	A	G	G	G	G	A	G	G	G	G	G	A	A	A	G	#REF!
Y	18099458	2 to 3	G	A	G	G	G	G	A	G	G	G	G	G	A	A	A	G	#REF!
Y	18106258	7 to GGG_Tzambo	G	A	G	G	G	G	G	G	G	G	G	A	G	G	G	G	#REF!
Y	18106265	11 to GGG_Guy	C	G	C	C	G	C	C	C	C	C	C	C	C	C	C	C	#REF!
Y	18110258	9 to 11	A	G	A	A	G	A	A	A	A	G	A	A	A	A	A	A	#REF!
Y	18111499	1 to 2	C	T	C	C	C	C	T	T	C	C	C	C	T	T	T	T	#REF!
Y	18111785	11 to GGG_Guy	A	T	A	A	T	A	A	A	A	A	A	A	A	A	A	A	#REF!
Y	18122394	1 to 2	G	T	G	G	G	G	T	T	G	G	G	G	T	T	T	T	#REF!
Y	18127174	2 to 3	T	C	T	T	T	T	C	T	T	T	T	T	C	C	C	T	#REF!
Y	18145145	2 to 3	C	T	C	C	C	C	T	C	C	C	C	C	T	T	T	C	#REF!
Y	18145365	7 to GGG_Tzambo	G	A	G	G	G	G	G	G	G	G	G	A	G	G	G	G	#REF!
Y	18146670	8 to GGG_Azizi	T	A	T	T	T	T	T	T	A	T	T	T	T	T	T	T	#REF!
Y	18151481	7 to 8	C	T	C	C	C	T	C	C	T	C	C	C	C	C	C	C	#REF!
Y	18155614	9 to 10	C	T	C	T	C	C	C	C	C	C	T	C	C	C	C	C	#REF!
Y	18155615	9 to 10	T	A	T	A	T	T	T	T	T	T	A	T	T	T	T	T	#REF!
Y	18162064	2 to 5	C	G,T	G	G	G	G	G	T	G	G	G	G	G	G	G	T	#REF!
Y	18163434	1 to 2	A	T	A	A	A	A	T	T	A	A	A	A	T	T	T	T	#REF!
Y	18168615	6 to 9	A	G	A	G	G	A	A	A	A	G	G	A	A	A	A	A	#REF!
Y	18207322	7 to 8	G	T	G	G	G	T	G	G	T	G	G	G	G	G	G	G	#REF!
Y	18210698	7 to 8	A	G	A	A	A	G	A	A	G	A	A	A	A	A	A	A	#REF!
Y	18213024	10 to GGG_Fritz	C	T	C	T	C	C	C	C	C	C	C	C	C	C	C	C	#REF!
Y	18216613	9 to 11	A	C	A	A	C	A	A	A	A	C	A	A	A	A	A	A	#REF!
Y	18217235	2 to 5	C	T	C	C	C	C	C	T	C	C	C	C	C	C	C	T	#REF!
Y	18217981	1 to 6	T	C	T	C	C	C	T	T	C	C	C	C	T	T	T	T	#REF!
Y	18222605	6 to 9	A	C	A	C	C	A	A	A	A	C	C	A	A	A	A	A	#REF!
Y	18245461	6 to 9	C	T	C	T	T	C	C	C	C	T	T	C	C	C	C	C	#REF!
Y	18251223	8 to GGG_Azizi	C	T	C	C	C	C	C	C	T	C	C	C	C	C	C	C	#REF!
Y	18254583	1 to 2	C	A	C	C	C	C	A	A	C	C	C	C	A	A	A	A	#REF!
Y	18255518	9 to 10	C	G	C	G	C	C	C	C	C	C	G	C	C	C	C	C	#REF!
Y	18256993	11 to GGG_Guy	G	C	G	G	C	G	G	G	G	G	G	G	G	G	G	G	#REF!
Y	18259743	2 to 5	A	G	A	A	A	A	A	G	A	A	A	A	A	A	A	G	#REF!
Y	18265881	1 to 2	A	G	A	A	A	A	G	G	A	A	A	A	G	G	G	G	#REF!
Y	19008949	2 to 3	A	G	A	A	A	A	G	A	A	A	A	A	G	G	G	A	#REF!
Y	19011903	2 to 3	C	A	C	C	C	C	A	C	C	C	C	C	A	A	A	C	#REF!
Y	19023663	8 to GGG_Nikumba	A	G	A	A	A	G	A	A	A	A	A	A	A	A	A	A	#REF!
Y	19034814	7 to GGG_Tzambo	G	A	G	G	G	G	G	G	G	G	G	A	G	G	G	G	#REF!
Y	19035265	9 to 11	C	T	C	C	T	C	C	C	C	T	C	C	C	C	C	C	#REF!
Y	19046180	1 to 2	C	G	C	C	C	C	G	G	C	C	C	C	G	G	G	G	#REF!
Y	19046395	9 to 10	C	T	C	T	C	C	C	C	C	C	T	C	C	C	C	C	#REF!
Y	19046705	9 to 10	T	C	T	C	T	T	T	T	T	T	C	T	T	T	T	T	#REF!
Y	19046725	1 to 2	C	T	C	C	C	C	T	T	C	C	C	C	T	T	T	T	#REF!
Y	19049427	1 to 6	G	A	G	A	A	A	G	G	A	A	A	A	G	G	G	G	#REF!
Y	19077424	1 to 6	T	C	T	C	C	C	T	T	C	C	C	C	T	T	T	T	#REF!
Y	19078804	7 to GGG_Tzambo	T	A	T	T	T	T	T	T	T	T	T	A	T	T	T	T	#REF!
Y	19080192	9 to 10	C	T	C	T	C	C	C	C	C	C	T	C	C	C	C	C	#REF!
Y	19087610	6 to 7	G	T	G	G	G	T	G	G	T	G	G	T	G	G	G	G	#REF!
Y	19089945	6 to 9	T	C	T	C	C	T	T	T	T	C	C	T	T	T	T	T	#REF!
Y	19094385	11 to GGG_Guy	T	C	T	T	C	T	T	T	T	T	T	T	T	T	T	T	#REF!
Y	19103456	7 to GGG_Tzambo	C	A	C	C	C	C	C	C	C	C	C	A	C	C	C	C	#REF!
Y	19107719	1 to 6	C	T	C	T	T	T	C	C	T	T	T	T	C	C	C	C	#REF!
Y	19109537	9 to 10	G	T	G	T	G	G	G	G	G	G	T	G	G	G	G	G	#REF!
Y	19110916	1 to ancestral; 9 to 11	T	C	T	C	T	C	C	C	C	T	C	C	C	C	C	C	#REF!
Y	19111040	1 to 6	A	C	A	C	C	C	A	A	C	C	C	C	A	A	A	A	#REF!
Y	19111334	7 to 8	C	T	C	C	C	T	C	C	T	C	C	C	C	C	C	C	#REF!
Y	19113613	11 to GGG_Guy	A	G	A	A	G	A	A	A	A	A	A	A	A	A	A	A	#REF!
Y	19116745	1 to 2	T	C	T	T	T	T	C	C	T	T	T	T	C	C	C	C	#REF!
Y	19122230	2 to 3	G	C,T	C	C	C	C	T	C	C	C	C	C	T	T	T	C	#REF!
Y	19122540	1 to 6	A	C	A	C	C	C	A	A	C	C	C	C	A	A	A	A	#REF!
Y	19126019	9 to 10	G	C,A	C	A	C	C	C	C	C	C	A	C	C	C	C	C	#REF!
Y	19126704	7 to GGG_Tzambo	T	A	T	T	T	T	T	T	T	T	T	A	T	T	T	T	#REF!
Y	19132180	1 to 2	A	G	A	A	A	A	G	G	A	A	A	A	G	G	G	G	#REF!
Y	19133338	1 to 6	T	C	T	C	C	C	T	T	C	C	C	C	T	T	T	T	#REF!
Y	19134448	9 to 10	T	C	T	C	T	T	T	T	T	T	C	T	T	T	T	T	#REF!
Y	19137011	1 to 6	C	T	C	T	T	T	C	C	T	T	T	T	C	C	C	C	#REF!
Y	19250565	9 to 11	G	T	G	G	T	G	G	G	G	T	G	G	G	G	G	G	#REF!
Y	19254693	1 to 2	T	C	T	T	T	T	C	C	T	T	T	T	C	C	C	C	#REF!
Y	19254811	7 to 8	C	T	C	C	C	T	C	C	T	C	C	C	C	C	C	C	#REF!
Y	19255621	8 to GGG_Azizi	C	T	C	C	C	C	C	C	T	C	C	C	C	C	C	C	#REF!
Y	19259776	1 to 2	C	G	C	C	C	C	G	G	C	C	C	C	G	G	G	G	#REF!
Y	19260216	1 to 6	C	T	C	T	T	T	C	C	T	T	T	T	C	C	C	C	#REF!
Y	19261076	9 to 10	G	A	G	A	G	G	G	G	G	G	A	G	G	G	G	G	#REF!
Y	19263916	9 to 10	G	A	G	A	G	G	G	G	G	G	A	G	G	G	G	G	#REF!
Y	19266199	6 to 9	C	G	C	G	G	C	C	C	C	G	G	C	C	C	C	C	#REF!
Y	19269224	1 to 6	A	G	A	G	G	G	A	A	G	G	G	G	A	A	A	A	#REF!
Y	19274181	7 to 8	T	A	T	T	T	A	T	T	A	T	T	T	T	T	T	T	#REF!
Y	19275947	9 to 10	G	A	G	A	G	G	G	G	G	G	A	G	G	G	G	G	#REF!
Y	19280524	9 to 10	G	A	G	A	G	G	G	G	G	G	A	G	G	G	G	G	#REF!
Y	19281041	1 to ancestral; 1 to 6; 2 to 3; 2 to 5	A	G	A	G	G	G	A	G	G	G	G	G	A	A	A	G	#REF!
Y	19282489	7 to 8	C	A,G	A	A	A	G	A	A	G	A	A	A	A	A	A	A	#REF!
Y	19286146	7 to GGG_Tzambo	A	T	A	A	A	A	A	A	A	A	A	T	A	A	A	A	#REF!
Y	19286427	1 to 2	A	G	A	A	A	A	G	G	A	A	A	A	G	G	G	G	#REF!
Y	19291637	9 to 10	C	A	C	A	C	C	C	C	C	C	A	C	C	C	C	C	#REF!
Y	19294287	1 to 6	T	A	T	A	A	A	T	T	A	A	A	A	T	T	T	T	#REF!
Y	19294855	1 to 6	G	A	G	A	A	A	G	G	A	A	A	A	G	G	G	G	#REF!
Y	19294878	7 to 8	A	G	A	A	A	G	A	A	G	A	A	A	A	A	A	A	#REF!
Y	19296598	1 to 2	G	A	G	G	G	G	A	A	G	G	G	G	A	A	A	A	#REF!
Y	19316158	11 to GGG_Banjo	T	G	T	T	T	T	T	T	T	G	T	T	T	T	T	T	#REF!
Y	19316218	2 to 5	G	A	G	G	G	G	G	A	G	G	G	G	G	G	G	A	#REF!
Y	19321949	1 to 6	C	T	C	T	T	T	C	C	T	T	T	T	C	C	C	C	#REF!
Y	19333903	9 to 10	T	C	T	C	T	T	T	T	T	T	C	T	T	T	T	T	#REF!
Y	19334775	9 to 11	C	T	C	C	T	C	C	C	C	T	C	C	C	C	C	C	#REF!
Y	19356841	1 to 2	G	T	G	G	G	G	T	T	G	G	G	G	T	T	T	T	#REF!
Y	19358283	4 to GBB_Imfura	G	T	G	G	G	G	G	G	G	G	G	G	T	G	G	G	#REF!
Y	19360740	9 to 11	C	T	C	C	T	C	C	C	C	T	C	C	C	C	C	C	#REF!
Y	19365414	1 to 2	A	T	A	A	A	A	T	T	A	A	A	A	T	T	T	T	#REF!
Y	19366292	11 to GGG_Banjo	A	G	A	A	A	A	A	A	A	G	A	A	A	A	A	A	#REF!
Y	19367571	7 to 8	G	A	G	G	G	A	G	G	A	G	G	G	G	G	G	G	#REF!
Y	19372228	9 to 11	G	A	G	G	A	G	G	G	G	A	G	G	G	G	G	G	#REF!
Y	19374099	7 to GGG_Tzambo	G	A	G	G	G	G	G	G	G	G	G	A	G	G	G	G	#REF!
Y	19374375	7 to 8	C	A	C	C	C	A	C	C	A	C	C	C	C	C	C	C	#REF!
Y	19379800	6 to 7	T	C	T	T	T	C	T	T	C	T	T	C	T	T	T	T	#REF!
Y	19380486	2 to 5	C	T	C	C	C	C	C	T	C	C	C	C	C	C	C	T	#REF!
Y	19384050	3 to GBG_Mkubwa; 5 to GBG_Kaisi	A	G	A	A	A	A	G	G	A	A	A	A	A	A	A	A	#REF!
Y	19384446	1 to 2	G	A	G	G	G	G	A	A	G	G	G	G	A	A	A	A	#REF!
Y	19388809	9 to 10	G	A	G	A	G	G	G	G	G	G	A	G	G	G	G	G	#REF!
Y	19390250	1 to 2	A	G	A	A	A	A	G	G	A	A	A	A	G	G	G	G	#REF!
Y	19395436	1 to 2	A	G	A	A	A	A	G	G	A	A	A	A	G	G	G	G	#REF!
Y	19397440	1 to 6	T	C	T	C	C	C	T	T	C	C	C	C	T	T	T	T	#REF!
Y	19401042	2 to 5	A	T	A	A	A	A	A	T	A	A	A	A	A	A	A	T	#REF!
Y	19401579	1 to 6	A	T	A	T	T	T	A	A	T	T	T	T	A	A	A	A	#REF!
Y	19403206	2 to 5	A	T	A	A	A	A	A	T	A	A	A	A	A	A	A	T	#REF!
Y	19405009	1 to 2	G	A	G	G	G	G	A	A	G	G	G	G	A	A	A	A	#REF!
Y	19407681	1 to 6	C	T	C	T	T	T	C	C	T	T	T	T	C	C	C	C	#REF!
Y	19408082	1 to 2	A	G	A	A	A	A	G	G	A	A	A	A	G	G	G	G	#REF!
Y	19411384	7 to GGG_Tzambo	C	T	C	C	C	C	C	C	C	C	C	T	C	C	C	C	#REF!
Y	19422443	7 to GGG_Tzambo	A	G	A	A	A	A	A	A	A	A	A	G	A	A	A	A	#REF!
Y	19442427	9 to 10	C	T	C	T	C	C	C	C	C	C	T	C	C	C	C	C	#REF!
Y	19442948	2 to 5	G	A	G	G	G	G	G	A	G	G	G	G	G	G	G	A	#REF!
Y	19445823	1 to 2	C	T	T	T	T	T	C	C	T	T	T	T	C	C	C	C	#REF!
Y	19452513	1 to 6	A	C	A	C	C	C	A	A	C	C	C	C	A	A	A	A	#REF!
Y	19455337	1 to 6	G	A	G	A	A	A	G	G	A	A	A	A	G	G	G	G	#REF!
Y	19466293	2 to 3	A	G	A	A	A	A	G	A	A	A	A	A	G	G	G	A	#REF!
Y	19466317	7 to 8	G	A	G	G	G	A	G	G	A	G	G	G	G	G	G	G	#REF!
Y	19469423	1 to 2	T	C	T	T	T	T	C	C	T	T	T	T	C	C	C	C	#REF!
Y	19470958	7 to GGG_Tzambo	C	G	C	C	C	C	C	C	C	C	C	G	C	C	C	C	#REF!
Y	19471691	9 to 11	T	G	T	T	G	T	T	T	T	G	T	T	T	T	T	T	#REF!
Y	19473965	9 to 10	A	G	A	G	A	A	A	A	A	A	G	A	A	A	A	A	#REF!
Y	19474208	2 to 5	C	T	C	C	C	C	C	T	C	C	C	C	C	C	C	T	#REF!
Y	19478785	1 to 2	G	T	G	G	G	G	T	T	G	G	G	G	T	T	T	T	#REF!
Y	19479829	7 to 8	A	T	A	A	A	T	A	A	T	A	A	A	A	A	A	A	#REF!
Y	19480044	7 to 8	G	T	G	G	G	T	G	G	T	G	G	G	G	G	G	G	#REF!
Y	19483028	9 to 10	A	G	A	G	A	A	A	A	A	A	G	A	A	A	A	A	#REF!
Y	19483747	1 to 2	A	G	A	A	A	A	G	G	A	A	A	A	G	G	G	G	#REF!
Y	19490202	11 to GGG_Banjo	C	T	C	C	C	C	C	C	C	T	C	C	C	C	C	C	#REF!
Y	19490380	2 to 5	G	A	G	G	G	G	G	A	G	G	G	G	G	G	G	A	#REF!
Y	19491143	1 to 6	T	C,G	G	C	C	C	G	G	C	C	C	C	G	G	G	G	#REF!
Y	19499892	9 to 11	G	C	G	G	C	G	G	G	G	C	G	G	G	G	G	G	#REF!
Y	19511319	9 to 10	G	T,A	T	A	T	T	T	T	T	T	A	T	T	T	T	T	#REF!
Y	19521807	9 to 11	A	G	A	A	G	A	A	A	A	G	A	A	A	A	A	A	#REF!
Y	19521863	8 to GGG_Nikumba	T	C	T	T	T	C	T	T	T	T	T	T	T	T	T	T	#REF!
Y	19524208	9 to 10	A	G	A	G	A	A	A	A	A	A	G	A	A	A	A	A	#REF!
Y	19558042	11 to GGG_Guy	T	C	T	T	C	T	T	T	T	T	T	T	T	T	T	T	#REF!
Y	19562896	1 to 2	G	A	G	G	G	G	A	A	G	G	G	G	A	A	A	A	#REF!
Y	19566616	6 to 9	G	A	G	A	A	G	G	G	G	A	A	G	G	G	G	G	#REF!
Y	21034383	1 to 2	C	T	T	T	T	T	C	C	T	T	T	T	C	C	C	C	#REF!
Y	21035497	1 to 6	G	A	A	G	G	G	A	A	G	G	G	G	A	A	A	A	#REF!
Y	21035686	2 to 3	G	A	G	G	G	G	A	G	G	G	G	G	A	A	A	G	#REF!
Y	21037141	7 to GGG_Tzambo	A	G	A	A	A	A	A	A	A	A	A	G	A	A	A	A	#REF!
Y	21043699	9 to 10	A	G	A	G	A	A	A	A	A	A	G	A	A	A	A	A	#REF!
Y	21043862	2 to 5	C	G	C	C	C	C	C	G	C	C	C	C	C	C	C	G	#REF!
Y	21046886	9 to 11	G	A	G	G	A	G	G	G	G	A	G	G	G	G	G	G	#REF!
Y	21051661	7 to 8	G	C	G	G	G	C	G	G	C	G	G	G	G	G	G	G	#REF!
Y	21052746	9 to 11	G	T	G	G	T	G	G	G	G	T	G	G	G	G	G	G	#REF!
Y	21054021	1 to 6	A	G	A	G	G	G	A	A	G	G	G	G	A	A	A	A	#REF!
Y	21065057	1 to 2	G	A	G	G	G	G	A	A	G	G	G	G	A	A	A	A	#REF!
Y	21065304	1 to 2	G	A	G	G	G	G	A	A	G	G	G	G	A	A	A	A	#REF!
Y	21067862	7 to 8	G	C	G	G	G	C	G	G	C	G	G	G	G	G	G	G	#REF!
Y	21069290	9 to 11	G	A	G	G	A	G	G	G	G	A	G	G	G	G	G	G	#REF!
Y	21070583	7 to GGG_Tzambo	T	C	T	T	T	T	T	T	T	T	T	C	T	T	T	T	#REF!
Y	21071104	6 to 9	C	T	C	T	T	C	C	C	C	T	T	C	C	C	C	C	#REF!
Y	21073976	1 to 6	T	C	T	C	C	C	T	T	C	C	C	C	T	T	T	T	#REF!
Y	21075219	2 to 3	G	A	G	G	G	G	A	G	G	G	G	G	A	A	A	G	#REF!
Y	21083478	9 to 11	G	C	G	G	C	G	G	G	G	C	G	G	G	G	G	G	#REF!
Y	21093777	6 to 9	T	C	T	C	C	T	T	T	T	C	C	T	T	T	T	T	#REF!
Y	21093922	3 to GBG_Mkubwa	G	A	G	G	G	G	A	G	G	G	G	G	G	G	G	G	#REF!
Y	21094138	1 to 2	T	C	T	T	T	T	C	C	T	T	T	T	C	C	C	C	#REF!
Y	21094686	11 to GGG_Guy	T	C	T	T	C	T	T	T	T	T	T	T	T	T	T	T	#REF!
Y	21098259	2 to 5	T	C	T	T	T	T	T	C	T	T	T	T	T	T	T	C	#REF!
Y	21098479	7 to 8	G	A	G	G	G	A	G	G	A	G	G	G	G	G	G	G	#REF!
Y	21098887	9 to 11	A	C	A	A	C	A	A	A	A	C	A	A	A	A	A	A	#REF!
Y	21103128	9 to 11	G	A	G	G	A	G	G	G	G	A	G	G	G	G	G	G	#REF!
Y	21113737	2 to 3	T	G	T	T	T	T	G	T	T	T	T	T	G	G	G	T	#REF!
Y	21114096	1 to 6	G	T	G	T	T	T	G	G	T	T	T	T	G	G	G	G	#REF!
Y	21116662	2 to 3	G	A	G	G	G	G	A	G	G	G	G	G	A	A	A	G	#REF!
Y	21117478	2 to 3	C	T	C	C	C	C	T	C	C	C	C	C	T	T	T	C	#REF!
Y	21138471	2 to 5	G	T	G	G	G	G	G	T	G	G	G	G	G	G	G	T	#REF!
Y	21141795	2 to 3	A	C	A	A	A	A	C	A	A	A	A	A	C	C	C	A	#REF!
Y	21142432	2 to 5	C	G	C	C	C	C	C	G	C	C	C	C	C	C	C	G	#REF!
Y	21144385	7 to GGG_Tzambo	C	T	C	C	C	C	C	C	C	C	C	T	C	C	C	C	#REF!
Y	21144423	7 to GGG_Tzambo	A	T	A	A	A	A	A	A	A	A	A	T	A	A	A	A	#REF!
Y	21145366	2 to 5	G	A	G	G	G	G	G	A	G	G	G	G	G	G	G	A	#REF!
Y	21147583	1 to 6	G	A	G	A	A	A	G	G	A	A	A	A	G	G	G	G	#REF!
Y	21149629	9 to 10	G	A	G	A	G	G	G	G	G	G	A	G	G	G	G	G	#REF!
Y	21150661	9 to 10	C	T	C	T	C	C	C	C	C	C	T	C	C	C	C	C	#REF!
Y	21157416	1 to 2	G	A	G	G	G	G	A	A	G	G	G	G	A	A	A	A	#REF!
Y	21166300	2 to 3	G	A	G	G	G	G	A	G	G	G	G	G	A	A	A	G	#REF!
Y	21174866	1 to 2	T	G	T	T	T	T	G	G	T	T	T	T	G	G	G	G	#REF!
Y	21176092	7 to GGG_Tzambo	A	G	G	G	G	G	G	G	G	G	G	A	G	G	G	G	#REF!
Y	21178370	2 to 5	T	C	T	T	T	T	T	C	T	T	T	T	T	T	T	C	#REF!
Y	21183375	1 to 2	T	C	T	T	T	T	C	C	T	T	T	T	C	C	C	C	#REF!
Y	21186271	1 to 6	G	A	G	A	A	A	G	G	A	A	A	A	G	G	G	G	#REF!
Y	21188695	7 to 8	A	G	A	A	A	G	A	A	G	A	A	A	A	A	A	A	#REF!
Y	21192985	2 to 5	C	T	C	C	C	C	C	T	C	C	C	C	C	C	C	T	#REF!
Y	21202860	6 to 7	A	C	A	A	A	C	A	A	C	A	A	C	A	A	A	A	#REF!
Y	21214086	6 to 7	A	G	A	A	A	G	A	A	G	A	A	G	A	A	A	A	#REF!
Y	21217984	9 to 10	A	G	A	G	A	A	A	A	A	A	G	A	A	A	A	A	#REF!
Y	21232566	6 to 7	T	C	T	T	T	C	T	T	C	T	T	C	T	T	T	T	#REF!
Y	21241332	9 to 10	C	T	C	T	C	C	C	C	C	C	T	C	C	C	C	C	#REF!
Y	21249964	1 to 2	A	C	A	A	A	A	C	C	A	A	A	A	C	C	C	C	#REF!
Y	21250094	1 to 2	C	A	C	C	C	C	A	A	C	C	C	C	A	A	A	A	#REF!
Y	21252493	1 to 6	C	G	C	G	G	G	C	C	G	G	G	G	C	C	C	C	#REF!
Y	21259663	1 to 2	T	C	T	T	T	T	C	C	T	T	T	T	C	C	C	C	#REF!
Y	21286084	9 to 11	G	C	G	G	C	G	G	G	G	C	G	G	G	G	G	G	#REF!
Y	21288323	7 to GGG_Tzambo	T	G	T	T	T	T	T	T	T	T	T	G	T	T	T	T	#REF!
Y	21310326	7 to 8	G	A	G	G	G	A	G	G	A	G	G	G	G	G	G	G	#REF!
Y	21311541	2 to 5	A	G	A	A	A	A	A	G	A	A	A	A	A	A	A	G	#REF!
Y	21311867	1 to 6	T	C	T	C	C	C	T	T	C	C	C	C	T	T	T	T	#REF!
Y	21312451	1 to 6	G	C	G	C	C	C	G	G	C	C	C	C	G	G	G	G	#REF!
Y	21313148	2 to 3	C	T	C	C	C	C	T	C	C	C	C	C	T	T	T	C	#REF!
Y	21316939	1 to 2	G	T	G	G	G	G	T	T	G	G	G	G	T	T	T	T	#REF!
Y	21327108	11 to GGG_Guy	C	A	C	C	A	C	C	C	C	C	C	C	C	C	C	C	#REF!
Y	21331780	7 to 8	C	T	C	C	C	T	C	C	T	C	C	C	C	C	C	C	#REF!
Y	21331799	9 to 11	C	T	C	C	T	C	C	C	C	T	C	C	C	C	C	C	#REF!
Y	21344205	7 to GGG_Tzambo	A	G	A	A	A	A	A	A	A	A	A	G	A	A	A	A	#REF!
Y	21345710	7 to 8	C	T	C	C	C	T	C	C	T	C	C	C	C	C	C	C	#REF!
Y	21353624	7 to 8	T	C	T	T	T	C	T	T	C	T	T	T	T	T	T	T	#REF!
Y	21357186	1 to 2	G	T	G	G	G	G	T	T	G	G	G	G	T	T	T	T	#REF!
Y	21357484	9 to 10	T	C	T	C	T	T	T	T	T	T	C	T	T	T	T	T	#REF!
Y	21361363	1 to 2	A	T	A	A	A	A	T	T	A	A	A	A	T	T	T	T	#REF!
Y	21364016	2 to 3	T	C	T	T	T	T	C	T	T	T	T	T	C	C	C	T	#REF!
Y	21388207	3 to 4	A	T,C	T	T	T	T	T	T	T	T	T	T	C	C	C	T	#REF!
Y	21403233	1 to 2	C	A	C	C	C	C	A	A	C	C	C	C	A	A	A	A	#REF!
Y	21416157	7 to 8	G	A	G	G	G	A	G	G	A	G	G	G	G	G	G	G	#REF!
Y	21416238	9 to 11	G	T	G	G	T	G	G	G	G	T	G	G	G	G	G	G	#REF!
Y	21423446	9 to 11	C	A	C	C	A	C	C	C	C	A	C	C	C	C	C	C	#REF!
Y	21438038	7 to 8	G	A	G	G	G	A	G	G	A	G	G	G	G	G	G	G	#REF!
Y	21439759	7 to GGG_Tzambo	A	G	A	A	A	A	A	A	A	A	A	G	A	A	A	A	#REF!
Y	21465511	7 to GGG_Tzambo	A	G	A	A	A	A	A	A	A	A	A	G	A	A	A	A	#REF!
Y	21490307	9 to 11	G	A	G	G	A	G	G	G	G	A	G	G	G	G	G	G	#REF!
Y	21492955	6 to 9	T	C	T	C	C	T	T	T	T	C	C	T	T	T	T	T	#REF!
Y	21595577	3 to 4	T	C	T	T	T	T	T	T	T	T	T	T	C	C	C	T	#REF!
Y	21619509	9 to 11	G	A	G	G	A	G	G	G	G	A	G	G	G	G	G	G	#REF!
Y	21622906	1 to 2	A	G	A	A	A	A	G	G	A	A	A	A	G	G	G	G	#REF!
Y	21627475	9 to 11	G	A	G	G	A	G	G	G	G	A	G	G	G	G	G	G	#REF!
Y	21644898	9 to 10	G	C	G	C	G	G	G	G	G	G	C	G	G	G	G	G	#REF!
Y	21657933	1 to 2	G	A	G	G	G	G	A	A	G	G	G	G	A	A	A	A	#REF!
Y	21657943	1 to 2	T	C	T	T	T	T	C	C	T	T	T	T	C	C	C	C	#REF!
Y	21659184	9 to 10	G	C	G	C	G	G	G	G	G	G	C	G	G	G	G	G	#REF!
Y	21661666	2 to 3	G	A	G	G	G	G	A	G	G	G	G	G	A	A	A	G	#REF!
Y	21662747	6 to 7	T	A	T	T	T	A	T	T	A	T	T	A	T	T	T	T	#REF!
Y	21704402	1 to 6	T	C	T	C	C	C	T	T	C	C	C	C	T	T	T	T	#REF!
Y	21712295	9 to 10	G	C	G	C	G	G	G	G	G	G	C	G	G	G	G	G	#REF!
Y	21715544	2 to 5	G	A	G	G	G	G	G	A	G	G	G	G	G	G	G	A	#REF!
Y	21728784	1 to 2	T	C	T	T	T	T	C	C	T	T	T	T	C	C	C	C	#REF!
Y	21737043	2 to 5	C	G	C	C	C	C	C	G	C	C	C	C	C	C	C	G	#REF!
Y	21739789	2 to 3	A	G	A	A	A	A	G	A	A	A	A	A	G	G	G	A	#REF!
Y	21741434	1 to 2	T	C	T	T	T	T	C	C	T	T	T	T	C	C	C	C	#REF!
Y	21752478	6 to 7	G	A	G	G	G	A	G	G	A	G	G	A	G	G	G	G	#REF!
Y	21753794	2 to 3	A	G,T	G	G	G	G	T	G	G	G	G	G	T	T	T	G	#REF!
Y	21755146	9 to 10	C	T	C	T	C	C	C	C	C	C	T	C	C	C	C	C	#REF!
Y	21759791	9 to 10	A	G	A	G	A	A	A	A	A	A	G	A	A	A	A	A	#REF!
Y	21761312	7 to 8	C	T	C	C	C	T	C	C	T	C	C	C	C	C	C	C	#REF!
Y	21763337	1 to 2	A	G	A	A	A	A	G	G	A	A	A	A	G	G	G	G	#REF!
Y	21783145	8 to GGG_Azizi	T	C	T	T	T	T	T	T	C	T	T	T	T	T	T	T	#REF!
Y	21825207	9 to 11	G	C	G	G	C	G	G	G	G	C	G	G	G	G	G	G	#REF!
Y	21826182	9 to 10	G	A	G	A	G	G	G	G	G	G	A	G	G	G	G	G	#REF!
Y	21835583	6 to 9	C	A	C	A	A	C	C	C	C	A	A	C	C	C	C	C	#REF!
Y	21839333	9 to 10	T	C	T	C	T	T	T	T	T	T	C	T	T	T	T	T	#REF!
Y	21842802	2 to 3	T	A	T	T	T	T	A	T	T	T	T	T	A	A	A	T	#REF!
Y	21865170	6 to 9	G	A	G	A	A	G	G	G	G	A	A	G	G	G	G	G	#REF!
Y	21865937	1 to 2	A	T	A	A	A	A	T	T	A	A	A	A	T	T	T	T	#REF!
Y	21871365	11 to GGG_Banjo	C	G	C	C	C	C	C	C	C	G	C	C	C	C	C	C	#REF!
Y	21872014	1 to 2	C	T	C	C	C	C	T	T	C	C	C	C	T	T	T	T	#REF!
Y	21877452	9 to 11	G	T	G	G	T	G	G	G	G	T	G	G	G	G	G	G	#REF!
Y	21878401	6 to 7	A	G	A	A	A	G	A	A	G	A	A	G	A	A	A	A	#REF!
Y	21878712	7 to GGG_Tzambo	C	G	C	C	C	C	C	C	C	C	C	G	C	C	C	C	#REF!
Y	21879160	9 to 11	T	C	T	T	C	T	T	T	T	C	T	T	T	T	T	T	#REF!
Y	21882522	9 to 11	T	C	T	T	C	T	T	T	T	C	T	T	T	T	T	T	#REF!
Y	21891764	2 to 3	C	G	C	C	C	C	G	C	C	C	C	C	G	G	G	C	#REF!
Y	21893050	1 to 2	G	C	G	G	G	G	C	C	G	G	G	G	C	C	C	C	#REF!
Y	21893274	7 to GGG_Tzambo	T	C	T	T	T	T	T	T	T	T	T	C	T	T	T	T	#REF!
Y	21893370	9 to 11	C	G	C	C	G	C	C	C	C	G	C	C	C	C	C	C	#REF!
Y	21901328	2 to 5	C	T	C	C	C	C	C	T	C	C	C	C	C	C	C	T	#REF!
Y	21903052	1 to 2	A	T	A	A	A	A	T	T	A	A	A	A	T	T	T	T	#REF!
Y	21927509	7 to 8	T	G	T	T	T	G	T	T	G	T	T	T	T	T	T	T	#REF!
Y	21930276	1 to 6	A	G	A	G	G	G	A	A	G	G	G	G	A	A	A	A	#REF!
Y	21933845	2 to 5	G	A	G	G	G	G	G	A	G	G	G	G	G	G	G	A	#REF!
Y	22020146	1 to ancestral; 1 to 2; 6 to 7; 6 to 9	A	G	A	A	A	G	G	G	G	A	A	G	G	G	G	G	#REF!
Y	22084354	7 to 8	C	G	C	C	C	G	C	C	G	C	C	C	C	C	C	C	#REF!
Y	22094384	6 to 9	C	T	T	C	C	T	T	T	T	C	C	T	T	T	T	T	#REF!
Y	22094549	9 to 11	A	T	A	A	T	A	A	A	A	T	A	A	A	A	A	A	#REF!
Y	22126693	6 to 9	T	C	T	C	C	T	T	T	T	C	C	T	T	T	T	T	#REF!
Y	22138358	2 to 3	A	G	A	A	A	A	G	A	A	A	A	A	G	G	G	A	#REF!
Y	22142313	1 to 2	G	A	G	G	G	G	A	A	G	G	G	G	A	A	A	A	#REF!
Y	22143309	2 to 5	G	T	G	G	G	G	G	T	G	G	G	G	G	G	G	T	#REF!
Y	22167842	7 to GGG_Tzambo	C	A	C	C	C	C	C	C	C	C	C	A	C	C	C	C	#REF!
Y	22174117	1 to 2	T	G	T	T	T	T	G	G	T	T	T	T	G	G	G	G	#REF!
Y	22174373	1 to 2	T	C	T	T	T	T	C	C	T	T	T	T	C	C	C	C	#REF!
Y	22188291	6 to 9	C	T	C	T	T	C	C	C	C	T	T	C	C	C	C	C	#REF!
Y	22206037	7 to 8	A	G	A	A	A	G	A	A	G	A	A	A	A	A	A	A	#REF!
Y	22215620	1 to 6	A	G	A	G	G	G	A	A	G	G	G	G	A	A	A	A	#REF!
Y	22540326	2 to 5	A	G	A	A	A	A	A	G	A	A	A	A	A	A	A	G	#REF!
Y	22576298	1 to 6	A	T	A	T	T	T	A	A	T	T	T	T	A	A	A	A	#REF!
Y	22584503	1 to 2	G	T	G	G	G	G	T	T	G	G	G	G	T	T	T	T	#REF!
Y	22584504	1 to 2	A	T	A	A	A	A	T	T	A	A	A	A	T	T	T	T	#REF!
Y	22600802	1 to 2	T	C	T	T	T	T	C	C	T	T	T	T	C	C	C	C	#REF!
Y	22604209	7 to 8	G	A	G	G	G	A	G	G	A	G	G	G	G	G	G	G	#REF!
Y	22604213	2 to 5	G	A	G	G	G	G	G	A	G	G	G	G	G	G	G	A	#REF!
Y	22607209	5 to GBG_Ntabwoba	G	A	G	G	G	G	G	G	G	G	G	G	G	G	G	A	#REF!
Y	22616770	11 to GGG_Guy	T	C	T	T	C	T	T	T	T	T	T	T	T	T	T	T	#REF!
Y	22617319	1 to 6	A	G	A	G	G	G	A	A	G	G	G	G	A	A	A	A	#REF!
Y	22632793	1 to 2	C	T	C	C	C	C	T	T	C	C	C	C	T	T	T	T	#REF!
Y	22657891	7 to 8	T	C	T	T	T	C	T	T	C	T	T	T	T	T	T	T	#REF!
Y	22669951	11 to GGG_Banjo	A	G	A	A	A	A	A	A	A	G	A	A	A	A	A	A	#REF!
Y	22669958	2 to 5	A	T	A	A	A	A	A	T	A	A	A	A	A	A	A	T	#REF!
Y	22679441	6 to 9	C	A	C	A	A	C	C	C	C	A	A	C	C	C	C	C	#REF!
Y	22681068	7 to 8	T	C	T	T	T	C	T	T	C	T	T	T	T	T	T	T	#REF!
Y	22681797	1 to 2	A	G	A	A	A	A	G	G	A	A	A	A	G	G	G	G	#REF!
Y	22682183	9 to 11	G	A	G	G	A	G	G	G	G	A	G	G	G	G	G	G	#REF!
Y	22683182	2 to 3	G	A	G	G	G	G	A	G	G	G	G	G	A	A	A	G	#REF!
Y	22686562	1 to 6	G	A	G	A	A	A	G	G	A	A	A	A	G	G	G	G	#REF!
Y	22688445	7 to 8	C	G	C	C	C	G	C	C	G	C	C	C	C	C	C	C	#REF!
Y	22696915	9 to 10	T	C	T	C	T	T	T	T	T	T	C	T	T	T	T	T	#REF!
Y	22724368	8 to GGG_Nikumba	C	T	C	C	C	T	C	C	C	C	C	C	C	C	C	C	#REF!
Y	22725119	9 to 10	C	G	C	G	C	C	C	C	C	C	G	C	C	C	C	C	#REF!
Y	22725385	11 to GGG_Guy	G	A	G	G	A	G	G	G	G	G	G	G	G	G	G	G	#REF!
Y	22732728	1 to 6	C	T	C	T	T	T	C	C	T	T	T	T	C	C	C	C	#REF!
Y	22737020	7 to 8	G	C	G	G	G	C	G	G	C	G	G	G	G	G	G	G	#REF!
Y	22737826	6 to 7	C	T	C	C	C	T	C	C	T	C	C	T	C	C	C	C	#REF!
Y	22737935	1 to 2	G	C	G	G	G	G	C	C	G	G	G	G	C	C	C	C	#REF!
Y	22739623	2 to 3	G	A	G	G	G	G	A	G	G	G	G	G	A	A	A	G	#REF!
Y	22743732	1 to 2	C	T	C	C	C	C	T	T	C	C	C	C	T	T	T	T	#REF!
Y	22749846	7 to 8	C	G	C	C	C	G	C	C	G	C	C	C	C	C	C	C	#REF!
Y	22750568	1 to 2	C	G	C	C	C	C	G	G	C	C	C	C	G	G	G	G	#REF!
Y	22751238	1 to 2	T	C	T	T	T	T	C	C	T	T	T	T	C	C	C	C	#REF!
Y	22751428	6 to 9	C	T	C	T	T	C	C	C	C	T	T	C	C	C	C	C	#REF!
Y	22772631	9 to 11	T	C	T	T	C	T	T	T	T	C	T	T	T	T	T	T	#REF!
Y	22785373	7 to 8	C	T	C	C	C	T	C	C	T	C	C	C	C	C	C	C	#REF!
Y	22786379	8 to GGG_Nikumba	A	G	G	G	G	A	G	G	G	G	G	G	G	G	G	G	#REF!
Y	22805727	9 to 11	G	T	G	G	T	G	G	G	G	T	G	G	G	G	G	G	#REF!
Y	22859791	8 to GGG_Azizi	G	T	G	G	G	G	G	G	T	G	G	G	G	G	G	G	#REF!
Y	22887424	1 to 6	T	C	T	C	C	C	T	T	C	C	C	C	T	T	T	T	#REF!
Y	22887919	9 to 10	G	C	G	C	G	G	G	G	G	G	C	G	G	G	G	G	#REF!
Y	22891187	9 to 10	T	C	T	C	T	T	T	T	T	T	C	T	T	T	T	T	#REF!
Y	22891216	2 to 3	T	A	T	T	T	T	A	T	T	T	T	T	A	A	A	T	#REF!
Y	22894076	9 to 10	G	C	G	C	G	G	G	G	G	G	C	G	G	G	G	G	#REF!
Y	22896437	1 to 6	T	C	T	C	C	C	T	T	C	C	C	C	T	T	T	T	#REF!
Y	22897893	9 to 11	G	T,C	T	T	C	T	T	T	T	C	T	T	T	T	T	T	#REF!
Y	22901130	1 to 6	G	A	G	A	A	A	G	G	A	A	A	A	G	G	G	G	#REF!
Y	22905230	6 to 9	G	T	G	T	T	G	G	G	G	T	T	G	G	G	G	G	#REF!
Y	22908982	11 to GGG_Banjo	C	T	C	C	C	C	C	C	C	T	C	C	C	C	C	C	#REF!
Y	22909173	2 to 5	C	T	C	C	C	C	C	T	C	C	C	C	C	C	C	T	#REF!
Y	22909683	1 to 2	A	G	A	A	A	A	G	G	A	A	A	A	G	G	G	G	#REF!
Y	22909827	1 to 2	T	C	C	C	C	C	T	T	C	C	C	C	T	T	T	T	#REF!
Y	22913826	11 to GGG_Banjo	C	T	C	C	C	C	C	C	C	T	C	C	C	C	C	C	#REF!
Y	22917830	1 to 2	C	A	C	C	C	C	A	A	C	C	C	C	A	A	A	A	#REF!
Y	22918355	2 to 5	C	G,A	G	G	G	G	G	A	G	G	G	G	G	G	G	A	#REF!
Y	22923916	9 to 11	C	T	C	C	T	C	C	C	C	T	C	C	C	C	C	C	#REF!
Y	22924628	1 to 2	A	G	A	A	A	A	G	G	A	A	A	A	G	G	G	G	#REF!
Y	22925840	9 to 11	T	C	T	T	C	T	T	T	T	C	T	T	T	T	T	T	#REF!
Y	22926086	9 to 10	A	G	A	G	A	A	A	A	A	A	G	A	A	A	A	A	#REF!
Y	22926379	1 to 6	G	C	G	C	C	C	G	G	C	C	C	C	G	G	G	G	#REF!
Y	22926399	3 to 4	G	A	G	G	G	G	G	G	G	G	G	G	A	A	A	G	#REF!
Y	22927030	11 to GGG_Banjo	A	G	A	A	A	A	A	A	A	G	A	A	A	A	A	A	#REF!
Y	22928292	7 to GGG_Tzambo	A	G	A	A	A	A	A	A	A	A	A	G	A	A	A	A	#REF!
Y	22937265	2 to 5	A	G	A	A	A	A	A	G	A	A	A	A	A	A	A	G	#REF!
Y	22938254	7 to 8	C	A	C	C	C	A	C	C	A	C	C	C	C	C	C	C	#REF!
Y	22940319	7 to 8	A	G	A	A	A	G	A	A	G	A	A	A	A	A	A	A	#REF!
Y	22941986	9 to 10	T	G	T	G	T	T	T	T	T	T	G	T	T	T	T	T	#REF!
Y	22942827	7 to GGG_Tzambo	C	A	C	C	C	C	C	C	C	C	C	A	C	C	C	C	#REF!
Y	22969282	2 to 3	C	T	C	C	C	C	T	C	C	C	C	C	T	T	T	C	#REF!
Y	22969494	7 to GGG_Tzambo	T	C	T	T	T	T	T	T	T	T	T	C	T	T	T	T	#REF!
Y	22971033	1 to 6	C	T	C	T	T	T	C	C	T	T	T	T	C	C	C	C	#REF!
Y	22973480	2 to 3	A	T	A	A	A	A	T	A	A	A	A	A	T	T	T	A	#REF!
Y	22975240	11 to GGG_Guy	A	G	A	A	G	A	A	A	A	A	A	A	A	A	A	A	#REF!
Y	22975625	7 to GGG_Tzambo	T	C	T	T	T	T	T	T	T	T	T	C	T	T	T	T	#REF!
Y	23022096	1 to 2	A	T	A	A	A	A	T	T	A	A	A	A	T	T	T	T	#REF!
Y	23023130	1 to ancestral; 8 to GGG_Azizi	T	C	T	C	C	C	C	C	T	C	C	C	C	C	C	C	#REF!
Y	23088515	1 to 6	G	A	G	A	A	A	G	G	A	A	A	A	G	G	G	G	#REF!
Y	23150430	1 to 6	C	T	C	T	T	T	C	C	T	T	T	T	C	C	C	C	#REF!
Y	23194166	9 to 11	G	A	G	G	A	G	G	G	G	A	G	G	G	G	G	G	#REF!
Y	23195567	1 to ancestral; 11 to GGG_Guy	T	C	T	C	T	C	C	C	C	C	C	C	C	C	C	C	#REF!
Y	23196098	1 to 2	A	G,C	G	G	G	G	C	C	G	G	G	G	C	C	C	C	#REF!
Y	23196289	2 to 3	C	G	C	C	C	C	G	C	C	C	C	C	G	G	G	C	#REF!
Y	23197161	2 to 5	T	A	T	T	T	T	T	A	T	T	T	T	T	T	T	A	#REF!
Y	23197735	7 to GGG_Tzambo	T	G	T	T	T	T	T	T	T	T	T	G	T	T	T	T	#REF!
Y	23207017	7 to 8	C	T	C	C	C	T	C	C	T	C	C	C	C	C	C	C	#REF!
Y	23207790	1 to 2	G	A	G	G	G	G	A	A	G	G	G	G	A	A	A	A	#REF!
Y	23208118	6 to 7	A	T	A	A	A	T	A	A	T	A	A	T	A	A	A	A	#REF!
Y	23248801	2 to 5	A	C	A	A	A	A	A	C	A	A	A	A	A	A	A	C	#REF!
Y	23260528	7 to 8	T	C	T	T	T	C	T	T	C	T	T	T	T	T	T	T	#REF!
Y	23268516	6 to 9	T	C	T	C	C	T	T	T	T	C	C	T	T	T	T	T	#REF!
Y	23270814	11 to GGG_Guy	T	C	T	T	C	T	T	T	T	T	T	T	T	T	T	T	#REF!
Y	23278444	6 to 7	C	T	C	C	C	T	C	C	T	C	C	T	C	C	C	C	#REF!
Y	23292757	2 to 3	A	G	A	A	A	A	G	A	A	A	A	A	G	G	G	A	#REF!
Y	23299141	9 to 11	C	T	C	C	T	C	C	C	C	T	C	C	C	C	C	C	#REF!
Y	23331871	1 to 2	C	T	C	C	C	C	T	T	C	C	C	C	T	T	T	T	#REF!
Y	23489071	1 to 6	C	T	C	T	T	T	C	C	T	T	T	T	C	C	C	C	#REF!
Y	23495036	6 to 9	T	C	T	C	C	T	T	T	T	C	C	T	T	T	T	T	#REF!
Y	23495066	6 to 9	A	T	A	T	T	A	A	A	A	T	T	A	A	A	A	A	#REF!

## Sheet: TableS12
Supplemental Table S12: MSY variant sites and genotypes in orangutans according to human genome reference (GRCh37/hg19)
CHROM	POS	Branch	REF	ALT	Ancestral	PAB_Sinjo	PAB_Duapuluh	PAB_ppy10	PAB_Buschi	PPY_Thai	PPY_Napoleon
Y	2650240	1 to 2	G	C	G	C	C	C	C	G	G
Y	2652543	1 to 5	T	G	T	T	T	T	T	G	G
Y	2653780	1 to 5	G	A	A	A	A	A	A	G	G
Y	2656401	3 to PAB_ppy10	T	G	T	T	T	G	T	T	T
Y	2656531	1 to 5	A	G	A	A	A	A	A	G	G
Y	2659302	1 to 5	G	A	G	G	G	G	G	A	A
Y	2660080	1 to 5	G	A	G	G	G	G	G	A	A
Y	2660295	1 to 5	G	T	G	G	G	G	G	T	T
Y	2661520	1 to 5	A	T	A	A	A	A	A	T	T
Y	2664384	5 to PPY_Napoleon	A	G	A	A	A	A	A	A	G
Y	2686891	1 to 2	C	T	C	T	T	T	T	C	C
Y	2692104	1 to 5	A	G	A	A	A	A	A	G	G
Y	2692197	5 to PPY_Thai	T	A	T	T	T	T	T	A	T
Y	2695149	1 to 2	A	G	A	G	G	G	G	A	A
Y	2695884	1 to 2	G	A	G	A	A	A	A	G	G
Y	2696575	1 to 2	T	G	T	G	G	G	G	T	T
Y	2709445	1 to 5	G	A	G	G	G	G	G	A	A
Y	2711830	1 to 5	A	G	A	A	A	A	A	G	G
Y	2712045	1 to 5	C	T	C	C	C	C	C	T	T
Y	2713661	1 to 5	T	C	T	T	T	T	T	C	C
Y	2714159	1 to 5	A	G	A	A	A	A	A	G	G
Y	2715344	1 to 5	C	A	C	C	C	C	C	A	A
Y	2720292	1 to 5	A	G	A	A	A	A	A	G	G
Y	2723253	2 to PAB_Duapuluh	A	G	A	A	G	A	A	A	A
Y	2723363	1 to 5	G	A	G	G	G	G	G	A	A
Y	2725197	1 to 5	T	G	T	T	T	T	T	G	G
Y	2729638	1 to 5	C	G	C	C	C	C	C	G	G
Y	2729713	1 to 2	G	A	G	A	A	A	A	G	G
Y	2729935	1 to 5	A	G,T	G	G	G	G	G	T	T
Y	2732017	1 to 5	C	G	C	C	C	C	C	G	G
Y	2734720	1 to 5	G	A	G	G	G	G	G	A	A
Y	2734760	1 to 2	G	A	G	A	A	A	A	G	G
Y	2738358	1 to 5	C	T	C	C	C	C	C	T	T
Y	2742614	1 to 5	C	T	C	C	C	C	C	T	T
Y	2749172	1 to 2	A	G	A	G	G	G	G	A	A
Y	2750129	1 to 5	G	C	G	G	G	G	G	C	C
Y	2751263	1 to 2	A	G	A	G	G	G	G	A	A
Y	2757585	1 to 2	C	T	C	T	T	T	T	C	C
Y	2767050	1 to 5	C	T	C	C	C	C	C	T	T
Y	2774416	1 to 5	C	G	C	C	C	C	C	G	G
Y	2774715	1 to ancestral; 1 to 2; 5 to PPY_Napoleon; 5 to PPY_Thai	T	A	T	A	A	A	A	T	A
Y	2776967	5 to PPY_Napoleon	A	G	A	A	A	A	A	A	G
Y	2777611	1 to 5	T	G	T	T	T	T	T	G	G
Y	2778087	1 to 2	T	C	T	C	C	C	C	T	T
Y	2800758	1 to 2	A	G	A	G	G	G	G	A	A
Y	2802421	1 to 2	A	G	A	G	G	G	G	A	A
Y	2807932	1 to 2	G	A	G	A	A	A	A	G	G
Y	2814845	1 to 2	C	T	C	T	T	T	T	C	C
Y	2815579	1 to 2	A	G	A	G	G	G	G	A	A
Y	2815855	1 to 5	A	G	A	A	A	A	A	G	G
Y	2826311	1 to 2	C	A	C	A	A	A	A	C	C
Y	2826493	1 to 5	C	T	C	C	C	C	C	T	T
Y	2826972	1 to 2	G	A	G	A	A	A	A	G	G
Y	2829661	1 to 2	G	A	G	A	A	A	A	G	G
Y	2832175	1 to 2	A	G	A	G	G	G	G	A	A
Y	2836979	1 to 2	T	C	T	C	C	C	C	T	T
Y	2840440	5 to PPY_Napoleon	A	G	A	A	A	A	A	A	G
Y	2842368	1 to 2	T	G,A	A	G	G	G	G	A	A
Y	2844630	1 to 5	A	C	A	A	A	A	A	C	C
Y	2848219	1 to 5	T	C	T	T	T	T	T	C	C
Y	2851418	1 to 5	C	G	C	C	C	C	C	G	G
Y	2851420	1 to 5	A	G	A	A	A	A	A	G	G
Y	2851743	1 to 2	T	C	T	C	C	C	C	T	T
Y	2862945	1 to 2	T	C	T	C	C	C	C	T	T
Y	2867687	1 to 2	C	T	C	T	T	T	T	C	C
Y	2870417	1 to 2	T	G	T	G	G	G	G	T	T
Y	2874487	1 to 2	A	G	A	G	G	G	G	A	A
Y	2882245	1 to 5	C	G	C	C	C	C	C	G	G
Y	2887081	1 to 5	T	C	T	T	T	T	T	C	C
Y	2889108	1 to 2	A	T	A	T	T	T	T	A	A
Y	2890531	1 to 5	T	C,G	C	C	C	C	C	G	G
Y	2891954	1 to 2	T	A	T	A	A	A	A	T	T
Y	2903496	1 to 5	A	G	A	A	A	A	A	G	G
Y	2905019	5 to PPY_Napoleon	A	T	A	A	A	A	A	A	T
Y	2908295	1 to 2	A	G	A	G	G	G	G	A	A
Y	2910685	1 to 2	G	C	G	C	C	C	C	G	G
Y	2911179	1 to 5	T	C	T	T	T	T	T	C	C
Y	6629982	1 to 2	A	C	A	C	C	C	C	A	A
Y	6636294	1 to 2	G	A	G	A	A	A	A	G	G
Y	6636764	1 to 5	C	T	C	C	C	C	C	T	T
Y	6657664	5 to PPY_Thai	T	C	T	T	T	T	T	C	T
Y	6657674	1 to 2	A	T	A	T	T	T	T	A	A
Y	6658421	5 to PPY_Napoleon	A	G	A	A	A	A	A	A	G
Y	6661219	1 to 5	C	A	C	C	C	C	C	A	A
Y	6662371	5 to PPY_Napoleon	A	G	G	G	G	G	G	G	A
Y	6662533	1 to 2	T	A	T	A	A	A	A	T	T
Y	6663136	1 to 5	C	T	C	C	C	C	C	T	T
Y	6668483	1 to 2	G	T	G	T	T	T	T	G	G
Y	6675727	1 to 2	T	C	T	C	C	C	C	T	T
Y	6696405	1 to 5	C	G	C	C	C	C	C	G	G
Y	6697604	1 to 5	G	A	G	G	G	G	G	A	A
Y	6702578	1 to 5	A	G	A	A	A	A	A	G	G
Y	6703714	1 to 5	T	A	T	T	T	T	T	A	A
Y	6704142	1 to 2	G	A	G	A	A	A	A	G	G
Y	6704647	1 to 2	C	A,G	G	A	A	A	A	G	G
Y	6705266	1 to 5	C	T	C	C	C	C	C	T	T
Y	6706086	1 to 2	G	A	G	A	A	A	A	G	G
Y	6706099	1 to 5	C	T	C	C	C	C	C	T	T
Y	6708361	1 to 5	T	C	T	T	T	T	T	C	C
Y	6715495	1 to 2	T	C	T	C	C	C	C	T	T
Y	6717458	1 to 2	T	C	T	C	C	C	C	T	T
Y	6719713	5 to PPY_Napoleon	C	T	C	C	C	C	C	C	T
Y	6734293	1 to 2	T	C	T	C	C	C	C	T	T
Y	6737513	1 to 2	T	G	G	T	T	T	T	G	G
Y	6737967	1 to 5	G	T	G	G	G	G	G	T	T
Y	6739293	1 to 2	A	G	A	G	G	G	G	A	A
Y	6739566	1 to 5	A	G	A	A	A	A	A	G	G
Y	6743334	1 to 5	A	C	A	A	A	A	A	C	C
Y	6764621	1 to 2	C	T	C	T	T	T	T	C	C
Y	6764919	3 to PAB_ppy10	T	C	T	T	T	C	T	T	T
Y	6764920	3 to PAB_ppy10	G	T	G	G	G	T	G	G	G
Y	6767436	1 to 2	G	A	G	A	A	A	A	G	G
Y	6776908	1 to 2	C	T	C	T	T	T	T	C	C
Y	6780339	1 to 5	C	G	C	C	C	C	C	G	G
Y	6780593	1 to 5	C	A,G	A	A	A	A	A	G	G
Y	6781065	1 to 2	T	G	T	G	G	G	G	T	T
Y	6781089	5 to PPY_Thai	C	T	C	C	C	C	C	T	C
Y	6782874	1 to 5	G	A	G	G	G	G	G	A	A
Y	6785803	1 to 2	C	T	C	T	T	T	T	C	C
Y	6787220	1 to 2	G	A	G	A	A	A	A	G	G
Y	6788131	1 to 2	G	A	G	A	A	A	A	G	G
Y	6789956	1 to 2	C	G,A	A	G	G	G	G	A	A
Y	6791534	5 to PPY_Napoleon	T	C	T	T	T	T	T	T	C
Y	6793130	5 to PPY_Thai	A	G	A	A	A	A	A	G	A
Y	6793505	1 to 5	G	A	G	G	G	G	G	A	A
Y	6796153	1 to 2	C	T	C	T	T	T	T	C	C
Y	6799516	1 to 5	A	T	A	A	A	A	A	T	T
Y	6802257	1 to 5	G	A	G	G	G	G	G	A	A
Y	6802630	1 to 2	C	T	C	T	T	T	T	C	C
Y	6802747	1 to 2	A	T	A	T	T	T	T	A	A
Y	6803968	1 to 5	C	T	C	C	C	C	C	T	T
Y	6804128	1 to ancestral; 1 to 2; 5 to PPY_Napoleon; 5 to PPY_Thai	A	G	A	G	G	G	G	A	G
Y	6804877	1 to 5	C	G	C	C	C	C	C	G	G
Y	6805574	1 to 5	T	C	T	T	T	T	T	C	C
Y	6806451	5 to PPY_Thai	T	C	T	T	T	T	T	C	T
Y	6808722	1 to 2	C	T	C	T	T	T	T	C	C
Y	6811492	1 to 5	A	G	A	A	A	A	A	G	G
Y	6813954	1 to 2	C	T	C	T	T	T	T	C	C
Y	6814330	1 to 5	G	A	G	G	G	G	G	A	A
Y	6817686	2 to PAB_Duapuluh	C	T	C	C	T	C	C	C	C
Y	6822969	1 to 2	T	C	T	C	C	C	C	T	T
Y	6823386	1 to 5	T	C	T	T	T	T	T	C	C
Y	6836016	1 to 5	G	A	G	G	G	G	G	A	A
Y	6836805	1 to 2	T	A	T	A	A	A	A	T	T
Y	6837531	1 to 5	T	C	T	T	T	T	T	C	C
Y	6838082	5 to PPY_Thai	T	C	T	T	T	T	T	C	T
Y	6842301	1 to 2	T	C	T	C	C	C	C	T	T
Y	6845992	5 to PPY_Thai	G	C	G	G	G	G	G	C	G
Y	6846073	5 to PPY_Thai	T	C	T	T	T	T	T	C	T
Y	6846550	1 to 2	C	T	C	T	T	T	T	C	C
Y	6851484	1 to 2	G	C	G	C	C	C	C	G	G
Y	6852620	1 to 5	A	T	A	A	A	A	A	T	T
Y	6853969	1 to 2	G	A	G	A	A	A	A	G	G
Y	6854956	1 to 5	C	T	C	C	C	C	C	T	T
Y	6857343	1 to 2	C	T	C	T	T	T	T	C	C
Y	6858041	5 to PPY_Napoleon	G	A	G	G	G	G	G	G	A
Y	6860934	1 to 5	G	A	G	G	G	G	G	A	A
Y	6863144	1 to 5	C	T	C	C	C	C	C	T	T
Y	6863198	1 to 5	A	C,G	C	C	C	C	C	G	G
Y	6863701	1 to 2	A	G	A	G	G	G	G	A	A
Y	6864508	1 to 2	G	A	G	A	A	A	A	G	G
Y	6864512	1 to 5	G	A	G	G	G	G	G	A	A
Y	6865513	1 to 5	T	C	T	T	T	T	T	C	C
Y	6866503	1 to 5	G	A	G	G	G	G	G	A	A
Y	6871928	1 to 5	G	A	G	G	G	G	G	A	A
Y	6876450	5 to PPY_Thai	G	A	G	G	G	G	G	A	G
Y	6877665	1 to 2	C	T	C	T	T	T	T	C	C
Y	6879385	5 to PPY_Thai	A	G	A	A	A	A	A	G	A
Y	6883198	1 to 5	A	G	A	A	A	A	A	G	G
Y	6883659	1 to 2	A	G	A	G	G	G	G	A	A
Y	6884138	1 to 5	C	T	C	C	C	C	C	T	T
Y	6885615	1 to 5	C	G	C	C	C	C	C	G	G
Y	6887713	1 to 5	A	G	A	A	A	A	A	G	G
Y	6887832	3 to PAB_ppy10	A	G	A	A	A	G	A	A	A
Y	6888591	1 to 5	A	G	A	A	A	A	A	G	G
Y	6890100	1 to 2	C	T	C	T	T	T	T	C	C
Y	6893335	5 to PPY_Napoleon	G	A	G	G	G	G	G	G	A
Y	6893389	1 to 5	T	C	T	T	T	T	T	C	C
Y	6893861	1 to 5	A	T	A	A	A	A	A	T	T
Y	6894567	1 to 5	G	A	G	G	G	G	G	A	A
Y	6895008	1 to 2	G	T	G	T	T	T	T	G	G
Y	6895790	5 to PPY_Napoleon	C	T	C	C	C	C	C	C	T
Y	6900725	1 to 5	G	A	G	G	G	G	G	A	A
Y	6904290	1 to 5	A	G	A	A	A	A	A	G	G
Y	6906496	1 to 2	C	A	C	A	A	A	A	C	C
Y	6908757	1 to 2	C	T,G	G	T	T	T	T	G	G
Y	6910286	1 to 5	G	A	G	G	G	G	G	A	A
Y	6912570	1 to 2	T	G	T	G	G	G	G	T	T
Y	6913185	5 to PPY_Thai	G	A	G	G	G	G	G	A	G
Y	6913311	1 to 2	C	T	C	T	T	T	T	C	C
Y	6923184	1 to 2	A	G	A	G	G	G	G	A	A
Y	6923352	1 to 5	G	C,T	C	C	C	C	C	T	T
Y	6924944	1 to 5	G	A	G	G	G	G	G	A	A
Y	6932643	1 to 2	A	G	A	G	G	G	G	A	A
Y	6935224	1 to 5	T	A	T	T	T	T	T	A	A
Y	6937109	5 to PPY_Thai	A	G	A	A	A	A	A	G	A
Y	6939856	1 to 5	T	C	T	T	T	T	T	C	C
Y	6940487	1 to 2	A	G	A	G	G	G	G	A	A
Y	6941701	1 to 5	T	C	T	T	T	T	T	C	C
Y	6941944	1 to 2	C	T	C	T	T	T	T	C	C
Y	6941947	5 to PPY_Napoleon	A	G	A	A	A	A	A	A	G
Y	6942240	1 to 5	C	A	C	C	C	C	C	A	A
Y	6943872	5 to PPY_Thai	A	G	A	A	A	A	A	G	A
Y	6944373	1 to 5	C	T	C	C	C	C	C	T	T
Y	6947019	1 to 2	C	T	C	T	T	T	T	C	C
Y	6947225	1 to 2	C	T	C	T	T	T	T	C	C
Y	6950746	3 to PAB_ppy10	C	T	C	C	C	T	C	C	C
Y	6951090	1 to 5	T	C	T	T	T	T	T	C	C
Y	6951835	1 to 2	T	C	T	C	C	C	C	T	T
Y	6954318	1 to 2	G	A	G	A	A	A	A	G	G
Y	6962438	1 to 5	A	G	A	A	A	A	A	G	G
Y	6962489	1 to 5	A	C	A	A	A	A	A	C	C
Y	6962630	1 to 5	C	T	C	C	C	C	C	T	T
Y	6964314	1 to 5	T	C	T	T	T	T	T	C	C
Y	6964791	5 to PPY_Thai	T	C	T	T	T	T	T	C	T
Y	6968746	1 to 2	T	C	T	C	C	C	C	T	T
Y	6979261	5 to PPY_Napoleon	T	G	T	T	T	T	T	T	G
Y	6980720	1 to 5	T	A	T	T	T	T	T	A	A
Y	6982885	1 to 5	C	A	C	C	C	C	C	A	A
Y	6983050	1 to 2	T	C	T	C	C	C	C	T	T
Y	6983114	5 to PPY_Thai	T	C	T	T	T	T	T	C	T
Y	6986859	1 to 2	A	G	A	G	G	G	G	A	A
Y	6988117	1 to 2	G	T	G	T	T	T	T	G	G
Y	6988286	1 to 2	C	T	C	T	T	T	T	C	C
Y	6991964	1 to 5	C	T	C	C	C	C	C	T	T
Y	6991998	5 to PPY_Napoleon	G	A,T	A	A	A	A	A	A	T
Y	6993655	1 to 2	C	G	C	G	G	G	G	C	C
Y	6995742	5 to PPY_Napoleon	T	C	T	T	T	T	T	T	C
Y	6996540	1 to 2	C	G	C	G	G	G	G	C	C
Y	7010125	1 to 5	G	A	A	A	A	A	A	G	G
Y	7020048	5 to PPY_Thai	T	G,A	G	G	G	G	G	A	G
Y	7030099	1 to 5	G	T	G	G	G	G	G	T	T
Y	7036648	1 to 5	C	T	C	C	C	C	C	T	T
Y	7129316	5 to PPY_Napoleon	T	C	T	T	T	T	T	T	C
Y	7405560	1 to ancestral; 3 to 4	G	A	G	G	A	A	G	A	A
Y	7405663	3 to PAB_ppy10	G	C	G	G	G	C	G	G	G
Y	7406268	3 to 4	C	A	C	A	C	C	A	C	C
Y	7407723	1 to 5	T	C	T	T	T	T	T	C	C
Y	7407938	1 to 5	T	C	T	T	T	T	T	C	C
Y	7408731	1 to 5	A	G	A	A	A	A	A	G	G
Y	7408795	2 to PAB_Duapuluh	T	C	T	T	C	T	T	T	T
Y	7432954	4 to PAB_Buschi	T	C	T	T	T	T	C	T	T
Y	13885603	5 to PPY_Napoleon	G	A	G	G	G	G	G	G	A
Y	13886309	4 to PAB_Buschi	C	T	C	C	C	C	T	C	C
Y	13894124	5 to PPY_Napoleon	T	C	C	C	C	C	C	C	T
Y	13996143	3 to PAB_ppy10	G	A	G	G	G	A	G	G	G
Y	14175313	4 to PAB_Buschi	A	T	A	A	A	A	T	A	A
Y	14415285	1 to 5	G	C	G	G	G	G	G	C	C
Y	14415701	1 to ancestral; 3 to PAB_ppy10	A	G	A	G	G	A	G	G	G
Y	14429630	1 to 2	T	C	T	C	C	C	C	T	T
Y	14468554	1 to 2	C	A,G	G	A	A	A	A	G	G
Y	14469528	5 to PPY_Napoleon	C	T	C	C	C	C	C	C	T
Y	14471889	1 to 5	C	T	C	C	C	C	C	T	T
Y	14472580	1 to 2	G	T	G	T	T	T	T	G	G
Y	14503981	1 to 5	G	T	G	G	G	G	G	T	T
Y	14504702	1 to 5	A	C	A	A	A	A	A	C	C
Y	14504703	1 to 5	G	A	G	G	G	G	G	A	A
Y	14504706	1 to 5	T	A	T	T	T	T	T	A	A
Y	14504709	1 to 2	G	A	G	A	A	A	A	G	G
Y	14504725	1 to 2	G	C	G	C	C	C	C	G	G
Y	14504748	1 to 5	G	A	G	G	G	G	G	A	A
Y	14507250	1 to 5	T	C	T	T	T	T	T	C	C
Y	14507387	3 to PAB_ppy10	C	T	C	C	C	T	C	C	C
Y	14507396	3 to PAB_ppy10	G	A	A	A	A	G	A	A	A
Y	14509570	1 to 5	T	C	T	T	T	T	T	C	C
Y	14509606	1 to 2; 2 to PAB_Duapuluh; 3 to 4; 3 to PAB_ppy10	C	T	C	T	T	C	T	C	C
Y	14517566	1 to 2	C	T	C	T	T	T	T	C	C
Y	14531252	1 to 5	A	G	A	A	A	A	A	G	G
Y	14535551	1 to 2	G	A	A	G	G	G	G	A	A
Y	14535598	5 to PPY_Thai	C	A	C	C	C	C	C	A	C
Y	14537040	1 to 5	A	G	A	A	A	A	A	G	G
Y	14540849	5 to PPY_Thai	G	A	G	G	G	G	G	A	G
Y	14541296	1 to 5	A	C	A	A	A	A	A	C	C
Y	14542101	5 to PPY_Napoleon	C	T	C	C	C	C	C	C	T
Y	14542310	1 to ancestral; 1 to 2; 5 to PPY_Napoleon; 5 to PPY_Thai	A	G	A	G	G	G	G	A	G
Y	14543385	5 to PPY_Napoleon	A	G	A	A	A	A	A	A	G
Y	14568027	1 to 5	G	C	G	G	G	G	G	C	C
Y	14571717	1 to 5	A	G	A	A	A	A	A	G	G
Y	14572743	1 to 5	A	G	G	G	G	G	G	A	A
Y	14577817	1 to 2	T	G	T	G	G	G	G	T	T
Y	14580229	1 to 5	C	A	C	C	C	C	C	A	A
Y	14596670	5 to PPY_Napoleon	G	C	G	G	G	G	G	G	C
Y	14597060	1 to 2	G	A	G	A	A	A	A	G	G
Y	14604003	1 to 5	C	A	C	C	C	C	C	A	A
Y	14604703	5 to PPY_Napoleon	A	C	A	A	A	A	A	A	C
Y	14605276	1 to 5	G	A	G	G	G	G	G	A	A
Y	14623963	3 to PAB_ppy10	C	T	C	C	C	T	C	C	C
Y	14627833	5 to PPY_Napoleon	C	T	C	C	C	C	C	C	T
Y	14627982	1 to 2	A	G	A	G	G	G	G	A	A
Y	14628515	1 to 5	A	G	A	A	A	A	A	G	G
Y	14629536	1 to 5	A	G	A	A	A	A	A	G	G
Y	14629561	1 to 5	T	C	T	T	T	T	T	C	C
Y	14638727	1 to 5	C	A	C	C	C	C	C	A	A
Y	14638742	1 to 2	C	T	C	T	T	T	T	C	C
Y	14640197	1 to 2	A	G	A	G	G	G	G	A	A
Y	14641765	1 to ancestral; 1 to 2; 5 to PPY_Napoleon; 5 to PPY_Thai	T	C	T	C	C	C	C	C	T
Y	14641983	1 to 2	A	C	A	C	C	C	C	A	A
Y	14642046	5 to PPY_Thai	G	A	G	G	G	G	G	A	G
Y	14643283	1 to 5	C	T	C	C	C	C	C	T	T
Y	14644738	1 to 2	A	G	A	G	G	G	G	A	A
Y	14651273	1 to 2	C	T	C	T	T	T	T	C	C
Y	14651282	1 to 2	T	G	T	G	G	G	G	T	T
Y	14660366	3 to 4	A	G	A	G	A	A	G	A	A
Y	14663784	1 to 2	A	G	A	G	G	G	G	A	A
Y	14667150	1 to 5	T	C	T	T	T	T	T	C	C
Y	14697166	1 to 5	A	G	A	A	A	A	A	G	G
Y	14698732	1 to 5	G	A	A	A	A	A	A	G	G
Y	14705596	1 to 5	C	T	C	C	C	C	C	T	T
Y	14705614	1 to 5	A	G	A	A	A	A	A	G	G
Y	14705891	1 to 2	T	C	T	C	C	C	C	T	T
Y	14722383	1 to 5	G	C	G	G	G	G	G	C	C
Y	14722387	1 to 2	C	T	C	T	T	T	T	C	C
Y	14728152	1 to 2	G	A	G	A	A	A	A	G	G
Y	14732702	1 to 2	T	G	T	G	G	G	G	T	T
Y	14773761	1 to 2	G	C	G	C	C	C	C	G	G
Y	14775201	1 to 5	C	T	C	C	C	C	C	T	T
Y	14775545	1 to 2	G	A	G	A	A	A	A	G	G
Y	14775755	1 to 5	A	G	A	A	A	A	A	G	G
Y	14776304	1 to 5	C	T	C	C	C	C	C	T	T
Y	14776772	1 to 2	C	T	C	T	T	T	T	C	C
Y	14777153	1 to 5	C	T	C	C	C	C	C	T	T
Y	14791485	5 to PPY_Thai	A	T	A	A	A	A	A	T	A
Y	14801501	1 to 2	G	A	G	A	A	A	A	G	G
Y	14801723	1 to 2	T	C	T	C	C	C	C	T	T
Y	14801765	1 to 2	C	T	C	T	T	T	T	C	C
Y	14802514	1 to 2	A	G	A	G	G	G	G	A	A
Y	14802551	5 to PPY_Napoleon	G	C	G	G	G	G	G	G	C
Y	14804228	1 to 5	A	G	A	A	A	A	A	G	G
Y	14814096	1 to 5	C	T	C	C	C	C	C	T	T
Y	14814794	5 to PPY_Thai	T	A	T	T	T	T	T	A	T
Y	14818480	1 to 5	C	T	C	C	C	C	C	T	T
Y	14819639	1 to 5	T	C	T	T	T	T	T	C	C
Y	14821060	1 to 5	A	G	A	A	A	A	A	G	G
Y	14821586	1 to 5	G	A	G	G	G	G	G	A	A
Y	14832424	1 to 2	A	G	A	G	G	G	G	A	A
Y	14832810	1 to 5	T	C	T	T	T	T	T	C	C
Y	14834036	1 to 5	C	T	C	C	C	C	C	T	T
Y	14839849	1 to 5	A	G	A	A	A	A	A	G	G
Y	14846143	1 to 2	C	T	C	T	T	T	T	C	C
Y	14847350	1 to 2	A	G	A	G	G	G	G	A	A
Y	14847427	1 to 5	T	C	T	T	T	T	T	C	C
Y	14848526	1 to 5	T	G	T	T	T	T	T	G	G
Y	14848893	1 to 5	A	G	A	A	A	A	A	G	G
Y	14849405	1 to 2	G	T	G	T	T	T	T	G	G
Y	14849742	5 to PPY_Thai	T	C	T	T	T	T	T	C	T
Y	14850373	1 to 2	G	C	G	C	C	C	C	G	G
Y	14850599	1 to 5	C	T	T	T	T	T	T	C	C
Y	14850953	1 to 5	A	G,C	G	G	G	G	G	C	C
Y	14854087	1 to 5	C	T	C	C	C	C	C	T	T
Y	14869387	1 to 5	G	C	G	G	G	G	G	C	C
Y	14869712	1 to 5	A	G	G	G	G	G	G	A	A
Y	14871154	1 to 5	G	C	G	G	G	G	G	C	C
Y	14871243	1 to 2	G	A	G	A	A	A	A	G	G
Y	14875528	5 to PPY_Thai	A	G	A	A	A	A	A	G	A
Y	14876835	1 to 2	G	T	G	T	T	T	T	G	G
Y	14882821	1 to 5	A	G	A	A	A	A	A	G	G
Y	14883142	1 to 5	A	G	A	A	A	A	A	G	G
Y	14884031	1 to 5	G	A	G	G	G	G	G	A	A
Y	14886072	5 to PPY_Napoleon	A	G	A	A	A	A	A	A	G
Y	14886507	1 to 5	G	A	G	G	G	G	G	A	A
Y	14887372	1 to 5	A	G	A	A	A	A	A	G	G
Y	14887778	1 to 2	T	C	T	C	C	C	C	T	T
Y	14900201	1 to 5	C	T	C	C	C	C	C	T	T
Y	14902294	1 to 2	T	A	T	A	A	A	A	T	T
Y	14902411	1 to 2	C	T	C	T	T	T	T	C	C
Y	14903250	1 to 5	G	C	G	G	G	G	G	C	C
Y	14904183	1 to 2	C	G	C	G	G	G	G	C	C
Y	14913308	1 to 5	A	C	A	A	A	A	A	C	C
Y	14914929	1 to 2	C	T	C	T	T	T	T	C	C
Y	14915825	1 to 5	T	C	T	T	T	T	T	C	C
Y	14918413	1 to 5	C	G	C	C	C	C	C	G	G
Y	14920434	1 to 2	A	G	A	G	G	G	G	A	A
Y	14920870	1 to 2	A	G	A	G	G	G	G	A	A
Y	14921834	1 to 5	C	A	C	C	C	C	C	A	A
Y	14923124	1 to 2	T	C	T	C	C	C	C	T	T
Y	14924279	1 to 2	A	C	A	C	C	C	C	A	A
Y	14924594	1 to 5	T	C	T	T	T	T	T	C	C
Y	14926752	1 to 5	G	A	G	G	G	G	G	A	A
Y	14927717	1 to 2	G	T	G	T	T	T	T	G	G
Y	14929441	1 to 2	A	G	A	G	G	G	G	A	A
Y	14930418	1 to 5	T	A	T	T	T	T	T	A	A
Y	14930909	1 to 2	G	A	G	A	A	A	A	G	G
Y	14938944	1 to 5	A	G	A	A	A	A	A	G	G
Y	14944361	1 to 2	C	A	C	A	A	A	A	C	C
Y	14944521	1 to 5	A	G	A	A	A	A	A	G	G
Y	14944947	5 to PPY_Napoleon	C	T	C	C	C	C	C	C	T
Y	14944971	1 to 5	A	G	A	A	A	A	A	G	G
Y	14945013	1 to 2	G	T,C	C	T	T	T	T	C	C
Y	14945596	5 to PPY_Napoleon	G	A	G	G	G	G	G	G	A
Y	14945600	1 to 2	C	G	C	G	G	G	G	C	C
Y	14945868	5 to PPY_Thai	T	C,A	C	C	C	C	C	A	C
Y	14946089	1 to 5	T	G	T	T	T	T	T	G	G
Y	14947785	5 to PPY_Thai	C	T	C	C	C	C	C	T	C
Y	14947932	1 to 2	G	A	G	A	A	A	A	G	G
Y	14951546	1 to 5	G	C	G	G	G	G	G	C	C
Y	14951547	1 to 5	G	T	G	G	G	G	G	T	T
Y	14957315	1 to 2	C	T	C	T	T	T	T	C	C
Y	14958260	5 to PPY_Thai	G	A	G	G	G	G	G	A	G
Y	14958287	1 to 2	T	C	T	C	C	C	C	T	T
Y	14959016	1 to 5	C	T	T	T	T	T	T	C	C
Y	14968219	1 to 2	A	G	A	G	G	G	G	A	A
Y	14968810	5 to PPY_Thai	A	G	A	A	A	A	A	G	A
Y	14978684	1 to 2	C	T	C	T	T	T	T	C	C
Y	14979553	1 to 5	C	G	C	C	C	C	C	G	G
Y	14982978	1 to 5	G	C	G	G	G	G	G	C	C
Y	14985393	1 to 2	T	C	T	C	C	C	C	T	T
Y	15001008	1 to 5	C	T	C	C	C	C	C	T	T
Y	15014533	1 to 2	A	C	A	C	C	C	C	A	A
Y	15015370	1 to 2	C	G	C	G	G	G	G	C	C
Y	15016784	1 to 2	A	G	G	A	A	A	A	G	G
Y	15017890	1 to 2	C	T	C	T	T	T	T	C	C
Y	15018227	1 to 5	C	T	C	C	C	C	C	T	T
Y	15018342	1 to 5	A	G	A	A	A	A	A	G	G
Y	15020509	1 to 5	A	T	A	A	A	A	A	T	T
Y	15021086	1 to 2	A	T	A	T	T	T	T	A	A
Y	15022154	2 to PAB_Duapuluh	A	G	A	A	G	A	A	A	A
Y	15022245	1 to 5	T	C	T	T	T	T	T	C	C
Y	15022259	2 to PAB_Duapuluh	T	C	T	T	C	T	T	T	T
Y	15022462	1 to 2	C	T	C	T	T	T	T	C	C
Y	15023702	1 to 5	A	G	A	A	A	A	A	G	G
Y	15024569	1 to 5	G	A	G	G	G	G	G	A	A
Y	15026230	5 to PPY_Napoleon	T	A	T	T	T	T	T	T	A
Y	15028593	1 to 2	C	G	C	G	G	G	G	C	C
Y	15029027	1 to 5	T	G	T	T	T	T	T	G	G
Y	15033609	1 to 5	C	G	C	C	C	C	C	G	G
Y	15033879	1 to 2	T	C	T	C	C	C	C	T	T
Y	15039065	1 to 5	T	C	T	T	T	T	T	C	C
Y	15040261	1 to 5	A	G	A	A	A	A	A	G	G
Y	15041716	1 to 5	A	T	A	A	A	A	A	T	T
Y	15043847	1 to 5	C	T	C	C	C	C	C	T	T
Y	15047170	1 to 5	C	G	C	C	C	C	C	G	G
Y	15047245	1 to 5	T	G	T	T	T	T	T	G	G
Y	15048650	1 to 2	C	G	C	G	G	G	G	C	C
Y	15059655	1 to 2	A	G	A	G	G	G	G	A	A
Y	15060144	1 to 5	T	A	T	T	T	T	T	A	A
Y	15061177	1 to 5	T	A,G	A	A	A	A	A	G	G
Y	15071223	1 to 2	C	G	C	G	G	G	G	C	C
Y	15075693	1 to 5	A	C	C	C	C	C	C	A	A
Y	15085529	1 to 5	T	A	T	T	T	T	T	A	A
Y	15085947	1 to 5	T	G	T	T	T	T	T	G	G
Y	15086198	1 to 2	T	C	C	T	T	T	T	C	C
Y	15086238	1 to 2	G	C	G	C	C	C	C	G	G
Y	15087547	1 to 2	T	C	T	C	C	C	C	T	T
Y	15087668	2 to PAB_Duapuluh	T	C	T	T	C	T	T	T	T
Y	15088434	1 to 2	A	T	A	T	T	T	T	A	A
Y	15096248	1 to 5	G	C	G	G	G	G	G	C	C
Y	15096826	1 to 2	C	G	C	G	G	G	G	C	C
Y	15139688	1 to 2	A	G,C	C	G	G	G	G	C	C
Y	15139989	1 to 5	A	T	A	A	A	A	A	T	T
Y	15140702	1 to 5	C	A	C	C	C	C	C	A	A
Y	15181924	1 to 2	T	C	T	C	C	C	C	T	T
Y	15303345	1 to 2	C	T	C	T	T	T	T	C	C
Y	15315184	1 to 5	G	A	G	G	G	G	G	A	A
Y	15315191	1 to 5	C	A	C	C	C	C	C	A	A
Y	15315655	1 to 2	T	C	T	C	C	C	C	T	T
Y	15316225	1 to 5	G	A	G	G	G	G	G	A	A
Y	15316453	1 to 5	C	T	T	T	T	T	T	C	C
Y	15316504	1 to 2	C	T	C	T	T	T	T	C	C
Y	15318969	1 to 5	G	A	G	G	G	G	G	A	A
Y	15327562	1 to 5	T	C	T	T	T	T	T	C	C
Y	15342134	1 to 5	G	A	G	G	G	G	G	A	A
Y	15345019	1 to 5	A	T	A	A	A	A	A	T	T
Y	15359212	1 to 5	A	T	A	A	A	A	A	T	T
Y	15363318	1 to 5	T	A	T	T	T	T	T	A	A
Y	15363386	1 to 2	C	T	C	T	T	T	T	C	C
Y	15364510	1 to 5	C	T	C	C	C	C	C	T	T
Y	15372074	1 to 2	T	C	T	C	C	C	C	T	T
Y	15372485	1 to 2	A	G	A	G	G	G	G	A	A
Y	15373058	1 to 2	A	C	A	C	C	C	C	A	A
Y	15374159	1 to 2	T	A	T	A	A	A	A	T	T
Y	15375253	1 to 2	G	A	G	A	A	A	A	G	G
Y	15381831	1 to 5	A	G	A	A	A	A	A	G	G
Y	15382012	1 to 2	C	T	C	T	T	T	T	C	C
Y	15385712	1 to 2	A	G	A	G	G	G	G	A	A
Y	15387400	1 to 2	G	T	G	T	T	T	T	G	G
Y	15411196	5 to PPY_Thai	G	A	G	G	G	G	G	A	G
Y	15411204	1 to 2	C	T	C	T	T	T	T	C	C
Y	15411564	1 to 2	C	T	T	C	C	C	C	T	T
Y	15413137	1 to 2	G	A	G	A	A	A	A	G	G
Y	15417541	1 to 5	T	C	T	T	T	T	T	C	C
Y	15421531	1 to 5	A	C	A	A	A	A	A	C	C
Y	15435331	1 to 2	T	C	T	C	C	C	C	T	T
Y	15435335	1 to 2	A	G	A	G	G	G	G	A	A
Y	15437107	1 to 2	A	G	A	G	G	G	G	A	A
Y	15437268	1 to 2	G	C	G	C	C	C	C	G	G
Y	15440152	1 to 2	T	C	T	C	C	C	C	T	T
Y	15440593	1 to 5	T	C	T	T	T	T	T	C	C
Y	15440729	1 to 5	A	C	A	A	A	A	A	C	C
Y	15441310	1 to 2	T	G	T	G	G	G	G	T	T
Y	15447372	1 to 5	T	C	T	T	T	T	T	C	C
Y	15448212	1 to 2	G	T	G	T	T	T	T	G	G
Y	15448213	1 to 5	C	A	A	A	A	A	A	C	C
Y	15460240	1 to 2	T	C	T	C	C	C	C	T	T
Y	15463461	1 to 5	C	T	T	T	T	T	T	C	C
Y	15467812	1 to 2	T	C	T	C	C	C	C	T	T
Y	15467815	5 to PPY_Thai	G	C	G	G	G	G	G	C	G
Y	15473197	1 to 2	C	T	C	T	T	T	T	C	C
Y	15473434	1 to 2	T	C	T	C	C	C	C	T	T
Y	15474690	2 to PAB_Duapuluh	C	T	C	C	T	C	C	C	C
Y	15474855	1 to 2	G	T	G	T	T	T	T	G	G
Y	15475328	5 to PPY_Napoleon	A	G	A	A	A	A	A	A	G
Y	15476737	5 to PPY_Thai	A	C	A	A	A	A	A	C	A
Y	15478016	1 to ancestral; 1 to 2; 5 to PPY_Napoleon; 5 to PPY_Thai	A	G	A	G	G	G	G	A	G
Y	15499138	1 to 2	C	T	C	T	T	T	T	C	C
Y	15499418	1 to 5	A	G,C	G	G	G	G	G	C	C
Y	15500083	1 to 5	T	C	T	T	T	T	T	C	C
Y	15502815	1 to 5	T	C	T	T	T	T	T	C	C
Y	15506199	1 to 2	G	C	G	C	C	C	C	G	G
Y	15506445	1 to 5	C	T	C	C	C	C	C	T	T
Y	15508817	5 to PPY_Thai	A	G	A	A	A	A	A	G	A
Y	15512837	3 to 4	G	A	G	A	G	G	A	G	G
Y	15513894	1 to 2	C	T	C	T	T	T	T	C	C
Y	15514851	1 to 5	T	C	T	T	T	T	T	C	C
Y	15514881	1 to 2	G	A,T	T	A	A	A	A	T	T
Y	15518214	1 to 2	T	A	T	A	A	A	A	T	T
Y	15519255	1 to 5	A	G	A	A	A	A	A	G	G
Y	15520767	1 to 5	A	T	A	A	A	A	A	T	T
Y	15522163	1 to 5	C	T	C	C	C	C	C	T	T
Y	15527007	1 to 5	G	A	G	G	G	G	G	A	A
Y	15536127	1 to 2	T	C	T	C	C	C	C	T	T
Y	15537573	1 to 2	A	C	A	C	C	C	C	A	A
Y	15567589	1 to 5	T	C	T	T	T	T	T	C	C
Y	15573086	5 to PPY_Thai	G	T	G	G	G	G	G	T	G
Y	15573322	1 to 5	T	C,A	C	C	C	C	C	A	A
Y	15573846	1 to 5	G	A	G	G	G	G	G	A	A
Y	15577316	1 to 5	T	C	T	T	T	T	T	C	C
Y	15577515	1 to 5	G	C	G	G	G	G	G	C	C
Y	15580835	1 to 5	C	G	C	C	C	C	C	G	G
Y	15587760	3 to PAB_ppy10	T	C	T	T	T	C	T	T	T
Y	15589783	1 to 5	A	C	A	A	A	A	A	C	C
Y	15591166	5 to PPY_Thai	C	G	C	C	C	C	C	G	C
Y	15594335	1 to 5	G	A	G	G	G	G	G	A	A
Y	15594806	1 to 2	A	C	A	C	C	C	C	A	A
Y	15594915	1 to 5	A	T	A	A	A	A	A	T	T
Y	15603630	1 to 2	A	G	A	G	G	G	G	A	A
Y	15604352	1 to 5	C	T	C	C	C	C	C	T	T
Y	15661184	1 to 2	C	G	C	G	G	G	G	C	C
Y	15661337	1 to 5	G	A	G	G	G	G	G	A	A
Y	15664348	1 to 5	G	T	G	G	G	G	G	T	T
Y	15680419	1 to 5	A	T	A	A	A	A	A	T	T
Y	15704410	1 to 5	T	A	T	T	T	T	T	A	A
Y	15750908	1 to 2	C	T	C	T	T	T	T	C	C
Y	15752306	1 to 5	T	A	T	T	T	T	T	A	A
Y	15752349	1 to 2	T	C	T	C	C	C	C	T	T
Y	15753152	1 to 5	T	G	T	T	T	T	T	G	G
Y	15753568	1 to 5	T	G	T	T	T	T	T	G	G
Y	15753681	1 to 2	C	A,G	G	A	A	A	A	G	G
Y	15756887	1 to 2	C	T	C	T	T	T	T	C	C
Y	15756896	1 to 5	G	A	G	G	G	G	G	A	A
Y	15757194	1 to 2	A	G	G	A	A	A	A	G	G
Y	15800950	5 to PPY_Napoleon	C	T	C	C	C	C	C	C	T
Y	15812537	5 to PPY_Thai	T	C	T	T	T	T	T	C	T
Y	15812626	1 to 5	T	C	T	T	T	T	T	C	C
Y	15813184	1 to 2	T	C	T	C	C	C	C	T	T
Y	15813308	1 to 2	A	G	A	G	G	G	G	A	A
Y	15814479	1 to 5	T	G,C	G	G	G	G	G	C	C
Y	15817644	2 to PAB_Duapuluh	G	A	G	G	A	G	G	G	G
Y	15819080	1 to 2	C	T	C	T	T	T	T	C	C
Y	15820249	1 to 2	G	C	G	C	C	C	C	G	G
Y	15821318	1 to 2	A	G	A	G	G	G	G	A	A
Y	15826385	1 to 5	C	T	C	C	C	C	C	T	T
Y	15828424	1 to 2	G	T	G	T	T	T	T	G	G
Y	15840989	1 to 5	C	A	C	C	C	C	C	A	A
Y	15842888	1 to 5	C	T	T	T	T	T	T	C	C
Y	15845688	1 to 5	A	G	A	A	A	A	A	G	G
Y	15848523	1 to 2	A	G	A	G	G	G	G	A	A
Y	15849726	1 to 2	G	A	G	A	A	A	A	G	G
Y	15849856	1 to 5	G	C	G	G	G	G	G	C	C
Y	15849863	1 to 5	G	T	G	G	G	G	G	T	T
Y	15850629	1 to 2	T	C	T	C	C	C	C	T	T
Y	15851505	1 to 5	C	T	C	C	C	C	C	T	T
Y	15866711	1 to 2	C	T	C	T	T	T	T	C	C
Y	15867651	1 to 2	T	A	T	A	A	A	A	T	T
Y	15868110	1 to 5	C	T	C	C	C	C	C	T	T
Y	15868224	1 to 2	C	T	C	T	T	T	T	C	C
Y	15871171	1 to 2	T	G	T	G	G	G	G	T	T
Y	15875745	1 to 2	C	T	C	T	T	T	T	C	C
Y	15876002	1 to 5	T	C	T	T	T	T	T	C	C
Y	15877420	1 to 2	G	A	G	A	A	A	A	G	G
Y	15877586	1 to 2	C	A,G	G	A	A	A	A	G	G
Y	15877687	3 to PAB_ppy10	C	T	C	C	C	T	C	C	C
Y	15878206	1 to 2	G	C	G	C	C	C	C	G	G
Y	15878908	1 to 2	A	G	A	G	G	G	G	A	A
Y	15895677	5 to PPY_Napoleon	A	G	A	A	A	A	A	A	G
Y	15903207	1 to 2	C	T	C	T	T	T	T	C	C
Y	15907806	5 to PPY_Napoleon	G	C	G	G	G	G	G	G	C
Y	15908637	1 to 2	G	A	G	A	A	A	A	G	G
Y	15910621	1 to 2	T	C	T	C	C	C	C	T	T
Y	15915371	1 to 5	G	A	G	G	G	G	G	A	A
Y	15916806	1 to 2	A	G	G	A	A	A	A	G	G
Y	15926536	1 to 5	A	G	A	A	A	A	A	G	G
Y	15929105	1 to 2	G	A	G	A	A	A	A	G	G
Y	15933293	1 to 2	T	G	T	G	G	G	G	T	T
Y	15933391	1 to 5	C	T,A	T	T	T	T	T	A	A
Y	15934548	1 to 2	A	G	A	G	G	G	G	A	A
Y	15934560	1 to 2	G	A	G	A	A	A	A	G	G
Y	15934572	1 to 2	A	G	A	G	G	G	G	A	A
Y	15934588	1 to 5	A	G	A	A	A	A	A	G	G
Y	15934595	1 to 2	T	C	T	C	C	C	C	T	T
Y	15937677	5 to PPY_Thai	G	C	G	G	G	G	G	C	G
Y	15938167	1 to 5	C	G	C	C	C	C	C	G	G
Y	15938622	5 to PPY_Thai	G	C	G	G	G	G	G	C	G
Y	15940717	1 to 2	T	C	T	C	C	C	C	T	T
Y	15941564	1 to 5	C	T	C	C	C	C	C	T	T
Y	15942705	1 to 2	T	C	T	C	C	C	C	T	T
Y	15948620	1 to 5	G	A	G	G	G	G	G	A	A
Y	15956286	1 to 5	T	C	T	T	T	T	T	C	C
Y	15966006	1 to 5	A	G	A	A	A	A	A	G	G
Y	15968675	3 to PAB_ppy10	C	T	C	C	C	T	C	C	C
Y	15968856	1 to 5	G	A	G	G	G	G	G	A	A
Y	15969418	5 to PPY_Thai	A	G	A	A	A	A	A	G	A
Y	15969747	1 to 5	G	A	G	G	G	G	G	A	A
Y	15971158	1 to 5	A	G	A	A	A	A	A	G	G
Y	15972681	1 to 5	G	A	G	G	G	G	G	A	A
Y	15973138	1 to 5	T	A	T	T	T	T	T	A	A
Y	15973152	5 to PPY_Thai	A	G	A	A	A	A	A	G	A
Y	15973843	1 to 5	A	G	A	A	A	A	A	G	G
Y	15973853	1 to 2	G	C,A	A	C	C	C	C	A	A
Y	15974024	2 to PAB_Duapuluh	G	A	G	G	A	G	G	G	G
Y	15974026	2 to PAB_Duapuluh	G	A	G	G	A	G	G	G	G
Y	15974721	1 to 5	C	T	C	C	C	C	C	T	T
Y	15975059	1 to 5	C	T	C	C	C	C	C	T	T
Y	15975942	1 to 5	A	G	A	A	A	A	A	G	G
Y	15976655	1 to 2	T	C	T	C	C	C	C	T	T
Y	15978242	1 to 5	C	T	C	C	C	C	C	T	T
Y	15978627	1 to 5	A	C	A	A	A	A	A	C	C
Y	15979517	1 to 2	C	A	C	A	A	A	A	C	C
Y	15980056	1 to 2	G	A	G	A	A	A	A	G	G
Y	15982950	1 to 5	C	T	C	C	C	C	C	T	T
Y	15983272	1 to 2	T	G	T	G	G	G	G	T	T
Y	15984748	1 to 2	C	T	C	T	T	T	T	C	C
Y	15986983	1 to 2	C	T	C	T	T	T	T	C	C
Y	15991510	1 to 5	G	A	G	G	G	G	G	A	A
Y	15991865	1 to 5	T	G	T	T	T	T	T	G	G
Y	15994612	1 to 2	G	C	G	C	C	C	C	G	G
Y	15997180	1 to 5	A	G	A	A	A	A	A	G	G
Y	15997234	1 to 2	A	T	A	T	T	T	T	A	A
Y	15997764	1 to 2	G	C	G	C	C	C	C	G	G
Y	15999236	1 to 2	G	T	G	T	T	T	T	G	G
Y	16033844	1 to 5	T	G,A	G	G	G	G	G	A	A
Y	16039135	5 to PPY_Thai	G	C	G	G	G	G	G	C	G
Y	16043522	1 to 5	A	C	A	A	A	A	A	C	C
Y	16063154	1 to 5	A	G	A	A	A	A	A	G	G
Y	16073582	1 to 5	G	A	G	G	G	G	G	A	A
Y	16073583	1 to 5	C	A	C	C	C	C	C	A	A
Y	16073916	1 to 5	G	A	A	A	A	A	A	G	G
Y	16172385	1 to 5	T	C	T	T	T	T	T	C	C
Y	16177308	1 to 5	A	T	A	A	A	A	A	T	T
Y	16177676	5 to PPY_Thai	G	A	G	G	G	G	G	A	G
Y	16178325	1 to 5	C	T	C	C	C	C	C	T	T
Y	16186763	1 to 5	A	G	A	A	A	A	A	G	G
Y	16187305	1 to 5	C	G	C	C	C	C	C	G	G
Y	16191200	1 to 5	G	A	G	G	G	G	G	A	A
Y	16193753	1 to 5	A	T,C	T	T	T	T	T	C	C
Y	16194318	1 to 2	C	G	C	G	G	G	G	C	C
Y	16194808	1 to 5	A	T	A	A	A	A	A	T	T
Y	16195760	1 to 2	A	G	A	G	G	G	G	A	A
Y	16199416	1 to 5	A	G	A	A	A	A	A	G	G
Y	16203084	1 to 2	T	G	T	G	G	G	G	T	T
Y	16212278	1 to 2	A	C	A	C	C	C	C	A	A
Y	16220267	1 to 2	G	A	G	A	A	A	A	G	G
Y	16220362	1 to 2	G	A	G	A	A	A	A	G	G
Y	16221358	1 to 5	A	G	A	A	A	A	A	G	G
Y	16222329	5 to PPY_Thai	C	G	C	C	C	C	C	G	C
Y	16224457	1 to 2	A	G	A	G	G	G	G	A	A
Y	16224506	1 to 2	C	A	C	A	A	A	A	C	C
Y	16224628	1 to 5	A	T	A	A	A	A	A	T	T
Y	16224846	1 to 2	T	C	T	C	C	C	C	T	T
Y	16225482	5 to PPY_Napoleon	T	G	T	T	T	T	T	T	G
Y	16227068	1 to 5	T	C	T	T	T	T	T	C	C
Y	16231309	1 to 5	T	G	T	T	T	T	T	G	G
Y	16231798	1 to 5	C	T	C	C	C	C	C	T	T
Y	16233368	1 to 2	C	A	C	A	A	A	A	C	C
Y	16236836	1 to 2	G	T	G	T	T	T	T	G	G
Y	16238676	1 to 5	C	G	C	C	C	C	C	G	G
Y	16239335	1 to 2	G	A	G	A	A	A	A	G	G
Y	16243595	1 to 2	G	T	G	T	T	T	T	G	G
Y	16243642	1 to 2	G	C	G	C	C	C	C	G	G
Y	16243742	5 to PPY_Napoleon	G	C	G	G	G	G	G	G	C
Y	16244231	5 to PPY_Napoleon	A	G	A	A	A	A	A	A	G
Y	16246941	1 to 5	A	G	A	A	A	A	A	G	G
Y	16247285	1 to 5	T	C	T	T	T	T	T	C	C
Y	16247566	1 to 2	G	A	A	G	G	G	G	A	A
Y	16247686	1 to 2	T	C	T	C	C	C	C	T	T
Y	16249976	1 to 5	G	T	G	G	G	G	G	T	T
Y	16250178	1 to 5	T	C	T	T	T	T	T	C	C
Y	16251517	1 to 5	G	A	G	G	G	G	G	A	A
Y	16251867	1 to 5	A	G	A	A	A	A	A	G	G
Y	16252067	1 to 2	A	T	A	T	T	T	T	A	A
Y	16254387	1 to 2	A	G	A	G	G	G	G	A	A
Y	16254539	5 to PPY_Napoleon	C	T	C	C	C	C	C	C	T
Y	16254663	1 to 2	G	C	G	C	C	C	C	G	G
Y	16254959	1 to 5	C	T	C	C	C	C	C	T	T
Y	16259441	5 to PPY_Napoleon	T	C	T	T	T	T	T	T	C
Y	16259476	1 to 5	T	C	T	T	T	T	T	C	C
Y	16259829	1 to 5	A	G	A	A	A	A	A	G	G
Y	16259846	1 to 5	A	G	A	A	A	A	A	G	G
Y	16261788	1 to 5	A	G	A	A	A	A	A	G	G
Y	16263471	5 to PPY_Thai	A	T	A	A	A	A	A	T	A
Y	16269922	1 to 5	A	G	A	A	A	A	A	G	G
Y	16269988	1 to 2	G	A	G	A	A	A	A	G	G
Y	16279763	1 to 2	C	T	C	T	T	T	T	C	C
Y	16280068	1 to 2	T	C	T	C	C	C	C	T	T
Y	16283286	1 to 5	C	G	C	C	C	C	C	G	G
Y	16283604	1 to 2	C	T	C	T	T	T	T	C	C
Y	16284867	1 to 2	G	C	G	C	C	C	C	G	G
Y	16285800	5 to PPY_Thai	T	C	T	T	T	T	T	C	T
Y	16286766	5 to PPY_Thai	A	G,T	G	G	G	G	G	T	G
Y	16286802	1 to 2	C	T	C	T	T	T	T	C	C
Y	16287291	1 to 2	G	C	G	C	C	C	C	G	G
Y	16313787	1 to ancestral; 4 to PAB_Buschi	G	T	G	T	T	T	G	T	T
Y	16314228	1 to 5	T	C	T	T	T	T	T	C	C
Y	16314848	1 to 5	G	A	G	G	G	G	G	A	A
Y	16316241	4 to PAB_Buschi	A	G	A	A	A	A	G	A	A
Y	16316485	1 to 5	C	A	C	C	C	C	C	A	A
Y	16316499	1 to 2; 4 to PAB_Buschi	A	G	A	G	G	G	A	A	A
Y	16472624	5 to PPY_Napoleon	G	T	G	G	G	G	G	G	T
Y	16473078	1 to 5	G	A	G	G	G	G	G	A	A
Y	16473397	1 to 2	T	G	T	G	G	G	G	T	T
Y	16473959	1 to 5	A	G	A	A	A	A	A	G	G
Y	16476068	3 to 4	G	A	G	A	G	G	A	G	G
Y	16477624	1 to 5	C	G	C	C	C	C	C	G	G
Y	16478032	1 to 2	A	G	A	G	G	G	G	A	A
Y	16478273	1 to 2	G	C,T	T	C	C	C	C	T	T
Y	16479378	1 to 5	G	A	G	G	G	G	G	A	A
Y	16479409	1 to 5	A	G	A	A	A	A	A	G	G
Y	16483330	1 to 2	A	G	A	G	G	G	G	A	A
Y	16484125	1 to 2	G	A	G	A	A	A	A	G	G
Y	16485659	5 to PPY_Thai	C	A	C	C	C	C	C	A	C
Y	16485938	1 to 2	C	T	C	T	T	T	T	C	C
Y	16494219	5 to PPY_Napoleon	T	G	T	T	T	T	T	T	G
Y	16495871	1 to 2	A	C	A	C	C	C	C	A	A
Y	16495881	1 to 5	C	T	C	C	C	C	C	T	T
Y	16505421	5 to PPY_Napoleon	C	T	C	C	C	C	C	C	T
Y	16505611	1 to 2	A	G	A	G	G	G	G	A	A
Y	16509511	1 to 2	C	T	C	T	T	T	T	C	C
Y	16509527	1 to 5	G	A	G	G	G	G	G	A	A
Y	16512693	5 to PPY_Napoleon	C	T	C	C	C	C	C	C	T
Y	16513314	3 to PAB_ppy10	A	G	A	A	A	G	A	A	A
Y	16515415	1 to 2	C	A	C	A	A	A	A	C	C
Y	16516521	1 to 5	A	G	A	A	A	A	A	G	G
Y	16521504	1 to 2	C	G	C	G	G	G	G	C	C
Y	16521809	1 to 2	T	A	T	A	A	A	A	T	T
Y	16522107	1 to 2	C	T	C	T	T	T	T	C	C
Y	16523575	1 to 5	C	A	C	C	C	C	C	A	A
Y	16524359	5 to PPY_Napoleon	G	T	G	G	G	G	G	G	T
Y	16524728	1 to 5	T	C	T	T	T	T	T	C	C
Y	16525769	1 to 5	A	G	A	A	A	A	A	G	G
Y	16527884	1 to 5	A	G	A	A	A	A	A	G	G
Y	16528737	1 to 5	C	T	C	C	C	C	C	T	T
Y	16529386	1 to 2	C	T	C	T	T	T	T	C	C
Y	16536446	1 to 2	G	T	G	T	T	T	T	G	G
Y	16537583	5 to PPY_Napoleon	C	T	C	C	C	C	C	C	T
Y	16542047	1 to 5	A	G	A	A	A	A	A	G	G
Y	16542158	1 to 2	T	G	T	G	G	G	G	T	T
Y	16545864	1 to 2	G	A	G	A	A	A	A	G	G
Y	16546074	1 to 5	T	G	T	T	T	T	T	G	G
Y	16552986	1 to 2	A	G	A	G	G	G	G	A	A
Y	16556467	1 to 2	C	A	C	A	A	A	A	C	C
Y	16556811	5 to PPY_Thai	C	A	C	C	C	C	C	A	C
Y	16556968	1 to 5	C	T	C	C	C	C	C	T	T
Y	16558728	1 to 2	G	T	G	T	T	T	T	G	G
Y	16559054	1 to 5	T	A	T	T	T	T	T	A	A
Y	16568248	1 to 5	T	A,G	A	A	A	A	A	G	G
Y	16569896	1 to 2	C	T	C	T	T	T	T	C	C
Y	16570228	1 to 2	C	T	T	C	C	C	C	T	T
Y	16571120	5 to PPY_Thai	G	A	G	G	G	G	G	A	G
Y	16571710	5 to PPY_Thai	G	A	G	G	G	G	G	A	G
Y	16572682	1 to 5	T	C	T	T	T	T	T	C	C
Y	16579234	1 to 2	G	C	G	C	C	C	C	G	G
Y	16579747	5 to PPY_Napoleon	G	A	G	G	G	G	G	G	A
Y	16580626	5 to PPY_Napoleon	T	A	T	T	T	T	T	T	A
Y	16580813	1 to 2	T	C	T	C	C	C	C	T	T
Y	16580883	5 to PPY_Napoleon	G	A	G	G	G	G	G	G	A
Y	16580903	1 to 5	C	T	C	C	C	C	C	T	T
Y	16583574	1 to 2	A	G	A	G	G	G	G	A	A
Y	16584524	1 to 2	G	C	G	C	C	C	C	G	G
Y	16584760	1 to 5	A	G	A	A	A	A	A	G	G
Y	16585600	1 to 5	C	T	C	C	C	C	C	T	T
Y	16587243	1 to 2	A	G	A	G	G	G	G	A	A
Y	16590433	1 to 5	T	C	T	T	T	T	T	C	C
Y	16593196	1 to 2	T	A	T	A	A	A	A	T	T
Y	16593215	2 to PAB_Duapuluh	A	G	A	A	G	A	A	A	A
Y	16595707	1 to 2	T	C	C	T	T	T	T	C	C
Y	16596779	3 to 4	C	T	C	T	C	C	T	C	C
Y	16597807	1 to 5	G	A	G	G	G	G	G	A	A
Y	16598063	5 to PPY_Napoleon	A	G	A	A	A	A	A	A	G
Y	16602518	1 to 2	C	T	T	C	C	C	C	T	T
Y	16602958	1 to 2	C	T	C	T	T	T	T	C	C
Y	16605164	1 to 2	T	C	C	T	T	T	T	C	C
Y	16605189	1 to 2	C	T	C	T	T	T	T	C	C
Y	16606986	1 to 5	A	C	A	A	A	A	A	C	C
Y	16607367	1 to 5	T	C	T	T	T	T	T	C	C
Y	16607605	1 to 5	G	C	G	G	G	G	G	C	C
Y	16609168	1 to 2	C	T	C	T	T	T	T	C	C
Y	16610486	1 to 5	A	G	A	A	A	A	A	G	G
Y	16612952	1 to 2	T	C	T	C	C	C	C	T	T
Y	16613217	5 to PPY_Napoleon	G	C	G	G	G	G	G	G	C
Y	16628171	5 to PPY_Napoleon	C	A	C	C	C	C	C	C	A
Y	16628306	5 to PPY_Napoleon	G	C	G	G	G	G	G	G	C
Y	16630242	1 to 5	A	G	A	A	A	A	A	G	G
Y	16630543	1 to 2	C	T	C	T	T	T	T	C	C
Y	16630566	1 to 2	A	C	A	C	C	C	C	A	A
Y	16631160	1 to 2	T	A	T	A	A	A	A	T	T
Y	16631634	2 to 3	A	G	A	G	A	G	G	A	A
Y	16634057	5 to PPY_Thai	C	G	C	C	C	C	C	G	C
Y	16635531	1 to 2	G	A	G	A	A	A	A	G	G
Y	16638018	5 to PPY_Napoleon	G	A	G	G	G	G	G	G	A
Y	16638897	1 to 5	C	T	C	C	C	C	C	T	T
Y	16639986	1 to 2	C	T	C	T	T	T	T	C	C
Y	16641384	1 to 5	G	T	G	G	G	G	G	T	T
Y	16641631	1 to 5	C	T	C	C	C	C	C	T	T
Y	16644063	1 to 5	C	T	C	C	C	C	C	T	T
Y	16646316	5 to PPY_Thai	T	C	T	T	T	T	T	C	T
Y	16649202	1 to 5	T	C	T	T	T	T	T	C	C
Y	16651510	1 to 2	C	G,A	A	G	G	G	G	A	A
Y	16655321	5 to PPY_Napoleon	T	G,A	G	G	G	G	G	G	A
Y	16659442	1 to 2	A	G	A	G	G	G	G	A	A
Y	16660484	1 to 5	A	G	A	A	A	A	A	G	G
Y	16661074	1 to 5	A	G	A	A	A	A	A	G	G
Y	16661915	1 to 5	C	T	C	C	C	C	C	T	T
Y	16662051	1 to 5	C	T	C	C	C	C	C	T	T
Y	16662220	5 to PPY_Thai	A	G	A	A	A	A	A	G	A
Y	16666118	1 to 2	G	T	G	T	T	T	T	G	G
Y	16669630	1 to 5	A	G	A	A	A	A	A	G	G
Y	16670264	1 to 5	T	C	T	T	T	T	T	C	C
Y	16671255	1 to 5	C	T	C	C	C	C	C	T	T
Y	16672165	1 to 2	C	A	C	A	A	A	A	C	C
Y	16688816	1 to 5	C	T	C	C	C	C	C	T	T
Y	16691040	1 to 2	G	C	G	C	C	C	C	G	G
Y	16695911	1 to 5	C	A	C	C	C	C	C	A	A
Y	16697293	5 to PPY_Thai	G	T	G	G	G	G	G	T	G
Y	16697433	5 to PPY_Thai	T	C	T	T	T	T	T	C	T
Y	16698480	2 to PAB_Duapuluh	C	T	C	C	T	C	C	C	C
Y	16712305	1 to 2	A	C	A	C	C	C	C	A	A
Y	16715264	5 to PPY_Thai	C	T	C	C	C	C	C	T	C
Y	16715423	1 to 2	A	G	G	A	A	A	A	G	G
Y	16715534	1 to 5	T	C	T	T	T	T	T	C	C
Y	16716255	5 to PPY_Thai	A	G	A	A	A	A	A	G	A
Y	16718061	1 to 5	G	T	G	G	G	G	G	T	T
Y	16718100	1 to 2	G	A	G	A	A	A	A	G	G
Y	16718477	5 to PPY_Thai	C	G	C	C	C	C	C	G	C
Y	16718504	1 to 2	G	A	G	A	A	A	A	G	G
Y	16718655	1 to 5	G	A	G	G	G	G	G	A	A
Y	16718659	1 to 2	T	C	T	C	C	C	C	T	T
Y	16718660	1 to 2	G	A	G	A	A	A	A	G	G
Y	16735210	1 to 5	T	C	T	T	T	T	T	C	C
Y	16735708	1 to 2	T	C	T	C	C	C	C	T	T
Y	16740927	1 to 2	C	T	C	T	T	T	T	C	C
Y	16741242	1 to 2	G	A	A	G	G	G	G	A	A
Y	16742769	1 to 5	C	T	C	C	C	C	C	T	T
Y	16744413	1 to 2	C	A	C	A	A	A	A	C	C
Y	16744627	1 to 5	G	T	G	G	G	G	G	T	T
Y	16745146	1 to 2	A	G	A	G	G	G	G	A	A
Y	16746178	4 to PAB_Sinjo	G	A	G	A	G	G	G	G	G
Y	16747829	1 to 5	G	C,T	C	C	C	C	C	T	T
Y	16747881	1 to 2	A	G	A	G	G	G	G	A	A
Y	16747950	1 to 5	T	C	T	T	T	T	T	C	C
Y	16748207	1 to 5	T	G	T	T	T	T	T	G	G
Y	16749328	1 to 5	A	G	A	A	A	A	A	G	G
Y	16751141	5 to PPY_Napoleon	C	T	C	C	C	C	C	C	T
Y	16758538	5 to PPY_Thai	G	C	G	G	G	G	G	C	G
Y	16759715	1 to 2	G	A	G	A	A	A	A	G	G
Y	16759985	2 to PAB_Duapuluh	T	C	T	T	C	T	T	T	T
Y	16761243	5 to PPY_Napoleon	G	A	G	G	G	G	G	G	A
Y	16761722	1 to 5	C	A	C	C	C	C	C	A	A
Y	16767528	3 to PAB_ppy10	A	G	A	A	A	G	A	A	A
Y	16767795	1 to 5	G	A	G	G	G	G	G	A	A
Y	16818087	1 to 5	T	C	T	T	T	T	T	C	C
Y	16820299	1 to 2	G	T	G	T	T	T	T	G	G
Y	16820413	1 to 2	G	A	G	A	A	A	A	G	G
Y	16820512	1 to 2	C	T	C	T	T	T	T	C	C
Y	16830140	1 to 5	G	C	G	G	G	G	G	C	C
Y	16832975	1 to 2	C	T	C	T	T	T	T	C	C
Y	16835305	1 to 2	C	G,A	A	G	G	G	G	A	A
Y	16836043	1 to 5	C	T	C	C	C	C	C	T	T
Y	16836100	1 to 2	G	T	G	T	T	T	T	G	G
Y	16836143	1 to 2	C	T	C	T	T	T	T	C	C
Y	16836908	1 to 5	C	T	C	C	C	C	C	T	T
Y	16838408	1 to 2	A	G	A	G	G	G	G	A	A
Y	16839434	5 to PPY_Thai	A	G	A	A	A	A	A	G	A
Y	16841068	1 to 2	A	G	A	G	G	G	G	A	A
Y	16843582	1 to 2	A	C,T	T	C	C	C	C	T	T
Y	16843817	1 to 2	C	T	C	T	T	T	T	C	C
Y	16849965	1 to 2	C	T	C	T	T	T	T	C	C
Y	16852510	1 to 2	G	A	G	A	A	A	A	G	G
Y	16852666	1 to 5	T	C	T	T	T	T	T	C	C
Y	16853168	1 to 5	A	G	A	A	A	A	A	G	G
Y	16855280	1 to 5	G	A	G	G	G	G	G	A	A
Y	16855332	1 to 5	A	G	A	A	A	A	A	G	G
Y	16857310	1 to 5	C	T	C	C	C	C	C	T	T
Y	16858925	1 to 2	C	G	C	G	G	G	G	C	C
Y	16859135	1 to 2	G	A	G	A	A	A	A	G	G
Y	16860912	3 to 4	G	T	G	T	G	G	T	G	G
Y	16861334	1 to 2	C	T	C	T	T	T	T	C	C
Y	16870039	1 to 2	T	C	T	C	C	C	C	T	T
Y	16872117	1 to 5	A	G	A	A	A	A	A	G	G
Y	16873396	1 to 2	G	A	G	A	A	A	A	G	G
Y	16877026	1 to 2	C	G	C	G	G	G	G	C	C
Y	16877137	1 to 5	G	A	G	G	G	G	G	A	A
Y	16877748	1 to 2	G	A	G	A	A	A	A	G	G
Y	16880113	1 to 2	C	T	C	T	T	T	T	C	C
Y	16880431	1 to 5	C	T	C	C	C	C	C	T	T
Y	16880983	1 to 5	C	A	C	C	C	C	C	A	A
Y	16887069	5 to PPY_Napoleon	T	C	T	T	T	T	T	T	C
Y	16887227	1 to 5	T	C	T	T	T	T	T	C	C
Y	16888810	1 to 5	T	C	T	T	T	T	T	C	C
Y	16891365	5 to PPY_Napoleon	A	G	A	A	A	A	A	A	G
Y	16891692	1 to 5	C	G	C	C	C	C	C	G	G
Y	16892235	1 to 5	A	G	A	A	A	A	A	G	G
Y	16892926	1 to 5	T	C	T	T	T	T	T	C	C
Y	16893074	1 to 5	G	C	G	G	G	G	G	C	C
Y	16893828	1 to 5	G	T	G	G	G	G	G	T	T
Y	16893934	1 to 5	T	C	T	T	T	T	T	C	C
Y	16893998	5 to PPY_Thai	T	G	T	T	T	T	T	G	T
Y	16894146	1 to 5	C	A	C	C	C	C	C	A	A
Y	16894171	1 to 2	A	G	A	G	G	G	G	A	A
Y	16895144	1 to 5	T	C	T	T	T	T	T	C	C
Y	16897339	1 to 5	A	T	A	A	A	A	A	T	T
Y	16898853	5 to PPY_Thai	C	T	C	C	C	C	C	T	C
Y	16900594	1 to 5	C	T	T	T	T	T	T	C	C
Y	16901195	1 to 5	G	A	G	G	G	G	G	A	A
Y	16902418	1 to 2	C	A	C	A	A	A	A	C	C
Y	16905943	1 to 2	A	T	A	T	T	T	T	A	A
Y	16907823	1 to 2	C	T	C	T	T	T	T	C	C
Y	16907976	5 to PPY_Napoleon	A	G	A	A	A	A	A	A	G
Y	16908955	1 to 2	C	T	C	T	T	T	T	C	C
Y	16911915	1 to 5	C	A	C	C	C	C	C	A	A
Y	16913778	1 to 5	A	T	A	A	A	A	A	T	T
Y	16913931	1 to 5	G	T	G	G	G	G	G	T	T
Y	16915748	1 to 5	T	C	T	T	T	T	T	C	C
Y	16916115	1 to 2	C	G	C	G	G	G	G	C	C
Y	16918591	1 to 5	G	A	G	G	G	G	G	A	A
Y	16920813	1 to 5	G	T	G	G	G	G	G	T	T
Y	16921044	1 to 5	C	T,G	T	T	T	T	T	G	G
Y	16921859	1 to 5	A	G	A	A	A	A	A	G	G
Y	16924596	1 to 5	C	T	C	C	C	C	C	T	T
Y	16934495	1 to 2	G	A	G	A	A	A	A	G	G
Y	16934572	1 to 5	G	A	G	G	G	G	G	A	A
Y	16934691	1 to 2	A	G	A	G	G	G	G	A	A
Y	16935135	1 to 5	A	G	A	A	A	A	A	G	G
Y	16937005	5 to PPY_Napoleon	A	G	A	A	A	A	A	A	G
Y	16937413	1 to 5	C	G	C	C	C	C	C	G	G
Y	16939179	1 to 5	T	C	T	T	T	T	T	C	C
Y	16940343	5 to PPY_Napoleon	G	A	G	G	G	G	G	G	A
Y	16940431	1 to 5	A	G	A	A	A	A	A	G	G
Y	16943607	1 to 2	C	G	C	G	G	G	G	C	C
Y	16944431	1 to 5	G	A	G	G	G	G	G	A	A
Y	16947677	1 to 5	G	A	G	G	G	G	G	A	A
Y	16950069	1 to 2	G	A	G	A	A	A	A	G	G
Y	16950803	5 to PPY_Thai	G	C	G	G	G	G	G	C	G
Y	16953874	1 to 5	C	A,G	A	A	A	A	A	G	G
Y	16955631	1 to 5	T	C	T	T	T	T	T	C	C
Y	16958122	1 to 2	C	G	C	G	G	G	G	C	C
Y	16958869	1 to 5	C	T	C	C	C	C	C	T	T
Y	16959375	5 to PPY_Napoleon	T	C	T	T	T	T	T	T	C
Y	16959418	1 to 2	A	T	A	T	T	T	T	A	A
Y	16962005	1 to 5	G	A	G	G	G	G	G	A	A
Y	16962397	1 to 2	G	A	G	A	A	A	A	G	G
Y	16963813	1 to 5	C	T	C	C	C	C	C	T	T
Y	16966139	1 to 5	C	G	C	C	C	C	C	G	G
Y	16966153	1 to 2	G	A	G	A	A	A	A	G	G
Y	16967660	1 to 2	G	C	G	C	C	C	C	G	G
Y	16968148	1 to 5	C	T	C	C	C	C	C	T	T
Y	16968248	1 to 2	C	T	C	T	T	T	T	C	C
Y	16968334	1 to 2	T	C	T	C	C	C	C	T	T
Y	16969091	1 to 2	A	C	A	C	C	C	C	A	A
Y	16969332	5 to PPY_Napoleon	G	A	G	G	G	G	G	G	A
Y	16969716	1 to 2	C	A	C	A	A	A	A	C	C
Y	16989079	1 to 2	G	A	G	A	A	A	A	G	G
Y	16989915	1 to 5	C	T	C	C	C	C	C	T	T
Y	16991782	1 to 5	A	G	A	A	A	A	A	G	G
Y	17005551	1 to 5	G	A	G	G	G	G	G	A	A
Y	17007083	1 to 5	G	T	G	G	G	G	G	T	T
Y	17012884	1 to 5	G	T	G	G	G	G	G	T	T
Y	17013599	5 to PPY_Napoleon	C	T	C	C	C	C	C	C	T
Y	17015186	1 to 5	A	G	A	A	A	A	A	G	G
Y	17015191	1 to 5	G	A	G	G	G	G	G	A	A
Y	17015815	1 to 2	T	C	T	C	C	C	C	T	T
Y	17016386	1 to 2	G	A	G	A	A	A	A	G	G
Y	17016546	1 to 5	G	A	G	G	G	G	G	A	A
Y	17018554	1 to 2	A	T	A	T	T	T	T	A	A
Y	17022272	5 to PPY_Thai	T	G	T	T	T	T	T	G	T
Y	17032614	1 to 5	T	C	T	T	T	T	T	C	C
Y	17038092	1 to 2	A	G	A	G	G	G	G	A	A
Y	17038108	1 to 2	G	A	G	A	A	A	A	G	G
Y	17043473	5 to PPY_Thai	A	T	A	A	A	A	A	T	A
Y	17045014	1 to 5	T	C	T	T	T	T	T	C	C
Y	17045119	5 to PPY_Napoleon	A	C,T	C	C	C	C	C	C	T
Y	17048669	1 to 2	A	C	A	C	C	C	C	A	A
Y	17049743	1 to 2	T	A	T	A	A	A	A	T	T
Y	17053620	1 to 2	C	T	C	T	T	T	T	C	C
Y	17053765	1 to 5	G	T	G	G	G	G	G	T	T
Y	17054227	1 to 2	T	C	T	C	C	C	C	T	T
Y	17055729	1 to 5	C	T	C	C	C	C	C	T	T
Y	17064408	1 to 5	G	C	C	C	C	C	C	G	G
Y	17073839	1 to 5	G	T	G	G	G	G	G	T	T
Y	17074119	1 to 5	C	T	C	C	C	C	C	T	T
Y	17074334	1 to 5	T	C	T	T	T	T	T	C	C
Y	17074435	1 to 5	T	C	T	T	T	T	T	C	C
Y	17076514	1 to 2	C	A	C	A	A	A	A	C	C
Y	17077953	5 to PPY_Napoleon	A	G	A	A	A	A	A	A	G
Y	17078214	1 to 5	A	G	A	A	A	A	A	G	G
Y	17078461	2 to PAB_Duapuluh	T	C	T	T	C	T	T	T	T
Y	17078889	1 to 2	C	T	C	T	T	T	T	C	C
Y	17079234	1 to 2	C	T	C	T	T	T	T	C	C
Y	17127697	1 to 2	A	T	A	T	T	T	T	A	A
Y	17128035	1 to 5	G	T	G	G	G	G	G	T	T
Y	17129909	5 to PPY_Napoleon	T	C	T	T	T	T	T	T	C
Y	17130062	1 to 5	A	G	A	A	A	A	A	G	G
Y	17132454	1 to 5	T	C	T	T	T	T	T	C	C
Y	17133321	1 to 5	T	C	T	T	T	T	T	C	C
Y	17136993	1 to 5	A	G	A	A	A	A	A	G	G
Y	17140042	1 to 2	G	T	G	T	T	T	T	G	G
Y	17141361	1 to 5	A	C	A	A	A	A	A	C	C
Y	17144831	1 to 5	T	A	T	T	T	T	T	A	A
Y	17144895	1 to 5	A	G	A	A	A	A	A	G	G
Y	17147876	1 to 5	C	T	C	C	C	C	C	T	T
Y	17150864	1 to ancestral; 1 to 2; 5 to PPY_Napoleon; 5 to PPY_Thai	A	G	A	G	G	G	G	G	A
Y	17151600	5 to PPY_Thai	T	C	T	T	T	T	T	C	T
Y	17172548	2 to PAB_Duapuluh	G	A	G	G	A	G	G	G	G
Y	17172796	1 to 2	T	G	T	G	G	G	G	T	T
Y	17173771	1 to 5	A	G	A	A	A	A	A	G	G
Y	17174225	1 to 2	A	G	A	G	G	G	G	A	A
Y	17174464	1 to 2	G	C	G	C	C	C	C	G	G
Y	17174573	1 to 5	G	C	G	G	G	G	G	C	C
Y	17177667	1 to 5	T	A	T	T	T	T	T	A	A
Y	17177668	1 to 5	A	G	A	A	A	A	A	G	G
Y	17180577	3 to 4	T	C	T	C	T	T	C	T	T
Y	17193961	1 to 2	G	C	G	C	C	C	C	G	G
Y	17195207	1 to 2	A	G	A	G	G	G	G	A	A
Y	17195243	1 to 5	A	T	A	A	A	A	A	T	T
Y	17197831	1 to 2	C	G	C	G	G	G	G	C	C
Y	17198167	1 to 2	T	A,G	G	A	A	A	A	G	G
Y	17198185	1 to 5	C	T	C	C	C	C	C	T	T
Y	17198560	1 to 5	A	G	A	A	A	A	A	G	G
Y	17205349	5 to PPY_Thai	A	T	A	A	A	A	A	T	A
Y	17206358	1 to 5	C	A	C	C	C	C	C	A	A
Y	17208335	5 to PPY_Thai	G	A	G	G	G	G	G	A	G
Y	17231967	5 to PPY_Thai	A	G	A	A	A	A	A	G	A
Y	17234099	1 to 2	A	G	A	G	G	G	G	A	A
Y	17234319	1 to 5	T	A	T	T	T	T	T	A	A
Y	17235396	1 to 2	G	A	G	A	A	A	A	G	G
Y	17237824	5 to PPY_Thai	G	C	G	G	G	G	G	C	G
Y	17238104	1 to 2	C	A	C	A	A	A	A	C	C
Y	17238221	1 to 2	G	C	G	C	C	C	C	G	G
Y	17251664	1 to 2	C	T	C	T	T	T	T	C	C
Y	17252469	1 to 2	C	A	C	A	A	A	A	C	C
Y	17253087	1 to 5	A	T	A	A	A	A	A	T	T
Y	17254069	1 to 5	A	C	A	A	A	A	A	C	C
Y	17256333	1 to 5	A	G	A	A	A	A	A	G	G
Y	17257229	1 to 5	T	C	T	T	T	T	T	C	C
Y	17290258	1 to 2	T	A	T	A	A	A	A	T	T
Y	17291248	1 to 2	A	G	A	G	G	G	G	A	A
Y	17292020	1 to 2	A	G	A	G	G	G	G	A	A
Y	17294046	1 to ancestral; 1 to 2; 5 to PPY_Napoleon; 5 to PPY_Thai	A	G	A	G	G	G	G	G	A
Y	17295684	2 to PAB_Duapuluh	A	T	A	A	T	A	A	A	A
Y	17298405	1 to 5	C	A	C	C	C	C	C	A	A
Y	17298533	1 to 2	C	G	C	G	G	G	G	C	C
Y	17301551	1 to 5	C	T	C	C	C	C	C	T	T
Y	17301553	1 to 2	C	T	C	T	T	T	T	C	C
Y	17304083	1 to 5	C	T	C	C	C	C	C	T	T
Y	17304236	1 to 5	T	C	T	T	T	T	T	C	C
Y	17304478	1 to 2	T	A	A	T	T	T	T	A	A
Y	17305114	1 to 2	G	A	G	A	A	A	A	G	G
Y	17308330	1 to 2	C	T	C	T	T	T	T	C	C
Y	17308823	1 to 2	G	A	G	A	A	A	A	G	G
Y	17320831	1 to 2	C	G	C	G	G	G	G	C	C
Y	17321880	1 to 2	G	A	G	A	A	A	A	G	G
Y	17325422	1 to 2	G	A	G	A	A	A	A	G	G
Y	17325641	1 to 2	A	G	A	G	G	G	G	A	A
Y	17327749	1 to 2	A	G	A	G	G	G	G	A	A
Y	17327820	1 to 2	C	T	C	T	T	T	T	C	C
Y	17328703	1 to 2	A	T,G	G	T	T	T	T	G	G
Y	17328728	1 to 5	A	G	G	G	G	G	G	A	A
Y	17329216	5 to PPY_Thai	A	C	A	A	A	A	A	C	A
Y	17329700	1 to 2	A	T	A	T	T	T	T	A	A
Y	17331162	1 to 5	C	T	C	C	C	C	C	T	T
Y	17332169	1 to 2	T	A	T	A	A	A	A	T	T
Y	17336623	5 to PPY_Thai	G	A	G	G	G	G	G	A	G
Y	17340263	3 to PAB_ppy10	C	G	C	C	C	G	C	C	C
Y	17340610	1 to 2	G	A	G	A	A	A	A	G	G
Y	17341618	1 to 2	T	C	T	C	C	C	C	T	T
Y	17347302	1 to 5	T	C	T	T	T	T	T	C	C
Y	17347643	1 to 5	A	T,G	T	T	T	T	T	G	G
Y	17347782	1 to 2	T	G	T	G	G	G	G	T	T
Y	17348077	1 to 5	G	A	G	G	G	G	G	A	A
Y	17348408	3 to 4	G	A	G	A	G	G	A	G	G
Y	17350635	1 to 5	A	G	A	A	A	A	A	G	G
Y	17350898	1 to 2	G	A	G	A	A	A	A	G	G
Y	17351489	2 to PAB_Duapuluh	T	C	T	T	C	T	T	T	T
Y	17351507	1 to 2	G	T	G	T	T	T	T	G	G
Y	17352487	1 to 2	T	C	T	C	C	C	C	T	T
Y	17352995	1 to 2	T	G	T	G	G	G	G	T	T
Y	17353064	1 to 5	A	C	A	A	A	A	A	C	C
Y	17353185	1 to 5	C	G	C	C	C	C	C	G	G
Y	17357473	1 to 5	C	G	C	C	C	C	C	G	G
Y	17358106	5 to PPY_Thai	C	T	C	C	C	C	C	T	C
Y	17359102	1 to 5	G	T	G	G	G	G	G	T	T
Y	17359103	1 to 5	A	T	A	A	A	A	A	T	T
Y	17361741	1 to 5	C	T	C	C	C	C	C	T	T
Y	17363258	5 to PPY_Napoleon	T	C	T	T	T	T	T	T	C
Y	17364819	1 to 2	C	T	C	T	T	T	T	C	C
Y	17364930	1 to 2	G	A	G	A	A	A	A	G	G
Y	17365360	1 to 5	T	A	T	T	T	T	T	A	A
Y	17366038	1 to 2	C	A	C	A	A	A	A	C	C
Y	17383089	5 to PPY_Napoleon	G	A	G	G	G	G	G	G	A
Y	17383105	1 to 2	C	A	C	A	A	A	A	C	C
Y	17383178	1 to 5	G	A	G	G	G	G	G	A	A
Y	17383740	1 to 5	G	A	G	G	G	G	G	A	A
Y	17384161	1 to 2	G	A	G	A	A	A	A	G	G
Y	17385109	1 to 5	C	G	C	C	C	C	C	G	G
Y	17388413	2 to PAB_Duapuluh	A	G	A	A	G	A	A	A	A
Y	17389733	1 to 2	T	C	T	C	C	C	C	T	T
Y	17393395	1 to 5	A	G	A	A	A	A	A	G	G
Y	17393682	1 to 2	C	T	T	C	C	C	C	T	T
Y	17397919	1 to 2	T	G	T	G	G	G	G	T	T
Y	17398231	1 to 2	A	T	A	T	T	T	T	A	A
Y	17398395	1 to 2	G	A	G	A	A	A	A	G	G
Y	17398663	1 to 5	G	A	G	G	G	G	G	A	A
Y	17402637	1 to 2	A	G	A	G	G	G	G	A	A
Y	17404639	1 to 5	G	C	G	G	G	G	G	C	C
Y	17404786	1 to 5	C	T	C	C	C	C	C	T	T
Y	17405140	1 to 5	G	A	G	G	G	G	G	A	A
Y	17405201	1 to 5	C	T	C	C	C	C	C	T	T
Y	17406289	5 to PPY_Thai	A	T	A	A	A	A	A	T	A
Y	17406647	1 to 5	T	A	T	T	T	T	T	A	A
Y	17408985	5 to PPY_Thai	G	A	G	G	G	G	G	A	G
Y	17410478	5 to PPY_Napoleon	T	C	T	T	T	T	T	T	C
Y	17410544	1 to 2	A	C	A	C	C	C	C	A	A
Y	17410691	1 to 5	G	A	G	G	G	G	G	A	A
Y	17411428	1 to 5	T	G	T	T	T	T	T	G	G
Y	17416116	1 to 2	C	T	C	T	T	T	T	C	C
Y	17416862	1 to 2	A	G	A	G	G	G	G	A	A
Y	17418606	1 to 5	G	A	G	G	G	G	G	A	A
Y	17420248	1 to 5	C	A	C	C	C	C	C	A	A
Y	17421089	1 to 2	G	C,T	T	C	C	C	C	T	T
Y	17421230	1 to 5	C	G	C	C	C	C	C	G	G
Y	17421283	1 to 5	T	C	T	T	T	T	T	C	C
Y	17421853	1 to 5	G	A	G	G	G	G	G	A	A
Y	17425529	1 to 5	C	T	C	C	C	C	C	T	T
Y	17435339	1 to 2	A	G	A	G	G	G	G	A	A
Y	17435465	1 to 2	T	C	T	C	C	C	C	T	T
Y	17435919	1 to 2	T	G	T	G	G	G	G	T	T
Y	17439305	1 to 2	G	C	G	C	C	C	C	G	G
Y	17439705	1 to 2	A	G	A	G	G	G	G	A	A
Y	17440064	1 to 5	A	T	A	A	A	A	A	T	T
Y	17440155	1 to 5	T	A	T	T	T	T	T	A	A
Y	17440306	1 to 5	T	C	T	T	T	T	T	C	C
Y	17440542	1 to 5	T	C	T	T	T	T	T	C	C
Y	17440755	1 to 5	G	A	A	A	A	A	A	G	G
Y	17440782	5 to PPY_Napoleon	C	G	C	C	C	C	C	C	G
Y	17442351	1 to 5	C	G	C	C	C	C	C	G	G
Y	17442607	1 to 5	G	A	G	G	G	G	G	A	A
Y	17442772	1 to 5	G	C	G	G	G	G	G	C	C
Y	17443045	1 to 2	G	A	G	A	A	A	A	G	G
Y	17445345	1 to 2	T	C	T	C	C	C	C	T	T
Y	17447379	5 to PPY_Thai	G	A	G	G	G	G	G	A	G
Y	17448038	1 to 2	C	T	C	T	T	T	T	C	C
Y	17448792	1 to 2	A	G	A	G	G	G	G	A	A
Y	17449050	1 to 2	G	A	G	A	A	A	A	G	G
Y	17456410	1 to 2	C	A	C	A	A	A	A	C	C
Y	17456629	1 to 2	C	G	C	G	G	G	G	C	C
Y	17465895	1 to 5	C	T	C	C	C	C	C	T	T
Y	17469731	1 to 5	T	C	T	T	T	T	T	C	C
Y	17470379	1 to 2	C	G	C	G	G	G	G	C	C
Y	17472587	2 to PAB_Duapuluh	C	T	C	C	T	C	C	C	C
Y	17473375	1 to 5	C	T	C	C	C	C	C	T	T
Y	17474247	1 to 5	C	T	C	C	C	C	C	T	T
Y	17475396	1 to 5	T	C	T	T	T	T	T	C	C
Y	17475591	1 to 2	A	G	A	G	G	G	G	A	A
Y	17476453	5 to PPY_Napoleon	C	T	C	C	C	C	C	C	T
Y	17477173	1 to 5	G	A	G	G	G	G	G	A	A
Y	17479580	1 to 2	C	G	C	G	G	G	G	C	C
Y	17487061	1 to 2	T	A	T	A	A	A	A	T	T
Y	17488041	5 to PPY_Napoleon	T	C	T	T	T	T	T	T	C
Y	17492382	1 to 5	C	T	C	C	C	C	C	T	T
Y	17494395	1 to 2	A	C	A	C	C	C	C	A	A
Y	17495654	1 to 5	G	A	G	G	G	G	G	A	A
Y	17497934	2 to 3	T	A,C	C	A	C	A	A	C	C
Y	17506787	1 to 5	A	G	A	A	A	A	A	G	G
Y	17508233	1 to 5	A	G,C	G	G	G	G	G	C	C
Y	17508532	1 to 2	C	T	C	T	T	T	T	C	C
Y	17508909	1 to 5	G	A	G	G	G	G	G	A	A
Y	17509462	5 to PPY_Thai	G	A	G	G	G	G	G	A	G
Y	17518105	1 to 5	C	A	C	C	C	C	C	A	A
Y	17524707	1 to 2	C	T	C	T	T	T	T	C	C
Y	17526174	1 to 5	G	A	G	G	G	G	G	A	A
Y	17528222	1 to 2	C	T	C	T	T	T	T	C	C
Y	17531777	1 to 2	A	G	A	G	G	G	G	A	A
Y	17533096	1 to 2	G	A	G	A	A	A	A	G	G
Y	17534117	1 to 2	G	A	G	A	A	A	A	G	G
Y	17551148	1 to 5	T	G	T	T	T	T	T	G	G
Y	17553299	1 to 5	A	C	A	A	A	A	A	C	C
Y	17553723	1 to 2	A	T	A	T	T	T	T	A	A
Y	17553772	1 to 2	A	G	A	G	G	G	G	A	A
Y	17553863	5 to PPY_Napoleon	G	A	G	G	G	G	G	G	A
Y	17554169	1 to ancestral; 1 to 2; 5 to PPY_Napoleon; 5 to PPY_Thai	A	G	A	G	G	G	G	A	G
Y	17554176	1 to 5	A	T	A	A	A	A	A	T	T
Y	17554762	1 to 5	C	T	C	C	C	C	C	T	T
Y	17554843	1 to 5	C	G	C	C	C	C	C	G	G
Y	17556360	1 to 2	A	G	A	G	G	G	G	A	A
Y	17556433	3 to 4	C	T	C	T	C	C	T	C	C
Y	17557364	3 to PAB_ppy10	C	T	C	C	C	T	C	C	C
Y	17563113	1 to 2	C	T	C	T	T	T	T	C	C
Y	17565947	1 to 5	G	C	G	G	G	G	G	C	C
Y	17566037	1 to 5	C	T	C	C	C	C	C	T	T
Y	17566156	1 to 5	T	G	T	T	T	T	T	G	G
Y	17680388	1 to 2	A	G	A	G	G	G	G	A	A
Y	17681245	1 to 5	A	T	A	A	A	A	A	T	T
Y	17682387	1 to 5	C	G	C	C	C	C	C	G	G
Y	17684770	1 to 5	C	T	C	C	C	C	C	T	T
Y	17690018	1 to 2	G	A	G	A	A	A	A	G	G
Y	17690442	5 to PPY_Napoleon	A	T	A	A	A	A	A	A	T
Y	17694967	1 to 2	T	C	T	C	C	C	C	T	T
Y	17695456	5 to PPY_Napoleon	G	T	G	G	G	G	G	G	T
Y	17695722	1 to 5	C	T	C	C	C	C	C	T	T
Y	17696309	1 to 5	C	A	C	C	C	C	C	A	A
Y	17704283	1 to 2	C	G	C	G	G	G	G	C	C
Y	17704465	5 to PPY_Thai	T	C	T	T	T	T	T	C	T
Y	17704927	1 to 2	G	A	G	A	A	A	A	G	G
Y	17705409	1 to 5	G	A	G	G	G	G	G	A	A
Y	17706732	1 to 2	A	T,G	G	T	T	T	T	G	G
Y	17708215	1 to 2	G	A	G	A	A	A	A	G	G
Y	17709883	1 to 2	G	A	G	A	A	A	A	G	G
Y	17710245	1 to 5	A	G	A	A	A	A	A	G	G
Y	17712388	1 to 5	G	T	G	G	G	G	G	T	T
Y	17717562	1 to 5	G	A	G	G	G	G	G	A	A
Y	17718293	1 to 5	T	G	T	T	T	T	T	G	G
Y	17719947	1 to 2	C	T	C	T	T	T	T	C	C
Y	17720451	1 to 2	A	G	A	G	G	G	G	A	A
Y	17721293	1 to 5	G	A	G	G	G	G	G	A	A
Y	17722258	1 to 5	C	A	C	C	C	C	C	A	A
Y	17722385	1 to 2	C	T	C	T	T	T	T	C	C
Y	17738437	1 to 5	T	C	T	T	T	T	T	C	C
Y	17739636	1 to 2	G	A,C	C	A	A	A	A	C	C
Y	17742201	3 to 4	A	G	A	G	A	A	G	A	A
Y	17743114	1 to 2	T	C	T	C	C	C	C	T	T
Y	17744894	1 to 5	C	G	C	C	C	C	C	G	G
Y	17745387	1 to 5	A	C	A	A	A	A	A	C	C
Y	17751267	1 to 2	C	T	C	T	T	T	T	C	C
Y	17752588	1 to 5	A	T	A	A	A	A	A	T	T
Y	17753108	1 to 5	T	A,G	A	A	A	A	A	G	G
Y	17753182	1 to 2	G	A	G	A	A	A	A	G	G
Y	17754115	1 to 2	A	G	A	G	G	G	G	A	A
Y	17754421	1 to 2	A	G	A	G	G	G	G	A	A
Y	17754749	1 to 5	T	A	T	T	T	T	T	A	A
Y	17757942	3 to 4	G	A	G	A	G	G	A	G	G
Y	17759295	1 to 2	A	G	A	G	G	G	G	A	A
Y	17761761	2 to PAB_Duapuluh	A	C	A	A	C	A	A	A	A
Y	17762891	1 to 5	T	C	T	T	T	T	T	C	C
Y	17763546	1 to 2	T	C	T	C	C	C	C	T	T
Y	17764767	1 to 2	A	G	A	G	G	G	G	A	A
Y	17764931	1 to 5	A	G	A	A	A	A	A	G	G
Y	17765031	5 to PPY_Napoleon	T	C	T	T	T	T	T	T	C
Y	17765126	1 to 5	A	G	A	A	A	A	A	G	G
Y	17766550	5 to PPY_Thai	T	C	T	T	T	T	T	C	T
Y	17767890	1 to 2	G	C	G	C	C	C	C	G	G
Y	17769261	1 to 5	G	C	G	G	G	G	G	C	C
Y	17770717	1 to 5	G	A	G	G	G	G	G	A	A
Y	17770933	1 to 2	G	A	G	A	A	A	A	G	G
Y	17770956	1 to 5	G	A	G	G	G	G	G	A	A
Y	17771080	1 to 2	G	T	G	T	T	T	T	G	G
Y	17771805	1 to 2	T	C	T	C	C	C	C	T	T
Y	17772368	1 to 2	C	G,A	A	G	G	G	G	A	A
Y	17772407	5 to PPY_Napoleon	C	T	C	C	C	C	C	C	T
Y	17774520	1 to 2	T	C	T	C	C	C	C	T	T
Y	17774743	1 to 2	G	A	G	A	A	A	A	G	G
Y	17780057	1 to 5	G	A	G	G	G	G	G	A	A
Y	17780247	1 to 5	G	T	G	G	G	G	G	T	T
Y	17780374	1 to 5	C	G	C	C	C	C	C	G	G
Y	17780683	1 to 5	T	G	T	T	T	T	T	G	G
Y	17780693	1 to 2	C	T	C	T	T	T	T	C	C
Y	17780719	3 to 4	A	T	A	T	A	A	T	A	A
Y	17782137	1 to 5	G	T	G	G	G	G	G	T	T
Y	17789908	1 to 2	G	A	G	A	A	A	A	G	G
Y	17790497	5 to PPY_Thai	G	C	G	G	G	G	G	C	G
Y	17790813	1 to 2	T	G	T	G	G	G	G	T	T
Y	17793725	1 to 5	C	A	C	C	C	C	C	A	A
Y	17794701	1 to 5	C	T	C	C	C	C	C	T	T
Y	17799012	1 to 5	C	T	C	C	C	C	C	T	T
Y	17800047	1 to 5	A	G	A	A	A	A	A	G	G
Y	17801337	1 to 2	G	A	G	A	A	A	A	G	G
Y	17801998	1 to 5	T	C	T	T	T	T	T	C	C
Y	17802830	1 to 5	T	C	T	T	T	T	T	C	C
Y	17802899	1 to 2	C	A	C	A	A	A	A	C	C
Y	17803002	1 to 2	T	G	T	G	G	G	G	T	T
Y	17804781	2 to PAB_Duapuluh	G	C	G	G	C	G	G	G	G
Y	17805336	1 to 2	C	T	C	T	T	T	T	C	C
Y	17805836	5 to PPY_Thai	G	A	G	G	G	G	G	A	G
Y	17806142	1 to 5	A	G	A	A	A	A	A	G	G
Y	17811922	1 to 5	T	C	T	T	T	T	T	C	C
Y	17811957	1 to 2	T	C	T	C	C	C	C	T	T
Y	17821098	2 to PAB_Duapuluh	C	T	C	C	T	C	C	C	C
Y	17831731	1 to 5	A	G	A	A	A	A	A	G	G
Y	17831918	5 to PPY_Thai	G	A	G	G	G	G	G	A	G
Y	17832084	1 to 2	A	G	A	G	G	G	G	A	A
Y	17832228	1 to 5	G	A	G	G	G	G	G	A	A
Y	17832372	5 to PPY_Thai	G	A	G	G	G	G	G	A	G
Y	17833913	1 to 5	A	G	A	A	A	A	A	G	G
Y	17844076	1 to 2	C	T	C	T	T	T	T	C	C
Y	17844478	1 to 5	G	T	G	G	G	G	G	T	T
Y	17847213	1 to 5	C	A	C	C	C	C	C	A	A
Y	17848243	1 to 5	C	A	C	C	C	C	C	A	A
Y	17850941	1 to 2	C	T	C	T	T	T	T	C	C
Y	17851237	5 to PPY_Thai	C	T	C	C	C	C	C	T	C
Y	17861450	5 to PPY_Thai	T	C	T	T	T	T	T	C	T
Y	17861600	1 to 5	A	C	A	A	A	A	A	C	C
Y	17861748	1 to 5	G	A	G	G	G	G	G	A	A
Y	17862306	1 to 2	A	G	A	G	G	G	G	A	A
Y	17866583	1 to 5	T	A	T	T	T	T	T	A	A
Y	17868281	1 to 2	A	G	A	G	G	G	G	A	A
Y	17868298	1 to 5	T	G	T	T	T	T	T	G	G
Y	17868849	1 to 2	A	G	A	G	G	G	G	A	A
Y	17869430	1 to 2	G	T	G	T	T	T	T	G	G
Y	17869611	1 to 5	G	C	G	G	G	G	G	C	C
Y	17870267	1 to 2	G	A	G	A	A	A	A	G	G
Y	17870757	1 to 2	T	C	T	C	C	C	C	T	T
Y	17872038	1 to 5	G	A	G	G	G	G	G	A	A
Y	17872151	1 to 5	G	A	G	G	G	G	G	A	A
Y	17874598	1 to 2	G	A	G	A	A	A	A	G	G
Y	17874684	1 to 2	A	G	A	G	G	G	G	A	A
Y	17875070	5 to PPY_Napoleon	G	C	G	G	G	G	G	G	C
Y	17875323	1 to 2	T	A	T	A	A	A	A	T	T
Y	17878011	1 to 2	T	C	T	C	C	C	C	T	T
Y	17881441	1 to 2	C	T	C	T	T	T	T	C	C
Y	17891934	1 to 2	T	C	T	C	C	C	C	T	T
Y	17893089	5 to PPY_Thai	A	T	A	A	A	A	A	T	A
Y	17893307	1 to 5	G	A	G	G	G	G	G	A	A
Y	17895919	1 to 5	C	T	C	C	C	C	C	T	T
Y	17896730	1 to 5	G	A	G	G	G	G	G	A	A
Y	17905355	1 to 2	A	C	A	C	C	C	C	A	A
Y	17905739	1 to 5	G	A	G	G	G	G	G	A	A
Y	17906872	1 to 5	C	T	C	C	C	C	C	T	T
Y	17909111	1 to 2	A	G	A	G	G	G	G	A	A
Y	17910348	5 to PPY_Napoleon	A	G	A	A	A	A	A	A	G
Y	17911230	5 to PPY_Napoleon	G	A	G	G	G	G	G	G	A
Y	17915110	1 to 2	A	G	A	G	G	G	G	A	A
Y	17915382	1 to 2	T	G,C	C	G	G	G	G	C	C
Y	17915594	1 to 2	G	A	G	A	A	A	A	G	G
Y	17919429	1 to 5	T	A	T	T	T	T	T	A	A
Y	17919808	2 to 3	G	T	G	T	G	T	T	G	G
Y	17920023	1 to 5	A	G	A	A	A	A	A	G	G
Y	17922362	5 to PPY_Napoleon	T	G	T	T	T	T	T	T	G
Y	17925153	1 to 2	C	T	C	T	T	T	T	C	C
Y	17926287	1 to 5	C	G	C	C	C	C	C	G	G
Y	17926642	1 to 2	T	C	T	C	C	C	C	T	T
Y	17926898	1 to 2	T	C	T	C	C	C	C	T	T
Y	17927139	1 to 2	T	C	T	C	C	C	C	T	T
Y	17936313	1 to 2	A	G	A	G	G	G	G	A	A
Y	17936639	1 to 5	C	A	C	C	C	C	C	A	A
Y	17936877	1 to 2	G	T	G	T	T	T	T	G	G
Y	17938674	1 to 2	G	A	G	A	A	A	A	G	G
Y	17940927	1 to 5	A	G	A	A	A	A	A	G	G
Y	17942476	1 to 2	C	T	C	T	T	T	T	C	C
Y	17942990	1 to 5	T	C	T	T	T	T	T	C	C
Y	17943698	1 to 2	G	T	G	T	T	T	T	G	G
Y	17945156	1 to 5	C	T	C	C	C	C	C	T	T
Y	17948009	1 to 2	C	T	C	T	T	T	T	C	C
Y	17948215	1 to 2	G	A	G	A	A	A	A	G	G
Y	17948248	5 to PPY_Napoleon	C	T	C	C	C	C	C	C	T
Y	17948519	1 to 2	T	G	T	G	G	G	G	T	T
Y	17948914	1 to 5	A	G	A	A	A	A	A	G	G
Y	17950024	1 to 5	C	T	C	C	C	C	C	T	T
Y	17952210	1 to 5	C	A	C	C	C	C	C	A	A
Y	17956546	1 to 2	C	G	C	G	G	G	G	C	C
Y	17956814	1 to 5	A	T	A	A	A	A	A	T	T
Y	17956870	1 to 2	C	G	C	G	G	G	G	C	C
Y	17960926	5 to PPY_Napoleon	T	A	T	T	T	T	T	T	A
Y	17961027	1 to 2	C	T	C	T	T	T	T	C	C
Y	17961143	1 to 5	G	C	G	G	G	G	G	C	C
Y	17971376	1 to 2	C	T	C	T	T	T	T	C	C
Y	17971405	1 to 2	C	T	C	T	T	T	T	C	C
Y	17975757	1 to 2	G	A	G	A	A	A	A	G	G
Y	17976215	1 to 2	A	G	A	G	G	G	G	A	A
Y	17980877	1 to 2	C	T	C	T	T	T	T	C	C
Y	17981435	1 to 2	C	T	C	T	T	T	T	C	C
Y	17983400	1 to 2	A	C	A	C	C	C	C	A	A
Y	17985737	1 to 5	T	C	T	T	T	T	T	C	C
Y	17985817	1 to 2	A	C	A	C	C	C	C	A	A
Y	18018591	1 to 2	G	C	G	C	C	C	C	G	G
Y	18018672	1 to 5	G	C	G	G	G	G	G	C	C
Y	18027240	1 to 5	T	G	T	T	T	T	T	G	G
Y	18027893	1 to 5	G	A	G	G	G	G	G	A	A
Y	18028329	1 to 2	T	C	T	C	C	C	C	T	T
Y	18028416	1 to 5	C	T	C	C	C	C	C	T	T
Y	18028417	1 to 2	G	A	G	A	A	A	A	G	G
Y	18030496	1 to 5	T	C	T	T	T	T	T	C	C
Y	18030557	5 to PPY_Thai	C	T	C	C	C	C	C	T	C
Y	18032309	1 to 2	C	T	T	C	C	C	C	T	T
Y	18032513	1 to 2	G	A	G	A	A	A	A	G	G
Y	18034306	5 to PPY_Napoleon	T	C	T	T	T	T	T	T	C
Y	18034538	1 to 2	C	A	C	A	A	A	A	C	C
Y	18034792	1 to 2	C	T	C	T	T	T	T	C	C
Y	18035126	1 to 5	C	A,G	A	A	A	A	A	G	G
Y	18039685	1 to 5	A	C	A	A	A	A	A	C	C
Y	18039996	1 to 2	G	T	G	T	T	T	T	G	G
Y	18040086	1 to 5	G	A	G	G	G	G	G	A	A
Y	18040215	5 to PPY_Napoleon	C	A,G	A	A	A	A	A	A	G
Y	18043570	1 to 5	G	A	G	G	G	G	G	A	A
Y	18046012	1 to 2	A	T	A	T	T	T	T	A	A
Y	18046132	1 to 5	T	C	T	T	T	T	T	C	C
Y	18046466	1 to 5	C	T	C	C	C	C	C	T	T
Y	18046531	1 to 2	A	T	A	T	T	T	T	A	A
Y	18047628	1 to 2	C	G	C	G	G	G	G	C	C
Y	18047642	1 to 2	G	C	G	C	C	C	C	G	G
Y	18048231	5 to PPY_Thai	T	C	T	T	T	T	T	C	T
Y	18049262	1 to 5	C	T	C	C	C	C	C	T	T
Y	18049382	1 to 2	A	G	A	G	G	G	G	A	A
Y	18051126	5 to PPY_Napoleon	C	A	C	C	C	C	C	C	A
Y	18051252	1 to 2	T	A	T	A	A	A	A	T	T
Y	18051324	1 to 5	G	T	G	G	G	G	G	T	T
Y	18051493	1 to 5	C	T	C	C	C	C	C	T	T
Y	18051871	1 to 5	G	A	G	G	G	G	G	A	A
Y	18051872	1 to 5	C	A	C	C	C	C	C	A	A
Y	18060930	2 to PAB_Duapuluh	A	T	A	A	T	A	A	A	A
Y	18064963	1 to 2	C	T	C	T	T	T	T	C	C
Y	18069417	1 to 5	T	C	T	T	T	T	T	C	C
Y	18070606	1 to 2	T	C	T	C	C	C	C	T	T
Y	18071055	1 to 5	T	G	T	T	T	T	T	G	G
Y	18072401	1 to 5	A	G	A	A	A	A	A	G	G
Y	18072915	1 to 5	G	A	G	G	G	G	G	A	A
Y	18073669	1 to 2	C	T	C	T	T	T	T	C	C
Y	18076750	1 to 5	C	T	C	C	C	C	C	T	T
Y	18077110	5 to PPY_Thai	T	A	T	T	T	T	T	A	T
Y	18077128	1 to 5	G	T	G	G	G	G	G	T	T
Y	18077356	1 to 5	G	A	G	G	G	G	G	A	A
Y	18082534	1 to 5	A	G	A	A	A	A	A	G	G
Y	18083710	5 to PPY_Thai	C	T	C	C	C	C	C	T	C
Y	18083908	1 to 5	C	T	C	C	C	C	C	T	T
Y	18083978	1 to 2	G	A	G	A	A	A	A	G	G
Y	18084402	5 to PPY_Thai	G	T	G	G	G	G	G	T	G
Y	18084803	1 to 5	G	A	G	G	G	G	G	A	A
Y	18096885	1 to 2	A	G,C	C	G	G	G	G	C	C
Y	18098554	1 to 2	G	A	G	A	A	A	A	G	G
Y	18100439	1 to 5	A	G	A	A	A	A	A	G	G
Y	18100576	1 to 2	C	T	C	T	T	T	T	C	C
Y	18102026	1 to 5	T	C	T	T	T	T	T	C	C
Y	18104797	1 to 2	G	A	G	A	A	A	A	G	G
Y	18107037	1 to 2	C	A	C	A	A	A	A	C	C
Y	18107858	1 to 5	T	G	T	T	T	T	T	G	G
Y	18109251	1 to 5	G	A	G	G	G	G	G	A	A
Y	18110824	1 to 5	T	C	T	T	T	T	T	C	C
Y	18111438	1 to 5	A	G,T	G	G	G	G	G	T	T
Y	18112060	1 to 2	T	C	T	C	C	C	C	T	T
Y	18112178	1 to 5	G	C,A	C	C	C	C	C	A	A
Y	18112878	1 to 2	T	A	T	A	A	A	A	T	T
Y	18113115	5 to PPY_Thai	C	T	C	C	C	C	C	T	C
Y	18117585	5 to PPY_Thai	T	G	T	T	T	T	T	G	T
Y	18118245	1 to 5	C	T	C	C	C	C	C	T	T
Y	18119145	5 to PPY_Thai	G	A	G	G	G	G	G	A	G
Y	18122142	1 to 2	C	T	C	T	T	T	T	C	C
Y	18122506	1 to 5	G	C	G	G	G	G	G	C	C
Y	18123454	1 to 5	G	A	G	G	G	G	G	A	A
Y	18127082	1 to 5	T	C	T	T	T	T	T	C	C
Y	18127280	1 to 2	C	G	C	G	G	G	G	C	C
Y	18128623	1 to 5	G	A	G	G	G	G	G	A	A
Y	18128822	1 to 2	G	A	G	A	A	A	A	G	G
Y	18144073	1 to 2	C	T	C	T	T	T	T	C	C
Y	18144103	1 to 5	G	A	G	G	G	G	G	A	A
Y	18163234	1 to 5	C	G	C	C	C	C	C	G	G
Y	18165095	1 to 2	A	T	A	T	T	T	T	A	A
Y	18165165	1 to 5	A	G	A	A	A	A	A	G	G
Y	18168147	1 to 2	C	G	C	G	G	G	G	C	C
Y	18168570	1 to 5	A	G	A	A	A	A	A	G	G
Y	18169789	5 to PPY_Napoleon	C	A	C	C	C	C	C	C	A
Y	18171028	1 to 5	A	G	A	A	A	A	A	G	G
Y	18179043	1 to 2	A	T,C	C	T	T	T	T	C	C
Y	18179279	1 to 5	A	T	A	A	A	A	A	T	T
Y	18181944	5 to PPY_Thai	C	T	C	C	C	C	C	T	C
Y	18182140	1 to 2	C	T	C	T	T	T	T	C	C
Y	18203179	1 to 2	G	T	G	T	T	T	T	G	G
Y	18203498	5 to PPY_Thai	C	A	C	C	C	C	C	A	C
Y	18208085	1 to 2	G	A	G	A	A	A	A	G	G
Y	18210744	1 to 2	A	G	A	G	G	G	G	A	A
Y	18212894	1 to 5	G	A	G	G	G	G	G	A	A
Y	18213810	1 to 2	T	G	T	G	G	G	G	T	T
Y	18214518	1 to 2	C	T	T	C	C	C	C	T	T
Y	18216068	1 to 2	T	C	T	C	C	C	C	T	T
Y	18217896	5 to PPY_Napoleon	A	G	A	A	A	A	A	A	G
Y	18218025	1 to 2	C	T	C	T	T	T	T	C	C
Y	18219766	1 to 2	A	C	A	C	C	C	C	A	A
Y	18222248	1 to 5	T	C	T	T	T	T	T	C	C
Y	18223017	1 to 2	C	T	C	T	T	T	T	C	C
Y	18223581	1 to 5	A	G	A	A	A	A	A	G	G
Y	18225347	1 to 5	C	T	C	C	C	C	C	T	T
Y	18225705	1 to 2	C	A	C	A	A	A	A	C	C
Y	18233269	1 to 2	C	T	T	C	C	C	C	T	T
Y	18234618	1 to 2	T	C	T	C	C	C	C	T	T
Y	18234820	1 to 5	C	T	C	C	C	C	C	T	T
Y	18235998	1 to 2	G	C	G	C	C	C	C	G	G
Y	18245586	1 to 2	C	A	C	A	A	A	A	C	C
Y	18246799	1 to 5	T	C	T	T	T	T	T	C	C
Y	18247909	5 to PPY_Thai	A	T	A	A	A	A	A	T	A
Y	18248123	5 to PPY_Thai	C	T	C	C	C	C	C	T	C
Y	18251168	1 to 2	C	T	C	T	T	T	T	C	C
Y	18251293	1 to 5	C	T	C	C	C	C	C	T	T
Y	18251371	1 to 2	G	T	G	T	T	T	T	G	G
Y	18252220	1 to 2	G	A	G	A	A	A	A	G	G
Y	18255677	1 to 5	C	T	C	C	C	C	C	T	T
Y	18257434	5 to PPY_Napoleon	T	C	T	T	T	T	T	T	C
Y	18537923	1 to 2	T	C	T	C	C	C	C	T	T
Y	18546370	1 to 5	G	A	G	G	G	G	G	A	A
Y	18546430	1 to 2	G	A	G	A	A	A	A	G	G
Y	18546738	1 to 5	T	A	T	T	T	T	T	A	A
Y	18546759	1 to 5	A	C	A	A	A	A	A	C	C
Y	18548118	1 to 5	A	G	A	A	A	A	A	G	G
Y	18548692	1 to 2	C	A	C	A	A	A	A	C	C
Y	18549798	1 to 5	G	A	G	G	G	G	G	A	A
Y	18549817	1 to 5	G	T	G	G	G	G	G	T	T
Y	18550381	1 to 5	C	G	C	C	C	C	C	G	G
Y	18551613	1 to 5	C	T	C	C	C	C	C	T	T
Y	18554924	1 to 5	T	C	T	T	T	T	T	C	C
Y	18556374	1 to 5	G	C	G	G	G	G	G	C	C
Y	18556928	1 to 5	G	A	G	G	G	G	G	A	A
Y	18556970	3 to 4	T	C	T	C	T	T	C	T	T
Y	18557041	1 to 2	C	A,G	G	A	A	A	A	G	G
Y	18557394	1 to 5	C	T	C	C	C	C	C	T	T
Y	18557892	1 to 5	G	T	G	G	G	G	G	T	T
Y	18558194	5 to PPY_Napoleon	A	T	A	A	A	A	A	A	T
Y	18558692	1 to 5	T	C	T	T	T	T	T	C	C
Y	18559691	1 to 2	A	G	A	G	G	G	G	A	A
Y	18559816	1 to 5	C	A	C	C	C	C	C	A	A
Y	18559905	1 to 2	T	C	T	C	C	C	C	T	T
Y	18560022	1 to 2	C	A	C	A	A	A	A	C	C
Y	18563562	5 to PPY_Thai	G	C,T	C	C	C	C	C	T	C
Y	18566210	1 to 2	A	C	A	C	C	C	C	A	A
Y	18571113	1 to 2	A	G	A	G	G	G	G	A	A
Y	18571450	1 to 5	T	C	T	T	T	T	T	C	C
Y	18573966	5 to PPY_Thai	A	G	A	A	A	A	A	G	A
Y	18575618	1 to 2	T	C	T	C	C	C	C	T	T
Y	18576755	1 to 2	G	C	G	C	C	C	C	G	G
Y	18582558	5 to PPY_Napoleon	A	G	A	A	A	A	A	A	G
Y	18605625	1 to 2	T	A	T	A	A	A	A	T	T
Y	18605969	1 to 5	A	G	A	A	A	A	A	G	G
Y	18607176	1 to 5	A	T,C	T	T	T	T	T	C	C
Y	18607922	1 to 2	G	A	G	A	A	A	A	G	G
Y	18607973	5 to PPY_Thai	C	A	C	C	C	C	C	A	C
Y	18610249	3 to 4	T	C	T	C	T	T	C	T	T
Y	18611153	1 to 2	T	C,A	A	C	C	C	C	A	A
Y	18613175	1 to 5	A	G	A	A	A	A	A	G	G
Y	18614001	1 to 5	T	G	T	T	T	T	T	G	G
Y	18615737	1 to 2	C	T	C	T	T	T	T	C	C
Y	18615791	1 to 2	G	C	G	C	C	C	C	G	G
Y	18616342	1 to 2	G	T	G	T	T	T	T	G	G
Y	18616814	1 to 5	T	G	T	T	T	T	T	G	G
Y	18617216	5 to PPY_Thai	G	C	G	G	G	G	G	C	G
Y	18621109	1 to 2	A	T	A	T	T	T	T	A	A
Y	18632469	1 to 2	G	C	G	C	C	C	C	G	G
Y	18639553	1 to 5	G	A	G	G	G	G	G	A	A
Y	18639730	1 to 5	T	A	A	A	A	A	A	T	T
Y	18641008	1 to 2	G	A	G	A	A	A	A	G	G
Y	18641678	1 to 2	C	T	C	T	T	T	T	C	C
Y	18642462	1 to 5	C	T	C	C	C	C	C	T	T
Y	18649316	1 to 5	G	A	G	G	G	G	G	A	A
Y	18655069	1 to 2	T	A	T	A	A	A	A	T	T
Y	18656671	1 to 2	C	T	C	T	T	T	T	C	C
Y	18657566	1 to 5	T	C	T	T	T	T	T	C	C
Y	18657636	1 to 5	G	A	G	G	G	G	G	A	A
Y	18665552	1 to 5	G	A	G	G	G	G	G	A	A
Y	18668427	1 to 5	G	A	G	G	G	G	G	A	A
Y	18669480	1 to 2	T	G	T	G	G	G	G	T	T
Y	18671293	1 to 5	C	T	C	C	C	C	C	T	T
Y	18674141	1 to 2	G	A	G	A	A	A	A	G	G
Y	18674919	1 to 5	G	T	G	G	G	G	G	T	T
Y	18677160	1 to 5	C	T	C	C	C	C	C	T	T
Y	18679203	1 to 5	C	A	C	C	C	C	C	A	A
Y	18679314	1 to 5	C	A	C	C	C	C	C	A	A
Y	18679315	1 to 5	A	G,T	G	G	G	G	G	T	T
Y	18680402	1 to 2	G	C	C	G	G	G	G	C	C
Y	18681325	1 to 5	G	C	G	G	G	G	G	C	C
Y	18683659	1 to 2	T	C	T	C	C	C	C	T	T
Y	18685409	1 to 2	T	C	T	C	C	C	C	T	T
Y	18687020	1 to 5	T	C	T	T	T	T	T	C	C
Y	18693197	1 to 5	G	C	G	G	G	G	G	C	C
Y	18693806	5 to PPY_Thai	C	A	C	C	C	C	C	A	C
Y	18694927	1 to 2	G	A	G	A	A	A	A	G	G
Y	18694940	1 to 5	T	C	T	T	T	T	T	C	C
Y	18698932	1 to 2	G	T	G	T	T	T	T	G	G
Y	18700920	1 to 2	G	C	G	C	C	C	C	G	G
Y	18701230	5 to PPY_Napoleon	G	T	G	G	G	G	G	G	T
Y	18705832	1 to 2	A	G	A	G	G	G	G	A	A
Y	18705924	5 to PPY_Napoleon	T	G	T	T	T	T	T	T	G
Y	18706202	1 to 5	A	G	G	G	G	G	G	A	A
Y	18706736	1 to 5	T	G	T	T	T	T	T	G	G
Y	18708828	1 to 2	G	T	G	T	T	T	T	G	G
Y	18708846	1 to 5	C	T	C	C	C	C	C	T	T
Y	18714722	1 to 5	A	G	A	A	A	A	A	G	G
Y	18714906	1 to 2	T	C	T	C	C	C	C	T	T
Y	18717854	1 to 2	G	A	G	A	A	A	A	G	G
Y	18720919	5 to PPY_Thai	G	A	G	G	G	G	G	A	G
Y	18720981	1 to 2	C	G	C	G	G	G	G	C	C
Y	18721117	1 to 5	C	T	C	C	C	C	C	T	T
Y	18722976	5 to PPY_Napoleon	G	A	G	G	G	G	G	G	A
Y	18723337	1 to 5	T	C	T	T	T	T	T	C	C
Y	18724486	1 to 5	G	T	G	G	G	G	G	T	T
Y	18725608	1 to 5	A	G	A	A	A	A	A	G	G
Y	18732372	1 to 2	A	T	A	T	T	T	T	A	A
Y	18736459	1 to 2	A	T	A	T	T	T	T	A	A
Y	18740695	5 to PPY_Thai	A	G	A	A	A	A	A	G	A
Y	18741724	1 to 5	C	A	C	C	C	C	C	A	A
Y	18741829	1 to 5	A	T	A	A	A	A	A	T	T
Y	18741973	1 to 5	A	G	A	A	A	A	A	G	G
Y	18744949	2 to PAB_Duapuluh	G	A	G	G	A	G	G	G	G
Y	18747419	1 to 2	A	G	A	G	G	G	G	A	A
Y	18748041	5 to PPY_Napoleon	G	C	G	G	G	G	G	G	C
Y	18748114	1 to 5	G	A	G	G	G	G	G	A	A
Y	18757048	1 to 2	C	T	C	T	T	T	T	C	C
Y	18758068	5 to PPY_Thai	C	T	C	C	C	C	C	T	C
Y	18759060	1 to 5	C	T	C	C	C	C	C	T	T
Y	18759871	5 to PPY_Thai	A	G	A	A	A	A	A	G	A
Y	18760093	1 to ancestral; 1 to 2; 5 to PPY_Napoleon; 5 to PPY_Thai	G	T	G	T	T	T	T	T	G
Y	18760959	1 to 5	A	C,T	C	C	C	C	C	T	T
Y	18760981	1 to 2	T	C	T	C	C	C	C	T	T
Y	18762630	1 to 5	G	A	G	G	G	G	G	A	A
Y	18764842	1 to 2	G	A	G	A	A	A	A	G	G
Y	18770366	1 to 2	G	A	G	A	A	A	A	G	G
Y	18777701	5 to PPY_Napoleon	C	T	C	C	C	C	C	C	T
Y	18784526	1 to 2	A	G	A	G	G	G	G	A	A
Y	18786109	1 to 2	T	A	T	A	A	A	A	T	T
Y	18787622	5 to PPY_Napoleon	T	C	T	T	T	T	T	T	C
Y	18788667	1 to 5	T	C	T	T	T	T	T	C	C
Y	18788770	1 to 5	G	T	G	G	G	G	G	T	T
Y	18789221	1 to 5	A	G	A	A	A	A	A	G	G
Y	18794547	5 to PPY_Napoleon	G	A	G	G	G	G	G	G	A
Y	18803542	1 to 5	C	A	C	C	C	C	C	A	A
Y	18804432	1 to 2	G	A	G	A	A	A	A	G	G
Y	18804754	1 to 5	T	C	T	T	T	T	T	C	C
Y	18807492	1 to 2	T	C	T	C	C	C	C	T	T
Y	18807627	1 to 2	C	T	C	T	T	T	T	C	C
Y	18809563	5 to PPY_Thai	T	C	T	T	T	T	T	C	T
Y	18810071	1 to 2	C	A	C	A	A	A	A	C	C
Y	18811027	5 to PPY_Thai	C	T	C	C	C	C	C	T	C
Y	18811096	1 to 2	A	G	A	G	G	G	G	A	A
Y	18811121	1 to 2	C	T	C	T	T	T	T	C	C
Y	18811123	1 to 2	C	T	C	T	T	T	T	C	C
Y	18811421	1 to 5	T	C	T	T	T	T	T	C	C
Y	18811496	1 to 5	G	A	G	G	G	G	G	A	A
Y	18812402	1 to 5	G	T	G	G	G	G	G	T	T
Y	18812802	1 to 5	A	G	A	A	A	A	A	G	G
Y	18815353	1 to 2	T	C	T	C	C	C	C	T	T
Y	18815870	1 to 2	A	G	A	G	G	G	G	A	A
Y	18816064	1 to 5	G	A	G	G	G	G	G	A	A
Y	18816373	1 to 2	A	G	A	G	G	G	G	A	A
Y	18816725	1 to 5	G	T	G	G	G	G	G	T	T
Y	18824548	1 to 2	T	G	T	G	G	G	G	T	T
Y	18825603	1 to 2	G	A	G	A	A	A	A	G	G
Y	18826144	1 to 2	G	A	G	A	A	A	A	G	G
Y	18826802	1 to 2	T	A	T	A	A	A	A	T	T
Y	18826950	1 to 5	A	G	A	A	A	A	A	G	G
Y	18829794	1 to 2	A	G	A	G	G	G	G	A	A
Y	18831751	1 to 2	A	C	A	C	C	C	C	A	A
Y	18834494	1 to 5	T	C	T	T	T	T	T	C	C
Y	18835798	1 to 2	T	C	T	C	C	C	C	T	T
Y	18840384	1 to 2	G	A	G	A	A	A	A	G	G
Y	18840858	1 to 5	G	A	G	G	G	G	G	A	A
Y	18841385	5 to PPY_Napoleon	A	G	A	A	A	A	A	A	G
Y	18841657	1 to 2	G	A	G	A	A	A	A	G	G
Y	18842228	1 to 2	C	T	C	T	T	T	T	C	C
Y	18849891	5 to PPY_Napoleon	C	T	C	C	C	C	C	C	T
Y	18850067	1 to 2	C	A	C	A	A	A	A	C	C
Y	18854929	1 to 5	T	C	T	T	T	T	T	C	C
Y	18865938	5 to PPY_Thai	T	A	T	T	T	T	T	A	T
Y	18868064	1 to 2	G	C	G	C	C	C	C	G	G
Y	18868111	1 to 2	T	A,C	C	A	A	A	A	C	C
Y	18868202	1 to 2	C	G	C	G	G	G	G	C	C
Y	18870215	1 to 5	G	A	G	G	G	G	G	A	A
Y	18881425	1 to 2	G	A	A	G	G	G	G	A	A
Y	18881794	1 to 5	A	T	A	A	A	A	A	T	T
Y	18882602	1 to 5	G	T	G	G	G	G	G	T	T
Y	18882862	1 to 5	C	A	C	C	C	C	C	A	A
Y	18885276	1 to 5	C	T	T	T	T	T	T	C	C
Y	18888516	1 to 5	A	G	A	A	A	A	A	G	G
Y	18888622	1 to 2	A	G	A	G	G	G	G	A	A
Y	18894073	2 to 3	T	C	T	C	T	C	C	T	T
Y	18894816	1 to 5	T	G	T	T	T	T	T	G	G
Y	18895642	1 to 2	G	A	G	A	A	A	A	G	G
Y	18895969	1 to 2	A	G	A	G	G	G	G	A	A
Y	18897266	1 to 2	A	T	A	T	T	T	T	A	A
Y	18897612	1 to 2	C	T	C	T	T	T	T	C	C
Y	18897953	1 to 5	A	C	A	A	A	A	A	C	C
Y	18898326	1 to 5	C	T	C	C	C	C	C	T	T
Y	18898900	1 to 5	G	T	G	G	G	G	G	T	T
Y	18905983	1 to 5	A	T	A	A	A	A	A	T	T
Y	18907265	1 to ancestral; 1 to 2; 5 to PPY_Napoleon; 5 to PPY_Thai	A	G	A	G	G	G	G	G	A
Y	18910765	1 to 2	G	A	G	A	A	A	A	G	G
Y	18913591	1 to 5	A	G	A	A	A	A	A	G	G
Y	18916589	1 to 5	G	A	G	G	G	G	G	A	A
Y	18917164	1 to 2	T	C	T	C	C	C	C	T	T
Y	18920591	5 to PPY_Napoleon	C	G,A	G	G	G	G	G	G	A
Y	18926017	1 to 2	T	C	T	C	C	C	C	T	T
Y	18927963	5 to PPY_Napoleon	G	C	G	G	G	G	G	G	C
Y	18928117	1 to 2	G	A	G	A	A	A	A	G	G
Y	18936304	1 to 2	C	G	C	G	G	G	G	C	C
Y	18936571	1 to 5	A	C	A	A	A	A	A	C	C
Y	18937895	1 to 2	C	A	C	A	A	A	A	C	C
Y	18938211	1 to 5	G	A	G	G	G	G	G	A	A
Y	18938534	1 to 2	T	C	T	C	C	C	C	T	T
Y	18938686	1 to 5	G	T	G	G	G	G	G	T	T
Y	18939004	5 to PPY_Napoleon	T	C	T	T	T	T	T	T	C
Y	18939297	5 to PPY_Thai	A	C	A	A	A	A	A	C	A
Y	18940200	1 to 5	C	G	C	C	C	C	C	G	G
Y	18940717	1 to 5	C	T	C	C	C	C	C	T	T
Y	18941063	1 to 5	A	G	A	A	A	A	A	G	G
Y	18942210	5 to PPY_Thai	C	T	C	C	C	C	C	T	C
Y	18955511	1 to 5	T	G	T	T	T	T	T	G	G
Y	18959575	1 to 5	C	T	C	C	C	C	C	T	T
Y	18960140	1 to 2	A	G	A	G	G	G	G	A	A
Y	18960817	1 to 2	A	G	A	G	G	G	G	A	A
Y	18961431	1 to 5	C	A	C	C	C	C	C	A	A
Y	18964803	1 to 5	A	C	A	A	A	A	A	C	C
Y	18973311	1 to 2	T	C	T	C	C	C	C	T	T
Y	18978042	5 to PPY_Napoleon	T	A	T	T	T	T	T	T	A
Y	18980075	1 to 2	C	T	C	T	T	T	T	C	C
Y	18982978	1 to 5	G	C	G	G	G	G	G	C	C
Y	18992855	1 to 5	A	G	A	A	A	A	A	G	G
Y	18995270	1 to 2	G	A	G	A	A	A	A	G	G
Y	18997574	1 to 2	C	T	C	T	T	T	T	C	C
Y	18999484	1 to 2	T	C	T	C	C	C	C	T	T
Y	19001480	1 to 2	G	A	G	A	A	A	A	G	G
Y	19001906	1 to 2	C	T	C	T	T	T	T	C	C
Y	19002476	1 to 2	T	C	T	C	C	C	C	T	T
Y	19002683	1 to 2	G	C,T	T	C	C	C	C	T	T
Y	19003049	1 to 5	C	T	C	C	C	C	C	T	T
Y	19003205	1 to 2	T	C	T	C	C	C	C	T	T
Y	19005113	1 to 5	C	T	C	C	C	C	C	T	T
Y	19006682	1 to 5	G	A	G	G	G	G	G	A	A
Y	19007352	1 to 5	G	A	A	A	A	A	A	G	G
Y	19007439	1 to 5	C	T	C	C	C	C	C	T	T
Y	19012068	1 to 2	C	T	C	T	T	T	T	C	C
Y	19012161	1 to 5	G	A	G	G	G	G	G	A	A
Y	19020539	1 to 2	T	C	T	C	C	C	C	T	T
Y	19020568	1 to 2	T	G	T	G	G	G	G	T	T
Y	19020613	1 to 5	T	C	T	T	T	T	T	C	C
Y	19023740	1 to 5	A	C	A	A	A	A	A	C	C
Y	19024654	1 to 2	G	A	G	A	A	A	A	G	G
Y	19031786	1 to 2	G	A	G	A	A	A	A	G	G
Y	19032136	1 to 2	A	G	A	G	G	G	G	A	A
Y	19034754	1 to 5	G	A	G	G	G	G	G	A	A
Y	19036067	1 to 5	T	C	T	T	T	T	T	C	C
Y	19036377	1 to 2	C	A	C	A	A	A	A	C	C
Y	19036650	1 to 2	T	C	T	C	C	C	C	T	T
Y	19036698	1 to 2	C	G	C	G	G	G	G	C	C
Y	19039801	1 to 2	G	T	G	T	T	T	T	G	G
Y	19049132	1 to 2	C	A	C	A	A	A	A	C	C
Y	19050150	1 to 5	G	A,C	A	A	A	A	A	C	C
Y	19076533	1 to 5	A	G	A	A	A	A	A	G	G
Y	19078704	1 to 2	A	G	A	G	G	G	G	A	A
Y	19080140	1 to 2	C	G	C	G	G	G	G	C	C
Y	19086710	1 to ancestral; 1 to 5; 2 to 3; 2 to PAB_Duapuluh	T	C	T	C	T	C	C	C	C
Y	19087078	5 to PPY_Thai	C	T	C	C	C	C	C	T	C
Y	19087225	1 to 2	A	G	A	G	G	G	G	A	A
Y	19092620	5 to PPY_Napoleon	A	G	A	A	A	A	A	A	G
Y	19092746	5 to PPY_Napoleon	G	A	G	G	G	G	G	G	A
Y	19092750	1 to 5	A	G	A	A	A	A	A	G	G
Y	19093301	1 to 2	A	G	A	G	G	G	G	A	A
Y	19093452	5 to PPY_Thai	A	C	A	A	A	A	A	C	A
Y	19093558	1 to 2	A	G	A	G	G	G	G	A	A
Y	19093582	1 to 5	G	T	G	G	G	G	G	T	T
Y	19094069	1 to 5	C	T	C	C	C	C	C	T	T
Y	19094181	5 to PPY_Napoleon	T	C	T	T	T	T	T	T	C
Y	19094266	1 to 2	T	C	T	C	C	C	C	T	T
Y	19107785	1 to 2	A	C	A	C	C	C	C	A	A
Y	19107876	1 to 2	T	A,G	G	A	A	A	A	G	G
Y	19108081	1 to 2	T	A	T	A	A	A	A	T	T
Y	19110988	1 to 5	A	T	A	A	A	A	A	T	T
Y	19114878	1 to 2	C	A	C	A	A	A	A	C	C
Y	19128414	5 to PPY_Napoleon	G	A	G	G	G	G	G	G	A
Y	19128456	1 to 5	T	C	T	T	T	T	T	C	C
Y	19130363	1 to 5	G	A	G	G	G	G	G	A	A
Y	19132165	1 to 5	G	A	G	G	G	G	G	A	A
Y	19139943	1 to 2	G	A	G	A	A	A	A	G	G
Y	19141376	1 to 2	C	T	C	T	T	T	T	C	C
Y	19141600	1 to 5	A	G	A	A	A	A	A	G	G
Y	19142658	1 to 5	A	G	A	A	A	A	A	G	G
Y	19144665	1 to 5	G	T	G	G	G	G	G	T	T
Y	19144994	5 to PPY_Thai	T	C	T	T	T	T	T	C	T
Y	19145287	1 to 2	T	C	T	C	C	C	C	T	T
Y	19154418	1 to 5	G	A	G	G	G	G	G	A	A
Y	19156788	1 to 5	C	T	C	C	C	C	C	T	T
Y	19160932	1 to 5	A	G	A	A	A	A	A	G	G
Y	19161058	1 to 5	A	C,G	C	C	C	C	C	G	G
Y	19162853	1 to 5	G	A	G	G	G	G	G	A	A
Y	19163308	1 to 2	T	A	T	A	A	A	A	T	T
Y	19164062	1 to 5	A	G	A	A	A	A	A	G	G
Y	19164782	1 to 2	C	T	C	T	T	T	T	C	C
Y	19167346	5 to PPY_Thai	T	C	T	T	T	T	T	C	T
Y	19167988	1 to 5	A	T	A	A	A	A	A	T	T
Y	19169427	1 to 5	C	T	C	C	C	C	C	T	T
Y	19179898	1 to 2	C	T	C	T	T	T	T	C	C
Y	19180812	1 to 5	A	C	A	A	A	A	A	C	C
Y	19181027	1 to 5	C	T	C	C	C	C	C	T	T
Y	19182666	1 to 2	G	A	G	A	A	A	A	G	G
Y	19186908	5 to PPY_Thai	C	G	C	C	C	C	C	G	C
Y	19188263	1 to 2	C	T	C	T	T	T	T	C	C
Y	19192989	1 to 5	C	T	C	C	C	C	C	T	T
Y	19194473	1 to 5	T	C	T	T	T	T	T	C	C
Y	19194941	1 to 2	C	T	C	T	T	T	T	C	C
Y	19196016	5 to PPY_Napoleon	C	T	C	C	C	C	C	C	T
Y	19198251	1 to 2	G	A	G	A	A	A	A	G	G
Y	19199105	1 to 5	T	C	T	T	T	T	T	C	C
Y	19203721	1 to 2	A	G	A	G	G	G	G	A	A
Y	19205303	5 to PPY_Napoleon	C	T	C	C	C	C	C	C	T
Y	19207927	1 to 5	G	A	G	G	G	G	G	A	A
Y	19212401	1 to 5	T	C	T	T	T	T	T	C	C
Y	19214595	1 to 2	T	C	T	C	C	C	C	T	T
Y	19218765	1 to 5	C	T	C	C	C	C	C	T	T
Y	19218901	1 to 5	T	C	T	T	T	T	T	C	C
Y	19219360	1 to 2	C	T	C	T	T	T	T	C	C
Y	19219362	5 to PPY_Napoleon	T	G	T	T	T	T	T	T	G
Y	19219994	1 to 2	C	G	C	G	G	G	G	C	C
Y	19220016	5 to PPY_Napoleon	A	G	A	A	A	A	A	A	G
Y	19220651	5 to PPY_Thai	T	C	T	T	T	T	T	C	T
Y	19220891	1 to 5	C	T	C	C	C	C	C	T	T
Y	19224440	1 to 5	G	A	G	G	G	G	G	A	A
Y	19224686	1 to 2	A	G	A	G	G	G	G	A	A
Y	19225038	1 to 5	C	G	C	C	C	C	C	G	G
Y	19226632	5 to PPY_Napoleon	G	A	G	G	G	G	G	G	A
Y	19226816	1 to 2	G	A	G	A	A	A	A	G	G
Y	19228041	1 to 2	A	C	A	C	C	C	C	A	A
Y	19228164	5 to PPY_Napoleon	A	G	A	A	A	A	A	A	G
Y	19228740	1 to 5	T	C	T	T	T	T	T	C	C
Y	19231716	1 to 2	A	G	A	G	G	G	G	A	A
Y	19233490	1 to 5	T	C	T	T	T	T	T	C	C
Y	19233583	1 to 5	G	A	G	G	G	G	G	A	A
Y	19234488	5 to PPY_Napoleon	A	C	A	A	A	A	A	A	C
Y	19234753	1 to 5	G	A	G	G	G	G	G	A	A
Y	19236023	1 to 2	T	G	T	G	G	G	G	T	T
Y	19236667	1 to 5	C	A	C	C	C	C	C	A	A
Y	19236706	2 to PAB_Duapuluh	G	A	G	G	A	G	G	G	G
Y	19240837	1 to 2	T	A,G	G	A	A	A	A	G	G
Y	19255583	1 to 2	A	T	A	T	T	T	T	A	A
Y	19256428	5 to PPY_Napoleon	T	C	T	T	T	T	T	T	C
Y	19257603	1 to 2	T	G	T	G	G	G	G	T	T
Y	19257631	1 to 5	C	T	C	C	C	C	C	T	T
Y	19257753	1 to 5	T	A,G	A	A	A	A	A	G	G
Y	19259598	1 to ancestral; 1 to 2; 5 to PPY_Napoleon; 5 to PPY_Thai	T	A	T	A	A	A	A	A	T
Y	19262316	1 to 2	C	T	C	T	T	T	T	C	C
Y	19262636	1 to 2	T	A	T	A	A	A	A	T	T
Y	19266703	1 to 5	A	G	A	A	A	A	A	G	G
Y	19267324	5 to PPY_Napoleon	C	T	T	T	T	T	T	T	C
Y	19267677	1 to 2	T	C	T	C	C	C	C	T	T
Y	19268548	1 to 2	T	C	T	C	C	C	C	T	T
Y	19268714	1 to 2	C	G	C	G	G	G	G	C	C
Y	19268814	1 to 5	C	G	C	C	C	C	C	G	G
Y	19269732	1 to 2	T	C	T	C	C	C	C	T	T
Y	19273099	1 to 5	C	A	C	C	C	C	C	A	A
Y	19273456	5 to PPY_Napoleon	A	G	A	A	A	A	A	A	G
Y	19273465	1 to 5	T	C	T	T	T	T	T	C	C
Y	19273974	1 to 5	C	T	C	C	C	C	C	T	T
Y	19276143	1 to 5	A	G	A	A	A	A	A	G	G
Y	19279107	5 to PPY_Napoleon	C	T	C	C	C	C	C	C	T
Y	19280018	1 to ancestral; 1 to 2; 5 to PPY_Napoleon; 5 to PPY_Thai	G	A	G	A	A	A	A	G	A
Y	19292168	3 to PAB_ppy10	C	G	C	C	C	G	C	C	C
Y	19294412	5 to PPY_Napoleon	T	G	T	T	T	T	T	T	G
Y	19296600	1 to 5	G	A	G	G	G	G	G	A	A
Y	19305031	1 to 5	A	T	A	A	A	A	A	T	T
Y	19305909	1 to 2	G	A	G	A	A	A	A	G	G
Y	19306390	1 to 2	G	A	G	A	A	A	A	G	G
Y	19309803	1 to 2	A	T,C	C	T	T	T	T	C	C
Y	19313267	1 to 5	G	A	G	G	G	G	G	A	A
Y	19315241	1 to 2	A	G	A	G	G	G	G	A	A
Y	19317504	1 to 5	C	A	C	C	C	C	C	A	A
Y	19321821	1 to 5	G	C	G	G	G	G	G	C	C
Y	19323119	1 to 5	C	G,T	G	G	G	G	G	T	T
Y	19323184	1 to 2	A	T	A	T	T	T	T	A	A
Y	19333448	1 to 5	A	G	A	A	A	A	A	G	G
Y	19337345	1 to 5	C	A	C	C	C	C	C	A	A
Y	19343729	1 to 5	G	A	G	G	G	G	G	A	A
Y	19344219	1 to 2	T	C	T	C	C	C	C	T	T
Y	19345790	1 to 2	C	T	C	T	T	T	T	C	C
Y	19348586	1 to 2	C	T	C	T	T	T	T	C	C
Y	19348616	5 to PPY_Napoleon	T	G	T	T	T	T	T	T	G
Y	19348618	1 to ancestral; 1 to 2; 5 to PPY_Napoleon; 5 to PPY_Thai	A	G	A	G	G	G	G	G	A
Y	19349656	1 to 2	G	C,T	T	C	C	C	C	T	T
Y	19358185	1 to 2	A	T	A	T	T	T	T	A	A
Y	19358279	1 to 2	C	G	C	G	G	G	G	C	C
Y	19362082	1 to 2	A	G	A	G	G	G	G	A	A
Y	19363423	1 to 5	G	A	G	G	G	G	G	A	A
Y	19364793	5 to PPY_Napoleon	A	G	A	A	A	A	A	A	G
Y	19365743	1 to 5	C	T	C	C	C	C	C	T	T
Y	19367856	1 to 5	G	C	G	G	G	G	G	C	C
Y	19368299	1 to 2	G	A	G	A	A	A	A	G	G
Y	19370644	1 to 5	G	T	G	G	G	G	G	T	T
Y	19373038	1 to 5	C	A	C	C	C	C	C	A	A
Y	19378464	1 to 5	C	G	C	C	C	C	C	G	G
Y	19381087	1 to 2	C	A	C	A	A	A	A	C	C
Y	19383975	1 to 2	G	A	G	A	A	A	A	G	G
Y	19384232	1 to 2	A	T	A	T	T	T	T	A	A
Y	19389994	1 to 2	T	C	T	C	C	C	C	T	T
Y	19389996	1 to 2	A	G	A	G	G	G	G	A	A
Y	19392051	5 to PPY_Thai	G	A	G	G	G	G	G	A	G
Y	19392290	1 to 2	G	A	G	A	A	A	A	G	G
Y	19398979	1 to 2	A	C	A	C	C	C	C	A	A
Y	19399138	1 to 5	G	T	G	G	G	G	G	T	T
Y	19405332	1 to ancestral; 3 to 4	T	C	T	T	C	C	T	C	C
Y	19406054	1 to 5	A	G	A	A	A	A	A	G	G
Y	19406339	1 to 2	T	C	T	C	C	C	C	T	T
Y	19406550	1 to 5	A	G	A	A	A	A	A	G	G
Y	19406908	1 to 2	C	T	C	T	T	T	T	C	C
Y	19408207	1 to 5	A	G	A	A	A	A	A	G	G
Y	19409089	1 to 2	A	G	A	G	G	G	G	A	A
Y	19411196	1 to 2	A	G	A	G	G	G	G	A	A
Y	19411413	1 to 2	T	C	T	C	C	C	C	T	T
Y	19411489	1 to 2	G	T	G	T	T	T	T	G	G
Y	19411618	1 to 2	C	A	C	A	A	A	A	C	C
Y	19411657	1 to 5	G	A	G	G	G	G	G	A	A
Y	19412195	1 to 2	G	A	G	A	A	A	A	G	G
Y	19413637	1 to 2	G	A	G	A	A	A	A	G	G
Y	19418970	1 to 5	T	C	T	T	T	T	T	C	C
Y	19419019	1 to 2	T	G	T	G	G	G	G	T	T
Y	19419593	5 to PPY_Napoleon	A	T	A	A	A	A	A	A	T
Y	19419842	1 to 5	A	T,C	T	T	T	T	T	C	C
Y	19420176	1 to 5	C	A	C	C	C	C	C	A	A
Y	19422600	1 to 5	T	C	T	T	T	T	T	C	C
Y	19430888	1 to 5	C	G	C	C	C	C	C	G	G
Y	19440412	1 to 2	G	C	G	C	C	C	C	G	G
Y	19441189	1 to 2	G	A	G	A	A	A	A	G	G
Y	19441677	1 to 5	G	T	G	G	G	G	G	T	T
Y	19450900	1 to 2	A	G	A	G	G	G	G	A	A
Y	19451273	1 to 2	A	G	A	G	G	G	G	A	A
Y	19451407	1 to 5	C	A	C	C	C	C	C	A	A
Y	19451857	1 to 2	G	T	G	T	T	T	T	G	G
Y	19452418	1 to 5	A	G	A	A	A	A	A	G	G
Y	19455454	5 to PPY_Napoleon	A	G	A	A	A	A	A	A	G
Y	19469180	1 to 2	T	C	T	C	C	C	C	T	T
Y	19470260	1 to 2	C	T	C	T	T	T	T	C	C
Y	19471596	1 to 2	G	C	G	C	C	C	C	G	G
Y	19472090	1 to 2	A	G	A	G	G	G	G	A	A
Y	19472477	1 to 2	A	G	A	G	G	G	G	A	A
Y	19473292	1 to 5	A	G	A	A	A	A	A	G	G
Y	19473707	1 to 2	C	T	C	T	T	T	T	C	C
Y	19475577	1 to 5	G	A	G	G	G	G	G	A	A
Y	19476130	1 to 2	C	T	C	T	T	T	T	C	C
Y	19476139	1 to 2	C	T	C	T	T	T	T	C	C
Y	19480504	1 to 2	A	G	A	G	G	G	G	A	A
Y	19480796	1 to 2	A	T	A	T	T	T	T	A	A
Y	19481498	1 to 2	A	C	A	C	C	C	C	A	A
Y	19481501	1 to 5	C	T	C	C	C	C	C	T	T
Y	19482241	1 to 5	T	C	T	T	T	T	T	C	C
Y	19483456	1 to 5	T	C	T	T	T	T	T	C	C
Y	19486236	1 to 5	T	C	T	T	T	T	T	C	C
Y	19497695	1 to 5	T	G	T	T	T	T	T	G	G
Y	19499954	1 to ancestral; 1 to 2; 5 to PPY_Napoleon; 5 to PPY_Thai	C	T	T	C	C	C	C	C	T
Y	19502363	4 to PAB_Buschi	T	G	T	T	T	T	G	T	T
Y	19503272	1 to 2	A	G	A	G	G	G	G	A	A
Y	19503364	1 to 2	A	T	A	T	T	T	T	A	A
Y	19503801	1 to 5	T	C	T	T	T	T	T	C	C
Y	19518186	1 to 5	C	T	C	C	C	C	C	T	T
Y	19518966	1 to 2	T	C	T	C	C	C	C	T	T
Y	19519064	1 to 2	A	C	A	C	C	C	C	A	A
Y	19520064	1 to 5	A	T	A	A	A	A	A	T	T
Y	19520124	1 to 2	A	G	A	G	G	G	G	A	A
Y	19520344	1 to 5	T	C	T	T	T	T	T	C	C
Y	19520701	1 to 2	G	C	G	C	C	C	C	G	G
Y	19520823	2 to 3	C	A,G	G	A	G	A	A	G	G
Y	19520915	1 to 5	T	G	T	T	T	T	T	G	G
Y	19522277	1 to 2	T	C	T	C	C	C	C	T	T
Y	19524263	1 to 5	G	T	G	G	G	G	G	T	T
Y	19539419	1 to ancestral; 1 to 2; 5 to PPY_Napoleon; 5 to PPY_Thai	G	C	G	C	C	C	C	G	C
Y	19543825	5 to PPY_Thai	T	G	T	T	T	T	T	G	T
Y	19550068	5 to PPY_Napoleon	G	A	G	G	G	G	G	G	A
Y	19550275	1 to 2	A	G	A	G	G	G	G	A	A
Y	19550291	1 to 2	C	G	C	G	G	G	G	C	C
Y	19566135	1 to 5	G	C	C	C	C	C	C	G	G
Y	19566403	5 to PPY_Napoleon	G	C	G	G	G	G	G	G	C
Y	19566497	1 to 2	A	G	A	G	G	G	G	A	A
Y	19566948	5 to PPY_Thai	T	C	T	T	T	T	T	C	T
Y	21032928	1 to 2	C	T	C	T	T	T	T	C	C
Y	21033865	1 to 2	T	A	T	A	A	A	A	T	T
Y	21033904	1 to 2	T	G	T	G	G	G	G	T	T
Y	21034410	1 to 2	G	A	G	A	A	A	A	G	G
Y	21038630	1 to 2	C	T,A	A	T	T	T	T	A	A
Y	21038661	5 to PPY_Napoleon	G	C	G	G	G	G	G	G	C
Y	21039907	1 to 2	A	G	A	G	G	G	G	A	A
Y	21040766	1 to 5	A	G	A	A	A	A	A	G	G
Y	21044175	1 to 5	A	G	A	A	A	A	A	G	G
Y	21046825	1 to 5	C	G	C	C	C	C	C	G	G
Y	21046831	1 to 5	G	A	G	G	G	G	G	A	A
Y	21047244	1 to 2	A	G	A	G	G	G	G	A	A
Y	21052698	1 to 5	A	G	A	A	A	A	A	G	G
Y	21053608	1 to 5	G	A	G	G	G	G	G	A	A
Y	21054142	1 to 2	C	T	C	T	T	T	T	C	C
Y	21065299	1 to 5	T	C	T	T	T	T	T	C	C
Y	21066003	5 to PPY_Napoleon	A	C	A	A	A	A	A	A	C
Y	21066232	1 to 2	G	C	G	C	C	C	C	G	G
Y	21066555	1 to 2	A	G	A	G	G	G	G	A	A
Y	21070333	1 to 2	C	T	C	T	T	T	T	C	C
Y	21073586	5 to PPY_Thai	G	T	G	G	G	G	G	T	G
Y	21073653	1 to 5	G	T	G	G	G	G	G	T	T
Y	21074069	1 to 2	T	C	T	C	C	C	C	T	T
Y	21075682	1 to 2	T	C	T	C	C	C	C	T	T
Y	21075686	1 to 5	A	G	A	A	A	A	A	G	G
Y	21080458	1 to 2	G	A	G	A	A	A	A	G	G
Y	21080983	1 to 5	T	C	T	T	T	T	T	C	C
Y	21081291	1 to 2	G	T	G	T	T	T	T	G	G
Y	21081400	1 to 5	C	A,G	A	A	A	A	A	G	G
Y	21081506	1 to 2	C	T	C	T	T	T	T	C	C
[truncated: 478 more rows]

## Sheet: TableS13
Supplemental Table S13: MSY variant sites and genotypes in chimpanzees according to chimpanzee genome reference (panTro4)
CHROM	POS	NCBI_ss#	Branch	REF	ALT	Ancestral	PTS_Bobby	PTE/PTV_EB176JC	PTT/PTV_Tommy	PTV_8	PTV_Buttons	PTV_7	PTV_NA03450	PTT_Moritz	PTE_Koto	PTV_Koby	PTV_Bosco	PTV_Clint	PTV_Donald	PTE_Basho	PTS_Vincent	PTE_Damian	PTE_Akwaya_Jean	PTT_Vaillant	PTS_Bwambale
Y	16872590	1855211911	1 to 18	C	T	C	C	C	T	C	C	C	C	T	C	C	C	C	C	C	C	C	C	C	C
Y	16909659	1855212061	1 to 18	C	G	C	C	C	G	C	C	C	C	G	C	C	C	C	C	C	C	C	C	C	C
Y	16910442	1855212098	2 to PTT_Vaillant	C	G	C	C	C	C	C	C	C	C	C	C	C	C	C	C	C	C	C	C	G	C
Y	16919570	1855212120	2 to PTT_Vaillant	C	A	C	C	C	C	C	C	C	C	C	C	C	C	C	C	C	C	C	C	A	C
Y	16928124	1855212149	1 to 18	G	T	G	G	G	T	G	G	G	G	T	G	G	G	G	G	G	G	G	G	G	G
Y	16928185	1855212174	1 to 18	G	A	G	G	G	A	G	G	G	G	A	G	G	G	G	G	G	G	G	G	G	G
Y	16928306	1855212200	1 to ancestral; 1 to 18; 2 to 3; 2 to PTT_Vaillant	T	C	C	T	T	T	T	T	T	T	T	T	T	T	T	T	T	T	T	T	C	T
Y	16928385	1855212222	1 to 18	G	A	G	G	G	A	G	G	G	G	A	G	G	G	G	G	G	G	G	G	G	G
Y	16928389	1855212241	4 to 13	G	A	G	G	G	G	G	G	G	G	G	A	G	G	G	G	A	G	A	A	G	G
Y	16929719	1855212260	2 to PTT_Vaillant	A	G	A	A	A	A	A	A	A	A	A	A	A	A	A	A	A	A	A	A	G	A
Y	16929787	1855212281	4 to 13	T	C	T	T	T	T	T	T	T	T	T	C	T	T	T	T	C	T	C	C	T	T
Y	16929826	1855212296	2 to PTT_Vaillant	C	T	C	C	C	C	C	C	C	C	C	C	C	C	C	C	C	C	C	C	T	C
Y	16930934	1855212309	4 to 5	C	A	A	A	C	A	C	C	C	C	A	A	C	C	C	C	A	A	A	A	A	A
[truncated: 12,114 more rows]
